# Supplementary material for: Structure of Pigment Metabolic Pathways and Their Contributions to White Tepal Color Formation of Chinese Narcissus tazetta var. chinensis cv Jinzhanyintai
Source: MDPI journal article supplement (doi:10.3390/ijms18091923), 2017-09-08
Supplement: s1 [file s1]

## Supplementary Material

### Structure of Pigment Metabolic Pathways and their Contribution in Controlling Tepal Color Formation of Chinese *Narcissus tazetta* during Flower Development and Pigmentation Processes

Ren Yujun <sup>†</sup>, Yang Jingwen <sup>†</sup>, Lu Bingguo, Jiang Yaping, Chen Haiyang, Hong Yuwei, Binghua Wu, Miao Ying <sup>\*</sup>

**Correspondence:** ymiao@fafu.edu.cn

#### 1 Supplementary Tables

**Table S1.** Summary of RNA-seq data of tepal transcriptome of Chinese *Narcissus tazetta*.

| SampleID | BaseSum (nt)   | ReadSum    | AveRead (nt) | GC (%) | Q20 (%) | Q30 (%) |
|----------|----------------|------------|--------------|--------|---------|---------|
| Tmix     | 7,006,263,546  | 34,684,473 | 101          | 48.97  | 95.62   | 89.65   |
| T2       | 1,235,824,486  | 6,117,943  | 101          | 49.37  | 95.47   | 89.53   |
| T3       | 1,368,280,936  | 6,773,668  | 101          | 49.16  | 95.62   | 89.74   |
| T4       | 1,279,109,652  | 6,332,226  | 101          | 49.10  | 95.54   | 89.70   |
| T5       | 1,143,256,572  | 5,659,686  | 101          | 49.20  | 95.52   | 89.54   |
| Total    | 12,032,735,192 | 59,567,996 |              |        |         |         |

**Table S2.** Summary of sequence assembly of tepal transcriptome of Chinese *Narcissus tazetta*.

| Length range      | Contigs            | Transcripts     | Unigenes        |
|-------------------|--------------------|-----------------|-----------------|
| 200 -300          | 3,251,621 (98.45%) | 29,915 (22.16%) | 24,048 (38.09%) |
| 300-500           | 23,045 (0.70%)     | 24,750 (18.34%) | 15,718 (24.89%) |
| 500-1000          | 14,450 (0.44%)     | 28,313 (20.97%) | 10,290 (16.30%) |
| 1000-2000         | 9,298 (0.28%)      | 34,342 (25.44%) | 8,541 (13.53%)  |
| >2000             | 4,285 (0.13%)      | 17,665 (13.09%) | 4,544 (7.20%)   |
| Total number      | 3,302,699          | 134,985         | 63,141          |
| Total length (bp) | 210,805,969        | 137,475,863     | 44,423,386      |
| N50 length (bp)   | 49                 | 1,619           | 1,261           |
| Mean length (bp)  | 64                 | 1018            | 704             |

**Table S3.** Assessment of RNA-seq quality compared with assembled tepal transcriptome.

| Samples | ReadSum    | Total mapping       | Uniquely-mapping    | Multiply-mapping    |
|---------|------------|---------------------|---------------------|---------------------|
| Tmix    | 34,684,473 | 28,696,106 (82.73%) | 14,107,668 (49.16%) | 14,588,438 (50.84%) |
| T2      | 6,117,943  | 5,059,827 (82.70%)  | 2,508,883 (49.58%)  | 2,550,944 (50.42%)  |
| T3      | 6,773,668  | 5,612,674 (82.86%)  | 2,761,020 (49.19%)  | 2,851,654 (50.81%)  |
| T4      | 6,332,226  | 5,250,680 (82.92%)  | 2,630,885 (50.11%)  | 2,619,795 (49.89%)  |
| T5      | 5,659,686  | 4,720,887 (83.41%)  | 2,412,274 (51.10%)  | 2,308,613 (48.90%)  |

**Table S4.** Summary of function annotation of tepal transcriptome of Chinese *Narcissus tazetta*.

| Annotation Database         | Annotated number | 300≤length<1000 | length≥1000 |
|-----------------------------|------------------|-----------------|-------------|
| COG annotation              | 8977             | 2519            | 5398        |
| GO annotation               | 21368            | 7782            | 9566        |
| KEGG annotation             | 6801             | 2357            | 3165        |
| SwissProt annotation        | 22325            | 7904            | 10905       |
| NR annotation               | 29598            | 11591           | 12402       |
| Total annotated transcripts | 29730            | 11655           | 12415       |

**Table S5.** KEGG pathway mapping of unigenes in tepal transcriptome of Chinese *Narcissus tazetta*.  
(Please refer to the Excel file **Table S5** for detailed information).**Table S6.** Global and overview mapping of unigenes in KEGG pathways.  
(Please refer to the Excel file **Table S6** for detailed information).**Table S7.** CDS and protein sequences of flavonoids metabolic pathway associated unigenes in tepal transcriptome of Chinese *Narcissus tazetta*.  
(Please refer to the Excel file **Table S7** for detailed information).**Table S8.** List of unigenes in flavonoids metabolic pathway in tepal transcriptome of Chinese *Narcissus tazetta*.  
(Please refer to the Excel file **Table S8** for detailed information).**Table S9.** Enzymes in flavonoids metabolic pathway that cannot find corresponding unigenes in tepal transcriptome of Chinese *Narcissus tazetta*.

| Function                     | Gene    | Enzyme                                                   | KO ID (EC No.)              |
|------------------------------|---------|----------------------------------------------------------|-----------------------------|
| Phenylpropanoid biosynthesis | C2H     | Cinnamic 2-hydroxylase                                   | \ <sup>a</sup> (1.14.13.14) |
|                              | FDC1    | Phenacrylate decarboxylase                               | K20039 (4.1.1.102)          |
| Flavonoid biosynthesis       | F3'5'H  | Flavonoid 3',5'-hydroxylase                              | K13083 (1.14.13.88)         |
| Anthocyanin modification     | Mt1/Mt2 | Anthocyanin 3'-methyltransferase                         | K05279 (2.1.1.76)           |
|                              | Mf1/Mf2 | Anthocyanin 3',5'-methyltransferase                      | \ <sup>a</sup> (2.1.1.-)    |
|                              | 3MaT1   | Anthocyanin 3-O-glucoside-6"-O-malonyltransferase        | K12931 (2.3.1.171)          |
|                              | 3MaT2   | Anthocyanidin 3-O-glucoside-3",6"-O-dimalonyltransferase | K12932 (2.3.1.-)            |
|                              | 3GGT    | Anthocyanidin 3-O-glucoside 2"-O-glucosyltransferase     | K12933 (2.4.1.297)          |
|                              | UGT79B1 | Anthocyanidin 3-O-glucoside 2"-O-xylosyltransferase      | K17193 (2.4.2.51)           |
|                              | 3AT     | Anthocyanidin 3-O-glucoside 6"-O-acyltransferase         | \ <sup>a</sup> (2.3.1.215)  |

|                                   |                 |                                                           |                            |
|-----------------------------------|-----------------|-----------------------------------------------------------|----------------------------|
| Flavone and flavonol biosynthesis | <i>5MaT2</i>    | Anthocyanin 5-O-glucoside-4'''-O-malonyltransferase       | K12935 (2.3.1.214)         |
|                                   | <i>5AT</i>      | Anthocyanin 5-aromatic acyltransferase                    | K12936 (2.3.1.153)         |
|                                   | <i>UGAT</i>     | Cyanidin 3-O-glucoside 2''-O-glucuronosyltransferase      | K12937 (2.4.1.254)         |
|                                   | <i>UA3'5'GZ</i> | Delphinidin 3',5'-O-glucosyltransferase                   | \ <sup>a</sup> (2.4.1.249) |
|                                   | <i>FNS</i>      | Flavone synthase                                          | K13077 (1.14.11.22)        |
|                                   | <i>C12RT1</i>   | Flavanone 7-O-glucoside 2''-O-beta-L-rhamnosyltransferase | K13080 (2.4.1.236)         |
|                                   | <i>FOMT</i>     | Flavonol 3-O-methyltransferase                            | K05279 (2.1.1.76)          |
|                                   | <i>CROMT2</i>   | Flavonoid O-methyltransferase                             | K13272 (2.1.1.267)         |
|                                   | <i>GUSB</i>     | beta-Glucuronidase                                        | K01195 (3.2.1.31)          |
|                                   | <i>AS1</i>      | Aureusidin synthase                                       | K13079 (1.21.3.6)          |
| Isoflavonoid biosynthesis         | <i>IFS</i>      | 2-Hydroxyisoflavanone synthase                            | K13257 (1.14.13.136)       |
|                                   | <i>HIDH</i>     | 2-Hydroxyisoflavanone dehydratase                         | K13258 (4.2.1.105)         |

\<sup>a</sup>, Omission of number for the KO ID.

**Table S10.** Contents of flavonoid metabolites in tepals of Chinese *Narcissus tazetta* at different tepal pigmentation stages.

| Stage               | DHQ  | RT                 | NG                 | QC   | KF   | CA   | ED   |
|---------------------|------|--------------------|--------------------|------|------|------|------|
| Mean ± SD (mg/g FW) |      |                    |                    |      |      |      |      |
| T2                  | n.d. | 2.0402 ± 0.0877    | 1.3657 ± 0.0582    | n.d. | n.d. | n.d. | n.d. |
| T3                  | n.d. | 4.0918 ± 0.0873 ** | 4.7034 ± 0.1082 ** | n.d. | n.d. | n.d. | n.d. |
| T4                  | n.d. | 2.7622 ± 0.0755 ** | 3.7545 ± 0.1166 ** | n.d. | n.d. | n.d. | n.d. |
| T5                  | n.d. | 1.5995 ± 0.0564 ** | 2.1642 ± 0.0756 ** | n.d. | n.d. | n.d. | n.d. |

Note: n.d. means not detected. The value is averaged from three independent biological experiments with three technical repetitions. DHQ, dihydroquercetin; SD, standard deviation. RT, rutin; NG, Naringenin; QC, quercetin; KF, kaempferol; CA, caffeic acid; ED, eriodictyol; FW, fresh weight. Significant differences between T2 and the other stages were made by software Origin 7.5 using the student's *t*-tests. \*\* represents  $p < 0.01$ .

**Table S11.** CDS and protein sequences of carotenoids metabolic pathway associated unigenes in tepal transcriptome of Chinese *Narcissus tazetta*.

(Please refer to the Excel file **Table S11** for detailed information).

**Table S12.** List of unigenes in carotenoids metabolic pathway in tepal transcriptome of Chinese *Narcissus tazetta*.

(Please refer to the Excel file **Table S12** for detailed information).

**Table S13.** Enzymes in carotenoids biosynthetic pathway that cannot find corresponding unigenes in tepal transcriptome of Chinese *Narcissus tazetta*.

| Function               | Gene        | Enzyme                             | KO ID (EC No.)     |
|------------------------|-------------|------------------------------------|--------------------|
| Carotenoid degradation | <i>NSY</i>  | Neoxanthin synthase                | K14594 (5.3.99.9)  |
|                        | <i>CrtO</i> | beta-Carotene ketolase (CrtO type) | K09847 (1.14.15.9) |
|                        | <i>CrtW</i> | beta-Carotene ketolase (CrtW type) | K09847 (1.14.15.9) |
|                        | <i>ABA2</i> | Xanthoxin dehydrogenase            | K09841 (1.1.1.288) |
|                        | <i>AOG</i>  | Abscisate beta-glucosyltransferase | K14595 (2.4.1.263) |

**Table S14.** Contents of carotenoid metabolites in tepals of Chinese *Narcissus tazetta* at different pigmentation stages.

| Stage               | Lutein            | Zeaxanthin        | β-Carotene        | Astaxanthin |
|---------------------|-------------------|-------------------|-------------------|-------------|
| Mean ± SD (mg/g FW) |                   |                   |                   |             |
| T2                  | 0.0500 ± 0.0002   | 0.0024 ± 0.0001   | 0.0144 ± 0.0003   | n.d.        |
| T3                  | 0.1135 ± 0.0062** | 0.0105 ± 0.0005** | 0.0360 ± 0.0035** | n.d.        |
| T4                  | 0.0513 ± 0.0006   | 0.0085 ± 0.0002** | 0.0121 ± 0.0001   | n.d.        |
| T5                  | 0.0042 ± 0.0002** | 0.0011 ± 0.0001** | 0.0007 ± 0.0001** | n.d.        |

Note: n.d. means not detected. The value is averaged from three independent biological experiments with three technical repetitions. SD, standard deviation. FW, fresh weight. Significant differences between T2 and the other stages were made by software Origin 7.5 using the student's *t*-tests. \*\* represents  $p < 0.01$ .

**Table S15.** CDS and protein sequences of chlorophyll metabolic pathway associated unigenes in tepal transcriptome of Chinese *Narcissus tazetta*.

(Please refer to the Excel file **Table S15** for detailed information).

**Table S16.** List of unigenes in chlorophyll metabolic pathway in tepal transcriptome of Chinese *Narcissus tazetta*.

(Please refer to the Excel file **Table S16** for detailed information).

**Table S17.** Enzymes in chlorophyll metabolic pathway that cannot find corresponding unigenes in tepal transcriptome of Chinese *Narcissus tazetta*.

\<sup>a</sup>, Omission of number for the KO id.

**Table S18.** Contents of chlorophyll metabolites and total carotenoids in tepals of Chinese *Narcissus tazetta* at different pigmentation stages.

| Stage               | Chlorophyll <i>a</i> | Chlorophyll <i>b</i> | Total chlorophyll  | Total carotenoids |
|---------------------|----------------------|----------------------|--------------------|-------------------|
| Mean ± SD (mg/g FW) |                      |                      |                    |                   |
| T2                  | 40.87 ± 2.1754       | 29.88 ± 2.3739       | 70.76 ± 4.3428     | 8.92 ± 0.5334     |
| T3                  | 136.33 ± 10.0650**   | 70.73 ± 5.8019**     | 207.06 ± 15.2406** | 27.41 ± 2.4864**  |
| T4                  | 38.71 ± 7.2271       | 19.19 ± 3.0579**     | 57.90 ± 10.2549*   | 8.43 ± 0.9895     |
| T5                  | 1.92 ± 0.1393**      | 1.82 ± 0.3211**      | 3.74 ± 0.4497**    | 1.39 ± 0.1047**   |

| Function                | Gene        | Enzyme                                                         | KO id (EC no.)             |
|-------------------------|-------------|----------------------------------------------------------------|----------------------------|
| Proto IX formation      | <i>HemG</i> | Menaquinone-dependent protoporphyrinogen oxidase               | K00231 (1.3.3.4)           |
| Chlorophyll formation   | <i>BchE</i> | Anaerobic magnesium-protoporphyrin IX monomethyl ester cyclase | K04035 (1.14.13.81)        |
|                         | <i>BchJ</i> | Divinyl protochlorophyllide <i>a</i> 8-vinyl-reductase         | \ <sup>a</sup> (1.3.1.33 ) |
|                         | <i>ChlL</i> | Light-independent protochlorophyllide reductase subunit L      | K04037 (1.3.7.7 )          |
|                         | <i>ChlN</i> | Light-independent protochlorophyllide reductase subunit N      | K04038 (1.3.7.7 )          |
|                         | <i>ChlB</i> | Light-independent protochlorophyllide reductase subunit B      | K04039 (1.3.7.7 )          |
| Chlorophyll degradation | <i>PPD</i>  | Pheophorbidease                                                | K13544 (3.1.1.82)          |

Note: The value is averaged from three independent biological experiments with three technical repetitions. SD, standard deviation. FW, fresh weight. Significant differences between T2 and the other stages were made by software Origin 7.5 using the student's *t*-tests. \*\* represents  $p < 0.01$ , \* represents  $p < 0.05$ .

**Table S19.** Primers used for semi-qRT-PCR analysis in this research.  
(Please refer to the Excel file **Table S19** for detailed information).

## Supplementary Figures

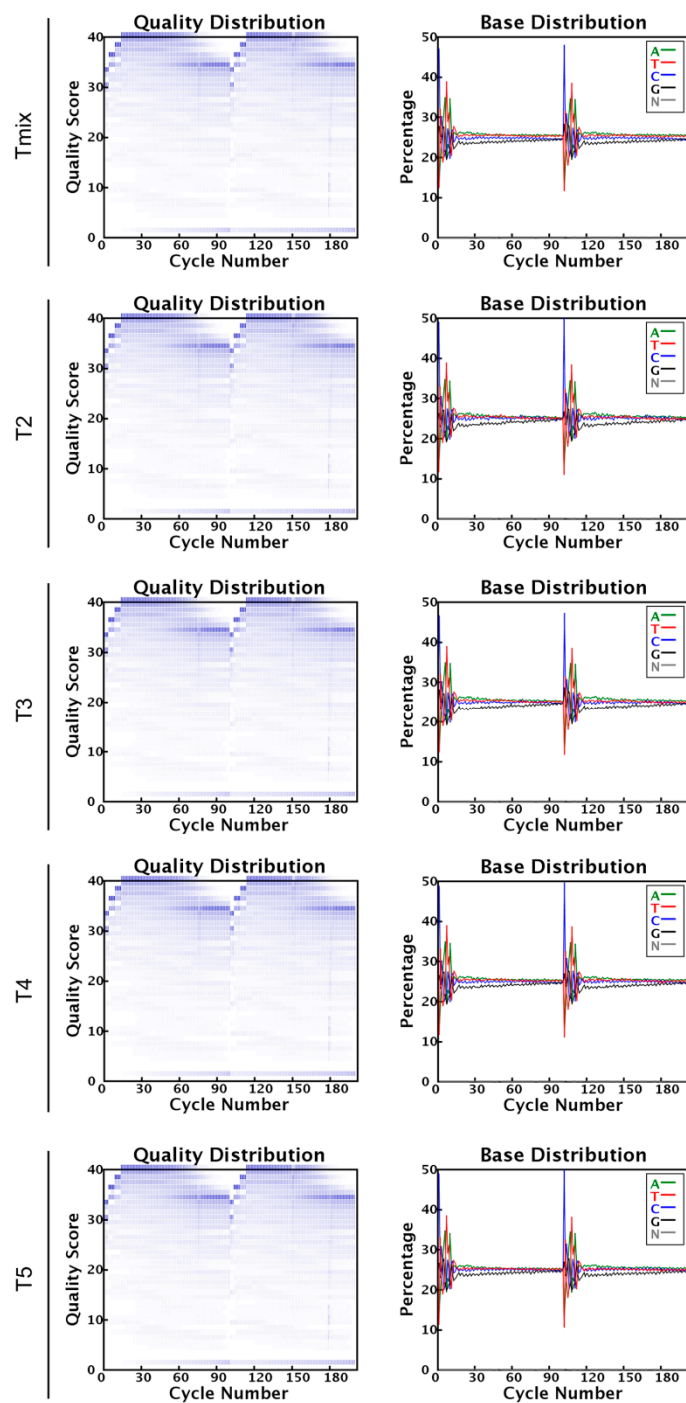

**Figure S1.** Raw data quality assessment of RNA-seq (Tmix) and DGE libraries based on base error rate (quality distribution) and randomness distribution calculations.

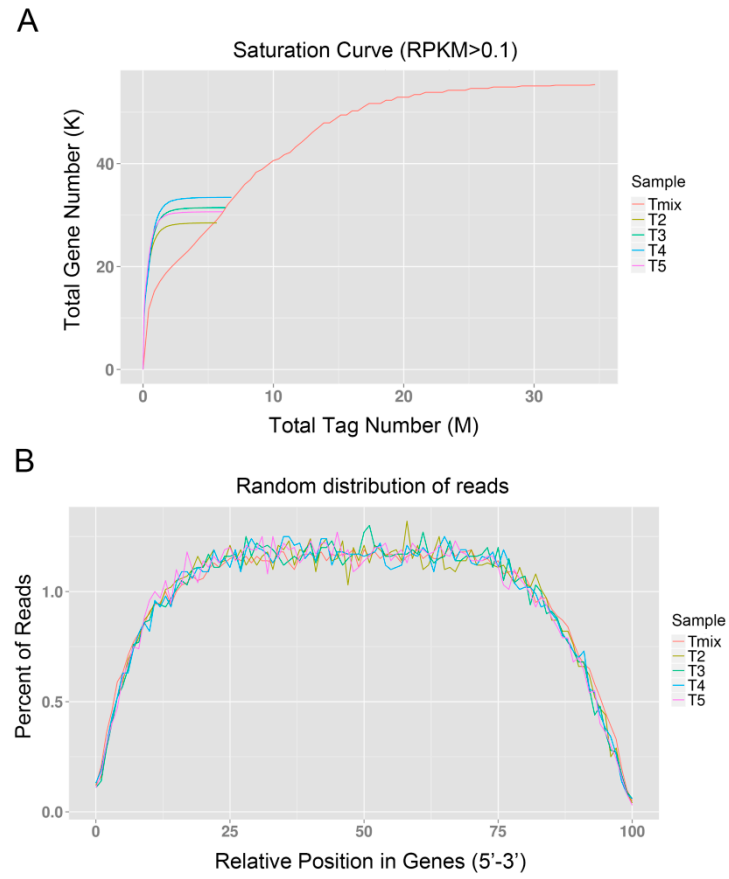

**Figure S2.** Expression saturation evaluation of sequenced libraries and randomness distribution of reads in assembled unigenes.

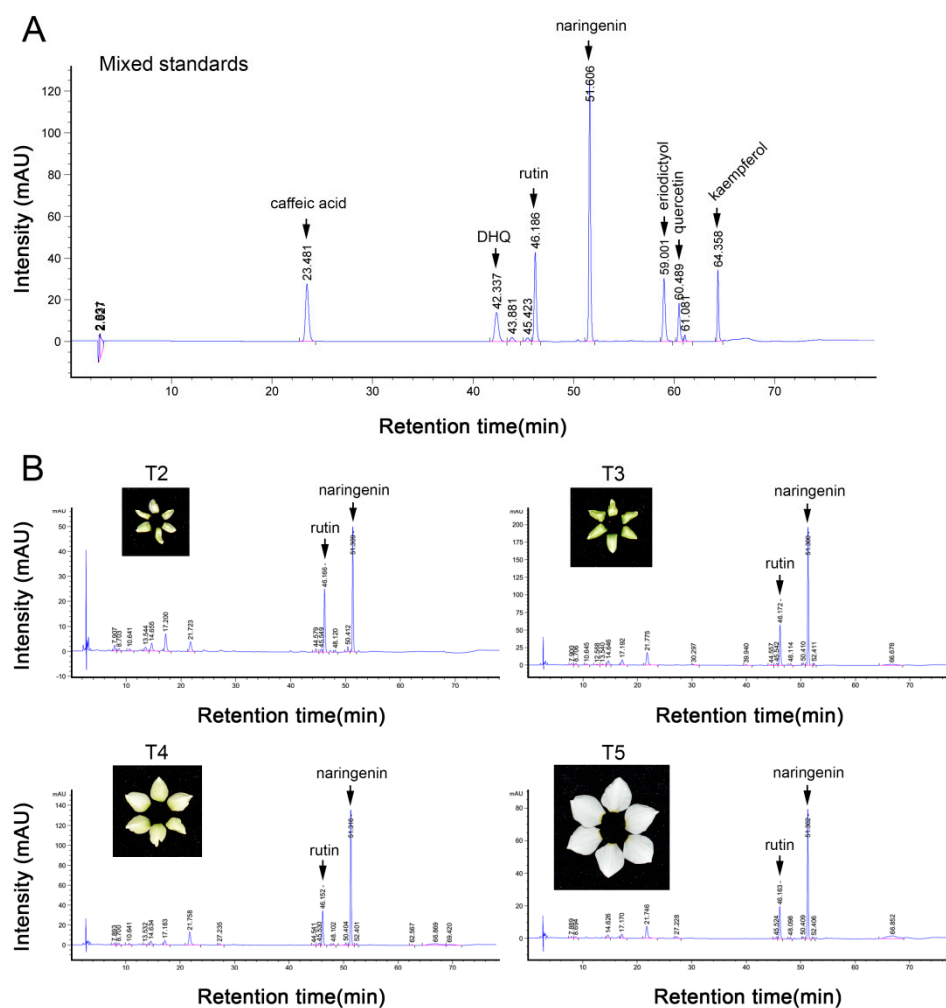

**Figure S3.** Detection of seven intermediate metabolites of flavonoids metabolic pathway in tepals of Chinese *Narcissus tazetta* at different tepal pigmentation stages by HPLC: **(A)** chromatograms of seven flavonoids standards; and **(B)** chromatograms of flavonoids in tepals at different pigmentation stages.



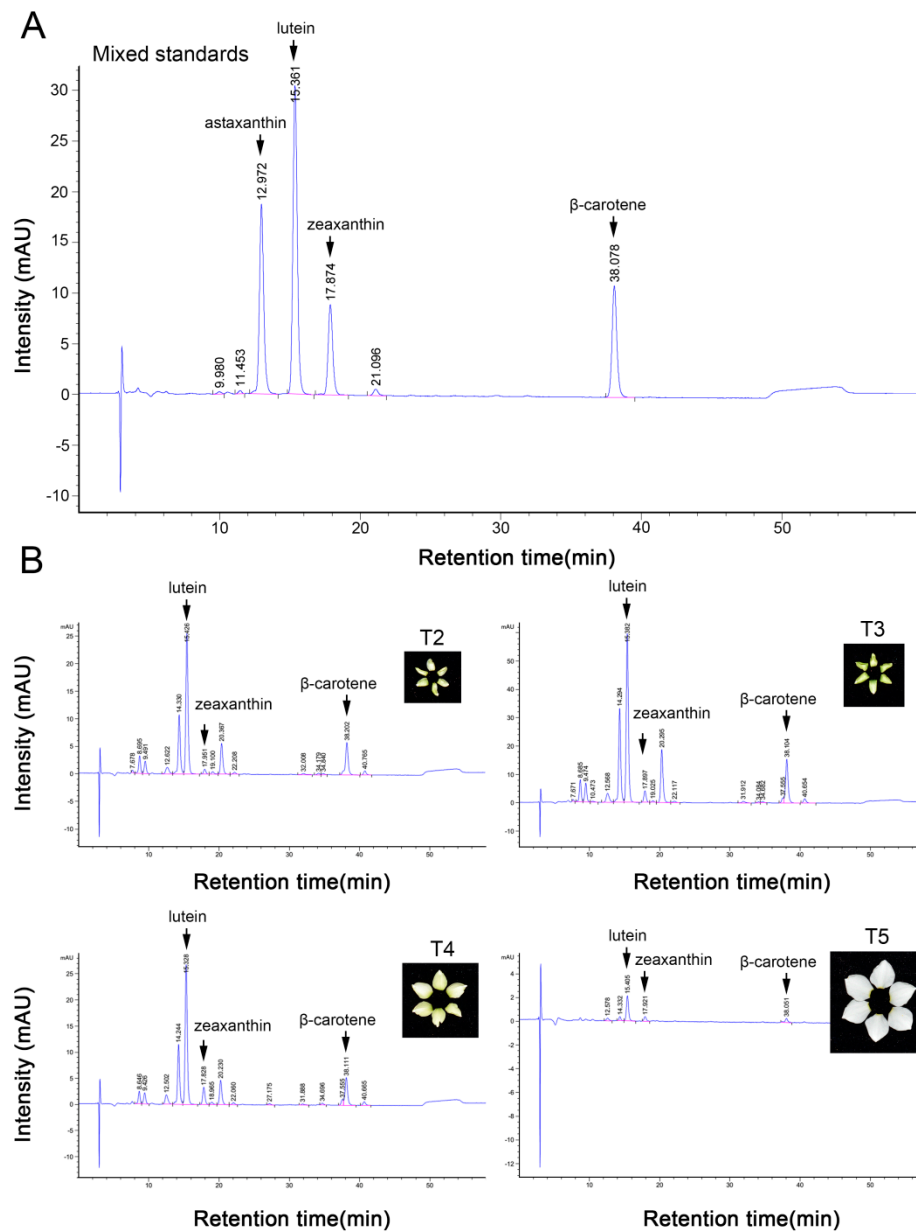

**Figure S4.** Detection of four intermediate metabolites of carotenoids metabolic pathway in tepals of Chinese *Narcissus tazetta* at different tepal pigmentation stages by HPLC: **(A)** chromatograms of four carotenoids standards; and **(B)** chromatograms of carotenoids in tepals at different pigmentation stages.
