# Supplementary material for: Structure of Pigment Metabolic Pathways and Their Contributions to White Tepal Color Formation of Chinese Narcissus tazetta var. chinensis cv Jinzhanyintai
Source: Int J Mol Sci. 2017 Sep 8;18(9):1923. doi: 10.3390/ijms18091923 (PMC5618572; doi:10.3390/ijms18091923)
Supplement: Supplementary file 1 [file ijms-18-01923-s001.zip]

Archive with 10 entries (10 files):
- ijms-220392-supplementary - for final.pdf
- R-Table S5.xlsx
- R-Table S6.xlsx
- R-Table S7.xlsx
- R-Table S8.xlsx
- R-Table S11.xlsx
- R-Table S12.xlsx
- R-Table S15.xlsx
- R-Table S16.xls
- R-Table S19.xlsx
