# Supplementary material for: Structure of Pigment Metabolic Pathways and Their Contributions to White Tepal Color Formation of Chinese Narcissus tazetta var. chinensis cv Jinzhanyintai
Source: Int J Mol Sci. 2017 Sep 8;18(9):1923. doi: 10.3390/ijms18091923 (PMC5618572; doi:10.3390/ijms18091923)
Supplement: Supplementary file 1 [file ijms-18-01923-s001.zip › R-Table S5.xlsx]

## Sheet: STable 5
Table S5. KEGG pathway mapping of unigenes in tepal transcriptome of Chinese narcissus.
Pathway	Pathway_ID	Gene_number	KOs
Glycolysis/Gluconeogenesis	ko00010	182	K01803+K00121+K00161+K01623+K00128+K03841+K00134+K01623+K00844+K00844+K01689+K00134+K00873+K00844+K00844+K00844+K01568+K00128+K01689+K14085+K01568+K00844+K01623+K01623+K00873+K00844+K00002+K00134+K01623+K01568+K01568+K00850+K00850+K00850+K00001+K00128+K00873+K00873+K01834+K00850+K00850+K00850+K00850+K03841+K00121+K01623+K00128+K00162+K00162+K00162+K00162+K01810+K01803+K00162+K00134+K00134+K00128+…
Citrate cycle (TCA cycle)	ko00020	85	K00234+K00234+K00161+K00025+K00026+K01648+K01900+K00658+K00030+K00026+K00026+K00026+K01648+K00164+K00164+K00164+K00164+K00162+K00162+K00162+K00162+K00026+K00026+K00162+K01648+K01647+K01647+K00162+K00031+K01681+K01681+K00030+K00031+K00627+K01648+K01681+K01681+K01647+K00026+K00627+K00627+K00627+K00161+K00025+K00627+K01647+K01900+K00235+K00026+K00026+K00627+K00382+K00382+K01679+K00382+K00030+K00164+…
Pentose phosphate pathway	ko00030	90	K01783+K01623+K03841+K01623+K01623+K00615+K00615+K01623+K00615+K00948+K01623+K00850+K00850+K00850+K01057+K00033+K00036+K00036+K00036+K00036+K00850+K00850+K00850+K00850+K03841+K01623+K00616+K01057+K01810+K01783+K00616+K01807+K01807+K00851+K01807+K00036+K03841+K00036+K01623+K03841+K01807+K01810+K01057+K01835+K00036+K00036+K00033+K00948+K01057+K01623+K01623+K03841+K00033+K00850+K01623+K00850+K01835+…
Pentose and glucuronate interconversions	ko00040	73	K01783+K01805+K01051+K01184+K00128+K00963+K01805+K01728+K01728+K01728+K00128+K01051+K01213+K01805+K01051+K00128+K00128+K00963+K00963+K00963+K00012+K00012+K00012+K00012+K01728+K01783+K01184+K00128+K01728+K01051+K01051+K01728+K01728+K01184+K01051+K00012+K01728+K00128+K00128+K00854+K00128+K00128+K01051+K01051+K01051+K01728+K01728+K00128+K00963+K00963+K01051+K01051+K01051+K01728+K01783+K01783+K01051+…
Fructose and mannose metabolism	ko00051	94	K01805+K00847+K00847+K01803+K01623+K03841+K01805+K01623+K00844+K00844+K00844+K00844+K00844+K01809+K01809+K00844+K01623+K00008+K01623+K01711+K00844+K01623+K00850+K01805+K00850+K00850+K00847+K00850+K00847+K00850+K00850+K00850+K03841+K01623+K01803+K01840+K02377+K03841+K00895+K00895+K00844+K01711+K01623+K00895+K03841+K01803+K00844+K00844+K01623+K01623+K03841+K00847+K00850+K01623+K00847+K00850+K01623+…
Galactose metabolism	ko00052	60	K01784+K01193+K01784+K00963+K07407+K00844+K00844+K01193+K00844+K00844+K00844+K00844+K00844+K00850+K00850+K00850+K01193+K01784+K01193+K01193+K00850+K01193+K00850+K00850+K00850+K01193+K00963+K00963+K00963+K07407+K00965+K01193+K01193+K01784+K01193+K00844+K00849+K00844+K01835+K00844+K01193+K00850+K07407+K01193+K00850+K01835+K00850+K12309+K01193+K01193+K01193+K00963+K00963+K00844+K01187+K01190+K01193+…
Ascorbate and aldarate metabolism	ko00053	48	K00434+K10047+K00128+K00128+K14085+K10047+K10047+K00469+K00128+K10046+K00128+K00012+K00012+K00012+K00012+K14190+K10047+K10047+K00128+K08232+K08232+K00434+K00434+K00434+K00423+K00434+K00434+K08232+K00012+K00128+K08232+K00434+K00469+K00128+K00434+K00128+K00128+K00064+K08232+K08232+K00225+K00128+K00434+K14190+K14085+K00434+K08232+K00128
Fatty acid biosynthesis	ko00061	55	K09458+K09458+K09458+K03921+K00208+K03921+K02160+K00059+K00208+K09458+K03921+K03921+K09458+K00648+K00648+K02160+K00059+K00059+K00059+K00648+K02372+K00059+K00059+K00059+K03921+K03921+K10781+K03921+K00059+K00645+K00208+K10782+K03921+K03921+K09458+K01962+K09458+K00208+K10781+K10781+K01961+K01962+K02160+K09458+K11262+K03921+K01962+K10781+K00208+K10781+K10781+K09458+K00208+K00059+K02160
Fatty acid elongation in mitochondria	ko00062	2	K07512+K01074
Fatty acid metabolism	ko00071	53	K01897+K00121+K00128+K00128+K14085+K01692+K01897+K00001+K00128+K00121+K00128+K01897+K07513+K07513+K00128+K00249+K00001+K00121+K01692+K00001+K00128+K00128+K01897+K01692+K00626+K00128+K00128+K07513+K01692+K01897+K00232+K01897+K00121+K00121+K01897+K01897+K00128+K00232+K01897+K01897+K00626+K00232+K14085+K07513+K00121+K01897+K01897+K00121+K01692+K07513+K00232+K00128+K14338
Synthesis and degradation of ketone bodies	ko00072	4	K01640+K00626+K01641+K00626
Steroid biosynthesis	ko00100	39	K08242+K00227+K00801+K14674+K08242+K08242+K14423+K14423+K01824+K14674+K01824+K08242+K00559+K14423+K14424+K08246+K00213+K00222+K09832+K00801+K00222+K14423+K00227+K09828+K05917+K05917+K00801+K00801+K00801+K14674+K01853+K14674+K14424+K00559+K09828+K00801+K00227+K07750+K09828
Ubiquinone and other terpenoid-quinone biosynthesis	ko00130	39	K00815+K05928+K01904+K01904+K00815+K05928+K01661+K05928+K09833+K09834+K12502+K00815+K01904+K01904+K05928+K05928+K06127+K05928+K05928+K12502+K00457+K00591+K02548+K01904+K06125+K12502+K02552+K12501+K00815+K09833+K06126+K01904+K12501+K12502+K06125+K00815+K00457+K01904+K01661
Oxidative phosphorylation	ko00190	255	K05578+K01535+K01507+K01507+K01535+K05572+K00234+K00234+K02136+K01535+K02133+K02153+K02153+K02150+K02128+K05577+K05577+K05572+K02266+K03885+K03936+K03936+K02109+K02112+K02154+K02154+K02154+K02145+K02150+K01535+K02138+K02262+K05577+K05577+K05577+K00417+K01535+K01535+K01535+K02256+K03940+K01507+K01535+K02152+K02149+K00419+K01535+K02152+K03949+K02259+K01535+K02266+K02266+K01535+K02265+K02265+K03952+…
Photosynthesis	ko00195	99	K03689+K02641+K02641+K02698+K02640+K02640+K02109+K08905+K02699+K02634+K02723+K02717+K14332+K02693+K02639+K02109+K02639+K02717+K08905+K02639+K02639+K02695+K03541+K02113+K02693+K02716+K02716+K02721+K02698+K02717+K02699+K02638+K02641+K02723+K02111+K02704+K02635+K08902+K02701+K02115+K02693+K03542+K02692+K08901+K02641+K02705+K08903+K08901+K02639+K02703+K02723+K02639+K02716+K08901+K02714+K02690+K02639+…
Photosynthesis - antenna proteins	ko00196	48	K08910+K08910+K08910+K08911+K08916+K08911+K08917+K08910+K08910+K08910+K08915+K08914+K08914+K08914+K08912+K08912+K08908+K08913+K08912+K08912+K08916+K08910+K08909+K08916+K08912+K08908+K08908+K08914+K14172+K14172+K08907+K08912+K08912+K08912+K08917+K08916+K08907+K08912+K08912+K08909+K08908+K08915+K08907+K08915+K08915+K08913+K08914+K08913
Purine metabolism	ko00230	174	K03043+K03043+K03046+K00940+K03505+K03026+K02325+K02343+K03046+K01490+K00759+K00856+K03046+K03046+K00873+K03046+K01490+K02321+K02321+K02321+K02321+K01488+K00873+K00948+K00940+K00860+K02325+K00856+K00873+K00873+K01952+K00759+K03011+K01952+K03017+K01945+K02684+K00939+K00939+K00860+K03016+K03000+K01519+K03008+K03013+K03787+K01945+K14721+K03005+K13811+K01514+K03040+K00939+K00962+K00939+K03014+K00873+…
Caffeine metabolism	ko00232	3	K00365+K00106+K00106
Pyrimidine metabolism	ko00240	137	K03043+K03043+K03046+K00940+K00857+K13800+K03505+K03026+K02325+K00609+K00609+K02343+K03046+K03046+K03046+K03046+K01937+K02321+K02321+K02321+K02321+K13421+K01493+K00940+K13421+K00876+K00876+K02325+K13800+K03011+K03017+K13421+K13421+K00761+K02684+K03016+K03000+K01489+K01519+K03008+K03013+K03787+K14721+K03005+K01956+K00609+K00876+K03040+K00962+K03014+K00876+K00876+K00876+K00940+K10807+K00943+K02328+…
Alanine, aspartate and glutamate metabolism	ko00250	66	K01580+K01915+K00609+K00609+K01953+K00827+K00261+K01755+K01915+K00813+K00830+K00827+K00813+K00814+K00814+K00814+K01915+K00814+K00261+K01580+K01580+K01915+K01956+K00609+K00827+K01915+K01580+K00135+K01953+K01953+K01915+K00278+K00294+K00764+K00813+K00820+K14455+K01940+K01953+K01953+K00261+K00820+K00278+K01939+K01755+K00262+K00261+K00814+K00813+K01955+K00264+K01953+K01756+K13566+K00827+K01953+K00265+…
Glycine, serine and threonine metabolism	ko00260	56	K00600+K00605+K00827+K00058+K01733+K14085+K00830+K00600+K00827+K01620+K00281+K00600+K01079+K00928+K01696+K01696+K00130+K01754+K00827+K00928+K01695+K00872+K00058+K00058+K00600+K00872+K01696+K01696+K01754+K00600+K12235+K00382+K00382+K00382+K00133+K00600+K01733+K12524+K14085+K00281+K00281+K00276+K00827+K00382+K00600+K01754+K00058+K00600+K00281+K00830+K00058+K00605+K00605+K01695+K00600+K00600
Cysteine and methionine metabolism	ko00270	105	K00549+K01738+K00558+K01762+K01611+K00815+K00789+K01251+K01738+K01738+K00813+K08967+K00815+K00789+K00813+K00640+K00558+K00558+K00558+K01251+K00547+K00547+K00928+K08963+K00789+K01738+K01011+K00797+K01251+K00928+K01738+K08967+K00558+K01244+K00797+K01611+K09880+K00815+K01762+K01738+K00640+K00797+K05933+K00558+K00789+K00789+K00789+K00016+K01739+K01761+K00813+K00797+K14455+K13034+K00640+K00549+K00815+…
Valine, leucine and isoleucine degradation	ko00280	57	K00826+K00128+K00128+K14085+K00826+K01692+K00826+K00128+K00128+K07513+K07513+K00128+K00020+K00166+K00249+K00253+K01640+K01969+K00826+K05607+K05607+K01692+K05605+K00128+K05605+K00128+K01692+K00826+K00626+K00128+K00128+K07513+K01692+K05605+K05605+K05605+K00140+K09699+K00826+K00167+K00128+K00382+K00382+K01641+K00382+K00626+K01968+K14085+K00167+K07513+K00382+K00826+K09699+K05605+K01692+K07513+K00128
Valine, leucine and isoleucine biosynthesis	ko00290	53	K00826+K00161+K01703+K01649+K00053+K01703+K00826+K00826+K00053+K01652+K01652+K01652+K01653+K00162+K00162+K00162+K00162+K01687+K00162+K01703+K00052+K01754+K00162+K00053+K00826+K00053+K01652+K00161+K00826+K01754+K01687+K00826+K01870+K01870+K01873+K01869+K01649+K01704+K01873+K01869+K01869+K00161+K01703+K01754+K01687+K00826+K00161+K00161+K00161+K00162+K00162+K01704+K00053
Lysine biosynthesis	ko00300	21	K00215+K14085+K00215+K00928+K01714+K00928+K10206+K00930+K01778+K01778+K01586+K01778+K14157+K00145+K00133+K12524+K14085+K01778+K01714+K00290+K01778
Lysine degradation	ko00310	32	K00128+K00128+K14085+K01692+K00658+K00128+K00164+K00164+K00164+K00164+K00128+K00128+K11433+K01692+K00128+K00128+K01692+K00626+K00128+K00128+K01692+K00128+K14157+K00626+K00164+K00658+K14085+K11429+K00290+K01692+K00128+K00164
Arginine and proline metabolism	ko00330	83	K14682+K01915+K00128+K01611+K00261+K00818+K01755+K01915+K14682+K00128+K14085+K00813+K00472+K00813+K00286+K00128+K01915+K00472+K00318+K00318+K00318+K00128+K00261+K00819+K00128+K01915+K00797+K00472+K01915+K00797+K01611+K01476+K00797+K01259+K01915+K00472+K12657+K01438+K01438+K00318+K00128+K00128+K01427+K00294+K13427+K00472+K00611+K00813+K00128+K00128+K00930+K00797+K01583+K14455+K01940+K00620+K00472+…
Histidine metabolism	ko00340	22	K00128+K00128+K14085+K01693+K00128+K00128+K00128+K00013+K00128+K00765+K00128+K00128+K00128+K00817+K00128+K01590+K11755+K01663+K14085+K11755+K00129+K00128
Tyrosine metabolism	ko00350	33	K00121+K00815+K01592+K00813+K00815+K00813+K00001+K01800+K00121+K01592+K01592+K00815+K00135+K00001+K00121+K00457+K01555+K00001+K00813+K00451+K14455+K00121+K00121+K00817+K00815+K00813+K00276+K01555+K00121+K00129+K00121+K00815+K00457
Phenylalanine metabolism	ko00360	80	K11188+K00430+K00815+K00430+K00430+K01904+K00588+K00813+K00430+K10775+K01904+K00815+K00430+K00430+K00430+K00813+K00430+K00430+K00430+K00588+K00588+K00430+K00430+K00430+K00430+K00430+K00430+K00430+K00430+K00430+K00430+K00430+K00430+K00430+K00430+K00588+K00430+K00430+K00815+K00430+K00430+K00430+K01904+K01904+K00430+K00430+K00457+K00430+K00813+K01904+K14455+K09754+K10775+K10775+K00817+K00815+K00430+…
Tryptophan metabolism	ko00380	42	K00128+K00128+K14085+K01692+K00128+K00164+K00164+K00164+K00164+K00128+K01867+K00128+K01692+K00128+K00128+K01692+K00626+K00128+K00128+K01692+K03781+K00128+K03781+K00626+K00164+K14085+K11817+K01501+K03781+K03781+K01501+K11816+K01501+K00463+K11816+K11816+K11816+K01692+K11816+K00128+K00164+K14338
Phenylalanine, tyrosine and tryptophan biosynthesis	ko00400	45	K01657+K00891+K01657+K00815+K00813+K00815+K01658+K00891+K01657+K13832+K13832+K13832+K00813+K01609+K01658+K01696+K01696+K01695+K13832+K00815+K01817+K01736+K01657+K00813+K14455+K01696+K01696+K01850+K01609+K00817+K00815+K01735+K01626+K01626+K01626+K01626+K01626+K00766+K00813+K01850+K01626+K01850+K00815+K01658+K01695
beta-Alanine metabolism	ko00410	40	K01580+K00128+K00128+K14085+K01692+K00128+K00128+K01580+K01580+K00128+K00797+K01580+K00797+K00249+K01918+K01431+K00797+K00207+K01692+K05605+K00128+K05605+K00128+K01692+K01464+K00128+K00128+K01692+K00797+K01578+K05605+K05605+K05605+K00128+K14085+K00276+K05605+K00797+K01692+K00128
Taurine and hypotaurine metabolism	ko00430	11	K01580+K10712+K10712+K10712+K10712+K01580+K01580+K01580+K10712+K00681+K00681
Selenocompound metabolism	ko00450	19	K00549+K11717+K13811+K01874+K01739+K01761+K00384+K00384+K00549+K13811+K01760+K01874+K08247+K00549+K00549+K00549+K01739+K13811+K00549
Cyanoamino acid metabolism	ko00460	35	K00600+K01188+K13035+K00600+K01188+K01188+K00600+K01188+K08249+K00600+K05350+K00681+K13035+K01188+K13034+K00600+K00681+K05350+K01188+K01188+K08249+K00600+K01501+K08249+K00600+K01501+K00600+K01501+K05350+K08249+K08248+K13034+K00600+K00600+K13034
Glutathione metabolism	ko00480	79	K00434+K01919+K00799+K00432+K00799+K01469+K00432+K00033+K00036+K00036+K00036+K00036+K00432+K00799+K00432+K00432+K01920+K00799+K00432+K00799+K01255+K01255+K00799+K00432+K00434+K00797+K00031+K00799+K00036+K10807+K00036+K00432+K00797+K00434+K00434+K10807+K01255+K01255+K01256+K00797+K00434+K00434+K00799+K00799+K00031+K01919+K00036+K00036+K00033+K00434+K00434+K00033+K00681+K00797+K10808+K00383+K00799+…
Starch and sucrose metabolism	ko00500	175	K01193+K01051+K00847+K00847+K00695+K01184+K00963+K00695+K00696+K00696+K00695+K13648+K13648+K00770+K00844+K00844+K01193+K00844+K00844+K00844+K01188+K00844+K01051+K01213+K00844+K00695+K00975+K00975+K00975+K01087+K13648+K01188+K01051+K01188+K01193+K00847+K01193+K01193+K00975+K00847+K01188+K01193+K01193+K00703+K00963+K00963+K00963+K01810+K00012+K00012+K00012+K00012+K13648+K13648+K01184+K01051+K01193+…
N-Glycan biosynthesis	ko00510	47	K00737+K12666+K12670+K09658+K00737+K03846+K00721+K03843+K03847+K03842+K01230+K07252+K03849+K00902+K12668+K09659+K03849+K01001+K12670+K03843+K07432+K03844+K12669+K00737+K03848+K12666+K00726+K07441+K01230+K12666+K03845+K00729+K05546+K03850+K01228+K03843+K03846+K07151+K01230+K01231+K07151+K06316+K00737+K01001+K03843+K03846+K00726
Other glycan degradation	ko00511	11	K12373+K01227+K12373+K01444+K12309+K12373+K01206+K12311+K12373+K01190+K12373
Other types of O-glycan biosynthesis	ko00514	3	K09667+K03691+K09667
Amino sugar and nucleotide sugar metabolism	ko00520	129	K01784+K00847+K00847+K01836+K01784+K00963+K12373+K13648+K13648+K00770+K00844+K00844+K00844+K00844+K00844+K01809+K01809+K00844+K01711+K00844+K00975+K00975+K00975+K13648+K01784+K00847+K12446+K12446+K00975+K12451+K00847+K10046+K00963+K00963+K00963+K01810+K00012+K00012+K00012+K00012+K13648+K13648+K01840+K01183+K02377+K12447+K00965+K00975+K01784+K08679+K00844+K01711+K01836+K00849+K13648+K12450+K00844+…
Glycosaminoglycan degradation	ko00531	11	K12373+K10532+K01205+K01205+K12373+K01205+K10532+K12309+K12373+K12373+K12373
Peptidoglycan biosynthesis	ko00550	1	K05366
Glycerolipid metabolism	ko00561	68	K00128+K03715+K00630+K03715+K13506+K07407+K13508+K13508+K13508+K13508+K00901+K14674+K00901+K00128+K14085+K00002+K11155+K00655+K00128+K03715+K03715+K14674+K00128+K07407+K13508+K00128+K13506+K06119+K06119+K13508+K00901+K00630+K13508+K13508+K13508+K00128+K00002+K00128+K13523+K06118+K13508+K00128+K00128+K07407+K13523+K13513+K13519+K13508+K03715+K09480+K00128+K00901+K13513+K00864+K00864+K09480+K14674+…
Inositol phosphate metabolism	ko00562	62	K00889+K01803+K10047+K00889+K00889+K00889+K00914+K00913+K00888+K10047+K10047+K00888+K01110+K00999+K00999+K00469+K05857+K00889+K00999+K00889+K01114+K01803+K10047+K10047+K01114+K01858+K01858+K00913+K01110+K00913+K00913+K01858+K05857+K01110+K01803+K01114+K00469+K05857+K05857+K01092+K01107+K00140+K00889+K00921+K00888+K01114+K03103+K00889+K05857+K00888+K00914+K00889+K00888+K00888+K00913+K00913+K00921+…
Glycosylphosphatidylinositol(GPI)-anchor biosynthesis	ko00563	18	K09658+K07542+K05292+K03858+K05293+K05293+K03859+K07542+K07541+K05289+K05286+K03434+K05284+K03861+K05285+K03857+K05310+K05310
Glycerophospholipid metabolism	ko00564	88	K00006+K00967+K00993+K00630+K08730+K13506+K13508+K13508+K13508+K13508+K00901+K13510+K01047+K14674+K13511+K00901+K06130+K00999+K00999+K01047+K00995+K00655+K14674+K06130+K00999+K00968+K01114+K13508+K01114+K13506+K13508+K00111+K00993+K00901+K01115+K13510+K13510+K00630+K13508+K00968+K13508+K13508+K01114+K08744+K00894+K08730+K13523+K06130+K06129+K13508+K06130+K13523+K13513+K00894+K13519+K13508+K06130+…
Ether lipid metabolism	ko00565	27	K00993+K13510+K01047+K14674+K01047+K14674+K01114+K01114+K00993+K01115+K13510+K13510+K01114+K13519+K13510+K01115+K00993+K00993+K01114+K14674+K01115+K01115+K01115+K01047+K14674+K01115+K01115
Arachidonic acid metabolism	ko00590	21	K00432+K01047+K14674+K01047+K00432+K00432+K14674+K00432+K00432+K00432+K00432+K01254+K00432+K05309+K00681+K00681+K14674+K01047+K14674+K00432+K00432
Linoleic acid metabolism	ko00591	8	K00454+K00454+K00454+K00454+K14674+K00454+K00454+K00454
alpha-Linolenic acid metabolism	ko00592	23	K01047+K14674+K00454+K01047+K14674+K10527+K01723+K00454+K00232+K10527+K05894+K10526+K00232+K14674+K00232+K00454+K01047+K00454+K14674+K00454+K00454+K00232+K00454
Sphingolipid metabolism	ko00600	30	K00654+K07407+K04713+K00654+K04712+K04712+K01634+K07407+K04708+K00654+K00654+K00654+K00654+K04712+K04718+K12349+K00654+K04713+K04711+K12349+K12349+K04715+K07407+K12309+K01190+K12349+K04715+K04708+K12349+K12349
Glycosphingolipid biosynthesis - globo series	ko00603	10	K12373+K07407+K07407+K01988+K12373+K01988+K07407+K12373+K12373+K12373
Glycosphingolipid biosynthesis - ganglio series	ko00604	6	K12373+K12373+K12309+K12373+K12373+K12373
Pyruvate metabolism	ko00620	130	K00028+K03778+K03778+K00161+K00128+K00025+K01649+K00029+K00029+K00029+K00873+K00026+K00128+K02160+K14085+K01759+K01759+K00873+K01069+K00026+K00026+K00026+K00128+K00873+K00873+K02160+K00128+K00162+K00162+K00162+K00162+K01759+K01759+K01595+K01595+K00026+K00026+K00162+K00029+K00128+K00028+K01759+K01759+K00162+K00873+K01595+K01759+K00102+K00873+K00627+K00128+K00128+K00016+K00026+K00627+K00627+K00627+…
Glyoxylate and dicarboxylate metabolism	ko00630	52	K01601+K00025+K01602+K00122+K00026+K01602+K00026+K00026+K00026+K01433+K01602+K00026+K00026+K01455+K01647+K01455+K01647+K11517+K01637+K01681+K01681+K01602+K11517+K01681+K01681+K01647+K00026+K00626+K00122+K11517+K00025+K01647+K00026+K00026+K11517+K00626+K01638+K00025+K11517+K00025+K11517+K00025+K00026+K11517+K00122+K11517+K01681+K00026+K00122+K00026+K00122+K00025
Propanoate metabolism	ko00640	46	K00128+K00128+K02160+K14085+K01692+K01900+K00128+K02160+K00128+K00128+K00249+K01692+K05605+K00128+K05605+K00128+K00016+K01692+K00626+K00128+K00128+K01692+K01578+K01962+K05605+K05605+K01895+K01895+K05605+K00140+K01900+K01961+K00128+K01962+K00626+K02160+K14085+K01895+K11262+K01962+K01899+K05605+K01692+K01900+K00128+K02160
Butanoate metabolism	ko00650	34	K01580+K00161+K01692+K01652+K01652+K01652+K01653+K00162+K00162+K00162+K00162+K01580+K01580+K00162+K00162+K01580+K00135+K01640+K01692+K01652+K00161+K01692+K00074+K00626+K01692+K01641+K00626+K00161+K00161+K00161+K00161+K00162+K01692+K00162
C5-Branched dibasic acid metabolism	ko00660	11	K01703+K01703+K01652+K01652+K01652+K01653+K01703+K01652+K01704+K01703+K01704
One carbon pool by folate	ko00670	25	K00600+K00605+K00600+K00297+K00297+K01433+K00600+K00297+K01934+K00600+K00601+K01934+K00604+K00600+K00297+K13998+K00602+K00600+K00600+K00600+K00605+K00605+K00600+K00297+K00600
Methane metabolism	ko00680	2	K01689+K00122
Carbon fixation in photosynthetic organisms	ko00710	140	K01783+K01803+K01601+K00028+K01623+K03841+K00025+K05298+K01623+K01602+K00029+K00029+K00029+K00855+K00873+K00026+K05298+K01623+K00615+K00615+K00813+K01623+K00873+K00615+K01623+K05298+K01602+K00026+K00026+K00026+K00813+K00814+K00814+K00873+K00873+K00814+K00814+K01602+K03841+K01623+K01595+K01595+K00026+K00026+K01803+K01783+K00029+K01807+K01807+K01100+K00028+K05298+K05298+K01807+K00873+K03841+K01595+…
Thiamine metabolism	ko00730	10	K11717+K06928+K00949+K00949+K04487+K04487+K00878+K14153+K03147+K03147
Riboflavin metabolism	ko00740	9	K00794+K00793+K11752+K14652+K00953+K00861+K14652+K14652+K00793
Vitamin B6 metabolism	ko00750	8	K01733+K08681+K00868+K06215+K01733+K06215+K06215+K06215
Nicotinate and nicotinamide metabolism	ko00760	17	K00858+K00858+K03426+K03787+K00763+K00763+K00763+K00278+K03517+K00763+K03787+K00767+K00278+K01950+K03787+K03787+K01950
Pantothenate and CoA biosynthesis	ko00770	32	K00826+K00859+K00053+K00826+K00826+K00053+K01652+K01652+K01652+K09680+K01653+K01687+K00053+K01598+K01918+K01431+K00859+K00207+K00826+K00053+K01652+K00826+K01464+K00606+K01687+K00826+K09680+K01687+K00826+K09680+K00053+K00606
Biotin metabolism	ko00780	6	K01942+K00833+K01942+K01942+K00652+K00652
Lipoic acid metabolism	ko00785	4	K03801+K03801+K03644+K03644
Folate biosynthesis	ko00790	11	K01307+K01307+K01930+K01633+K01930+K01113+K01495+K13998+K13941+K13950+K01930
Porphyrin and chlorophyll metabolism	ko00860	71	K01749+K00218+K00522+K00522+K02495+K01599+K03405+K00522+K13071+K02259+K01772+K03405+K13606+K00218+K00218+K01845+K00218+K03405+K03405+K01885+K02257+K02492+K02492+K13545+K08101+K01698+K01719+K00228+K00231+K00231+K00522+K02259+K10960+K03405+K13071+K03428+K01772+K03404+K13606+K04040+K04035+K02492+K01749+K10960+K13071+K00510+K00231+K13600+K01772+K01845+K01599+K00218+K01885+K03403+K10960+K01749+K02492+…
Terpenoid backbone biosynthesis	ko00900	42	K00021+K00021+K01662+K01770+K00869+K13789+K13789+K00991+K05356+K01662+K01662+K14066+K01823+K13789+K00919+K03527+K01662+K01662+K11778+K01597+K00787+K13789+K01662+K11778+K10960+K00099+K00626+K00021+K03526+K10960+K01641+K11778+K00626+K14066+K01662+K13789+K10960+K10960+K11778+K03526+K10960+K00021
Limonene and pinene degradation	ko00903	18	K00128+K00128+K01692+K00128+K00128+K00128+K01692+K00128+K00128+K01692+K00128+K00128+K01692+K00128+K00517+K00120+K01692+K00128
Diterpenoid biosynthesis	ko00904	13	K04120+K04121+K04123+K04123+K04120+K04125+K04122+K04121+K04120+K05282+K04121+K05282+K04124
Brassinosteroid biosynthesis	ko00905	9	K12640+K09591+K12639+K09587+K09591+K09588+K12637+K09589+K09587
Carotenoid biosynthesis	ko00906	28	K09837+K02291+K09842+K06443+K02293+K02294+K09843+K09843+K02291+K09838+K02294+K09839+K02291+K09843+K09841+K09840+K09835+K00514+K06444+K09840+K14593+K09843+K14606+K09840+K02293+K02294+K02291+K09840
Zeatin biosynthesis	ko00908	15	K10717+K10760+K10760+K00279+K00279+K10760+K00791+K00279+K00791+K00279+K13495+K00279+K10717+K00279+K10760
Nitrogen metabolism	ko00910	56	K01915+K00605+K01953+K01673+K01673+K01674+K00261+K01915+K10775+K01915+K00261+K01455+K01674+K01455+K01915+K01673+K01915+K01725+K01953+K01953+K01915+K01674+K01674+K01673+K01953+K01953+K00261+K10775+K10775+K00366+K01760+K10775+K00262+K10775+K00284+K00261+K00264+K01953+K01673+K00284+K10775+K01501+K01501+K01953+K00265+K00264+K01501+K00264+K00284+K01915+K10775+K01915+K00605+K00605+K01915+K01674
Sulfur metabolism	ko00920	33	K01738+K01738+K01738+K00640+K00860+K00860+K01738+K13811+K01738+K00860+K00860+K01738+K00640+K01082+K01739+K01107+K13034+K00640+K13811+K00392+K00640+K01082+K01760+K01738+K01738+K00640+K01738+K00392+K13034+K01738+K01739+K13811+K13034
Phenylpropanoid biosynthesis	ko00940	91	K11188+K09753+K00083+K00430+K00430+K00083+K00430+K01188+K01904+K00588+K13065+K00430+K10775+K01904+K00430+K00430+K00430+K01188+K00430+K01188+K01188+K00430+K00430+K00588+K00588+K00430+K00083+K00430+K00083+K00430+K00430+K00430+K00430+K00430+K00430+K00430+K00430+K00430+K00430+K09753+K00430+K00430+K00588+K00430+K00430+K00430+K00430+K00430+K01904+K01904+K00430+K00430+K00430+K05350+K12355+K09753+K01188+…
Flavonoid biosynthesis	ko00941	26	K00660+K00588+K13065+K05278+K00091+K00588+K00588+K01859+K13081+K01859+K00660+K00660+K00660+K00588+K00660+K05280+K09754+K00660+K13065+K00487+K00487+K05280+K05278+K05278+K00660+K00660
Flavone and flavonol biosynthesis	ko00944	5	K05279+K05280+K05279+K05280+K05279
Stilbenoid, diarylheptanoid and gingerol biosynthesis	ko00945	10	K00588+K13065+K00588+K00588+K00588+K09754+K13065+K00517+K00487+K00487
Isoquinoline alkaloid biosynthesis	ko00950	13	K00815+K01592+K00813+K00815+K00813+K01592+K01592+K00815+K00813+K00815+K00813+K00276+K00815
Tropane, piperidine and pyridine alkaloid biosynthesis	ko00960	26	K08081+K08081+K00815+K08081+K00813+K08081+K00815+K08081+K00813+K08081+K08081+K08081+K08081+K08081+K00815+K08081+K08081+K08081+K00813+K08081+K08081+K00817+K00815+K00813+K00276+K00815
Aminoacyl-tRNA biosynthesis	ko00970	54	K01893+K01889+K01889+K01893+K01893+K01875+K01887+K01887+K01885+K01867+K01875+K01883+K01876+K01889+K01889+K01881+K04567+K01893+K01868+K01874+K01892+K01868+K14164+K01889+K01880+K01890+K02434+K01893+K01893+K01872+K01866+K00604+K01866+K01870+K01870+K01873+K01869+K01892+K01886+K01874+K01881+K01876+K01885+K01872+K01873+K01887+K01869+K01869+K04567+K01872+K01876+K01872+K01876+K01887
Metabolism of xenobiotics by cytochrome P450	ko00980	1	K00799
Drug metabolism-cytochrome P450	ko00982	1	K00799
Biosynthesis of unsaturated fatty acids	ko01040	49	K10256+K03921+K10256+K03921+K10257+K00059+K10256+K03921+K10255+K03921+K07513+K07513+K00059+K00059+K00059+K00059+K00059+K10251+K10257+K10257+K00059+K10703+K03921+K03921+K03921+K00059+K10256+K10258+K10256+K10256+K10256+K07513+K03921+K03921+K00232+K00232+K10257+K10257+K00232+K07513+K10256+K03921+K10256+K10258+K10256+K10257+K07513+K00232+K00059
ABC transporters	ko02010	12	K05658+K05658+K05658+K05658+K05658+K05658+K05674+K05658+K05658+K05658+K05658+K05658
Ribosome biogenesis in eukaryotes	ko03008	147	K12619+K14548+K11130+K12619+K07936+K12619+K14539+K07562+K14563+K12619+K07936+K11131+K03097+K14558+K14563+K14563+K14563+K12845+K03097+K03097+K14548+K14548+K14548+K14536+K07562+K11130+K07562+K12619+K14574+K11129+K11129+K13288+K13288+K11128+K01164+K02218+K02218+K02218+K07936+K07936+K03115+K12619+K12619+K12619+K12619+K12619+K14535+K14559+K14559+K03115+K03097+K03097+K07562+K14561+K13288+K11108+K11129+…
Ribosome	ko03010	450	K02875+K02930+K02930+K02937+K02941+K02941+K02879+K02878+K02918+K02949+K02949+K02988+K02917+K02994+K02894+K02885+K02942+K02983+K02980+K02896+K02912+K02876+K02943+K02942+K02882+K02977+K02971+K02934+K02880+K02977+K02960+K02938+K02870+K02905+K02941+K02941+K02889+K02981+K02940+K02934+K02975+K02969+K02891+K02881+K02991+K02991+K02936+K02924+K02872+K02942+K02908+K02934+K02883+K02955+K02947+K02989+K02900+…
RNA transport	ko03013	199	K12881+K03260+K12881+K14298+K14326+K12812+K12812+K14325+K14312+K14303+K03237+K12878+K07936+K03231+K03262+K03253+K03237+K14303+K03259+K03231+K03231+K12812+K14311+K07562+K13137+K03242+K13126+K07936+K14303+K03259+K03253+K13126+K14325+K14325+K03236+K14293+K03260+K07562+K07562+K14298+K14298+K14298+K14305+K03249+K14327+K12160+K01164+K13126+K07936+K07936+K13126+K13025+K14304+K14294+K03113+K12879+K12877+…
mRNA surveillance pathway	ko03015	139	K11583+K12881+K12881+K00565+K06965+K14326+K12812+K12812+K14325+K04382+K14376+K03267+K08873+K08873+K14396+K14396+K11583+K11583+K14396+K12812+K13917+K13126+K13917+K06965+K03267+K13126+K14376+K13917+K14396+K14325+K14325+K11583+K14406+K14396+K14396+K14327+K00565+K14397+K03267+K14411+K04354+K13126+K13126+K13025+K14294+K12877+K04382+K04382+K12881+K11584+K11584+K11584+K14396+K14396+K13126+K11584+K08873+…
RNA degradation	ko03018	127	K12621+K03654+K12619+K12619+K03681+K03654+K03654+K04077+K12619+K01689+K12580+K12592+K12590+K01689+K13126+K11600+K03514+K12619+K08300+K12581+K12581+K12614+K13126+K12607+K12622+K04077+K12606+K12606+K12625+K12625+K12593+K12619+K12611+K12625+K07573+K13126+K12606+K12592+K13126+K12593+K12619+K12619+K12619+K12619+K12619+K12581+K12581+K12608+K12602+K12608+K12627+K04077+K00962+K01689+K12620+K12621+K12623+…
RNA polymerase	ko03020	48	K03043+K03043+K03046+K03026+K03046+K03046+K03046+K03046+K03011+K03017+K03016+K03000+K03008+K03013+K14721+K03005+K03040+K03014+K03020+K03012+K03024+K03013+K03027+K03022+K14721+K03025+K03015+K03010+K03023+K02999+K03021+K03002+K03018+K03006+K03009+K03046+K03043+K03043+K03013+K03043+K03006+K03046+K03043+K03046+K03043+K03046+K03046+K03046
Basal transcription factors	ko03022	45	K03123+K03138+K03124+K03127+K03122+K03123+K03139+K03139+K10842+K03134+K03139+K03138+K03135+K03143+K14535+K03135+K03122+K10842+K03141+K03133+K03122+K02202+K03130+K03126+K03142+K03128+K03124+K03139+K10844+K14649+K03126+K03126+K03126+K03120+K03137+K03142+K03144+K03125+K06634+K10845+K03124+K03131+K03128+K03138+K14535
DNA replication	ko03030	65	K03111+K03505+K02325+K02542+K02343+K10754+K02542+K10739+K07466+K07466+K07466+K02321+K02321+K02321+K02321+K10756+K10743+K10745+K10742+K07466+K02325+K04802+K10739+K02684+K04799+K10755+K04799+K07466+K07466+K07466+K02328+K10745+K10756+K10739+K10755+K10739+K07466+K07466+K02212+K02542+K07466+K10747+K02210+K02542+K02541+K02320+K02320+K02320+K02209+K10744+K02327+K10747+K04802+K10754+K07466+K07466+K07466+…
Spliceosome	ko03040	211	K12881+K12896+K12621+K12826+K12833+K12891+K12881+K11093+K12861+K11096+K12812+K12812+K12829+K11093+K12864+K12878+K12812+K11099+K12836+K12830+K12823+K12823+K12622+K12845+K12741+K03283+K03283+K12856+K12625+K12625+K12843+K12869+K12840+K12840+K12832+K12625+K03283+K11086+K03283+K11098+K09567+K12868+K12836+K12820+K12820+K11088+K13025+K12879+K12877+K12836+K03283+K12627+K12843+K12821+K12897+K11093+K12833+…
Proteasome	ko03050	64	K02732+K02730+K03036+K03031+K02725+K03033+K03033+K02725+K06700+K02727+K02727+K02727+K03031+K03031+K03037+K02727+K02738+K03030+K03028+K02734+K03033+K02732+K02726+K02735+K10881+K03030+K02728+K03063+K02725+K11599+K02739+K02730+K02729+K02731+K03062+K03036+K02737+K03028+K03039+K02736+K02736+K03061+K03065+K03066+K03038+K03029+K03032+K03035+K06699+K03033+K03031+K03065+K03038+K02727+K02728+K02727+K03035+…
Protein export	ko03060	59	K03106+K03217+K03104+K09490+K12946+K10956+K03109+K09481+K09481+K13280+K09490+K09490+K12275+K12275+K03106+K09647+K03100+K12946+K09481+K09481+K07342+K13280+K03116+K09490+K09490+K13431+K09648+K12948+K07342+K03217+K12948+K03217+K03070+K03106+K12275+K03118+K03100+K03100+K03070+K12272+K13431+K13431+K03217+K12947+K03108+K03106+K03107+K09490+K03110+K09540+K10956+K12948+K07342+K10956+K09490+K03116+K09540+…
Base excision repair	ko03410	35	K03505+K02325+K10802+K10801+K10773+K01246+K02325+K04802+K03575+K10802+K04799+K03652+K10773+K04799+K01247+K03660+K01246+K01246+K02328+K10563+K10772+K01142+K10803+K10798+K10747+K01246+K01246+K02327+K10747+K10798+K04802+K01246+K02324+K02335+K10773
Nucleotide excision repair	ko03420	64	K03505+K02325+K10754+K10739+K03868+K07466+K07466+K07466+K10756+K07466+K10839+K02325+K04802+K10739+K10839+K10842+K03868+K10839+K03143+K10140+K10755+K10842+K07466+K07466+K03141+K10849+K07466+K02328+K02202+K10756+K10739+K10839+K03142+K10839+K10844+K10755+K10739+K07466+K10570+K07466+K07466+K10747+K10838+K10848+K03142+K03144+K10610+K02327+K06634+K10747+K10845+K10846+K04802+K10754+K07466+K07466+K07466+…
Mismatch repair	ko03430	59	K08735+K03111+K03505+K02343+K10754+K08736+K08736+K08736+K08736+K08735+K08735+K08735+K08735+K10739+K07466+K07466+K07466+K10756+K08739+K08739+K07466+K08734+K08734+K04802+K10739+K10755+K07466+K07466+K07466+K02328+K10858+K10756+K10739+K10755+K10739+K07466+K07466+K07466+K10747+K02327+K10747+K04802+K10754+K07466+K07466+K07466+K07456+K08737+K08737+K08734+K10746+K07466+K10746+K07466+K08735+K10746+K10746+…
Homologous recombination	ko03440	48	K03111+K03505+K02343+K10739+K07466+K07466+K03553+K04482+K07466+K07466+K10875+K03165+K10739+K10869+K10870+K10871+K07466+K07466+K10881+K03553+K07466+K04482+K02328+K10901+K08775+K10739+K10901+K10739+K07466+K03553+K07466+K07466+K10866+K03165+K08991+K02327+K10865+K07466+K07466+K07466+K03655+K02335+K07466+K10879+K10880+K07466+K10880+K10875
Non-homologous end-joining	ko03450	8	K10884+K04799+K10885+K10886+K04799+K10777+K10866+K10865
MAPK signaling pathway - yeast	ko04011	2	K11238+K11244
Phosphatidylinositol signaling system	ko04070	55	K02183+K00889+K10047+K00889+K00889+K00889+K00901+K00914+K00913+K00901+K00888+K10047+K10047+K00888+K01110+K00999+K00999+K05857+K00889+K00999+K00889+K10047+K10047+K00913+K01110+K00913+K00913+K05857+K01110+K00901+K05857+K05857+K01092+K01107+K00889+K02183+K00901+K00921+K00888+K00981+K00889+K05857+K00888+K00914+K00889+K00888+K00901+K00888+K00913+K00913+K02183+K00921+K00914+K00921+K02183
Plant hormone signal transduction	ko04075	207	K14431+K14488+K14500+K14432+K14432+K14431+K14505+K14498+K14486+K14498+K14490+K14432+K14488+K14492+K14488+K14488+K14497+K14491+K14500+K14486+K14431+K14496+K14432+K14492+K13946+K14490+K14492+K14432+K14506+K14488+K14488+K14432+K14486+K14488+K14497+K14497+K14496+K14492+K14488+K14495+K13464+K14431+K14431+K14431+K14488+K14498+K13464+K14432+K14432+K13464+K14496+K14496+K14488+K14432+K14500+K14496+K14496+…
Ubiquitin mediated proteolysis	ko04120	115	K03872+K09561+K03094+K03094+K04649+K10580+K03094+K03364+K04649+K03178+K03348+K04506+K03868+K04506+K03347+K10576+K10575+K10575+K04506+K10580+K03872+K03363+K03355+K03363+K04506+K04506+K06689+K03363+K10571+K10573+K03363+K06688+K03868+K10688+K10688+K10583+K06689+K10575+K10598+K03094+K06689+K04554+K03094+K03094+K04649+K10140+K10579+K10144+K06689+K10684+K06689+K03363+K10686+K10144+K10589+K03358+K10606+…
Sulfur relay system	ko04122	13	K12161+K14168+K03635+K14169+K01011+K03635+K04487+K04487+K03639+K00566+K14169+K03639+K11996
SNARE interactions in vesicular transport	ko04130	30	K08490+K08515+K08493+K08489+K08498+K08500+K08515+K08486+K08495+K08503+K08489+K08493+K08493+K08498+K08492+K08517+K08504+K08493+K08515+K08505+K08495+K08496+K08490+K08495+K08496+K08496+K08496+K08486+K08516+K08490
Regulation of autophagy	ko04140	23	K00914+K08341+K08336+K08343+K08341+K08341+K08341+K08334+K08337+K08339+K08333+K08333+K08269+K00914+K08342+K07198+K08269+K00914+K08269+K08341+K08269+K08341+K08269
Protein processing in endoplasmic reticulum	ko04141	241	K12666+K11863+K09584+K04079+K08054+K12670+K09561+K03094+K13993+K09490+K03094+K03094+K08057+K09584+K03237+K13993+K08054+K03237+K10956+K03868+K07953+K09487+K08054+K08054+K03347+K09580+K09487+K10575+K10575+K09481+K09481+K09490+K08288+K13993+K08057+K13993+K08057+K09490+K09487+K09487+K12275+K12275+K03283+K03283+K13993+K08057+K10839+K11863+K14026+K01230+K06689+K13993+K01456+K13993+K03283+K03283+K14003+…
Lysosome	ko04142	2	K01275+K06497
Endocytosis	ko04144	98	K00889+K12183+K12189+K11824+K11826+K11826+K00889+K00889+K00889+K04646+K12198+K03283+K03283+K07897+K07897+K12194+K12194+K00889+K03283+K03283+K12193+K00889+K11827+K12191+K11866+K12194+K11826+K03283+K03283+K11826+K03283+K03283+K12183+K12489+K12194+K12196+K12198+K12198+K01115+K12486+K07897+K12197+K03283+K03283+K03283+K03283+K12188+K12184+K11824+K12190+K12479+K12492+K12196+K01528+K12195+K12471+K11866+…
Phagosome	ko04145	116	K08054+K02153+K02153+K02150+K07375+K07374+K08057+K07375+K02154+K02154+K02154+K02145+K02150+K08054+K10956+K00914+K07375+K07374+K08054+K08054+K07375+K07375+K07375+K07375+K01365+K02152+K02149+K02152+K07375+K07375+K09481+K09481+K01365+K01365+K08057+K07375+K08057+K07375+K08057+K02152+K01365+K07897+K07897+K07375+K04392+K07374+K07374+K02145+K02145+K02145+K02145+K09481+K07374+K09481+K02151+K02151+K03661+…
Peroxisome	ko04146	83	K04565+K01897+K13348+K06664+K04564+K00830+K00869+K08764+K11147+K01897+K13341+K03426+K13354+K04565+K04565+K01897+K07513+K07513+K12663+K04565+K12261+K00031+K04564+K11517+K13237+K13348+K13345+K06664+K01640+K00031+K13337+K06664+K13336+K13343+K11517+K13348+K04565+K04565+K13237+K01897+K13346+K12261+K13335+K07513+K03781+K01578+K11517+K01897+K00232+K13338+K01897+K13343+K01897+K01897+K00232+K11517+K13347+…
mTOR signaling pathway	ko04150	1	K02991
Cardiac muscle contraction	ko04260	1	K00412
Notch signaling pathway	ko04330	1	K06066
Focal adhesion	ko04510	1	K06274
ECM-receptor interaction	ko04512	1	K06237
NOD-like receptor signaling pathway	ko04621	1	K12797
Plant-pathogen interaction	ko04626	153	K02183+K04371+K04079+K13412+K13448+K13448+K13413+K13412+K13412+K13447+K13448+K13448+K13448+K13448+K13447+K09487+K13430+K13430+K13430+K13459+K13459+K13448+K13447+K13412+K09487+K13448+K13447+K13448+K13448+K09487+K09487+K13448+K13456+K13464+K13448+K13412+K13412+K13412+K13412+K13412+K13412+K13412+K13464+K13448+K13464+K02358+K02358+K13448+K12795+K13430+K13412+K02358+K13414+K13412+K13420+K13448+K13412+…
Natural killer cell mediated cytotoxicity	ko04650	19	K04371+K04371+K04371+K06268+K04392+K06268+K04392+K06268+K04368+K04371+K04371+K04392+K04371+K04368+K04371+K04371+K04371+K04371+K04371
Circadian rhythm - mammal	ko04710	15	K03094+K03094+K03094+K03868+K03347+K03868+K03094+K03094+K03094+K02295+K03094+K03347+K03347+K03347+K03094
Circadian rhythm - plant	ko04712	27	K00660+K03097+K12118+K03097+K03097+K03115+K03115+K03097+K03097+K00660+K00660+K00660+K00660+K03097+K12115+K03115+K12132+K03115+K00660+K12132+K12124+K12119+K12132+K12130+K03097+K00660+K00660
Regulation of actin cytoskeleton	ko04810	1	K05745
Salivary secretion	ko04970	1	K13911
Vibrio cholerae infection	ko05110	2	K10955+K10955
Malaria	ko05144	1	K13837
Amoebiasis	ko05146	2	K10955+K10955
Systemic lupus erythematosus	ko05322	1	K11254
