# Supplementary material for: Structure of Pigment Metabolic Pathways and Their Contributions to White Tepal Color Formation of Chinese Narcissus tazetta var. chinensis cv Jinzhanyintai
Source: Int J Mol Sci. 2017 Sep 8;18(9):1923. doi: 10.3390/ijms18091923 (PMC5618572; doi:10.3390/ijms18091923)
Supplement: Supplementary file 1 [file ijms-18-01923-s001.zip › R-Table S6.xlsx]

## Sheet: STable 6
Table S6. Global and overview mapping of unigenes in KEGG pathways.
Pathway	Pathway_id	Gene_number	KOs
Metabolic pathways	ko01100	2019	K03043+K01580+K00889+K01783+K00737+K12666+K05578+K01784+K10717+K00660+K01193+K01805+K03043+K10760+K00654+K03046+K01897+K01051+K00940+K00847+K00847+K00600+K05572+K01803+K01919+K00234+K00234+K02136+K01601+K00549+K11188+K12670+K00967+K02133+K02153+K02153+K09753+K01738+K03689+K00857+K14682+K00121+K00083+K00558+K09837+K00695+K01915+K01784+K00028+K00826+K10047+K02150+K00161+K01749+K13800+K01184+K09458+…
Biosynthesis of secondary metabolites	ko01110	898	K01580+K01783+K10717+K00660+K10760+K00940+K00600+K01803+K00234+K00234+K00549+K11188+K09753+K14682+K00121+K00083+K09837+K08242+K00826+K10047+K00161+K01749+K08081+K01657+K00218+K00891+K01623+K00128+K00963+K03841+K00134+K01762+K00025+K01953+K01490+K12640+K00227+K08081+K01703+K01649+K01657+K00430+K01623+K00815+K00844+K00844+K08081+K01689+K00801+K00818+K00430+K00053+K00789+K00083+K02495+K00134+K00873+…
Microbial metabolism in diverse environments	ko01120	1	K00265
