# Supplementary material for: Structure of Pigment Metabolic Pathways and Their Contributions to White Tepal Color Formation of Chinese Narcissus tazetta var. chinensis cv Jinzhanyintai
Source: Int J Mol Sci. 2017 Sep 8;18(9):1923. doi: 10.3390/ijms18091923 (PMC5618572; doi:10.3390/ijms18091923)
Supplement: Supplementary file 1 [file ijms-18-01923-s001.zip › R-Table S7.xlsx]

## Sheet: STable 17
Table S17. CDS and protein sequences of flavonoids metabolic pathway associated unigenes in tepal transcriptome of Chinese narcissus.
Pathway	Gene	Gene ID	CDS sequence	Protein sequence
Phenylpropanoid biosynthesis	PAL	c37401.graph_c1	ATGGAGAATGGAAATGGTCATGCTCCCTCTATCTGTCTCAACAAGGACCCCCTCAACTGGGGAGCCGCAGCCGAGTCATTGAATGGGAGTCACTTGTATGAAGTGAAGAGAATGGTGGAGGAGTTTCGGAACCCCGTGGTGAGATTGGAGGGAGCGGGTTTGAAGATATCGCAGGTAGCGGCAGTGGCGGCGATGGCAGGGGGAGTGAAGGTGGAGCTTTCGGAGGCGAAGAGGGAGGGAGTGAAGGCGAGTAGCGATTGGGTGATGGAGAGTATGGCGAAGGGGACGGATAGTTATGGGGTAACCACCGGGTTTGGTGCCACTTCCCATCGGAGGACCAAGCAGGGTGGCGCACTGCAGAAGGAGCTCATCAGATTCCTTAATGCTGGAATCTTCGGC…	MENGNGHAPSICLNKDPLNWGAAAESLNGSHLYEVKRMVEEFRNPVVRLEGAGLKISQVAAVAAMAGGVKVELSEAKREGVKASSDWVMESMAKGTDSYGVTTGFGATSHRRTKQGGALQKELIRFLNAGIFGSGRESGNTLPAPATRAAMLVRINTLLQGYSGIRFEILEAITSLLNTNITPCLPLRGTITASGDLVPLSYIAGLLTGRPTSKAVCNDGTQIDASKAFELAKIPSGFFELQPKEGLALVNGTAVGSGLASTVLFEANILAVLSEIISAVFCEVMQGKPEFTDHLTHKLKHHPGQIEAAAIMEHILEGSSYMQMAKMIHDPDSLQKPKQDRYALRTSPQWLGPQIEVIRSATKSIEREINSVNDNPLIDVSRNKALHGGNFQGTPIGVS…
		c23044.graph_c0	ATGCTCTCCCTCACCCACTCGCTGCTCGCCTCCACCCCATCCCTGGCCGCCTCCGACAGCTCCACGCTCACCGTAGAAGCTACCGCCGCCACCGCCGCCACCTGGGAGATCTTGAGATCCGCCCCCTCAAGCCTCACCGTCGAGCACCGGTACTCCTCCACCATCCGCTTCACCTCGTCAAGGTGGCTCCCCGTCAAGGCTTCGGCTGCGGCACCCCAGTTGAGAGGGTCCTTGTTGAGACATATAAGACTAGAAGGGGAAGAAACATGGCCATTGCCATTAATCTCCATTTTCTCTTCTCTCCCTCTTATTTTT	MLSLTHSLLASTPSLAASDSSTLTVEATAATAATWEILRSAPSSLTVEHRYSSTIRFTSSRWLPVKASAAAPQLRGSLLRHIRLEGEETWPLPLISIFSSLPLIF
		c35872.graph_c1	ATGGAGCACATTCTGGAAGGGAGCTCGTACATGCAGATGGCCAAGAATGCTCACGAGCTCGACCCGCTTCAGAAGCCTAAGCAGGATCGCTACGCCTTACGGACCTCCCCGCAATGGCTGGGTCCACAGATCGAAGTGATACGCTCGTCGACCAAATCCATCGAGCGCGAGATCAATTCAGTCAACGACAATCCACTGATCGACGTGTCGAGAAACAAGGCTCTCCATGGAGGTAACTTTCAGGGGACGCCGATTGGGGTCTCGATGGACAACACCCGACTCGCCATAGCTGCCATAGGAAAGCTCATGTTTGCACAACTATCCGAGCTCGTCAATGATTTCTACAACAACGGGCTACCGTCAAATCTCTCCGGTGGGCGGGACCCTAGCTTGGATTAT…	MEHILEGSSYMQMAKNAHELDPLQKPKQDRYALRTSPQWLGPQIEVIRSSTKSIEREINSVNDNPLIDVSRNKALHGGNFQGTPIGVSMDNTRLAIAAIGKLMFAQLSELVNDFYNNGLPSNLSGGRDPSLDYGFKGAEIAMAAYCSELQYLANPVTNHVQSAEQHNQDVNSLGLISSRKTAEAVEILKLMTSTFLVALCQAIDLRHLEENFKQAVKNTVSQVSKRVLTTGTAGELHPSRFCEKELVKVIDREYVFAYIDDPCSYAYPLMQKLRQVLVEHALSNGEKEKDANTSIFQKIAAFEEELKATLAKEVKAARVSVENGSAPIANRIKECRSYPLYRFVREELGARFLTGDKVASPGEEFDKVFVGICEGKVIDPMLECLKEWNGAPLPIC
		c37719.graph_c0	ATGGCATGCGACAACGGTAGCGGCAATGCCAACGGTTTCTGCATCCGGGACCCGCTGAACTGGGGTGCGGCTGCGGAAGCCCTGACCGGCAGCCACCTCGACGAGGTCAAGAGAATGGTGAAGGAGCACCGAGAGGCGTGCATCAAGCTCGAAGGAGCGACGCTGAAGGTGGCCCAGATCGCCGCGGTCGCCAACGGAGGGTCCGCGGTCAAGGTCGAACTGGACGAGTCCGCACGGGCCCGTGTCGGGGCCAGCAGTGATTGGGTGATGGACAGCGTGAGTAAAGGGACCGACAGTTATGGTGTGACTACTGGTTTTGGTGCTACCTCTCATAGGAGGACCAAGCAAGGAGGCGCCCTTCAAAACGAGCTTATTAGATTTTTGAATGCTGGGATATTC…	MACDNGSGNANGFCIRDPLNWGAAAEALTGSHLDEVKRMVKEHREACIKLEGATLKVAQIAAVANGGSAVKVELDESARARVGASSDWVMDSVSKGTDSYGVTTGFGATSHRRTKQGGALQNELIRFLNAGIFGAGRDSFNTLPASTTRAAMLVRINTLLQGYSGIRFEILEAITRLLNSNVTPCLPLRGTITASGDLVPLSYIAGILTGRPNSKATAPDGTHIDASEAFRLAGITGGFFQLQPKEGLALVNGTAVGSGLASTVLYDANILAVLAEVSSAIFCEVMQGKPEFTDHLTHKLKHHPGQIEAAAVMEHILAGSSYMKMAEKLHELDPLQKPKQDRYALRTSPQWLGPQIEVIRSATKSIEREINSVNDNPLIDVSRNKALHGGNFQGTPIGV…
	C4H	c37762.graph_c0	ATGGATCTCATACTACTAGAGAAGTCCCTCCTCGCCGTGTTCTTCGCCATCATCCTCAGCATCTTAATCTCCAAACTCCGCGGGAAGAAGCTCAGGCTCCCTCCCGGCCCGCTCCCAGTCCCCGTATTCGGGAACTGGCTCCAGGTCGGCGACGACCTCAACCACCGCAACCTCGCCTCCCTCGCCAAGAGATTCGGCGACATATTGATGCTGAGAATGGGTCAGCGGAATCTCGTGGTCGTGTCGTCGCCCGAGCTCGCCCGCGACGTCCTGCACACGCACGGGGTCGAGTTCGGGTCGCGGACGAGGAACGTCGTCTTCGACATATTTACCGGCAAAGGGCAGGACATGGTTTTTACAGTGTATGGTGAGCACTGGCGCAAGATGCGCCGGATCATG…	MDLILLEKSLLAVFFAIILSILISKLRGKKLRLPPGPLPVPVFGNWLQVGDDLNHRNLASLAKRFGDILMLRMGQRNLVVVSSPELARDVLHTHGVEFGSRTRNVVFDIFTGKGQDMVFTVYGEHWRKMRRIMTVPFFTNKVVNQYRFGWEDEAGRVVEDVKKDSLAATAGIVLRKRLQLMMYNNMYRIMFDRRFESEEDPLFLRLKALNGERSRLAQSFEYNYGDFIPILRPFLRGYLKICKQVKEKRLQLFKDCFLEERKKLASTKPADNAGLKCAIDHILDAEKKGEINEDNVLYIVENINVAAIETTLWSIEWGIAELVNHPNVQQKLRNELDAVLGPGVQITEPDTYHLPYLQAVIKETLRLRMAIPLLVPHMNLYDAKLGGYDIPAESKILVN…
	4CL	c34579.graph_c0	ATGGGCTCCATTCCTTCGGACAGCGAGACCATCTTCCGATCGAAGCTCCCCGACATTTACGTCCCCGACCACCTCCCCCTCCACTCCTACTGCTTCCAGAACCTCCACCAGTTCTCCGACCGCCCCTGCCTCATCGACGGCTTCACAAACAAGGCCCTGACTTACGCGGAAGTCGAGCTCGCCTCACGACGAGTCGGGGCCGGTCTCCACCGCCTCGGCCTCAGGCAAGGGCACGTCGTCATGCTCCTCCTTCCCAACTCCGTCGAATTCGTCTTGTCCTTCATCGGCGCGTCGTTCCTCGGCGCCATGTCGACCACGGCCAATCCGTTCTACACCTCTGCCGAGATTCACAAGCAGGCAGCCGCGGCCGGCGCGAAGATCATCATAACCGAGTCGTGC…	MGSIPSDSETIFRSKLPDIYVPDHLPLHSYCFQNLHQFSDRPCLIDGFTNKALTYAEVELASRRVGAGLHRLGLRQGHVVMLLLPNSVEFVLSFIGASFLGAMSTTANPFYTSAEIHKQAAAAGAKIIITESCHVGKLRGLEGISRIVVIDADDAVPVAENVVHFSELECADEAELPRVDISPGDVVALPYSSGTTGLPKGVMLTHNGLVTSVAQQVDGENPNLYFSEEDVLLCVLPLFHIYSLNSVLLCGLRVGAAIVLMRKFEIVRLMEVVEKYRVTIAPFVPPIVVEMAKSEAVDRYDLSSIRVVMSGAAPMGKELEDKLREKLPNAKLGQGYGMTEAGPVLSMCLAFAKEPFEVKSGSCGTVVRNAELKIIDPDTGFSLSRNQPGEICIRGNQIM…
		c34423.graph_c2	ATGGCGAAATCTTGCTACAACCCTAACAATGGCCTCTACACCTCCCCTCGCCCTCCCCTTCCCTTCCCCACAGACCCTAACCTCTCCATGATCCCATTCCTCTTCCGCAACGCTCACCTCTACCCCGGCCGCATCGCCCTCGTCGACGCCGTGACCGGCGACTCCCTCTCCTTCGCCCAGCTCCGATCCACCGTCTCCTCCCTCGCCGCCGCCCTCTCTGCCGAGTTCCGAATCAAGAAGGGTGACGTCATCCTCATCTTCGCTCCCAATTCGATCCTCTTCCCCATCTCCTTCCTGTCGATCCTCGCACTCGGCGCCGTCGCCACCACCGTCAACCCCCTCTACACCGTTCCCGAACTATCCAAGCAGATCAAAGATTCGAGCCCCAAGCTGATCATC…	MAKSCYNPNNGLYTSPRPPLPFPTDPNLSMIPFLFRNAHLYPGRIALVDAVTGDSLSFAQLRSTVSSLAAALSAEFRIKKGDVILIFAPNSILFPISFLSILALGAVATTVNPLYTVPELSKQIKDSSPKLIITVQSLFDKVRGFDLPTIFLTPKKSDIGGGKVWFFEDLVKKAPLSEFTPPAVGMNDTAALLYSSGTTGVSKGVVLSHRNFVTAAMMVVSDQDLRGEPENTFLCLVPMFHIFGLSVITFGQLARGNRVVVMERYEMDLMLRSVERFGVSYLYVVPPIMIALAKMGKVEKYDVSSLRLLGSGAAPLGKDVMEEVSRVFPRAEIVQGYGLTESCGIISLEFF
		c32428.graph_c0	ATGGTCCAATCCATGGCTTGTGGGCTTCAAAAGCTTGGGATTCTACAAAACCAGGTAGTTCTCATTCTTCTTCCCAATACAATCTTGTACCCTGTTGTATTCTTGGGTCTTCTTTCAATTGGCGCTATCGCCACTACCATGAATCCACTCTGTAGTGGGGAAGAGATCGAAAAGTCGATGAAAGGTTGTAACTTGGTTGGTGTATTTACAACTAGTGATAATCTGGCAAAAGTTGATGGACTGGGAGTTGTGGTTGTTCAAGTGCCCCAAAATATCAATTTTGATGCAGAGAAGTTCTCTCTGTTCAGTAGGATAATTTCGTCCGACCCCAAAGAGTTGATCGAACCTAAAATTAGGCAAACCGATACGGGTGCCATACTCCATTCTTCAGGTACGTCG…	MVQSMACGLQKLGILQNQVVLILLPNTILYPVVFLGLLSIGAIATTMNPLCSGEEIEKSMKGCNLVGVFTTSDNLAKVDGLGVVVVQVPQNINFDAEKFSLFSRIISSDPKELIEPKIRQTDTGAILHSSGTSGSSKGVVLTHGNLIAAIELFVRFEASQYKERSWENVYLAALPMFHVYGLSLFVMGLLSLGSMVVVMRRFDVEEVVRAIDLYKVTHFPVVPPILAALGRAVYENGCELRSLKQVSCGAAPASKKLIEDFVKIFPHVDFVQGYGMTESTAVGTRGFNTKKFKKHTSVGLLAPNMQAKLVDCKDGANLAPGKSGELYLKGPGIMKGYLNNEQATSSAIDRDGWLRTGDVAYFDQDGYLYVLDRLKDTIKYKGFQIAPADLEAVLISHPE…
		c23093.graph_c0	ATGCTGACTCACCGTAAGCTCGTCTCCAACCTCTACTCATCCCTCTTTAGCGTTAGCGAAGAAATGATAGGCCAAGTCTGCACATTAGGCCTCATGCCATTCTTCCACATTTATGGTATAACTGGTATTTGTTGTTCTGCGTTGAGGAACAGAGGGAAGGTGGTGGTGATGGGGAGATTCATTCTTAGAAGCTACCTCAAAATACTGACTAAGCACGAGGTGAATTTTGCACCGATCATGACCGCGATAATTCTGGTAATAGTGAAGAGCCTATTA	MLTHRKLVSNLYSSLFSVSEEMIGQVCTLGLMPFFHIYGITGICCSALRNRGKVVVMGRFILRSYLKILTKHEVNFAPIMTAIILVIVKSLL
		c38760.graph_c0	ATGCACATTCAAAGCCAAAACAAAGAGAATAGAGAGGAAATGGAAAGTGGCTTCAACCCCTTCACTTCCATCTACAAAACTACATACCCTTCCTCACCTTCCATCCCTCACTCTCCCACCCTCTCTCTCCCACACTTCCTCCTCTCCCTCCTCCCTTCTCCTCCCTCGAAGCCCGCATTCATCGACGCCATCACGGGCGAATCGCTCACCTACTCGTCTCTCCTCAAGCTCACCGTTTCAATGGCAAACTCCCTTCGTTCCTTAGGCGTCGGGCGCGGGGATGTAGTGCTGTTCTTGTCTCCAAACTCCCTCCATTTCCCCGCCCTATCCCTCGCGATCCTATCCCTCGGAGCCATATTCTCCCCCGCCAACTTCCTCCACACCCGCTCCGAGCTCTCG…	MHIQSQNKENREEMESGFNPFTSIYKTTYPSSPSIPHSPTLSLPHFLLSLLPSPPSKPAFIDAITGESLTYSSLLKLTVSMANSLRSLGVGRGDVVLFLSPNSLHFPALSLAILSLGAIFSPANFLHTRSELSIQIQDSSPSLVMATADLYEKVQGLGRILIIEPFLASLATNPAPIPVRIEQSDVAALMYSSGTTGKSKGVRCTHGNLIAMAAVLRHVWGAGPSSSSPHVYACVVPLFHMFGFSVFICGAIAAGATVVIMRKYNLEDVLIAVEEHRVTRMPAVPPMVVQMVRSGDVVRGYDIGSLKEVICSGAPLAREHMESFVERYPHITLTQCYGLTETSGPITLCDGVKSRYHTSIGRLIPSIEAKIIDIRTGKSLPPNKFGELRVRGPPIMQGY…
		c31676.graph_c2	ATGGGGAAGGAGCTGGAGGAGAAGCTCAGGGAGAAGTTGCCCGATGCCAAGCTTGGCCAGGGTTATGGAATGACCGAAGCGGGGCCGGTTCTTTCCATGTGTCTAGCATTTGCTAAGGACCCGTTTGAAGTGAAATCCGGTTCGTGTGGTACGGTTGTCAGGAATGCGGAGCTAAAAATCGTGGATCCGGACTCTGGCTTCTCGCTCAGTCGGAACCAAGCGGGAGAGATTTGCATTAAGGGAAATCAGATCATGAAGGGATATCTGAACAATCTGGAGGCGACCGAACAAACCATCGACAAAGATGGGTGGTTGCACACAGGAGACATCGGATTCGTGGACGACGACGACGAAATATTCATCGTCGATCGGCTCAAAGAGCTCATCAAGTACAAAGGA…	MGKELEEKLREKLPDAKLGQGYGMTEAGPVLSMCLAFAKDPFEVKSGSCGTVVRNAELKIVDPDSGFSLSRNQAGEICIKGNQIMKGYLNNLEATEQTIDKDGWLHTGDIGFVDDDDEIFIVDRLKELIKYKGFQVAPAELEAMLITHPSIADAAVVPMKDVSCGELPVAFIVRSNGSEITEDEIRKYISKQVVFYKRIHRVFFVEALPRAPSGKILRKELRAKLAAEYPNGLQP
		c33953.graph_c0	ATGTCTTCTTCTCCATCTTCCCTCGACCCAAGAAGCGGTTTCGACCCGAAAACCAAAACCTTCCACTCTCTCCGGCACCCAACACCTCTCCCTCCCCTCTCCCAACCCAACTCCGTCACCTCCTACGTCCTCTCCCTCCTCCCTTCTCCTCTTCCTTCGTCCCCCGCCTTCGTCGATTCTTCCTCAAACCTCTCCATCTCCTTCCCCCAATTCCTCGCCCGAATCAACTCCCTCTCCTCCGCCATTAGGACCCACCTCCCAGCTCTATTCACCAAATCCCACCCCGTCGCTTTCATCCTTTCCCCCTCCTCCCTCGACATCCCCGTTCTCTACTTCTCCCTCCTCTCCCTCGGCGTCGTCATCTCCCCTTCCAACCCCCTCTCCTCCCCTTCCGATGTC…	MSSSPSSLDPRSGFDPKTKTFHSLRHPTPLPPLSQPNSVTSYVLSLLPSPLPSSPAFVDSSSNLSISFPQFLARINSLSSAIRTHLPALFTKSHPVAFILSPSSLDIPVLYFSLLSLGVVISPSNPLSSPSDVSHQISLSNPTVAFATTSTASKLPSNIPVVLIDSDRFRSWCDGRIATEPAAGAVLQTDPAAILYSSGTTGRVKGVELTHRNFIAIVAAFKAMDDPTQHPQINLFTLPLFHVYGAFMVMRNVALGCTTVLMGRFEFERMLQAVERYRVTMMPVSPPLVVALAKSELVEKYDLSSLVALGCGGAPLGREVAEKFKERFPNVDISQGYGLTESAGGVVGMVDPEECKVWGSAGRLGSNMEAKIVDPLTGETLGPGQQGELWLRGPTLMKG…
		c38303.graph_c0	ATGGACAATTTTACTCTCACAGAAACTCTAAGAAAGTCCGCCGCCAGTTTCCAATCGCGGCGAGCTCTCTTCGTCCCAGGAAAGATCGACATCTCGTACTCTCAGCTCCACGATCTCGTCGAGAACGCAGCCGCAAAACTGATCGCCGCCGGCGTCGGTACTGGTGACGTCATTGCCCTCACCTTTCCAAACACCGTCGAGTATGTGATCCTGTTCTTGGCCGTGATCCGAGCAAGGGCGACGGCTGCGCCCCTAAACGCGGCGTACACCCAAGAAGAGTTCGAATTCTACCTCTCCGACTCCGAATCCAAGATCCTCTTCACCGACGCTAAAGGGAATCCGGCCGCCGAAGCTGCCGCCTCGAAGATTGGGATCCCCAGCGCCACTGCCAAGCTGAAC…	MDNFTLTETLRKSAASFQSRRALFVPGKIDISYSQLHDLVENAAAKLIAAGVGTGDVIALTFPNTVEYVILFLAVIRARATAAPLNAAYTQEEFEFYLSDSESKILFTDAKGNPAAEAAASKIGIPSATAKLNHLNTIEIEISLPINLSDLNDSDILLNDVASDSDDVALFLHTSGTTSRPKGVPLTQRNLAASVRNIGFVYRLTERDSTVIVLPLFHVHGLIAGLLSSLSVGAAVTLPASGRFSASTFWSDMIASSATWYTAVPTIHQILLDRHATKPESSYPKLRFIRSCSASLAPTILFRLEESFGAPVLEAYAMTEASHLMASNPLPEDGPHKPGSVGRPVGQEMAVLDAEGKAVDADVAGEVCIRGENVTKGYKNNAEANRAGFLHGWFHTGDV…
		c38257.graph_c0	ATGACCACCATCGCCGAATCGCACCCGCAAATCCACCACTCACCGCCCGATACCACCGCACCCTCCACCCCGCCCACCGCCACCATCTTCCGGTCCCGACTCCCCGACATCGCCCTCTCCAACCAGCTTCCCCTCCACGAGTACGTCTTCGAGAACACGCTGACGTCGGCGTCCCCCTGCATCATCTCCGCCTCCACGGGTCGGTCCTACTCCTTCGCGGAGACCCACCTCCTCTCCCGAAAGACCGCCTCCTTCCTGTCCTCCCGATGCGGAGTCCGAAGAGGTGGAGTCGTCATGCTCCTCCTCCACAACTGCCCGGAGTTCGTGTTCTCGTTCCTCGGCTCCTCCATGCTCGGCGCCGTCACCACCGCCGCCAACCCCTTCTGCACTCCTCAGGAG…	MTTIAESHPQIHHSPPDTTAPSTPPTATIFRSRLPDIALSNQLPLHEYVFENTLTSASPCIISASTGRSYSFAETHLLSRKTASFLSSRCGVRRGGVVMLLLHNCPEFVFSFLGSSMLGAVTTAANPFCTPQEIKKQLLASGATVIITQSAYASKISRDNVVVVTVSDNELESHATPPEGCVSFSEVESAEEEDLPAAVAVGPEDAVAMPFSSGTTGLPKGVVLTHKSMTSSVGQIVDGENPNLHLRKGEDVLLCVLPLFHIFSLNSVLLCGLRTGAAVVIMARFEMERMLETVQRWGVSVVAVVPPLVLALAKNPLVEKYEMGTVRMVLSGAAPLGKELEAALKGRLPQAVLGQGYGMTEAGPVISMCPGFAKQPTPAKSGSCGTVVRNSELKVMDPE…
		c21888.graph_c0	ATGCAGATTTCGGTATCGAGTCCACAAAATGCACCTCTCTCACTCTCTTATATGATGCAACGTTGGATGCCACATAATCCATTATCTCTTTTCCGCTTTCCTTCGCACTTTTATTCATCACGATACAGGCTGCAGGTTTTTCCCCAGCTTCCTCATCAGGCAACCCAAAGACGGAAACATCATCAACTGAGGGATGGGAGAGAAGGATGGCTTCTAATT	MQISVSSPQNAPLSLSYMMQRWMPHNPLSLFRFPSHFYSSRYRLQVFPQLPHQATQRRKHHQLRDGREGWLLI
		c36335.graph_c0	ATGGCAGCATCAAACTCCTCCATCGATCCCCGAAGCGGATTCTGTAGATCCAACTCCACCTTCTACAGCAAGCGCAAGCCCGTCCCCCTGCCCGCCGACCCGGACCTTGACGTAGCCACCTTCATCACCACCCGCCGCCACACCGGTAAGGTCGCCCTCATCGACGCCTCCACCGGCCGCCACGTCACCTTCCCCCAGCTCCACTCCGCCGTCTCCTCCGTCGCCTCCTTCCTCTCCTCCCGCCTCCGCGTCCGCAAGGGCCACGTCATCCTCCTGCTCTCCCCCAACTCCATCCACTTCCCCGTCGTCTCCCTGGCCGTCATGTCCCTCGGCGCCGTCCTCACCACCACCAACCCCCTCAACACCCCCCGCGAGATCTCCAAGCAGGTCTCCGACTCG…	MAASNSSIDPRSGFCRSNSTFYSKRKPVPLPADPDLDVATFITTRRHTGKVALIDASTGRHVTFPQLHSAVSSVASFLSSRLRVRKGHVILLLSPNSIHFPVVSLAVMSLGAVLTTTNPLNTPREISKQVSDSNPVLAFTTSFLIEKIPDHLPVVLLDQESSIRTPSSRIVATIEEMVNTEPDPRRVKERVTQDDTATLLYSSGTTGTSKGVVATHRNLIAMVQVILNRFRLEEGGVEPETFICTVPMFHVYGLAAFATGLLGSGSTIVIMSKFEMGDLLEAINRYRATYLPVVPPILVAMVNHSKRLPLGTLRRVLSGGAPLSKEVIEGFLEKYPNVEILQGYGLTESTGIGASTDSAHESKKYGTAGMLSANTEARIVDTETGRFLGMNETGELWIR…
		c22889.graph_c0	ATGTCGACTACTGCCAATACATTCTACACATTTGTTGAGATTCACAAGCGGGCCGCTGTGGCTGGTGCGAAGATCGTTGTAACCGAGTCGTGCCACGTCAGCAAGCTCCAAGGCTTGGAAGGGATCTCGAGAATCGTCGTCATTGACGATGCGGTTCCGGTTCAACAGAATGTCATGCATTTCTCGGAGTTGGAGTCTGCGGACGAGGTGGAGCTCCCGAGGATCAACATAAACCCTAACGATGTCATAGCGCTTCCGTACTCATCTAGGACCACCGGTCTCCCAAAAGGTCTTGTTTGCTTTAATGTTGCCTTCCACACAACATCAATC	MSTTANTFYTFVEIHKRAAVAGAKIVVTESCHVSKLQGLEGISRIVVIDDAVPVQQNVMHFSELESADEVELPRININPNDVIALPYSSRTTGLPKGLVCFNVAFHTTSI
	C3H	c35438.graph_c0	ATGGATTTATCTCCTCTTTCAATCTCCATAACCGTCTTCTCTCTCCTCATCTCATTCCTCCTCTTCAAGAAGTTGACCACCAAACTGCCTCCGGGCCCGAAGCCATGGCCGGTGGTGGGCAACCTCTACGACATAAAGCCGGTCCGGTTCAGGTGCTTCGCCGAGTGGGCCCAAACCTACGGCCCCATCATGTCCGTCTGGTTTGGGACAACCCTCAACATTGTCGTCTCAAGCTCAGAGCTGGCGAAGGAGGTGCTGAAGGAGAAGGACCAGAGCCTGGCCGATCGCCCGAGGAACCGGGCTACTGCCCGGTTCAGCAGGGATGGGAAAGATTTGATCTGGGCAGATTACGGGCCCCACTACGTGAAGGTGAGGAAGGTCTGCAATCTTGAGCTCTTC…	MDLSPLSISITVFSLLISFLLFKKLTTKLPPGPKPWPVVGNLYDIKPVRFRCFAEWAQTYGPIMSVWFGTTLNIVVSSSELAKEVLKEKDQSLADRPRNRATARFSRDGKDLIWADYGPHYVKVRKVCNLELFSQKRLEGLRPIREEEVTAMVEAIFRECTQQDKIGNSLVVRNHLSGVAFNNITRLAFGKRFMNSEGVMDEQGLEFKAIGANGVKIGASLSLGEYVTWLKWMFPFDEEAVAKHGARRDRLTRAIMEEHTRARKESGARQHFVDALLTLQEKYDLSEDTIIGLLWDMITAGMDTTVITVEWAMAELVKHPRVQEKVQEELDRVIGVDRIMTESDFPNLHYLHCVVKEALRLHPPTPLMLPHKASANIKIGGYDIPKGAVIHVNVWAIAR…
	C3'H	c35438.graph_c0	ATGGATTTATCTCCTCTTTCAATCTCCATAACCGTCTTCTCTCTCCTCATCTCATTCCTCCTCTTCAAGAAGTTGACCACCAAACTGCCTCCGGGCCCGAAGCCATGGCCGGTGGTGGGCAACCTCTACGACATAAAGCCGGTCCGGTTCAGGTGCTTCGCCGAGTGGGCCCAAACCTACGGCCCCATCATGTCCGTCTGGTTTGGGACAACCCTCAACATTGTCGTCTCAAGCTCAGAGCTGGCGAAGGAGGTGCTGAAGGAGAAGGACCAGAGCCTGGCCGATCGCCCGAGGAACCGGGCTACTGCCCGGTTCAGCAGGGATGGGAAAGATTTGATCTGGGCAGATTACGGGCCCCACTACGTGAAGGTGAGGAAGGTCTGCAATCTTGAGCTCTTC…	MDLSPLSISITVFSLLISFLLFKKLTTKLPPGPKPWPVVGNLYDIKPVRFRCFAEWAQTYGPIMSVWFGTTLNIVVSSSELAKEVLKEKDQSLADRPRNRATARFSRDGKDLIWADYGPHYVKVRKVCNLELFSQKRLEGLRPIREEEVTAMVEAIFRECTQQDKIGNSLVVRNHLSGVAFNNITRLAFGKRFMNSEGVMDEQGLEFKAIGANGVKIGASLSLGEYVTWLKWMFPFDEEAVAKHGARRDRLTRAIMEEHTRARKESGARQHFVDALLTLQEKYDLSEDTIIGLLWDMITAGMDTTVITVEWAMAELVKHPRVQEKVQEELDRVIGVDRIMTESDFPNLHYLHCVVKEALRLHPPTPLMLPHKASANIKIGGYDIPKGAVIHVNVWAIAR…
	COMT	c30844.graph_c0	ATGGCTTCATCCTTACCTCCTCCTCCCTTGTCATCACCATCATCCAAACAATCAAATAAGGAAGCTCGCCTCGCTATAATGGAGCTCTCCAACATGCTCTCCGTCCCCATGGCTCTCACCGCCATCGTCCGCCTCGGCGTCCCCAACATCCTCTCCCTTCACTCCCCAACCCCTCTATCCCCTTCCCAGATCCTCTCCCTCTCCAATAGAAACTCTACGCCAAACCCTAACGCTGTGCTCAACCTCCAGCGCCTCCTCCGCCTTCTTTCCTCCCACGGCATCTTCCACGAGCTCATCTCCTCCTCCGACGGCACCAGCACCCACCTCTACTCCCTCACCGAGATCGGAAAAACCCTCGCGGACGACGAGCAGGGCAACTCCTTCGCCGCCTACGTGCTC…	MASSLPPPPLSSPSSKQSNKEARLAIMELSNMLSVPMALTAIVRLGVPNILSLHSPTPLSPSQILSLSNRNSTPNPNAVLNLQRLLRLLSSHGIFHELISSSDGTSTHLYSLTEIGKTLADDEQGNSFAAYVLQHHQDSLMRSWSFLHGAVTDPEGDEPFKKANGVSAYEYYTKDEADNELMRRAMWGVSVPFMEEFLDGYATEGGFDGVGTLVDVGGSSGACLRMVMERVEGIEVGVNFDLPDVISGAPEFPGIIHVGGDMFKFIPQGDAIFMKWILTTWTDEECEQILRNCYDALPEGGKVIACEPVVPKETDDSRRTRALLAGDIFVMTIYRTQGKERTEEEFRKIGISAGFPKFRAMYNFDHFYAVLEFQK
		c34620.graph_c0	ATGGGTTCAACACAAAATGGCATCCCACAAGCTCCCCACTCAACAGATGAAGAAGCATGCATGTTTGCCATGCAGCTCACAAGCTTCTCAGTCTTACCCATGACTCTGAAAGCAGCTGTCGAGCTTGACCTCTTCGAGATAATAGCGAAGGCTGGGCCTAATGCTTATCTTTCGCCGAGTGAGGTTGCGAGCCAACTGCCTGCTAATAAGAACCCACAGGCTGCAGTCATGCTGGACAGGATCATGAGGTTGTTGGCCAGTTACAACATCTTGACCTGCAGTGTTGAGACAGAGAATGTCGAGGATGGGAGAATCGAGAGGAGGTATGGAGCTGCACCTGTTGTCAAGTATCTGACCAGAAATGAGGATGGGGTTTCAATGGCTGCTCTTGGTCTCATG…	MGSTQNGIPQAPHSTDEEACMFAMQLTSFSVLPMTLKAAVELDLFEIIAKAGPNAYLSPSEVASQLPANKNPQAAVMLDRIMRLLASYNILTCSVETENVEDGRIERRYGAAPVVKYLTRNEDGVSMAALGLMSQDKILMESWYHLKDAVLDGGIPFNKAYGISAFEYHGTDPRFNRVFNEGMRNHSTIITKNILETYKGFDDLKVLVDVGGGVGGTINMIVKKHPHLKGINFDLPHVISEAEPIPGVEHVGGDMFESVPSGEAIFMKWILHDWSDEHCLKLLKNCWKALPDNGKVILMESILLEYPEPTTASQGMIHADMIMLALNPGGKERTEKEFNALAKKAGFSTSKVICGFANSCVIEFYK
		c23510.graph_c1	ATGGGATCGTGCAATATTAATGACGATGAGGCATTCACATATGCAGCTCAACTTCTCAGCCTCTCTGCGCTCCCCATGACTCTCGCTGCTGCCGTCGAGCTCGATCTTTTTGATATAATCACCAAGGCAGGCCCCGATGCATACTTATCCGTGTCGGAGATAGTGGCGAAATTACCGACGCAGAACCCGCAAGCATCGGAAGTTGTTGATCGGATGCTGAGGATGCTTGCTGGCTTTGATGTCGTGACATTAAAATCTTTGAGGACGGGTGAGGCTAGTGGAAGGATGGAAAGGCGATATGGGGCGAATGAGGTCACAAAGTATTTCTGCAAGGATGAGGGTGAGGGAGGTTGCTCCCTTGCTCCGGGCTCTAAGTTATTCCATGATCATACTACCATG…	MGSCNINDDEAFTYAAQLLSLSALPMTLAAAVELDLFDIITKAGPDAYLSVSEIVAKLPTQNPQASEVVDRMLRMLAGFDVVTLKSLRTGEASGRMERRYGANEVTKYFCKDEGEGGCSLAPGSKLFHDHTTMEAWYNLKNAVLDGGDPFSKAHGMNIFEFAKANPRFNSLFNEAMKGYSRISMKMILDVCTAAFDHLNVLVDVGGGTGATLCTVIARHPHIKGINFDLPHVIREAPSLPGIVHIGGDMFESVPSTGDAILLKTLCCDWDDEHVLKILKNCWKALRDNGKVIIINEMLPMIVEGKPSTSLEKYSLLADLLDLVLVPSGKVRSEEEFENLSKSAGFSRFARVGTCADVTIMECYK
	F5H	c26398.graph_c0	ATGGATGAAATCCAATATCTTTATCCCCTCCTCCTAACATTTCTCCTCTTCAAGCTCTTCAAGACCCTGCTAAGCCCTAAACTCAGGCTGCCTCCCGGCCCTCGAAAGCTACCGATCATCGGTAACTTACACAACCTCCGACGCTCCCAACTCCCTCATCATGCCCTAAAAGACTTGGCCGAACTTTACGGACCCCTCATGCACTTGAAACTCGGAGAGGTCTCTACCATAGTAGTCACCTCCGGTGCGGTGGGAAAGGAGATTTTAAAGACCCACGACCGTAATTTCTCGTCTAGGGCAGATAACCTCGCGGTTAAGATCATGCTTTACGATGGCGCAGACATGGTTTTCTCGCCCTACGGGGATTTTTGGAGGCAGCTAAGAAAACTCTTTGTCACC…	MDEIQYLYPLLLTFLLFKLFKTLLSPKLRLPPGPRKLPIIGNLHNLRRSQLPHHALKDLAELYGPLMHLKLGEVSTIVVTSGAVGKEILKTHDRNFSSRADNLAVKIMLYDGADMVFSPYGDFWRQLRKLFVTELMSAKRVQSFQPIREQEALNSVRMISAARGEVNLTELLHSYTNNVTARVAFGNRCEDGEMFSREVKKSVELASGFMAADLFPSWASIIGLVNGMKGKLEKCHRNVDMVLEKIIEEHKERRGREVNGDDVIVEENFLDVLFKLQAKSGLGFKLTSTNIKAIIFDVFGAGSGTSASSMTWTMSELMRNPRVMKKAQAEVRHVVNARPKITESDIKRLTYLRLVIKESLRLHPPAPLLVPRESTEKCEIQGYDIPAKTKVVFNAWAMG…
	CCR	c13600.graph_c1	ATGGAAGGTGCTGCAGAGAGGCTGATACTCTGCAGGGCTGATTTGTTGGACTCCGATGCTCTGCGTGCTGCAATCGATGGGTGCGTCGGTGTTTTTCACACTGCATCACCCATTACTGATGATCCTGAACTGATGGTGGAGCCTGCGGTTACGGGGACAAAGTACGTGATAGATGCAGCTGCCGAAGCTGGAGTCCGGCGTGTCGTATTCACGTCGTCGATTGGTGCGGTCACCATGGACCCAAATCGTGGACCTGACGTGGTCGTCGACGAGTTGTGCTGGAGTGATCTTGAGTTCTGCCAGAACACCATGAATTGGTATTGCTATGGCAAGGCGGTGGCAGAGCAAGCAGCATGGGAGTCGGCTGCAAAGAGAGGGGTCGACCTAGTCGTCGTCAAC…	MEGAAERLILCRADLLDSDALRAAIDGCVGVFHTASPITDDPELMVEPAVTGTKYVIDAAAEAGVRRVVFTSSIGAVTMDPNRGPDVVVDELCWSDLEFCQNTMNWYCYGKAVAEQAAWESAAKRGVDLVVVNPVVVLGPLLQPALNASATHILKYLNGSAKTYANAVQAYVHVRDVAEAHVRVFEAREARGRYLCAESVLHRGDVVRILAKFFPEYPIPTKCSDEKNPEKQPYKLSNQKLRDLGLEFTPASQCIYETVKSLQEKGHLPMIPSETQTALQI
		c26859.graph_c0	ATGACACCTAACTGGCCGCAAGGTAAGGTTATGGATGAGGATTGTTGGTCGGATCTTGAATACTGCAAGACAACTGAGAACTGGTATCGTGTTTCAAAGACAATGGCGGAGAAGGAGGCTCTGATCTACGCAGAAAAACATGGGCTTGATGTTGTTACGGTTTGTCCATCTACAGTTTTGGGCCCTCTGCTCCAATCTACTGTGAATTCTAGCAGCTTGTTTCTTCTCAAAATCTTGACAGGAAAGCACGAGTCGATGGAGAACAAGATGATGCATTTTGTGGATGTTCGTGACGTG	MIASLSKIKFVTKYPLPTC
		c28502.graph_c0	ATGGAGAAATCAGAAGAGGAGAAGAAGAGAGTTTGTGTGACTGGTGCAGGTGGATTTATTGCATCGTGGCTCGTCAAGGTCTTGCTCTCCAAAGGCTACTTGGTCAATGGCACTGTTAGAGACCCAAGTGCTGAAAAGAATGCTCATTTGAAGAGGTTAGATAAAGCCTCAGAAAACCTGCAACTTTTCAAGGCAGACTTGCTTGACTATGATTCAGTGGCTGCAGCTATTGCAGGCTGCGAAGGAGTTTTCCATGTTGCCAGTCCTGTCCCTTCAACCAAAGTATCCAACCCAGAGGTAGAAGTAATTGATCCTGCTGTAACGGGCACCCTCAATGTACTTAAAGCATGCTCTGAGGTTAACATCAAAAGAGTAGTTGTGGTTTCCTCTGTTGCTGCA…	MEKSEEEKKRVCVTGAGGFIASWLVKVLLSKGYLVNGTVRDPSAEKNAHLKRLDKASENLQLFKADLLDYDSVAAAIAGCEGVFHVASPVPSTKVSNPEVEVIDPAVTGTLNVLKACSEVNIKRVVVVSSVAAVSMVPNMPQDKIMDEDCWSDNEYCRETENWYCLSKTLAEKEALVYAEKHGLDVVTVCPSMVLGPLLQPTVNASSLFLVNILTGKRESIENRIMHFVDVRDVVDALVLAYEKPEASGRYICAPYPMKVRDFMDMLKSMHPNYHYPKQYPESEKQAICSSEKLKKLGWKCRELKETLVDTVGSYKEAGLLDGE
		c44125.graph_c0	ATGGTTATTGGTCCAATGCTTCAATCTACTGTGAATACTAGCAGCTTGTTTCTCATCAATCTGTTGAACGGTAACTATGAGACGATCGAGAACAAGGTTTGGACTTACGTGGATGTTCGAGATGTAGCTGATGCACTCCTTCTGGTATATGAGAAGCCTGAAGCATCGGGGCGATACATCTGTGCACCACATCCAATTAAGGCCCGAGATTTAGTTGGCATGCTGAAGGGCACGTACCCTGATCTAGCATGCCCAAAGAAATGCATCGACGAAGAAGAAGCCGTGATGACTTCCGAGAAATTGAGGATGTTGGGGTGGGAATGGAGGCCACTGAAGGAAACTCTTGTTGAATCTGTTGAGTTCTATAAGAAGGCTGGTCTATTTAAT	MVIGPMLQSTVNTSSLFLINLLNGNYETIENKVWTYVDVRDVADALLLVYEKPEASGRYICAPHPIKARDLVGMLKGTYPDLACPKKCIDEEEAVMTSEKLRMLGWEWRPLKETLVESVEFYKKAGLFN
		c30311.graph_c0	ATGACTAATGACTCTCAAGAGCTTTCAGGCCACGGCCAGACCGTTTGCGTGACCGGAGCTGGAGGATTCATCGCCTCTTGGCTCGTCAAGCTCCTCCTTGAGAGAGGCTACACCGTCAGAGGAACCGTAAGAGATTCTGAGGACAGTAAGAACTATCATTTGAAAGCTATGGAGGGAGCTGCAGAGAGGCTGACCCTCTGCAAGGCTGATTTGTTAGACCTGGAAGCCCTACGTGCCGCGATCGACCGCTGTGATGGCGTCTTCCACACTGCCTCACCGCTCACCGATGATCCGGAGTTGATCTTAGAGCCAGCAGTGAGGGGGACGAGACATGTGATCGGCGCGGCTGCAGAGGCTGGAGTCCGGCGTGTGGTGTTCACGTCATCCGTCGGTGCCATC…	MTNDSQELSGHGQTVCVTGAGGFIASWLVKLLLERGYTVRGTVRDSEDSKNYHLKAMEGAAERLTLCKADLLDLEALRAAIDRCDGVFHTASPLTDDPELILEPAVRGTRHVIGAAAEAGVRRVVFTSSVGAITMDPNRGPDVVVDESCWSDLEFCKKTQNWYCYAKAVAEQAACDLATEKGVDLVVINPAIVLGPLLQPNVNASVTHILKYLDGSAKTYANAVQGYVHVCDVAEAHVRVFEAPEAKGRYLCAESVLARGDVVQILTKLFPAYPNIPMKCSDEKNPRKQPYKFSNQRLKDLGLKFTPAAQCLYETVRSLQDKGHLPVISPRAPSSLRLGESNHHFFVSKI
		c32128.graph_c0	ATGGGTGGAAATGGAAAGACTGTGTGCGTGACTGGTGCATCTGGGTACATCGCCTCGTGGCTGGTGAAGCTCCTCCTCAGTGAGGGCTACACGGTGAAGGCCTCTGTTAGAGACCCTGCTGATCCAAAGAAGACGGAACACTTGCTTGCATTGGATGGAGCTAATGAGAGATTGCATTTGTTTAAAGCAAACTTACTGGAAGCAGGCTCTTTTGATCCCGTGGTTGCTGGATGTGATGGTGTTTTTCATACTGCATCTCCTTTCTATCATGCAGTCACAGATCCTGAGGTGGAGCTAATTGATCCTGCGGTGAAAGGAACTCTTAATGTTTTGGGTTCCTGCATGAAAACTCCATCTGTTAGAAGGGTTGTTGTGACCTCATCTATGGCTGCTGTTGCG…	MGGNGKTVCVTGASGYIASWLVKLLLSEGYTVKASVRDPADPKKTEHLLALDGANERLHLFKANLLEAGSFDPVVAGCDGVFHTASPFYHAVTDPEVELIDPAVKGTLNVLGSCMKTPSVRRVVVTSSMAAVAYNGKPRTPNVIVDETWFSSPELCREIKSWYVLSKTLAEEAAWKFSRDNSLDMVTINPAMVIGPLLQPTLNTSSAAILNIINGASTFPNLTFGWVNVQDVAKAHILAYEVPSASGRYCLVDRVAHYSDIVKILQELYPSLQLPQKCADDQPFQPTYQVSKEKTKNLGIDYIPLETSLKEAVESLKEKGFFKI
		c38925.graph_c1	ATGAACCCGCTGCCGCCCGTCACGCACACCGTTTCTTTACCTTCCGACGACGACGACGACGACGACGAAGGGGGCGGTGAGATTACCGGGAGGTGCTCGGGTGCTTCGACGGCGGCGATGTCACCGCCGAGTTCTAGTTATCGGGCATTGATGCCGACGACTCCGACTCCGACCTCGTCGGGGCTTAGGGTTTCGAAGTATGGAAGCACATCCTCAAAGAGAACATGTGCAATATGTCTGGGCATCATGAAAGCAGGCCAGGGTCATGCCCTCTTCACCTCCGAGTGCTCACACACGTTTCACTTCCACTGCATTACCTCAAATGTAAAGCATGGGAACAAAGTGTGCCCTATTTGCCGGGCTAAATGGAAGGAGATACCTCTCCTGGGTCCAACAAAC…	MNPLPPVTHTVSLPSDDDDDDDEGGGEITGRCSGASTAAMSPPSSSYRALMPTTPTPTSSGLRVSKYGSTSSKRTCAICLGIMKAGQGHALFTSECSHTFHFHCITSNVKHGNKVCPICRAKWKEIPLLGPTNSDAPPRRVCVNPISWIQDDGYMNLLRRIPRTDSSNRHHHHLPSIFQVSEPDSYNDDEPVDFQAKNVTENQCIEALEIRTYPEFSSMPKMTTEENFTVLVHLKAPRAGTNIIPSRSTTISQTSRAPIDLVTVLDISGSMAGTKLALLKRAMSFVIQNLGPADRLSIVAFSSTARRLFHLRRMSETGRQQALQAVNALVSSGGTNIAEGLRKGAKVIEERKEKNPVCSIILLSDGQDTYTVSSSGGEARDYQSLLPSSIQMPVHAFGF…
		c34475.graph_c1	ATGCACGTGCTCAAGTACCTGGATGGGTCGGCCAAGACGTATGCGAATGCTGTACAGGCCTACGTGCACGTGCGTGATGTCGCGGAGGCCCACGTTCGAGTGTTTGAGTCTCCAGAAGCGAAGGGACGGTACTTGTGTGCAGAGAGCGTTTTGCACAGAGGTGATATTGTTCGAATTCTCACCAAGCTGTTTCCGGAGTATCCAATTCCCACAAAATGCTCTGACGAGAAGAACCCTAGAAAACAACCATACAAGTTTTCGAACCAAAGGCTCAAAGACTTGGGGCTCGAGTTCACGCCCGCGACACAGTCTCTCTACGAAACCGTAAAGAGCCTCCAGGATAAAGGTCACCTACCCGTGATCTCACCACAGGCTCGATCGTCGACCCTTCAACTC	MHVLKYLDGSAKTYANAVQAYVHVRDVAEAHVRVFESPEAKGRYLCAESVLHRGDIVRILTKLFPEYPIPTKCSDEKNPRKQPYKFSNQRLKDLGLEFTPATQSLYETVKSLQDKGHLPVISPQARSSTLQL
		c36807.graph_c1	ATGCAGAATTGGTATTTCTATGCAAAGGCGGTAGCAGAGCAAGCGGCATGCGATTTGGCTGCAGAGAAAAGGGTTGATCTGGTGGTTGCCAACCCAGTCTTGGTGCTGGGTCCACTTCTCCAACCTACCGTAAATGCCAGCGTAATGCACGTACTCAAGTATTTAAACGGGTCGATGAAGACCTACGTCAATGTTGTACAGGGTTATGTGCACGTGCATGATGTCGCGGAGGCGCACGTTCGGTTGTTTGAAGCTCCAGAAGCCAAGGGACGCTACTTGTGCGAGGAGAGTGTTTTGCACAGAGATGATATAGCTCAAATTCTCACAAAGTTGTTTCCAGAATATCCAATTCCTACAAAG	MQNWYFYAKAVAEQAACDLAAEKRVDLVVANPVLVLGPLLQPTVNASVMHVLKYLNGSMKTYVNVVQGYVHVHDVAEAHVRLFEAPEAKGRYLCEESVLHRDDIAQILTKLFPEYPIPTK
		c30875.graph_c0	ATGGCTCCTGCTTGTGTGCATCCAAGCTCGAAGGCGATGTGTGTCATGGACGCATCGGGCCGGCTCGGCGCCTCCCTCGTCGAGGAGCTCATCCTCAGAGGATACACCGTTCATGCCACCCTCTGCAACCATGGTGAGTTGAATGTGAGCAAGAGTCTGTCCATGGAGGCCAGAAAAAGGCTGAAGGTGTTCAGGTCAGACCCATTCGATTATCACAGCATTGTCGATGCAATGAAGGGATGTTCAGGACTTTTCTACAATTTCGAGCCTCCAAAGGACCAACCAACTTATGATGAGTTCATGGTTGAAATGGAGGTGAGGAGTGCACATAACGTGCTGGAAGCGTGTGCGCAAACGGAGACCATGGAGAGGGTAGTGTTCACGTCGTCGGTGACTGCT…	MAPACVHPSSKAMCVMDASGRLGASLVEELILRGYTVHATLCNHGELNVSKSLSMEARKRLKVFRSDPFDYHSIVDAMKGCSGLFYNFEPPKDQPTYDEFMVEMEVRSAHNVLEACAQTETMERVVFTSSVTAVVWKENRKSMDDLDERDWSEPNFCRKFKLWQALAKTLSEKTAWALAMDRGVDMVSINAGILTGPELSAATPSLKGTPEMYEDGVLVTVDIKFLADAHICAFESSSTYGRYLCFNHAICRPEDAVKFSQMISPSAPCPPPSEGLRVVQQRIKCKKLNKAMVEFAEGV
		c31437.graph_c0	ATGGACGAGGAATGTTGGTCAGATCTTGATTACTGCAGGACAAATGAGAAGTGGTATGAACTTTCCAAGACAATGGCAGAGGCTAAGGCTCTGGACTATGCAACAAAATATGAACTTGATGTCCTGACTCTTTGCCCACCTTTTATTATTGGTCCGCTGCTTCAATCTGCCTTGAATACTAGCAGCTTGATTTTAATCAATTGGTTGAAAGGAGATCCCGAATCAATGGAGAACGAGGTCTGGTCCTTTGCAGATGTTCGGGATGTAGCCGATGCGCTGCTTCTGCTATACGAGAAGCCCGAAGCATCGGGACGATATATATGCGCACCGAATCAAATTAGCTTCCGTGATCTATTTGACACGATAAAGGGCATGTATCCCGATTTAGACTGCCCAAAG…	MDEECWSDLDYCRTNEKWYELSKTMAEAKALDYATKYELDVLTLCPPFIIGPLLQSALNTSSLILINWLKGDPESMENEVWSFADVRDVADALLLLYEKPEASGRYICAPNQISFRDLFDTIKGMYPDLDCPKRFTDADERPLMTSVKLEMLGWKSKPLKEILADTIDFYKEAGY
		c33336.graph_c0	ATGTCATCATCAACGATGGAGAAGCGAGTCCTGGTGACCGGCGGCAACGGCTTCATTGGAACCCACCTTGTCCGCCTCCTCCTGGAGAAGTCCTACTACGTCCACGCCACCCACCACCCCTCCGCGGACCCCACCCACCTCCTCTCCCTCCCAGGGTCCCACGGCCGCCTCCGCCTCTTCCCCACCGACCTCCTCGATGCCCCCGCCATATCCGCCGCCGCAAAGGGCTGCTGCGCTGGCATCTTCCACGTGGCGTCACCCTGCACGCTTGAGGACCCGTTGGACCCGCAGGGGGAGGTGGTGGCCCCAGCCGTGAGGGGGACGGAGTACGTCCTGGAGGCGGCGAGGGAATGCGGGGCCAGGAGGGTTGTGGTGACCTCGTCGATCTCGGCGATGGTG…	MSSSTMEKRVLVTGGNGFIGTHLVRLLLEKSYYVHATHHPSADPTHLLSLPGSHGRLRLFPTDLLDAPAISAAAKGCCAGIFHVASPCTLEDPLDPQGEVVAPAVRGTEYVLEAARECGARRVVVTSSISAMVPNPGWCPGRVVDEECWTDVDYCKQRTKWYPVSKTLAEKVAWEHAEKYGMDIVVINPSTCLGPLLQPSLNASSAVLQQLLQGSKDTQEYHWLGCVHVRDVAAAHILLLETPNVSGRHLCTNGIYQFKDFAETVTKLCPGYNVHRFTEETQPGLVACKDPAKKLIGLGLVFTPIEEAIKESESSLRAHGFLSQPNVQS
		c24301.graph_c1	ATGAATCCAAAGTGGCCAATACAGAAGCTTATTGATGAGGATTGCTGGTCAGATAGAGATTATTTCAGAACAACAGAGAACTGGTACTGCCTTTCCAAGACACTTGCAGAGGCCGAGGCTCTGAAATACATAACAAAACATGGACCCGATGTTGTGACTGTCTGCCCGTCCATTGTTATCGGTCTGCTGTTTCAATCTACTGTGAATTCTAGCAGC	MNPKWPIQKLIDEDCWSDRDYFRTTENWYCLSKTLAEAEALKYITKHGPDVVTVCPSIVIGLLFQSTVNSSS
		c34475.graph_c0	ATGACTATCGATGCTCAAGAGCTTCCAGGCCATGGCCAGACCGTTTGCGTGACCGGGGCCGGAGGCTTCATCGCGTCGTGGCTCGTCAAGCTCCTCTTGGAGAGGGGCTATACCGTCAAAGGAACAGTCAGAAATACTGAGGATCCGAAGAACAATCATTTGAAAGCAATGGAGGGAGCTGCAGATAGGTTGATTCTCTGCAACGCTGATTTGTTAGACTTCGACGCGCTGCGGGCGGCGATCCACGGCTGTAATGGCGTGTTCCACACTGCCTCGCCGGTCACCGATGATCCGGAGTTGATGGTGGAGCCAGCCGTGAGGGGGACAAGATACGTGATAGATGCCGCTGCAGAGGCCGGAGTCCGGCGCGTGGTGTTCACGTCGTCCATCGGTGCGGTC…	MTIDAQELPGHGQTVCVTGAGGFIASWLVKLLLERGYTVKGTVRNTEDPKNNHLKAMEGAADRLILCNADLLDFDALRAAIHGCNGVFHTASPVTDDPELMVEPAVRGTRYVIDAAAEAGVRRVVFTSSIGAVTMDP
	CAD	c37045.graph_c0	ATGGCAAACCTCATGCAGACAGTCTCAGGTTGGGCTGCCATGGATTCAACAGGAAAAATCAACCCCTTCTCATTCAAAAGAAGAGAAAATGGAGTGGATGATGTGAGCATAAAGATAGAGTACTGTGGGATTTGCCACACTGATCTTCACCAGATCAGAAATGACTGGGGCAACTCTGTTTACCCTCTTGTGCCTGGGCATGAGATCACCGGCATAATCACCGAGGTAGGAGGTAACGTGAGCAACTTCCAGGTGGGAGATAGGGTCGGTGTCGGATACATGGCGGTGGCGTGCCTCAACTGTGACATGTGCAAGGAGTCTCAGGAGAACTACTGCGACAAGATGCAACCAACTTGCAATGGTGTCTTTTGGGATGGCACCATCACGTATGGTGGGTAC…	MANLMQTVSGWAAMDSTGKINPFSFKRRENGVDDVSIKIEYCGICHTDLHQIRNDWGNSVYPLVPGHEITGIITEVGGNVSNFQVGDRVGVGYMAVACLNCDMCKESQENYCDKMQPTCNGVFWDGTITYGGYSRMLVAHKRFVVHIPDSLPLASAAPLLCAGVTVFTPMKQHNMLQTPGKKLGVVGLGGLGHIAVKFGKAFGLHVTVISTSPSKEADAKEQLGADDFLISTNHEQMKDATRSLDFIIDTVGSQHSLGPLLELLKVKGILALVGAPDKPLYLPAFPLIFGKRVISGSIIAGMEETQEMMDLCGNHNIECDIEIVKMDSINEALDRLAKNDVRYRFVIDVAGSASSGM
		c9037.graph_c0	ATGTCTTTCACATACAATGCGATTGGATCCGATGGAACCAAGAATTACGGTGGCTATTCGGAGAACATTGTGGTTGATCAACGGTTTGTTTTGCGGTTTCCGGAGAATTTACCGAGCGATTCGGGTGCGCCGTTGCTGTGTGCTGGAATCACTGTGTATAGTCCAATGAAGTATTATGGTATGACTGAGGCAGGGAAGCATTTAGGGGTTGCTGGACTTGGTGGGCTTGGTCATGTTGCTGTTAAGATTGGTAAAGCTTTTGGTTTGAAAGTTACTGTCATTAGTTCTTCTTCTACGAAAGCAGTGGAAGCCATTAATCATCTGGGTGCTGAT	MSFTYNAIGSDGTKNYGGYSENIVVDQRFVLRFPENLPSDSGAPLLCAGITVYSPMKYYGMTEAGKHLGVAGLGGLGHVAVKIGKAFGLKVTVISSSSTKAVEAINHLGAD
		c15831.graph_c0	ATGGCGGATATCGAGCTTATTTCCATGGATTATGTGAATAAAGCTATGGAGAGGCTTGCGGGAGCCGATGTTAGATATCGGTTTGTGATTGATATTGCGAACTCGTTGAATGCTTCCGCT	MADIELISMDYVNKAMERLAGADVRYRFVIDIANSLNASA
		c27208.graph_c0	ATGGTGAACTCGTGCCGCTCGTGCGATAGCTGCAACCAGCACCATGAGAACTACTGCCCCAAGATGATTTTAACCTACAACTCCCTCGACACGGATGGCACAATAACCTACGGAGGCTACTCCAGCACAATCGTGGTCAATGGGCATTTCGTGGTCAAGTTCCCTGAGAGCTTGCCGATGGACAGAGGTGCACCGCTGCTTTGTGCT	MVNSCRSCDSCNQHHENYCPKMILTYNSLDTDGTITYGGYSSTIVVNGHFVVKFPESLPMDRGAPLLCA
		c29266.graph_c0	ATGTTTCCTGTTGTTGATTTAGAGGCAATACCCAGTACTAATCCAAGAGGTTATGTTAATCTTTTGTGGAAGCAGCTTGATCACCTTGGGGCTATCACGGATAATGATGACAAATTGAAGATTTTGCACTGTGAAATATGTCATACTGACCTTCACATCATAAAGAATGATTTTGGTAATGCCATGTATCCCGTTGTTCCAGGGCAT	MFPVVDLEAIPSTNPRGYVNLLWKQLDHLGAITDNDDKLKILHCEICHTDLHIIKNDFGNAMYPVVPGH
		c27921.graph_c0	ATGGGAAGTGTTGCATCAGAGAGGATCGTAACTGGGTGGGCAGCAAAGGATCCTTCGGGTGTCCTCTCACCCTACACCTACACTTTGAGAACGACAGGGACAGAGGATGTGGTGATCAAAGTGTTGTATTGTGGAATCTGCCATACCGATCTTCATCAGACCAAGAATCATCTCGGCATGTCAAATTATCCCATGGTCCCTGGGCATGAAGTGGTCGGGGAAGTTGTGGAGGTGGGATCCGATGTAAGCAAGTTCGCCCTGGGCGAGACCGTTGGGGTTGGTTGCATCGTCGGGTGTTGCAGAGGGTGCACCCCGTGCAAGGCGAATATCGAGCAGTACTGCAACAAGAGAATTTGGACGTATAACGACGTGTATACCGATGGGAAGCCGACGATGGGA…	MGSVASERIVTGWAAKDPSGVLSPYTYTLRTTGTEDVVIKVLYCGICHTDLHQTKNHLGMSNYPMVPGHEVVGEVVEVGSDVSKFALGETVGVGCIVGCCRGCTPCKANIEQYCNKRIWTYNDVYTDGKPTMGGFASTMVVDQKFVVKIPPGLASEQAAPLLCAGVTVYSPLRYFGLTTPNLRGGILGLGGVGHMGVQIAKAMGHHVTVISSSDKKRTEAMEHLGADAYLVSSDEAQMATALDSLDYIIDTVPVFHPLEPYLSLLRVNGKLILTGVISQPMQFITPMVMLGRKSITGSFIGSMDETQEVLDFCEKKGLTSMIEMVKMDQVNEAMERLERNDVRYRFVVDVAGSNIEP
		c34897.graph_c3	ATGTATATATATGTGTGTGAATGGATATGTGAATATATATGTTTGTATATGTATGTGAGCTGTGATCCTCACAGCAGTGGTTGCGAGGCGAGGCATCCAACAATATTTTTTTTCCCTACAGCAAAGTATTCGCGACCGGAAATTGTAGTATTAGCGACCGGATATTTACAGGTAGTTATTTGCGACCGGCATATGTACGGTCGCAAAAGAATTTTATTAGCGACCGGTTTCCGGTCGCGAATAAAACATTCGCGACCAACTTTTTCGCGACCGGTTATTAGCGACCGGATATTTTATCCGGTCGCTAATAATTCTTTTGCGACCGGCCGCAAAGTATTTGCGACCGGT	MYIYVCEWICEYICLYMYVSCDPHSSGCEARHPTIFFFPTAKYSRPEIVVLATGYLQVVICDRHMYGRKRILLATGFRSRIKHSRPTFSRPVISDRIFYPVANNSFATGRKVFATG
		c19623.graph_c0	ATGACTGAATCCACGCCAAACCATACTCAGACGGTGGCTGGTTGGGGAGCTCTGGAAGCCAATGGGAAGATTGCTCCATTTGTCTTCAAACGAAGGAAGAATGGGGTAGATGATGTGAGCATAAAGATCTTGTACTGTGGAATGTGCCACACTGATCTCCACCATCTTAGGAACGACTGGGGCATCTCCATCTTCCCTCTCGTGCCTGGGCATGAGATTACTGGCATTGTCACCGAGGTCGGGAGCAAGGTGAATAACTTCAAGGTGGGAGACAAGGTGGGAGTAGGATGCCTAGCGGCAACATGCCTCAATTGTGAATTCTGCAATAACGACGAAGAGAATTACTGTGATCAGGTGCAGTTTACATACGGTGGCATCTTTTGGGATGGCAGCATCACT…	MTESTPNHTQTVAGWGALEANGKIAPFVFKRRKNGVDDVSIKILYCGMCHTDLHHLRNDWGISIFPLVPGHEITGIVTEVGSKVNNFKVGDKVGVGCLAATCLNCEFCNNDEENYCDQVQFTYGGIFWDGSITYGGYSEMLVANKRYVVHIPDNLPLDRTAPLLCAGITIYSPMKEHNMLQPGKKLGVVGLGGLGHVAVKFGKAFGLHVTVISTSPSKKGEAIDKLGADSFLISTDTEEMQASTRTLDYVIDTVAAKHSLGPILDLLKVSGTLVFVGAPDKPVDLPAFPLIFGKRKVVGSMTGGMKETQEMINICGKHNITCDIEVVKPDYINEAISRLAKNDVKYRFVIDIAGNS
		c23836.graph_c0	ATGGCGGGAAAAACGAACAGGACGATGGAGGAGCAGCCGAGGAAGGCGTTCGGGTGGGCGGCGAGGGACAGCTCCGGTGTCCTCTCCCCCTTCTCCTTCTCGCGAAGGAATAATGGAGACGATGACGTCACCTTAAAGATCCTGTACTGTGGAATCTGTCACTCGGACCTCCACACCATCAAGAACGAGTGGCAAAATACGTCCTACCCGGTCGTTCCTGGGCATGAAATCGTGGGTGTTGTCACTGAAGTCGGCCGCAACGTAACCAGATTCGAAGTAGGAGACAGGGCTGGAATCGGATGCATGGTCAACTCCTGCCTCTCGTGCGACAGCTGCAGCCACGGCCAGGAAAACTACTGCCCCAACGTCGTCTACACGTACAACTCGATCGACTACGAC…	MAGKTNRTMEEQPRKAFGWAARDSSGVLSPFSFSRRNNGDDDVTLKILYCGICHSDLHTIKNEWQNTSYPVVPGHEIVGVVTEVGRNVTRFEVGDRAGIGCMVNSCLSCDSCSHGQENYCPNVVYTYNSIDYDGIKTHGGYSDMIVAKERFVVRFPESLPMDRG
		c32593.graph_c0	ATGGATGCTGAAAGTGGAAACTGTCTTGGATGGGCAGCCAGAGATACATCTGGGGTTCTCTCTCCCTATAGTTTCAATCGCAGGGCTCTTGGGGCTTGCGATATTTCTATTAGAATAACACATTGTGGAGTTTGCTACGCTGATGTCATTTGGACAAGAAATAAACATGGGGACTCAAATTATCCCTTGGTTCCTGGGCATGAGATTGTCGGAGTTGTCACAAGGAGTGGTTCCAATGTTGATCGTTTTAAAGTTGGTGATCACGTTGGAGTTGGGACCTACGTAAATTCTTGTAGAGAATGCAACTATTGTAATGAAAAGTTAGAAGTTCATTGCTTAAAAGGGCCAACTTCCACTTTCAACGCGCTAGATTCAGATGGAACATTCACCAAAGGAGGA…	MDAESGNCLGWAARDTSGVLSPYSFNRRALGACDISIRITHCGVCYADVIWTRNKHGDSNYPLVPGHEIVGVVTRSGSNVDRFKVGDHVGVGTYVNSCRECNYCNEKLEVHCLKGPTSTFNALDSDGTFTKGGYSSYIVVHERYCYTIPDGYPLAQAAPLLCAGITVYTPMIRHNMNQPGKSLGVIGLGGLGHMAVKFGKAFGLRVTIFSTSASKKEEALKLLGADKFVISSDEEEMQSLANSLDFIIDTASGDHPFDLYMSLLRIGGIMALVGFPSEIKIHPASLNIGSKTLSGSIAGGSKDTQEMLDFCAANKIYPNVEVIHIQYINEALERLINRDIKYRFVIDIENSLK
		c21584.graph_c0	ATGTTGCACTACCAGCCACCATTTTCCTTCAACAAGTGGGTTGCAACTCAAGTGACTTATCAGGTGCTCCCATGTTTTGCTTTCAATGTTCTTCAAATAACTGATCAATTGCCGAAGAGAATGAACATCAGATATCATGTCGATGATACCATCCATCATTCCAATTACAGCCATGGATGGAAGCAACGTCGGCGATATCCACCCGTAGCTTCTCAGATCGTCCGGGGGGGTTTCGACCAAGAAGGATCGGCCAGGGGGGCTCGTCCAGGAGTCTTGACCAGGGTGGATCGGCTAGAGGGGTCGTCCAGGGGGCTCGACCAGGAGAGGATCGTCCATGGGGCTCGACTAAGGGGGCTCAGGCAG	MLHYQPPFSFNKWVATQVTYQVLPCFAFNVLQITDQLPKRMNIRYHVDDTIHHSNYSHGWKQRRRYPPVASQIVRGGFDQEGSARGARPGVLTRVDRLEGSSRGLDQERIVHGARLRGLRQ
		c41339.graph_c0	ATGGATGAGATTAACACTGCGATGGAGAGGCTTGCTAAGTCTGATGTTAGGTACAGGTTCGTGATCGACGTGGCTAACTCCTTGAGCCCTCCA	MDEINTAMERLAKSDVRYRFVIDVANSLSPP
	HCT	c36798.graph_c0	ATGATATCATGGTGCAAAATGACTCAAGGCATCACCGAATTGGGTAACCCTCCGATCCATGATCGCACCATCCTTCGAGCTCGATCCCGACCTAAAGTTACCTTCGATCACGTCGGAAACCAACTTCCTAGTCAGATTCACTCAGCCCAGTCTCCCACCACTTGTTCAATATTCAAACTCACCAAATCCCAACTTGCTTTCCTCAGAAAAAACAACAAATTCTCAACATTTGACGTGGTTAGCGCGCATGTGTGGAGATGCGTGTGCATTGCTCGTGGACTCGCACGTGATCAAGAAGCACGACTTAATTTTCCAATCGAGGCACGTGGGCGCCTGAGGCCACCGCTGCCCAACAGCTATTTTGGCAACGTGGTGTGCAGATTGGTAGTGGTTGCGACT…	MISWCKMTQGITELGNPPIHDRTILRARSRPKVTFDHVGNQLPSQIHSAQSPTTCSIFKLTKSQLAFLRKNNKFSTFDVVSAHVWRCVCIARGLARDQEARLNFPIEARGRLRPPLPNSYFGNVVCRLVVVATVDDIISNPIDFTAYKIRDEIKKVNDEYVRSYIDHLEVSTKKKLMLTPAERNTTKSTMLSKDSSNSSPSWVPESVAPQTQDNFLLTPSKMDFGVVSWLGFPFSGTDFGWGKPKILRRANISHGCYAYAMDSLVNDGEVLVPVLLETENMERFNKAFCEELSMHSVERIEKLRSKY
		c37009.graph_c0	ATGAACTTCTTCGACGCTGGAGTCCTAATGGAGGCGTTGGGCAGGGCACTGGTTACGTTCTATCCGGTGGCAGGGAGGTTGGCGAGGGACGCCGATGGCCGCATCGAGATCAATTGCAATGGAGAAGGGGTGGAGTTTGTGGTCGCGGAGGCGGACTCGGTTATCGACGAGTTTGTGGATTTCGCACCCACGATGGAGCTTGAGAAGCTGATACCGAGAGTGGAGTACACCGACGACATCTCCGCTTTTCCTCTGCTTGTGCTACAGGTCACCCACTTCAAGTGCGGCGGAGCATCCCTAGGCGTCGGCATGCAGCACCAAGTTTCCGATGGCACTTCCTCTCTTCACTTCATCAACTCATGGTCTGACATTGCCCGCGGCCTCGACATCGCCGTCCCG…	MNFFDAGVLMEALGRALVTFYPVAGRLARDADGRIEINCNGEGVEFVVAEADSVIDEFVDFAPTMELEKLIPRVEYTDDISAFPLLVLQVTHFKCGGASLGVGMQHQVSDGTSSLHFINSWSDIARGLDIAVPPFITRSLLRARRPPSPSFPHIEYQPAPSMTQAPTLQPDPTATTVKMFNITRQQLDRLKSKVNAKYSSYVLLAGHVWRCASIARGLPGDQPTKLYCAVDGRTRLRPPLPSGFFGNVIFTATPLADAGEITCNDNGLETAAERIQGVLTGMDDQYLRSALDYLEMEPDLSKLVKGAHTYRCPNVGLTSWTRLPIYDADFGWGRPVFMGPGRIAFEGLAYLLPCTKGDGSLFVAIKLQAEHMVKFQKLLYEI
		c37574.graph_c2	ATGGTCGCCATTGAAGTAGTAAAGTCCGAGCTAGTGTTTCCAAGCGAGGAAACTCCGAAGCATCGCTTGTGGATTTCGAATGCAGACATAATGTTTGCCACCAAATTGCCGACGCCGATGATTTACGTCTATCGCCCTAACGGGGATCCCGACTTCTTTAACGTGGAGACGCTGAAAGCAGGTCTGAGCAAGGCCTTGGTGCCCTTCTACCCGCTCGCTGGTCGGCTTGCTAAGGACCGGGACGGACGGCTAGAGGTTGATTGTGGCCGACAGGGCGTGTTGCTTGTCGTTGCCCGGTCAGATTCTGGAATCGACGATTTCGGAGAGTTCTTGCCGTCGCCGGAGCTGTGTAGGATGCTGACGCCGTCTATTCCTTCTGAAGATCCAGATATCTTGTTC…	MVAIEVVKSELVFPSEETPKHRLWISNADIMFATKLPTPMIYVYRPNGDPDFFNVETLKAGLSKALVPFYPLAGRLAKDRDGRLEVDCGRQGVLLVVARSDSGIDDFGEFLPSPELCRMLTPSIPSEDPDILFMTQVTFFKGGEVILGTVWCHVIGDGLSAMNFISTWSRITRGVVANLDIHPLHDRTLLRARSPPKVLFNHVGNQLPCAATTTGPSATSILPLTKSQLALLTTNSKISTFCAISAHVWKCVCIARGLARDQAVQLKFAANMRRRMSPPLPDDYFGNAVCRMVVVSTVDDVLSNPIEVVGNKIRDEIRKVDEEYVRSFIDHLEITSGKPTTASANFSLTPTMADFGMVSWIGLPFYDADFGWGKPEIVRRAAVTHGQFAYIMENPKGDG…
		c36589.graph_c0	ATGGTTGAAATTTTAGAATCCAGCATGGTGATTCCAAGCGAGCCAACCCCAACCGACCCAATCTGGCTCTCGAATCTCGATCTCTTGGTCGCCCGGGCACACACTCCAGCGATCTACTTTTACCGGCGGAACGGCGACCCCAACTTCTTCGCGGTCGACCCGCTAAAATCGGCGCTTGGCAAAGTGTTAGTTCGGTTTTATCCACTGGCCGGTCGGCTTGGGCAGGACCGGGCCGGCCGGGTCGAGATCAGGTGCACGGCTGAGGGGGTTCTTTTTGTGGTGGGCCGGACGGAGATGACGGTAGATGATTTCGGAGATTTCGAGCCGTCGGATGAGATGAGGCGGTTGCTGGTGCCGTCCGTGGAGTCCGATGACCCACCGCTGGTCATGTTTCAGGTA…	MVEILESSMVIPSEPTPTDPIWLSNLDLLVARAHTPAIYFYRRNGDPNFFAVDPLKSALGKVLVRFYPLAGRLGQDRAGRVEIRCTAEGVLFVVGRTEMTVDDFGDFEPSDEMRRLLVPSVESDDPPLVMFQVTFFKCGGVCLGTAVHHTAADGLAALHFVNTWSDFARGIATVSTPPFLDRTLLRARSPPAAPYDHPEYSPKPPSTTKPQFASAHLKLSRNQIKRLKSNPSNPSVPLSTFKAVVAHAWRSACIARSLPPNEQTRLLMTADARARVQPPLPRGFLGNAIFRASAVSTVGDISSNTIEFGAEKITGATRRLDDGFVRSLIDYLETVEEVKGLQKGRWVMPRGDMWVISWLGLPIYEADFGWGRPIFMGRACLQFSGLVYVMEDASESGGI…
		c34482.graph_c0	ATGACCCGGACGAGAGCGTCGAGAATAAACTCGTGCCAGCAAAAAAAGGATGGAGTCATGTGTGTACAGGCAACAGAGCTTAAATGTGGAGGTATTGTCGTCGGGTGCACATTCGATCATCGTATAGCTGATGCCTACTCGGCCAACATGTTTTTAGTAGCATGGGCAAAGATTTCAGCCACGACAGCCGAAGGTTCCAAGTGTAAGAAGCCTTTGCTGGTCACCCCATCTTTCCGGCGATCTTTGCTGAGCCCTCGACGATCCGGGCGATACGATGAAGCCCTAGACAGGCTATACATGCCCTTATCGGCGGTGAAGACGAAAGGTGGCTCAGATCGTCATGCTCTTGAAACCGCAACCAACCGTATCTACTGCATCGCATCTGCTCACATTGATCGA…	MTRTRASRINSCQQKKDGVMCVQATELKCGGIVVGCTFDHRIADAYSANMFLVAWAKISATTAEGSKCKKPLLVTPSFRRSLLSPRRSGRYDEALDRLYMPLSAVKTKGGSDRHALETATNRIYCIASAHIDRMQEEASSGGTKRSKMEAFSAYLWRVIGKGARKRNPEACNTCRMGIVVNGRCRLKEVHSDIMDNYFGNVLSIPYGAVGLNELEHKTLTDVADVVHDFLKEATNAEHFLELIDWVEAHRPEPAAARIYLQEEDEGAAFVVSSGRGFPVTEIEFGWGRPVFGSYHFPWGGSAGYVMPMPSAKGNGDWIVYMHLMKDLVQVLEMEAGHVFRPLTSDYVMST
		c22698.graph_c0	ATGATCATCAACATCAAGGAAACCACGATGGTGTGCCCGTCGCAGCCGACGCCAAACCAACGGCTGTGGAACTCGAACCTCGACCTGGTGGTTCCGAGGTTCCACACGCCGAGCGTCTACTTTTACCGGCGGCCGGAAAACGCCGCGGACTTCTTCGACGGCCGGATCCTGAAGGAGGCGCTGGGGAGAGCCCTCGTGCCGTTCTACCCGATGGCGGGGAGATTGGCGAGGGACGAGGACGGGCGGGTGGAGATCGATTGCAACGGAGAAGGGGTTCGGTTCGTGGTGGCGGAGACGGACTCGGCGATCGACGAGTTCGGCGACTTCGCGCCGACGATGGAGCTGAAGAAGCTGATTCCGAAAGTGGAGTACGGGGACGACATCTCTGCTTTTCCTCTG…	MIINIKETTMVCPSQPTPNQRLWNSNLDLVVPRFHTPSVYFYRRPENAADFFDGRILKEALGRALVPFYPMAGRLARDEDGRVEIDCNGEGVRFVVAETDSAIDEFGDFAPTMELKKLIPKVEYGDDISAFPLLVLQITHFKCGGASLGVGMQHHVADGASGLHFINSWSDIARGLDIAIPPFIDRSLLRARDPPSPSFPHIEYQPAPSMNTSPAPLQDPTLKSDPTATAVSIFKLTKQQLDLLKSRVSAKYSSYALVAGHVWRCTSVARGLPDDQRTKLYCATDGRARLQPPLPSGYFGNVIFTATPIADAGEITGEVNGLEAAADRIQRALVRMDDEYLRSALDYLELQPDLSKLVRGAHTFRCPNIGLTSWTRLPIHDADFGWGRPIFMGPGGIAY…
	CCoAMT	c30806.graph_c0	ATGACTACCATCACCACTACCGTCGTTGAGACCACCACCAACGGAGAGCAGCAGACGAGGCATCAGGAAGTCGGGCACAAGAGTCTTCTGCAAAGCGATGCACTCTATCAGTACATCTTGGAGACCAGTGTTTATCCAAGGGAGCCAGAGTGCATGAAAGAACTCAGGGAGATCACAGCCAAGCACCCATGGAACATCATGACGACTTCAGCCGATGAGGGTCAGTTCCTGAACATGCTTTTGAAGCTGATCAACGCGAAGAACACCATGGAAATCGGTGTTTACACTGGCTACTCCTTGCTTGCCACTGCCCTTGCCCTCCCTGACGATGGCAAGATATTGGCAATGGATATTAATAGAGAGAACTACAATCTTGGCCTTCCTGTCATCGAAAAGGCC…	MTTITTTVVETTTNGEQQTRHQEVGHKSLLQSDALYQYILETSVYPREPECMKELREITAKHPWNIMTTSADEGQFLNMLLKLINAKNTMEIGVYTGYSLLATALALPDDGKILAMDINRENYNLGLPVIEKAGVAHKIDFREGPALPALDLMLEDEKYHGSFDFVFVDADKDNYLNYHKRIIELVKVGGLIGYDNTLWNGSVAAPPDAPMRKYVRYYRDFVLEFNKVLATDSRIEICQLPVGDGITLCRRVI
		c26515.graph_c0	ATGGAGGAGGAAAATTTTGTTGACCCCCCAAAGATCCTTTTACGTAGTGAAGCCCTTCATGATTACATAATAGAGACAAATGTTAACCCAAGAGAGCATGAACAGCTCAAGAAGCTAAGGGAAAAGACTGCCTTATATGAGCCAGAGGTTCTCTTCAGTGTGCCACCAGAGCAAGGGCAGCTTATGTCTATTCTGCTGAAACTGATGAAAGCAAAGAAAACATTGGAGGTTGGGGTGTTCACTGGTTATTCACTCCTTGTAACAGCTCTGGCCATACCTAAGGATGGAAAGATAACGGCCATTGACATAAACAGAGATGCCTTTGAGGTAGGCCTGCCATTCATTAAGGAAGCAGGAGTTGCCCATAAGATCAATTTCATAGAATCAGACGCACTTGCA…	MEEENFVDPPKILLRSEALHDYIIETNVNPREHEQLKKLREKTALYEPEVLFSVPPEQGQLMSILLKLMKAKKTLEVGVFTGYSLLVTALAIPKDGKITAIDINRDAFEVGLPFIKEAGVAHKINFIESDALAALDKLVEGVNGEEDLFDFAFVDADKESYAKYHERVSKLIKIGGVIGYDNTLWYGSVVTPTDPTLHPEIKRVVYDVIAFNKKLANDPRFEISQIPVGDGFTICRRVS
		c27229.graph_c1	ATGGCCACCTCCACCATCACTGTCGCCGCCGCTGCCGCCACCACGGCGACCCAGAACGGAGAGCAGGGAAGGCACCAAGAAGTTGGGCACAAGAGCCTTCTGCAGAGTGATGAACTCTACCAGTACATTCTGGAGACCAGTGTGTACCCTAGAGAGCCAGAGTGCATGAAAGAGCTTCGAGATATCACGTCAAAGCACCCATGGAACATTATGACGACCTCGGCCGACGAGGGTCAATTCCTGAACATGCTGCTGAAGCTGATCAACGCTAAGAACACCATGGAAATCGGTGTCTTCACCGGATACTCCCTTCTCGCGACCGCCCTCGCCCTCCCCGAAGATGGCAAGATCTTAGCGATGGATATCAACCGAGAGAACTACGAGCTCGGCCTCCCCGTG…	MATSTITVAAAAATTATQNGEQGRHQEVGHKSLLQSDELYQYILETSVYPREPECMKELRDITSKHPWNIMTTSADEGQFLNMLLKLINAKNTMEIGVFTGYSLLATALALPEDGKILAMDINRENYELGLPVIEKAGVAHKIDFREGPALPVLDQMLEDEKNHGSFDFIFVDADKDNYLN
Flavonoid biosynthesis	CHS	c9702.graph_c0	ATGACCGACCTCAAGGAGAAGTTCAAGCGCATGTGCGACAAGTCGACAATTCGGAAACGTCACATGCATCTGACGGAGGAATTCCTCAAGGAAAACCCACACATGTGTGCTTACATGGCTCCTTCTCTGGACACCAGACAGGACATCGTGGTGGTCGAAGTCCCTAAGCTAGGCAAAGAAGCGGCAGTGAAGGCCATCAAGGAGTGGGGCCAGCCCAAGTCAAAGATCACTCATGTCGTCTTCTGCACTACCTCCGGCGTCGACATGCCTGGTGCTGACTACCAGCTCACCAAGCTTCTTGGTCTCCGTCCTTCCGTCAAGCGTCTCATGATGTACCAGCAAGGTTGCTTCGCCGGCGGTACTGTCCTCCGTATCGCTAAGGATCTCGCCGAGAACAAT…	MTDLKEKFKRMCDKSTIRKRHMHLTEEFLKENPHMCAYMAPSLDTRQDIVVVEVPKLGKEAAVKAIKEWGQPKSKITHVVFCTTSGVDMPGADYQLTKLLGLRPSVKRLMMYQQGCFAGGTVLRIAKDLAENNRGARVLVVCSEITAVTFRGPSDTHLDSLVGQALFSDGAAALIVGSDPDTSVG
		c56123.graph_c0	ATGAAGTTAATGCCTTGCTCGGTGAGGCGGCCATCGATGGTGGTTTCGGTGCCCGCGAGGAAGCTTTGGACGGCGACTTGGAGCTGGAAGAGAGGGGTTTCGGAGGTTGCA	MKLMPCSVRRPSMVVSVPARKLWTATWSWKRGVSEVA
		c30475.graph_c2	ATGATCATCGGCGCTGATCCTGTTGAGAACGTAGAAAGGCCCATCTTCAAGCTTGTCTCCGCGGCTCAGACCCTGTGCCCGGACAGCGAAGGCGCGATCGACGGGCATTTACGGGAGGCGGGGCTGACGTTCCACCTGCTGAAGGACGTTCCGGGGATCATATCCAAGAACATCGAGAGGTGCCTGGACGACGCGTTCAAGCCGTTGGGCATATCGGATTGGAACTCGTTGTTCTGGATCGCGCATCCTGGGGGCCCGGCGATACTGGACCAGGTGGAGGAGAAGCTGAAGTTGAAGGAAGGGAAGATGAGGGCGACGAGGGAAGTGCTGAGCGAGTACGGGAACATGTCGAGCGCCTGCGTGGTGTTCATCCTCGATGAGATGAGGAAGAGGTCGGCA…	MIIGADPVENVERPIFKLVSAAQTLCPDSEGAIDGHLREAGLTFHLLKDVPGIISKNIERCLDDAFKPLGISDWNSLFWIAHPGGPAILDQVEEKLKLKEGKMRATREVLSEYGNMSSACVVFILDEMRKRSAAQGKGTTGEGLEWGVLFGFGPGLTVETVVLHSVATN
		c36136.graph_c0	ATGGGATCTGAAGCTAGATCAAGTGCTGCAGCTATTCTTGGGATCGGTACCGCAACTCCACCGTACGTGGTGGAGCAAGACACCTTCCCCGACTACTACTTTAGGATCACCAACAGCGAGCACAAGGTCGAGCTCAAGGAGAAGTTTGTGAGCTTGTGTAAAAATTCCATGATCAGGAAGCGGCACATGTGCCTAACCGAAGACATGCTGAAACAAGACCCATGCATCGCCGCCTACTGCGCCCCATCCCTGGACACCCGTCAAGAGATCATGGAAACTGAGGTCCCAAAGCTTGGAGCGGAGGCAGCCATCGTGGCGATCAAGGACTGGGGAGGATCTAAATCCGACATCACGCACCTCATCTTTTGCAACAGTGGGGGAGCCTCCATGCCCGGGGCC…	MGSEARSSAAAILGIGTATPPYVVEQDTFPDYYFRITNSEHKVELKEKFVSLCKNSMIRKRHMCLTEDMLKQDPCIAAYCAPSLDTRQEIMETEVPKLGAEAAIVAIKDWGGSKSDITHLIFCNSGGASMPGADYALLNLLQLPLSTKRFMLYQQGCYGGGTVLRLAKDVAENNPGARILVVTSEVTSISFRGPCEEHFGNIVCQALFADGAAAVIVGTVPHVTTEHVLFEIVSARQDIVPGSEGAIVGKLREVGLMIDLHPGVAKYAGSIIDKLVKESLEHVGINDWNDAFWVVHPGGRAILDEVEKALGLKKEKLWAPREVLKEYGNMWSSCVLFVMEAMRRKSEEEGKATAGEGLEWGMLFGFGPGLTVETIVLRCP
		c31612.graph_c0	ATGGCCCAAATTCAGGAGATCAGAAGAGCTCAACGGGCCGAGGGGCCCGCAGCCGTGCTCGCCATCGGCACTGCCACGCCGAAGAACGTTTTGTACCAGAGCGAATACCCCGATTACTACTTTAGGGTCACAAAGAGCGAGCACATGACCGACCTCAAGGAAAAGTTCAAGAGGATGTGTGAAAAGTCCACTATCCGAAAGCGATACATGCATGTAACCGAAGACATCCTGAAAGAGAACCCCAACATGAGCGCCTACATGGCGCCGTCCCTCGATGCCCGCCAGGACATCGTGGTCGTCGAGATCCCGAAGCTGGGGAAGGCGGCAGCCACCATGGCCATCAAGGAGTGGGGCCGCCCCAAGTCCCACATCACCCACCTCATCTTCTGCACCACCAGC…	MAQIQEIRRAQRAEGPAAVLAIGTATPKNVLYQSEYPDYYFRVTKSEHMTDLKEKFKRMCEKSTIRKRYMHVTEDILKENPNMSAYMAPSLDARQDIVVVEIPKLGKAAATMAIKEWGRPKSHITHLIFCTTSGVDMPGADYQLTKLLGLRPSVSRFMMYQQGCFAGGTVLRLAKDLAENNRGARVLVVCSEITAVTFRGPSDSHLDSMVGQALFGDGAAALIVGADPDLFMERPIFEMVSASQTILPDSEGAIDGHLREAGLTFHLLKDVPGLISKNIERSLKEAFGPLGIEDWNSVFWMAHPGGPAILDQVEERVGLRPERMRATREVLKEYGNMSSACVLFIMDEMRRWSATEGLPTTGEGMEWGVLFGFGPGLTVETVVLRSVAIN
	CHI	c29518.graph_c0	ATGGGAGAGATTTCGACGATGACTGTAGCGACGACCGGATTGGAGGTCCAGGGGATCGCCTTCCCGGCGGTCATTACACCGCCGGGTTCATCCAAGGCGCATTTCCTTGGTGGTGCAGGTGTTAGGGGGTTGAAGATCGATGGAAAATTTATAGCTTTCACCGCCATTGCAATCTATTTGGAGAATGATTCTGTGAAGACCCTTGCTGAGAAATGGAGAGGAAAGGGAGCTGAAGAATGTTCTGATTCCATGGATTTCTTCAGAGATATCTACGCAGGACCCTTTGAGAAGTTCACCCAGGTGGTCATGCTTCTTCCTTTAACTGGCGATCAATACACCGAAAAGGTATCCGAAAACTGTGTTGCATACTGGAAAGCCATCGGTATCTACACAGACGCT…	MGEISTMTVATTGLEVQGIAFPAVITPPGSSKAHFLGGAGVRGLKIDGKFIAFTAIAIYLENDSVKTLAEKWRGKGAEECSDSMDFFRDIYAGPFEKFTQVVMLLPLTGDQYTEKVSENCVAYWKAIGIYTDAEAAAIEKFKGVFKSQSFPPGSSILFTHSPTGSLTIAFSKDASIPEAGAAVIENKALTQAILESIIGEHGVSPAAKQSLALRLWEILNQVLEDGESKVPTKNYTCMILEEMKNKCL
		c27452.graph_c0	ATGTGTTCTTTGTGGGCAGTGGGCTCTGAGATGGTGATGGTAGATGAGATTCCTTTCCCTCCTCAGATCACCACTACGAAGCCTTTGCCACTCGTAGGTAGTGGCATTACGGATATCGTGATCCATTTCCTTCAAATTAAGCACAATGCAATTGGGATTTACTTGGATGATAATATCGTCGAGCATCTTGGGAATTGGAAAGGCAGGAAGGGAAGCGAGCTCGCCGAAGACGATGACTTCTTCGATGCTCTTATCTCTGCTCCCACAGAGAAGTACTTCAGGGTTGTGATCATCAAAGAGATAAAAGGAGCCCAATTTGGCCTTCAACTGGAAAGTGCTTTGCGAGATAGGCTGGTGTCTGTTGACAGATATGAAGAGGAGGAGGAAGAGCAAGTAGAA…	MCSLWAVGSEMVMVDEIPFPPQITTTKPLPLVGSGITDIVIHFLQIKHNAIGIYLDDNIVEHLGNWKGRKGSELAEDDDFFDALISAPTEKYFRVVIIKEIKGAQFGLQLESALRDRLVSVDRYEEEEEEQVEKIAHFFQAPYFKRGSVITYHFPANSSSAEVSYAVEGKDEVKIKVENANVTEMMQKWYLGGSNAVSPCTVQSLAEKLGEMLSVA
	F3H	c31072.graph_c0	ATGGGATCAATTACTTTCCTTCCTACATCCTCGGAAGAAAAAACTCTCCGTCCAGATTTCGTTCGCGACAAAGACGAGAGGCCGAAAGTGGCGTATAACGAATTCAGCGACGAGATTCCGATCATATCGCTGGACGGGATCGACGGCGATGTGAAAAGGGCGGCCATCTGCGAAAAGATCGTCGAGGCGTGCGAGGATTGGGGGATATTTCAGGTCGTGGATCACGGCGTCGACGGCGAGGTCATAGCGGAGATGACGAGGATGGCGAGAGAGTTTTTTGCCTTGGCCCCAGAGGACAAGCTGAGGTTCGATATGTCCGGCGGGAAAAAAGGCGGATTCATCGTGTCTAGCCACCTTCAGGGTGAAGCAGTACGAGACTGGAGGGAGATTGTGACATAC…	MGSITFLPTSSEEKTLRPDFVRDKDERPKVAYNEFSDEIPIISLDGIDGDVKRAAICEKIVEACEDWGIFQVVDHGVDGEVIAEMTRMAREFFALAPEDKLRFDMSGGKKGGFIVSSHLQGEAVRDWREIVTYFSYPIRARDYSRWPDMPGGWISVVEKYSEKLMELSCKLLGVLSEVMGLDHEALTKACVDMDQKIVVNFYPKCPQPDLTLGLKRHTDPGTITLLLQDQVGGLQATKDGGKTWITVQPVEGAFVVNLGDHGHYLSNGRFKNADHQAVVNSNCSRLSIATFQNPAPDAIVYPLAIREGEEPIMGEPITFAEMYRRKMSRDIEQAKLKKLAKVDKPEALYKNVNVVAQPEALSEILA
		c28316.graph_c0	ATGGCCCCTGTTCCTTCCAAGCTTCTTCTTAGTGATATTGTATCGGGATGTACTTCTGTTCCTTCTAACTATGTTAGGCCTAGCTTTGACAGGCCAAATTTGTTAGATGTGGAGGATTCGGCCGCCTCGTGGATTCCTGTTATAGATATTGGAGGGATTGCTGGACCGGACCGATGGCAAGTAGTCAAGAACATTGGCTCGGCTTGTCAAACTGACGGGTTCTTTCAGATAAAGAACCACGGTATATCTGTGGACATGATTAGTTCAATGATACGCATTGCCAGGGAGTTCTTTCGCCTGCCAGAGTCCGAAAGATTGAAGAATTACTCGACAGATCCATCGAAACCGACGAGGCTTTCAACAAGTTTCAACGTGTCCACCGAAACAGTTAGTAACTGG…	MAPVPSKLLLSDIVSGCTSVPSNYVRPSFDRPNLLDVEDSAASWIPVIDIGGIAGPDRWQVVKNIGSACQTDGFFQIKNHGISVDMISSMIRIAREFFRLPESERLKNYSTDPSKPTRLSTSFNVSTETVSNWRDYLRLHCHPLEDFVLGWPSNPPNFREVVGEYSKKVRELALILLEAISESLGLEKDYMEKALGKQAQHMALNYYPPCPQPELTYGLPGHKDPNAITLLLQDGVSGLQVFRNGKWIAVKPIPDTFVINIGDQVQVLSNDRYMSVLHRAVVNSSSERISIPTFYSPSPDAVIKPPEALIDEEHPSSYQSFTYQEYYNKFWNNGLHSASCLDLFRQT
		c30178.graph_c0	ATGGCGGAGCAGCAATTGCTATCAACTGTCGATAAGCACACCAGCCTGCCCGAGAGCTACGTCCGGCCCCTGCCCGAGCGGCCTCGACTGCATGAAGTAAAGCCTGACCGCAGCATCCCGATCATCGACTTGAGCTGCCCCGACAGACGATGTATTGTCGAGCAAGTGGGCAACGCTTGCCAGTCCCACGGCCTCTTCCAGGTTGTAAATCATGGAGTGGCGACGGAAGTCATGTTGAAAATGATGGCAATAGCCGCCGAATTCTTCCGGCTGCCTGCGGAGGAGAAGATGAGCTTTTATTCAGATGACCCGGCGAAGAAAATGAGGCTTTCGACGAGCTTTAATGTGAGGAAAGAGAAGATACACAACTGGAGAGACTATCTCCGGCTCCATTGCTAC…	MAEQQLLSTVDKHTSLPESYVRPLPERPRLHEVKPDRSIPIIDLSCPDRRCIVEQVGNACQSHGLFQVVNHGVATEVMLKMMAIAAEFFRLPAEEKMSFYSDDPAKKMRLSTSFNVRKEKIHNWRDYLRLHCYPTEVFVPGWPDKPSSFREVVSTYCKEVRLLGFRLLGLISLSLGLEEKYIERILGEQEQHMAINYYPLCPEPELTYGLPAHTDPNALTILLQDSNVAGLQVLREGRWFAVDPHPEAFVINIGDQLQAISNGRYRSVWHRAVVNSNNERMSVASFLCPCNSAVISPARKLTGDGTPAIYRSYTYDEYYKKFWSRNLDQEHCLELFKGDSDPTVVKSTGESNE
	F3'H	c34619.graph_c0	ATGGCTCCTCTGTTGGTCTTTCTTTATACTCTCTTTTTCTCATCCGTTCTCTACTATATTTTCTTTACAAGGAAAACAAATGGCCATTCTCCTCCTCGACCGCCCGGTCCAAAAGGTTGGCCTATCTTGGGCAACCTTCTACAGCTCGGCACGAAGCCTCATCAAACTCTCTGTGCTCTTTCCAAGGTTTATGGGCCGCTCTTCAGTCTCCGTTTCGGTTCTGTGGATGTCATTGCTGTAACTTCTGCTGATGTTGCTGCTCAGTTCCTTCGCGCGCACGACGCAAATTTTAGTAACCGACCACCAAATTCCGGTGCCGAACACGTCGCCTATAATTATCAGGATCTAGTATTTGCTCCCTACGGCCCACGGTGGCGAATGCTCAGAAAGCTCTGTGCA…	MAPLLVFLYTLFFSSVLYYIFFTRKTNGHSPPRPPGPKGWPILGNLLQLGTKPHQTLCALSKVYGPLFSLRFGSVDVIAVTSADVAAQFLRAHDANFSNRPPNSGAEHVAYNYQDLVFAPYGPRWRMLRKLCALHLFSPKALDDLRPVRAGEVAILANTLYNHAQTHGEANLGELLTICTTNALSKAMLGLRVFGEAGNGASDFKELVIELMRLAGTFNIGDFLPWLRPFDLQGVVGKMKNVHQRFDTFLSKVIEEHRMADAKGDNLLSVLIRLMEDTESDGGELTNTSIKALLLNLLTAGTDTTSSTVEWALAELIRHPEILKKAQTELDLVVGSNRLVSEADLPNLPFLHAIVKETFRLHPSTPLSLPRMSSESCKVNGYHIPQNTTVLINIWAISR…
		c37588.graph_c0	ATGGATCTCCAACCATGGGCCGTTTACCTCTTCATCTGCATCTCCACCATCCTCCTCCTCCTCAAATTCACCAACAACGGTCGACGCATCAAGCTACCACCGGGCCCAAAACCATATCCAATCATCGGCAACCTCAACCTCGTCGGCAGTCTCCCTCATCGCTCCATCCACAACCTCTCCTTAAAATATGGCCCCATCATGCAACTCAAATTCGGCTCATTCCCCGTAGTCGTGGGCTCATCCATGGAGGCGGCACGCTTCTTCCTCAAAACCCACGACGTCATCTTCGCCTCCCGCCCAAAAACCGCCGCGGGGAAATACACAACTTACAACTACTCCGACATAGTATGGTCACCGTACGGTGCTTATTGGCGCCAGGCCAGAAAGATGTGCCTGACT…	MDLQPWAVYLFICISTILLLLKFTNNGRRIKLPPGPKPYPIIGNLNLVGSLPHRSIHNLSLKYGPIMQLKFGSFPVVVGSSMEAARFFLKTHDVIFASRPKTAAGKYTTYNYSDIVWSPYGAYWRQARKMCLTELFTAKRLESFEYIRVEELHNLLRELFLSSNKTIVLKDFMSTVSLNVISRMVLGKKYLDEGAAEGAVVTPDEFKRMIDELFVLNGVLNIGDSIPWLDFLDLQGYVKRMKVLSKKFDRFLEHVLDEHDERRREEGQRFVVRDMVDVLLQIADDPGLEVKLNRAGVKGFTQDLIAGGTESSAVTVEWAISELIKRPRIFEKANEELDREIGKGRWVNEKDLLRLPYIESIVKETMRMHPVAPMLVPRLAREDTTFAGYDIPAGTRVLV…
	DFR	c35393.graph_c2	ATGGAGGAGAGCGTAAGAGTATGTGTTACAGGAGCTTCAAGTTATATTGGGTCTTGGCTTATCAATAAGCTTCTACTGAAAGGCTACACAGTTCATGCTACTCTAAGAAACTTGGGTGACGAATCTAAAGTTGGACTTTTGAAGAGCCTTCCTGAAGCTGAGAGAAGGCTATTGCTGTTTCAGGCTGATATTTATAATGCTGAAGAATTTGAACCTGCAATCCGAGGGTGTGAGTTCGTGTTTCTTGTTGCTACTCCGACAGTACAATCTGAAAGTGCCGATAGAAGCAAGTATAAAGACACGACGGAAGCTGCAGTTGCCGCGGTGTCATCCATCTTGCAGTTTTGTGAACAATTAGGATCAGTTAAGCGTGTTATCTACACTGGTTCTGTCACAGCT…	MEESVRVCVTGASSYIGSWLINKLLLKGYTVHATLRNLGDESKVGLLKSLPEAERRLLLFQADIYNAEEFEPAIRGCEFVFLVATPTVQSESADRSKYKDTTEAAVAAVSSILQFCEQLGSVKRVIYTGSVTAASPLKEDGTGFSDFIDESCWTPLHLSFAHCDVFLKSYVSSKTLSEYELLNYKSTKENSGMEVVSLACGLVGGDVILPNAPLSVQQLVSPLTGDPLCYNLQKFLEALVGSIPVIHIEDLCDAHIFCMEKSSVSGRFLCASAYPTLQQIVEYYEEKYPFKRVPKEFEGTEIWVRCGSQKLAEVGLKYRYGLEQILDDSVECMKRLKGLAGL
		c26216.graph_c0	ATGAAAATATTAGTAACCGGCGCATCTGGTTACCTCGGTGGCGCACTCTGCGGTCAGCTCATCGCAGATGGCTACGAAGTTCGTGCCTTCGTGCGCCGCAGCAGCGATCTATCTGCTCTCCTCCCCCTAAATCCAAACCCTAACCTCGACTTCGCCTACGGTGACGTCACCGACTTTGATTCTCTGATGGAGGCGCTCTCCGGCTGCCACGTCGTCTTCCACGCCGCCGCCCTCGTCGAGCCGTGGCTTCCAGATCCTTCTCGATTCTTCGCCGTTAATGTTGGAGGGTTGAAAAATGTTTTGGAAGCTTGTAAGAAGATTGAGTCGGTGGCGAAGATAATTTATACGTCTTCATTTTTTGCGCTTGGATGTACTGATGGATATGTTGCAGATGAAAAT…	MKILVTGASGYLGGALCGQLIADGYEVRAFVRRSSDLSALLPLNPNPNLDFAYGDVTDFDSLMEALSGCHVVFHAAALVEPWLPDPSRFFAVNVGGLKNVLEACKKIESVAKIIYTSSFFALGCTDGYVADENQVHQGKVFCTEYEKSKAIADRVAMEAAREGVPIILLYPGVIYGAGKLTSGNIVAQILIERFNGRLPGYIGHGNDKFSFSHVEDVVKGHIAAMHKGRIGERYLLTGENASFKHVFDIAAVITNTKRPWLHIPLWLIEIYGWISVFFAQITGKLPLISYPTVRVLGHQWAYSCQKAREELGYEPRSLKEGLEEILPWMKSLGLIRY
	ANS	c34412.graph_c1	ATGGATCTTCTGCATGACTGGCCCGAACCAATCACCCCCGTCCAATCAATCTCCGAGAGTGGCGCCCATGCGATCCCTGACCGCTACATAAAGCCCCCGTCAGAACGTCCATCAGCAGACTGTGAAGCCGGTTTGTCTGGGAGAGACCTGAAAATACCAGTGGTAGACCTAAAAGGCCTCAAGGGCGGCGTGACGGAGTGTAGGGCAACAATGAAGGCCATCTCGGACGCCTGCAAGGAATGGGGATTCTTTCAGGTGGTAAATCACGGGGTGAGCAAAGACCTGGTGGCCGCGATGAAGATGGTGTGGAAAGAGTTCTTCTGCCTTCCCATGGAAGAGAAGGTGAAGCTCCGGAATTCGCCCAAGACTTACGAAGGTTATGGGAGTAGGCTGGGGGTC…	MDLLHDWPEPITPVQSISESGAHAIPDRYIKPPSERPSADCEAGLSGRDLKIPVVDLKGLKGGVTECRATMKAISDACKEWGFFQVVNHGVSKDLVAAMKMVWKEFFCLPMEEKVKLRNSPKTYEGYGSRLGVEKGAVLDWGDYFFLNFLPRALRDYEKWPALPISCREITDEYGRELEKLCGTLMKVMSLSLGLDVGFLQKAFGGEDHVGACMRVNYYPKCPQPDLTLGLSAHSDPGGLTVLLADDRVKGLQVRKGDAWVTVQPVPDAFIVNIGDQIQVLSNAIYKSVEHRVMASASSERFSFAFFYNPRSDLPMCPARELVTSDRPQLYQPMTFSEYRLYIRKK
Anthocyanin modification	UFGT	c49264.graph_c0	ATGGGCATCCTCTCCGGCGACATCCACTCCGGCTTCTCCACCTTGCTCCACCGTGCCGGAAATAAGCTCCCCCATGCCGCCGCCATCGCTCTCAATACCTTCCAAGGACTCAACGCCGGCATGGACGCCGAGATTTCCTCCGTATTCAAGAAATACCTCCCCGTCGGCCCCTTCAATCTCCTCTCCCCACCGCCGGCGCAAGAAGCAGAATCCGAAAGCGATCGATCCCTTTTCTCCTGGCTCGACCGCCAGGGTCCCGCCACGGCTGCCTACGTCAGCTACGGCAACGTCATGACG	MGILSGDIHSGFSTLLHRAGNKLPHAAAIALNTFQGLNAGMDAEISSVFKKYLPVGPFNLLSPPPAQEAESESDRSLFSWLDRQGPATAAYVSYGNVMT
		c14774.graph_c0	ATGGCCGACTCCAATGGTCGTGGCAAGCCGCACATTGCCCTCATGGCCTTTCCCTTCGCCTCTCACCCCGTCGTCCTCTTCACATTCGCCCGCATGCTCGCTTCTGCTGCGCCAGGCGCTCTCTTCTCCTTCCTCACTTCCTCCCAATCCCTCGCTTCTTTTTCAAAGACTTGGAGACCCGAGAACGTGCGCCTGTACGCCGTCGACGATGGCTGCTCGGAGGTGATGGTTAACGTGGTGGAGCGGATCGGATTGTTCATCGAGGCGATGCCGGGA	MADSNGRGKPHIALMAFPFASHPVVLFTFARMLASAAPGALFSFLTSSQSLASFSKTWRPENVRLYAVDDGCSEVMVNVVERIGLFIEAMPG
		c32147.graph_c0	ATGGGATCAGGTTGCAACCGCCGCCACGTGGCGCTCCTGGCCTTCCCCTTCGGTACCCACGCCGCCCCCCTCTTCTCCCTCGCCCGCGCCCTCGCCACCGCCACCCCCTCCGCCGGCGAAGTATCCTTCACCTTCCTCACCTCCGCCCGCTCCGCCGCCTCCCTCGGCACCGCCACGTGCCCACCCAACCTCAGGATCTTCGAGGTCTCCGACGGCAGGCCGGAGGAGCACGCGGAGACCGTCGAGCAGCTGGTGGGGCGATTCATGGCGGCGACTCCGGGAAATTTCGAGAGTGCCATGGAGGCAGCGGTGGGAGCTACCGGGGGTTTGAGGTTCACGTGCCTGATTAGCGATGCCTTCCTGTGGTTCGTTGGGGAGATGACGGCGGGGATGGAGGTG…	MGSGCNRRHVALLAFPFGTHAAPLFSLARALATATPSAGEVSFTFLTSARSAASLGTATCPPNLRIFEVSDGRPEEHAETVEQLVGRFMAATPGNFESAMEAAVGATGGLRFTCLISDAFLWFVGEMTAGMEVPWFAIRTGGPSSLSAHLHTDLLRGKFGVEEKDASLSNGDEDLGFIRGLSGLRIRDLPDGITSGDVTGKFSQLVHMMGRKLPTADAVVFNSFQGLNSDLDLDLTSKLKKTIPIGPIHLWDPTESRPDRFNCVQWLDQIGPATVVYISFGTHVNLQPPELAELAEGLEASGFLFLWSLKDSAKEHLPAGFLDRTKDRGLVVPWVPQVEVLAHAAVGAFVTHGGWNSVLESITGGVPMVCRPFLGDQMMNARAISHVWKVGGSVRGRRD…
		c43043.graph_c0	ATGTGCCCACCCAACCTAAGGATCATCGAGGTCTCCGATGGAAGGACGGAGGGGCAGGCGGTGGCCTTCGAGCACCCTCTGGAGGAGGCGGAGCGATTCCTGGCTGAGACCCCTAGAAATTTCGAGAGCGCCCTGGAGGCAGCGGTGGCGGCCGCCGGGGGTTTGAAGTTCACGTGCCTGATCAGCGATGTGTTCCTGTGGTTCGTAGGAGAGATGGCGGCGGGGATGGAG	MCPPNLRIIEVSDGRTEGQAVAFEHPLEEAERFLAETPRNFESALEAAVAAAGGLKFTCLISDVFLWFVGEMAAGME
		c36923.graph_c0	ATGGTGAGTCCCAATAGTTTTGATTCATCTACTCCTCTTCATGTAGTTGTGTTCCCCTTTTTTGCATTTGGTCATATAAGTCCATTTGTTCAACTTTCCAAGAAGCTCTCTTCAAATGGAGTCAAAATCTCATTCTTCTCTGCTCAAGGCAATGTTGATCGCATCAAAACAATGTTGGATAAATCAACTACAACTAATATTGTTTCTTTAACTTTGCCTCATGTTGATGGTCTTTCTCCAGGCCTTGAGAGCACATCAGAATTGAGCCCTGCTTCAGCTGAGCTTCTCAAGGTTGCATTAGATCTCATGCAACCTCAAATCAGGACCCTTTTGTCTGAATTGAAGCCCCATTTTGTTATTTTTGATTTTGCTCAAGATTGGCTTCCAAGATTAGCTTCT…	MVSPNSFDSSTPLHVVVFPFFAFGHISPFVQLSKKLSSNGVKISFFSAQGNVDRIKTMLDKSTTTNIVSLTLPHVDGLSPGLESTSELSPASAELLKVALDLMQPQIRTLLSELKPHFVIFDFAQDWLPRLASELGIKTVFYSVFIALATAFVTVPDRIDPETKSPPTLEEMKNPPPNFPKTSVTSLRTFEALDFLYIFKSFNGGPCVYDRVLTGLKDCSAILAKTCKEMEGDYIKYVESQFDKPVLLVGPVVPESTSCVQLEEKWANWLNQFTPNSVIFSSFGSETFLNDDQIREVVLGLELTGLPFFLVLNFPANLNVSDELNRLLPQGLLGRIGGRGMIHSGWVQQQQILAHKNVGCYVCHGGFSSVMEALVNDCQLVMLPQKGDQFLNAKLVCQD…
		c33867.graph_c0	ATGGCTCCTCCGCATTTTGCCCTCCTCCTGTCGGCCGGCATGGGCCACCTGACCCCCTTCTCCCGACTCGCCGCCCTCCTCTGCTCCTCCGACTGCCAAGTCACCTTCCTCACCGCCCACCCCCCGGTCTCCTCCGCCGAATCCCGTCTCCTCTCCCGCCTCCTCTCGCTCTTCCCCCAGATCCATTCCCTTCCTCTCCCCCTCACTCAACTCGACCCATCTCACTTCTCCTCCGACGCCGACCCCTTCTACCTCCGCTACGAATCCATCCGCCGCTCCTCCCACCTTCTCCGCCCCCTCCTCTCCTCATCCTCCTTCTCCGCCCTCATCGTCGACGTAGGCCTCGCCTCCGAATTCATCCCCGTCGCCAGCGCCGTCGGCATCCCCTGCTACGTCTTC…	MAPPHFALLLSAGMGHLTPFSRLAALLCSSDCQVTFLTAHPPVSSAESRLLSRLLSLFPQIHSLPLPLTQLDPSHFSSDADPFYLRYESIRRSSHLLRPLLSSSSFSALIVDVGLASEFIPVASAVGIPCYVFFTTSAALLSFYSYFPTYITSRDDDVIGDVDVPGLWTVPRRSVIPFLHDKDNFVRRQFIENGVSFLKADGILVNTFEGIEGETLKALNEGRVVSGLPPVIAMGPLTPIDRTGSGRECNFVRGWLDGQAERSVVYVSFGSRTAMTGEQIKELGEGLEKSRCRFLWVIKTKKVDRDEEEADLEEMLGEGYVERVKERGLVVNGWVEQEEILSHRAVGLFLSHCGWNSAMEAAGFGVRVMAWPRGADQRVNGEVVRRCGLGVWMEDWSWE…
		c38209.graph_c1	ATGTCATCACAGGATGATGTTGGCAAAAGCCTCAAGATCCTCTTCTTCCCTTTCATGGCCCAAGGCCACATGCTCCCCATGGTCAACATCGCCAAACTCTTCGCCTTTCGCGGCGTAAAATCCATCATCCTCACAACGCCCGCCAACGCTTCCTTCATCGATCCATACATCGATCACCCGAACATCCAACTCCACATAACCCCATTCCCTTCTTACCCGGGACTCCCGGAAGGTTGCGAAAACGCCTCCTACTTGACAACCACCGACCCGGAGGTGAGGTTCGGTTTCTTCGAAGCCTTGGCCATGATGCGCCGGCCGTTCGATTCGCTCCTCGGAGAGCTCTCTCCCGATTGCGTCGTGACCGACATGTTCCTTGCATGGACGTTGGATGTCGCGACC…	MSSQDDVGKSLKILFFPFMAQGHMLPMVNIAKLFAFRGVKSIILTTPANASFIDPYIDHPNIQLHITPFPSYPGLPEGCENASYLTTTDPEVRFGFFEALAMMRRPFDSLLGELSPDCVVTDMFLAWTLDVATEHGIPRLMFHGTSYFSRCVFHNLYKYKPLDNLPADADSFVVPDLPHEIRMLVSQIDQARDKDPRRSGFFAKIGESEEKSYGVVMNSFYELEPDYVRHYRDVIGRKAWHIGPVSSCINTRESDASITNWLDGKSPESVVYVCFGSMTEFSKDHIREMAIGLEASGHPFVWVVRVNGEDILPDGFEERTQGRCLVIRGWAPQVSILNHEAVGCFVTHCGWNSSLEAISAGVPLVTWPLFADQFSNERLIVDVLEIGVGVGVKNYSRSV…
		c14709.graph_c0	ATGATCCCTTTACTTGATGTCGCCGGCCTTCTCTCCCAACGCGACGACGTCTCCATCACAATCATAACGACCCCTGGAAATGAACCTTTTGTCCAACCCGTAGTCACTCGCTCCGCCGTCTTATCCAAGCACCCCATCAAACTCCTACTCATCTCTTTCCCTTCCGATGTCCATCATCTCCTCCCCTCCGGTAAAGAGAATATATCCTTAGTTCCCTTCTCCTCCTTTTCCAACATCTTTACTGCCGCTGTTTCGCTCAATCAACCTCTTCGCAAACTACTCGAGCTCCACCGCCCCGATTGCCTCGTCTTCGACATCGTGTTCCACTGGGCAGCAGACATTGCTCAGGACCTCTCCATCCCCAGCATTGCATTCTTCTATCATGGAATCTTCTCCCTT…	MIPLLDVAGLLSQRDDVSITIITTPGNEPFVQPVVTRSAVLSKHPIKLLLISFPSDVHHLLPSGKENISLVPFSSFSNIFTAAVSLNQPLRKLLELHRPDCLVFDIVFHWAADIAQDLSIPSIAFFYHGIFSLCVERLLDIHAPHQTSDAFVVEGLPHQVELTRSKIPEIFFVPGLRESRRESEKKTFGIIVNSFYDLEPEYGDLLRKQAPDHRAWFVG
		c27678.graph_c1	ATGTCCCGTGAAATTTTAGTAGTGCCATTTCTACACCCAGGCCATCTTTTTCCCGCAACCGAGCTCTGCAACCAACTCGCTAGCCGAAATTACAAGATTACCCTCCTCTCCTCCTCCTCCCCATCATCATCTCTCCATCCATCAATCCAAATCGTCGAAATCCTCCTCTCCGATTCCATCCAATTCCAACCTCAAATTCTCGACGAAGCACTCTCGAAGCACATCAAAGATTATTTCGACGGCCGGAACCCGTCCGATTTCCCGATTTGCGCTATCGTGGACGAAATGATCAGTTGGCTTATCGACCCGCTGCTAGAATTCCGAGTCCAAGTCGTCAGTTTCTTCACATCGAGCGCCTCGTCGGCTGCGCTCGGCCACGCGATGGATAGGACTTCGACT…	MSREILVVPFLHPGHLFPATELCNQLASRNYKITLLSSSSPSSSLHPSIQIVEILLSDSIQFQPQILDEALSKHIKDYFDGRNPSDFPICAIVDEMISWLIDPLLEFRVQVVSFFTSSASSAALGHAMDRTSTDELTLGKILAVPGLPEEMALTSSSLASRRASGPRRNGGRPRRRGLEASDGAIALIFNTCEDLESPFLDYVAKETGKPVWGVGPLLPARFKDGDVRLRRESNVREDEVLEWLDSKPRGSVIYVSFGSLVNPTDEELDELANGLEESGRPFIWVVQPNPKRHDPSGQAIEGGGGGSYFPVDVAGRVGPEGLIIRGWAPQLLILSHRSTGAYVCHCGWNSTVEAMGCGVPMLTWPVRGDQHHN
		c36255.graph_c0	ATGGGAACCGTAGTTCATCGCCCACTCCGTGTTGTCTTCCTCCCCTTGCCATGCCCAGGCCACATGATCCCCACCATCAACATAGCCATACTCTTCGCTCGCCGCCCCGACGTCTCCGTCACCATCATCACGACCCCGGGCAACGAGCACCGTGTACGCCCCTCCATCGTATCCTCCCCCATCGAGCTCCTCCTAGTCCCGTTCCCTTCCTCCGTCGCCCACCTCCTCCGCGACTCGGAGGAGAATCTCTCGTCTCTCACTAATTCCGACTTCCCCGACTTCTTCACCGCCTTCTACGCCCTCCAGCAACCCATCGAGGAAATCCTCTACGACCGCCAACCCGACTGTATCGTTTCCGATTACATGTTCACGTGGACTTCGGACACGGCCCTGAAATTG…	MGTVVHRPLRVVFLPLPCPGHMIPTINIAILFARRPDVSVTIITTPGNEHRVRPSIVSSPIELLLVPFPSSVAHLLRDSEENLSSLTNSDFPDFFTAFYALQQPIEEILYDRQPDCIVSDYMFTWTSDTALKLNIPRVLFYGHGIFASCVHDRLERDAPHTRVSDDSEVFVVEGLPRRVEMTRPEVSSGVVYATDAMRESVEKSYGILVNSFYELEAEFAELHRRKLGGRAYYVGPVSSFDKEKADRGQNLGPNVDGLMTWMDSIERGSALYVCFGSLNQFSADQLREIALGLEASGNKFVWAVKNIDTAEWLPEGFEERTKGKGVVIRGWAPQVVILNHSAIGGFMTHCGWNSTLESISAGVPMVTFPVEYEQFLNEKLITKVLAVGVNVKREGVKRV…
	3RT	c53224.graph_c0	ATGTCTGCTATGGATCTCACACGTGATCAAGTTGAAGGTGTGGTCCGAGCCGTGGAACCGGACCTGATCTTCTTTGACTTCGCTCATTGGATTCCAGAGGTAGCTAGA	MSAMDLTRDQVEGVVRAVEPDLIFFDFAHWIPEVAR
	5GT	c37200.graph_c1	ATGGAGGAGACTCGACCGCAGCAACATTTCCTTGTTGTCACGTTTCCAGCGCAAGGCCACATCAACCCGGCGATCCACCTGGGGACTTGCATCGCGAGGATCACCGGGGCCCGCATCACCTTCTCAACCTGCATCTCGGCTCACCGCAAGATGTTCCCCGACCTCGACGCGCCCGACCAAGAAATCACCAACGGTCCCATCACCTACCTCCCCTTCACCGACGGCTACGACGAGGGGTTCAAGCGCGGGGTCGACGATCCGAACCACTTCCTCTCCCAGTCTGGCATCATCGGTCCGAAGTCCTTCTCTTCGATTATCGACAAGCTGAATTCCGATGGCCGGAGGGTCGATTGCGTAATTTACAACTTCATGTTGCCGTGGGCCGCCGTCGTGGCGCGT…	MEETRPQQHFLVVTFPAQGHINPAIHLGTCIARITGARITFSTCISAHRKMFPDLDAPDQEITNGPITYLPFTDGYDEGFKRGVDDPNHFLSQSGIIGPKSFSSIIDKLNSDGRRVDCVIYNFMLPWAAVVAREHGIPSAEYWVQAATVFAIYYHAFHGYDAIIAEVSRDPSSSVKLPGLPPLQIRDLPSFFTAPSSSAAEIITSAILGNIKGSFLNLDIERSTTRQKPKVLVNTFDELEVNALSAVADLDLIAVGPILQPFQEDNANKAASGFDLFKADEKAYMDWLDSRPKETVVYVSFGSMSVLKKEQIEEILSGLKASGHPFLWVVRKDSRYEGFEEEEIGEEGMIVEWCSQVRVLSHASVGCFVTHCGWN
		c29151.graph_c1	ATGATCTTCGCCATCATCCGCAACATCAAGGCTTCATTCGTGAATCTGGATAGAGAGCGAGCGTCGACCGGGCACAGACCAAAGGTTCTGGTCAACACGTTCGATGAATTAGAGGCCGATGCTCTGCTGGCCATCGACGACTTGGATCTGATCGCCGTGGGTCCTATCTTACAACCGTTTCCCGAAGATGACACTAAGATCGCGTCTGGTTTCGATCTGTTCGAGCCCGACGAGAAGGCGTACATGGAGTGGTTAGACTCCAAACCAAAGAAAACAGTGGTGTACGTATCGTTCGGGAGTCTATCGGTGCTGAAGAGGGAACAGATGGAAGAGATGCTGTCGGGGTTGAAGACGAGCGGACGCCCGTTCTTATGGGTGGTGAGGAAAGACGGCAGGTAC…	MIFAIIRNIKASFVNLDRERASTGHRPKVLVNTFDELEADALLAIDDLDLIAVGPILQPFPEDDTKIASGFDLFEPDEKAYMEWLDSKPKKTVVYVSFGSLSVLKREQMEEMLSGLKTSGRPFLWVVRKDGRYEGFEE
		c31056.graph_c0	ATGGCCAGCCACCAGCCACGCCACCATTTCCTCGTGGTCGCCTTAGGCCTCCAGAGCCACATCAACCCTGCCCGCCACCTCTCCCTCCGCCTCTCTCGAACCGTGGACACCCACGTCTCCATCGCCATCCCTGGCCCCATCCTCACCAAAATGTTCCCCTCATCCAAAACCGAAGAAGAATCCAATTCCATCGTCGACGAGGAGCAAGAATCCATTTCTTACATTCCATACTCCGACGGTAGCGACGCCGGACTCCACCCCGGCCTCAACATCCGGGACATTCCCGCTTGGAAGAAACACGTCGCCGAGAGCCTCAGGCGCATCATGCGCAATCGTGGCATTACCTGCGTCATCCACACGCTGTTTCTTCCGATGGCTGCGGAGGTGGCATGTGATCTC…	MASHQPRHHFLVVALGLQSHINPARHLSLRLSRTVDTHVSIAIPGPILTKMFPSSKTEEESNSIVDEEQESISYIPYSDGSDAGLHPGLNIRDIPAWKKHVAESLRRIMRNRGITCVIHTLFLPMAAEVACDLDIPSVLFWIQPASLFTIYYHYYLSVDFDSSRDLSFLLELPGLPRLQIGDLPQFLTANYATNSDDVTNALDYLIFSLFQDLFLLIKQNMPSGSKTKVLINTFYDLEPTVLSSFKSAVEMIPIGPLVSLNISANSTNIDLFEQDKSAYMDWLDTKDANSVVYVSFGSHTVLSKKQTSELFKGLEESGIPYIWVVRKDTTGVSLESIRNGMTVEWCNQTRVLSHSSTGCFVSHCGWNSMVESLVSGVPMVTMPQWSDQGVNSKLGEERG…
	AA7GT	c15884.graph_c0	ATGTTTGCATTAGGCGGTTATGGTAAAGGTTCCTTCCCCCCCAAGCGATGTTCTCATCCGTTCGGCAATTGCCTCACCGGAAATTCCACAGTAGAACCGTACATTGTGGCCCATCATATGTTGCTTGCACACAGTTCAGTAGCTTCATTGTACAAAAAGAATTATCAGGCCAAGCAGAAGGGGCTCATAGGTTTGAATCTCCACGTATTCTATTTGCTTCCAAAAACAAACTCAGCAGAGGATGTAAGTGCGACAAAGAGGGCCCGAGACTTCCTTACTGGCTGGTTCGTCGGGCCTCTTGTGCATGGAGATTACCCCAAGATTATGAGGATGGCCGCAGGAAAGAAGATGCCGATATTTTCGTGGAAGCAATCAGAACAGCTCATGAATTCGTTGGAC…	MFALGGYGKGSFPPKRCSHPFGNCLTGNSTVEPYIVAHHMLLAHSSVASLYKKNYQAKQKGLIGLNLHVFYLLPKTNSAEDVSATKRARDFLTGWFVGPLVHGDYPKIMRMAAGKKMPIFSWKQSEQLMNSLDFLGVNYYVTLNVEDKPNYVSADRRDFIGDMSAYVGGLLEQGEGLSENEIYAPYGLQGVLEYFKQTYGNPPIYIHENGYPMPINATLNDAPRVKHMNEHLESLHDAIKNGSNAKGYFTWSFVDVFELFGGYSSTYGLYHVDFEDKERRRKPKLSAQWYANFLKRSQNRVDIGSTSSYVPQVS
	5MaT1	c32884.graph_c0	ATGAAACCAGTTCAGATGCTCCTGCTCTACTCTAATCCTACTACCAAACTCTTTTTCCCTACCATTGTTCAGAATCTTAAATCCTCGCTTTCTTCGACCCTTCTTGACTTCTTACCGCTTGCCGGAAAGCTGACCCACGTCCCGTCCACCGGGGACGTCGAGATCGACCTCTCTGACCCAAGTTTTATGTTCATCCAGGCCGAGTCTGATCTCGACATCTGCCAACTTGCCAAGGATGAGGCCCACGATGTCGAATACTTCTTGAAACTCGTCTCTAAGATTGATACAACCGAGCTGCCCTTCTCGGTGTTTGCAGTACAGGTGACGAGATTCAATTGTGGCGGGGTATCCCTCGGATACGCCGTCCATCATTGTATTGCAGACGGAAAAGCTCTTTTC…	MKPVQMLLLYSNPTTKLFFPTIVQNLKSSLSSTLLDFLPLAGKLTHVPSTGDVEIDLSDPSFMFIQAESDLDICQLAKDEAHDVEYFLKLVSKIDTTELPFSVFAVQVTRFNCGGVSLGYAVHHCIADGKALFQFIGAWTNACKIKMNGNDIMLTESLRKPLYARTMINHPKGEMIARQILRDTCPILPSTNDPFFTSIKAKVRPLSRRTFILDAPTIKYLKRRGMQPGDGILTAHPPSTFSAISAFVWACIAQSKSFSSNDETVFTFLMDCRAQLNPLIHEGYFGNCVRPVFARLLVRDLTAKEGLFSACKAIRRSIDEVSKDPLRDCENWVASFKTLLWDRVVNVNASPKFRPYEADFGRGT
		c43691.graph_c0	ATGGAGGTGAATTCCTTCACATCTGTCAAAGCATGGAGCCGCCGCCAACTCAGCCGACGAACTTTCATTCTGGATGCACCAACTGTCCAATCCTTAAAGAGGGGAGGCATGCAACACGAAGACGATCGTCCACCTTCAACTTTCTCCGTTATTTCAGCCTTTGTTTGGGCCTGTATTGCCCGATCCAAATCGTTCAGCGCAAATGAAGAAACAATCTTGATGTTCTTAATGGATTGTCGAGCCCGACTCGACCCACCGATCCACGAAGACTACTTTGGAAACTGTGTCCGT	MEVNSFTSVKAWSRRQLSRRTFILDAPTVQSLKRGGMQHEDDRPPSTFSVISAFVWACIARSKSFSANEETILMFLMDCRARLDPPIHEDYFGNCVR
	UGT75C1	c24886.graph_c0	ATGCTCATGGAGAAGGCGTGGGGGATGGGTGTAAGGAGTGAGCTTGATCAAGACGGTCTTCTGAAGAGCATGGAGCTGAAGAGGTGCTTGGATTTAGTTCTGGGGGAAGGAGAGGAAGGGGAAGAGATAAGAAAGAGAGCAGATTTTTGGAAGGGGAAGGCGGCGGGTGCTGTGGGTGGAGGAGGATCGTCTTATCGTAATATAACGTCCTTTGTTGAAGAGATTGTAAAATCTCAAACAACGATG	MLMEKAWGMGVRSELDQDGLLKSMELKRCLDLVLGEGEEGEEIRKRADFWKGKAAGAVGGGGSSYRNITSFVEEIVKSQTTM
		c37200.graph_c0	ATGCTCATGGAGAAGGAATGGGGGATGGGCGTAAGGAGCGAGCTTAACGAAGATGGCCTTTTGAAAAGTGAGGAGTTGAGGAGGTGCTTGGATTTGGTTCTGGGGGAAGGAGAGAAAGGAGAGGAGATCAGAAAGAAAGCTGATTTGTGGAAAGAGAAGGCGGCAGATGCTGTTGGTGAAGGAGGCTCGTCTTATCAGAATCTAAGATCCTTTGTTGATGAGATTGCAAAATCTCAAACAACGGTT	MLMEKEWGMGVRSELNEDGLLKSEELRRCLDLVLGEGEKGEEIRKKADLWKEKAADAVGEGGSSYQNLRSFVDEIAKSQTTV
	GT1	c35993.graph_c0	ATGAAGGAAACAGTAGTTCTGTACCCAAGCTTAGGCATGGGTCACCTGATCCCAATGGTTGAACTTGCCAAGCTCTTCATCAACCACAATCTCTCCGTTGTCATCATCGTCCTCGGATCCCCCTTCAAAAACACTTCATCGTCCATCGATCCCTTCATAGCTCGTGTCTCCTCTGACTATCCTTCCATATCTTTCCACCATCTTCCAAAGCCAGAACTTCCCTCACCTCCTCATTTCGGCCTCGTCCTTCATCTCATACGTCTCTCGAATCCTTTCGTCTCCGATTTCCTCAGCACTCTATCGCTGACCTCCAACATCCGCGCCGTCATCCTCGACATGTTCTGTGCTGCAGCCCTTGATGTTGCTAATGAGCTCCGCATTCCGTCATATGTCTTCTTC…	MKETVVLYPSLGMGHLIPMVELAKLFINHNLSVVIIVLGSPFKNTSSSIDPFIARVSSDYPSISFHHLPKPELPSPPHFGLVLHLIRLSNPFVSDFLSTLSLTSNIRAVILDMFCAAALDVANELRIPSYVFFCSSASSLSASLFVPTLQSQTEASIKDLGDRPLHIPGLPPIPASHMPDGMTDRDNESHKAVMSNMLRLPDADGILINTFEALEPRGVQAVVEGLCVPGRTMSRIYCVGPLIADRSHEEEGIEKHECLKWLDTQPKGSVVFFCFGSWGSFPAEQLKEIAYGLEKSGQRFLWVVRSPRSEDPKKHFEELPEPDLDVLMPEGFLERTEGRGMVVKSWAPQAAVLVHESTGGFVSHCGWNSILEAVSAGVPIIAWPLYAEQKMNKVFLTEE…
		c28109.graph_c0	ATGGGTCCTGCAAAGCTGGAGATCCCGGGGGTTCCTCCCGTGCCTGCTGACCACATGGCTCTACCGCTGCTCGACCGTGACGATCCAGCTTACGAAGGATTCCTCTACATGGCTAAAAGGTCGAGAGAGGTGAAAGGGTTCATTATAAACACGGTGGCGTCGATTGAGAAAAGAGCTGTTGATGCACTTGCAGCTGACCCTAACAATCCTCCTCTCCACTGCATAGGTCCGCTTATCAATACTTCTGAGAACAAGGAAAAAATTGACGGGTCGGAGTGCATGAGTTGGCTTAACACGCAGCCGAAACAAAGCGTCGTGTTTCTCTGTTTTGGCAGTCTGGGCCTTTTCTCTGCCGAGCAGGTAAAGGAGATTGCTATCGGGTTGGAAAAGAGCGGGCAG…	MGPAKLEIPGVPPVPADHMALPLLDRDDPAYEGFLYMAKRSREVKGFIINTVASIEKRAVDALAADPNNPPLHCIGPLINTSENKEKIDGSECMSWLNTQPKQSVVFLCFGSLGLFSAEQVKEIAIGLEKSGQRF
		c34341.graph_c1	ATGACAAACTCAAGAGAAACAGTAGTCTTGTACCCAAGCTTGGGCATGGGGCACTTAACCCCGATGGTCGAACTCGCCAAACTCTTCATCGCCAGTAATTTCTCTGTCATCATCGCCCTCGTCGAGTCTCCATTAATCCCTCCAATCACCTCCACCTTCATCTCCGGTGTCTCCTCCGCTTACCCTTTGATCTCCTTCCACCACCTGCCGGAAGTCAACCCTACGAAACCGTCTCCTGACCTGTTCATGACGATTTCCCAACTCATTCGTCTCTCGAACCCTCACCTCCATGACTTCCTTTCTTCACTCTCCCAAACCGCAACCATATCTGCATTAGTATTCGACATGTTCTGCACTTCTGTGCTTGGAATAGCTAACGATCTCAATTTAAAGGCCTAC…	MTNSRETVVLYPSLGMGHLTPMVELAKLFIASNFSVIIALVESPLIPPITSTFISGVSSAYPLISFHHLPEVNPTKPSPDLFMTISQLIRLSNPHLHDFLSSLSQTATISALVFDMFCTSVLGIANDLNLKAYLFFASAASTLTALVLAPIIQAQTTSNLKDLGDAPLRFPGLPPIPASHMPIHLMDRSKEIYDEFSYNFKMFPKADGIMINTFESLETRAVEALKDGQVFPGRPMPPTYCIGPLTNDRQSMDHECLAWLDAQPKGSVVFLCFGSRGTFCEEQLKEISIGLERSGQRFLWVVQSPPGDDPAKPLDEILPEGFLERTKGRGVVVKSWAPQTAILGHRSVGGFVSHCGWNSTLEAVSAGVPMIAWPLYAEQKMNKVFLAEEAKLTVELKGY…
		c38781.graph_c0	ATGTTTGCCACAATCGGTAGCACCAAAAGTCCATCCTCTCCCAAAATGACATCCCACCGAACGTTGGACAACGGATCACCTTCAATAGTTCTCTACCCATCACCGGGCATGGGGCACTTAGTCTCCATGTTCGAGCTCGGCAAGCTCCTTGTCAAGCACCACAGCCTCTCTGTCACCATCCTCATCGTCGAACCTCATTACAACACCGGTTCCACCGCTCCCTTCATCTCTCGCATCTCCGCCTCCAACCCTAGCATATCTTTCCATCATCTCCCTACGGTTGTCCCTCTTCCAAACCCGTCTCCCCACCAAGAAGCCCTTGCTTTCGACCTCCTACGTCTCTCGAACCCTAACGTCTTCGACTTCCTTGTCACCTCCTCGCCATCCGCTCTCATCGTC…	MFATIGSTKSPSSPKMTSHRTLDNGSPSIVLYPSPGMGHLVSMFELGKLLVKHHSLSVTILIVEPHYNTGSTAPFISRISASNPSISFHHLPTVVPLPNPSPHQEALAFDLLRLSNPNVFDFLVTSSPSALIVDFFCIFATDVAEQLNIPTYLFFTSGANCLSFFLHFPKIHENTSMSFREMGSVKLEIPGAPSIPADHMILPLLDRDDPAYAGFLDMSRRLTGVKGFIVNTVASIEKSAVDAIAAEPSFPPLWCIGPLINSSENKEKVQGSECLSWLDKQPKQSVVFLCFGSLGLFSAEQLKEIAIGLEKSGHRFLWVVRSPPSNDPDKRFKAPPEPDLDRLLPDGFLNRTKERGFVVKSWVPQVAVLLHGSVGGFVTHCGWNSILEAICGGVPMIGW…
	3'GT	c21866.graph_c0	ATGCCCCATCATATCGAGGTGACAAAGTCTAAGATTATGCAGGGAATTATTAATCCAGACGAGCTAATTTTGCAGATTGGCGAATCTCTTGGCCGGAGCTATGGCATGATAATGAATACCGTATGTGAATTAGAACCTGAATATGTCACTATGATGAATCGTAAGGTATGGAATGTTGGTCCTGTCTCACTATGCAATCAAGGGGTGACCGACAGGGCGGTCAGAGGAGGATCAGGAGAACACTTTACTTCTGGCTTGAACTGGCTTGATAACCAAACTCCAGGATCGGTTCTCTACGTATGTTTCGGGAGCTTAGGCCGGTTCACTTGTTTGCAGCTTCAAGAGATTGCTGTGGGACTCGAGGCGTCAGGCCATCCTTTCATGTGGGTGACCAAGGGT…	MPHHIEVTKSKIMQGIINPDELILQIGESLGRSYGMIMNTVCELEPEYVTMMNRKVWNVGPVSLCNQGVTDRAVRGGSGEHFTSGLNWLDNQTPGSVLYVCFGSLGRFTCLQLQEIAVGLEASGHPFMWVTKGVGDDVGWISERLKEKGLITTGWVPQLLILNHEAVGG
		c21851.graph_c2	ATGAGCTCGTTCGCGATGCTGGCCATGGACTGCATCAAGAGGTACAGGCCGCAGGATGGCGTGGAGGGGGAGGGGGATTTTTCCGTGCCCGGGATGCCCGGGGAGGTCGTGATGAGGCGGTCGCAGCTGCCCGGGCCTCTCCGGGCGAGGGAGGCCGACGATCCGTTTAATCCGGTGATGGAGGAGATGGAGGAGGCCGAGGAGAAGAGCTTTGGAGTGGTGGTCAATAGCTTCCGAGAGCTGGAAGGGGAGTTTGGGGAGTGGCACCGCAGGTCCAGAGGAGGGAGAGTCTGGCATGTGGGTCCCGTCTCACTCCCTGGTGATATTCATATTCCGATCGATATC	MSSFAMLAMDCIKRYRPQDGVEGEGDFSVPGMPGEVVMRRSQLPGPLRAREADDPFNPVMEEMEEAEEKSFGVVVNSFRELEGEFGEWHRRSRGGRVWHVGPVSLPGDIHIPIDI
		c33256.graph_c0	ATGGACAACGAAAATCTCCACATCTTCTTCTTTCCATTCCTAGCTCCCGGCCACATGATCCCCATGGTCGACCTCGCCAAGCTCTTCGCCATTCGCGGTGTCAAATCCACCATCGTCACCACCGTTGGCAACGCTGCCTTAATAGACCCATCCATCTCTAACTCTCAGAATCCTATGATCCAACTCCTAACTCTCCCTTACCCTTCCTCTATCCCCGACAATGTTACGAAACTCCCTTCTCCCGACTTAACGCCTCCATTTCTCGAAGCCATTGACAATCTGAAGCAGCCCTTCGAACAACTCATCAACGAGCACCACCCCGACTGCGTTGTTTCTGACATCTTCTATCCATGGACTGCCGATCTGGCAGTCCAACATGCGATCCCCAGGCTCGCATTT…	MDNENLHIFFFPFLAPGHMIPMVDLAKLFAIRGVKSTIVTTVGNAALIDPSISNSQNPMIQLLTLPYPSSIPDNVTKLPSPDLTPPFLEAIDNLKQPFEQLINEHHPDCVVSDIFYPWTADLAVQHAIPRLAFHGSSAFTMVVIGIISTLKPFEGVSDEDGSFVVPEIPHRIEMVKSQLPGSVFQKDEVIVKVVQAQGQTYGTIMNTFAELEAGYVEKLKGKSWYVGPVSRCNRHTEESSSRGGKFSDSVLDCMNWLDNQKPGSVLYACFGSLGQFTDAQLREIAIGLDNGNHPYIWVLKDAEETQGWLPEGSEKGVIIRGWAPQMVILNHPSVGGFVTHCGWNSCLEGVTAGLPLVTWPLFAEQFMNERLMVDVLKLGVSVGAKICSGTKEKRTLVKN…
		c21428.graph_c0	ATGCTCAAACTTCATGAAACTGCGAGTGGTGATGATGAGCCGTTCGTCGTGCCGGGGATGCCCCATCATGTCGAGATGACAAAGTCTAAGCTTATGGAGGGAATTACTAATCCCGACGAGCTCATTGTGCAAATCGGCGAATCGTTTCTACGGAGCTATGGCATGATAATGAACTCGTTCGACGGATTGGAGCCCGACTATGTTAGAATGATGAATTGTAAGGCGTGGCATGTTGGCCCCGTTTCACTTTGCAACCGAGGAGTGATCGATAAGGTGGTTAGAGGAGGAGGATCAGGAGAAGACCTTCATCGTTGCTTGAAATGGCTCGATAGCCAGAAGGCAGGGTCCGTTCTTTACGCGTGTTTCGGAAGTTTAGGCGAGTTCACCAGTTCGCAACTT…	MLKLHETASGDDEPFVVPGMPHHVEMTKSKLMEGITNPDELIVQIGESFLRSYGMIMNSFDGLEPDYVRMMNCKAWHVGPVSLCNRGVIDKVVRGGGSGEDLHRCLKWLDSQKAGSVLYACFGSLGEFTSSQLHEIANGLEASGHPFLWVTKSLGDDGDWISEKKGLIIKGWAPQILILNHEAVGGFMTHCGWNSCLEGVSAGTPMITWPLFAEQ
		c33042.graph_c0	ATGTCGTCGACAGCGACAAGAAGTCCGGTCAGCAAGAAGCTCCGAGTGTTCTTGATCCCATTCTTTGCCCCCGGCCACATGATCCCGATGGCCGACCTCGCCACCCTCCTCTCCCGCCACCCCGGCGTGGACCCCACCCTGTGCCTTACCCCGGCCAACGCCGCGTTCATGGAGCCCACCCTCGCCCCCTGCATCGCCGTCCTCACCTACCCGTTCCCCTCGGAGGCCGTCGGCCTCCCCCCGGGCCAGGAAAACCTATCCACCGTCCCTGCGGAGGAAGAGTTCAAGGTCTACAGAGCAGTGGATCTCTCGGAGGCCGTGCACCGCGACCTCCTTTGCGAACACCGTCCCGACGTGGTGGTTGCGGATATTCCGTTCTGGTGGACTACCGCCATTGCG…	MSSTATRSPVSKKLRVFLIPFFAPGHMIPMADLATLLSRHPGVDPTLCLTPANAAFMEPTLAPCIAVLTYPFPSEAVGLPPGQENLSTVPAEEEFKVYRAVDLSEAVHRDLLCEHRPDVVVADIPFWWTTAIAKELGIPRITWHAVGVFPQVVMSSLHRNLKDIAGKDTIIVKDLPGPDIKMPVSELPEFLRSPNFLTESWENLKTAQLECYGTIVNTCYEIEPAYCDHYRKTECKRAWFVGPVALARRHNKHEETGEGCSECLKWLDGREEGSVVFICFGSWCQFKAEQLKEMAIGFENSGRSFLWAVRKSEGDWMPDDDWEKRVTGRGLVVRGWVPQVPVLEHKAVGAFLTHCGWNSALESMAAGVPMLTWPLVFEQFINERLLTEVIGAGQRVSEG…
Flavone and flavonol biosynthesis	FLS	c36592.graph_c0	ATGGGTTTAGAATTTGACCCATCGTTCATCCAAGAATCCAGTCACCGCCCGAACCCCACAATTTCCGAAGCCGGCGGCATCCCGCTCATCGACCTCTCCCCAATCCTCACCACTCCCATCCCCACCGGCGGCGACCACATCCCAGACCCCCTACAATCCCTCGTCCAAGAAGTGGAGTCGGCATGTAGAGAGTGGGGGTTCTTTCAAATCGTCAACCACGGCGTGCCCCTTGAGCTTCTGGAAGGAATCCAGTCGGTGGCGAGGGAGTTCTTCGAGCTGCCGATGGACGAGAAGCGCAGGGTGAGCAGAGACGAGGTGAATCCGCTCGGGTACTACGACACTGAGCACACGCTGGATGTGAGGGATTGGAAGGAGGTGTTTGATTTCGTGGTGAACGAG…	MGLEFDPSFIQESSHRPNPTISEAGGIPLIDLSPILTTPIPTGGDHIPDPLQSLVQEVESACREWGFFQIVNHGVPLELLEGIQSVAREFFELPMDEKRRVSRDEVNPLGYYDTEHTLDVRDWKEVFDFVVNEPIYIPAKTGDGGEVRMVEIKNQWPDYPPRLREACKEYQKAVLELSYKLLELIALSLKLPSKTFNDFFKDSTSFIRLNHYPPCPSPDLALGVGRHKDAGALTVLAQDDVSGLDVKRKSDGEWVRVKPIPNSYIINVGDMVQVWSNDKYESPEHRASVNSEKERFSIPFFFNPSYHANVKPLEELVGEENPAKYSEINWGEFFTARKNSNFKKGEENIQIYHFKKVELCK
		c24153.graph_c0	ATGGAGTTCGAGAGGGTGCAAGCAATCGCATCTCTAAGCGCAAGTCTCAACACCATACCTCCCGAATTCATACGTTCCGAGCACGAACGTCCCGACACGACAACCTACAGAGGACCGGTCCCCGAGATCCCCGTCGTCGACCTCTCCGTCGCCGACCGGACCCGTCTCACGAGAGCCATCGCCGACGCGTCGGAAGAGTGGGGGATCTTCCAAATCGTGAACCACGGAATTCCCGTCGAGGCCGTGAAGGAGCTGCAGAGGGTCGGGAAGGAGTTCTTCGAGCTGCCACAAGGGGAGAAGGAGGCTTACGTGACGGGGCCGGGGAGCATCGAGGGGTACGGGACTAAACTGCAGAAGGATCTGGAAGGGAAGAAGGCTTGGGTCGACTACTTGTTTCAT…	MEFERVQAIASLSASLNTIPPEFIRSEHERPDTTTYRGPVPEIPVVDLSVADRTRLTRAIADASEEWGIFQIVNHGIPVEAVKELQRVGKEFFELPQGEKEAYVTGPGSIEGYGTKLQKDLEGKKAWVDYLFHFVWPESRINLKFWPEKPEAYRTANKEYAKHLLRIVDEMLSSLSLGLGLEEHTVKEAVGGDELEMLLKINYYPPCPRPDLALGVVAHTDMSVVTILVPNEVPGLQVFKDDRWFDVKYIPNALIVHIGDQVEILSNGKYKSVLHRTTVNKEKARMSWPVFCSPTDETVVGPLPQLVGDENPAKFKTKKYKDYCYCKLNKLPQ
		c51914.graph_c0	ATGATAATCCTCCAAAGTTTAAACCGTTTGCTTTCAAGGATTACAGTTACCGCAAGCTCAATAAACTTCCTCTGGATTGAGAAAAATCAATACGAGAAGAATAATTTGTGGTTGTGGAATAGGAAGTGGTTCGTTATTGAGTTGTTGTTTTCCCGCGGTTGTGTCTCTTGC	MIILQSLNRLLSRITVTASSINFLWIEKNQYEKNNLWLWNRKWFVIELLFSRGCVSC
		c64362.graph_c0	ATGGAAGAGATGATCGACCCAAGCTTTTTTACCTTCTGGATCTTTCTGAAGCTTTGTTCCGTATCCTTCAATGTCTTTCGAATCTTCCGGTTTAGCGACGGATTCTTTCTCCGACGAAGGAAGCTCGAAGAATTTTCTTCCGACGTCTTGCAAACGTCGTATCAGCTCCGTCGG	MEEMIDPSFFTFWIFLKLCSVSFNVFRIFRFSDGFFLRRRKLEEFSSDVLQTSYQLRR
	LuOMT	c52576.graph_c0	ATGTTGGCTCACAATCCCGGAGGCAAAGAACGAACCGAGAAAGAGTTTGAGGCATTAGCCAAAGCATCAGGCTTCAAGGGCATCAAAGTTGTCTGCGACGCTTTTGGTGTTAACCTTATTGAGTTACTCAAGAAGCTC	MLAHNPGGKERTEKEFEALAKASGFKGIKVVCDAFGVNLIELLKKL
	SOT	c27097.graph_c0	ATGGCAGAGGAGGAAGAAAAGGAAAAACAAATGGCCATCAGCGATCGCAAGTTCTACGATGAACTCATTGCAACACTCCCCCTTGAAGAAAGCTGGGGGCTTCGGCTCCGTCACTATAAAAACTTCTGGTATGCTGAGGCCTCCCTCCCTCAAATCATAACCATTCAACGCACTTTCGAAGCCCGTCCTTCCGACATCTTCCTCGTCACTCAACCGAAGTCCGGCATCACCTGGCTCAAAGCCCTCGCCTTT	MPPGCLMKHAPKITGKGDWLMLTRGAPILFPTRTSSSTWPTASLVYNAQIILRLPRVAKLELQS
		c37902.graph_c0	ATGGCCTCCGAAGAAGATCCCACCCGACAATACGACCAGCTCATCTCCACCCTCCCATCTTGCGAAGGTTGGGCCGGCCCTTTGCGGCACTACCATGGCTTTTGGTACCCAGAGTTCCATCTTCCAGGCGGGCTCTCATTCCACGATCGTTTCAAGCCTCGAGATGACGACGTATTTATAATCTCACAGCCAAAATCGGGCACCACTTGGCTTAAAGCCCTACTCTTCGCGACTGTTAATAGAAAAAATTGTGATCCCCTTGCGAACGATCATCCCTTGCTTCGCATGAGTCCCCACGAATGCATCCATTTGGCGGACCTAATATTTAGCGGTGGTCGGGATTCTGAATTGGACTATCCCGATCTGCCGAGGCTTTTTGTCTCGCACATGCCTATCCAG…	MASEEDPTRQYDQLISTLPSCEGWAGPLRHYHGFWYPEFHLPGGLSFHDRFKPRDDDVFIISQPKSGTTWLKALLFATVNRKNCDPLANDHPLLRMSPHECIHLADLIFSGGRDSELDYPDLPRLFVSHMPIQLLPESVLRSDCKFIYICREPKDNLVSAWHYHNNIRPEGKIPLPFYRAYELYCKGMSPFGPVWEHQLGYWKESLNRPEKVLFLKYEDMLEDPMENLNKIAGFVGYPFSEAEEVGVAEAIVEMCSFEKLSGLDVNRTGNHQVEEIVFKNSAYFRKGKVGDWKNHLTPEMARRLDEITVTKLHGSGLSFGTHGKS
		c33420.graph_c2	ATGATGCCGATTTTGGATGATGCCGTTCTAGGGTTTCCCAAAACGGTGGTTTTTCCCAAAACGATTTTGGATGTCGCTGATTTTTTGTGTTCGATGATGTCGATCGATTTTGTTTTTCTGATGCCGAGTAGAGAGTCAGAATTTTGCCGATCGATTTTTTACGTCGATGATGGCGAGGAGGGTTTCGTTGATTTTGCCTATCGATTTTTTACGTCGATGATTTGGGTTATGTTGATTTTCCAATCGATGATGATGTTTTTC	MMPILDDAVLGFPKTVVFPKTILDVADFLCSMMSIDFVFLMPSRESEFCRSIFYVDDGEEGFVDFAYRFFTSMIWVMLIFQSMMMFF
	F4ST	c37092.graph_c1	ATGGCAGAAGAAGAGGAGGAAATCGAGAGACAAATGACCAACAACCGAAGCAAGTTCTATGATGAACTCATTGCAACACTGCCGCTGGAAGAAAGATGGGGGAGGCCACTCCGATACTACCAAAACTTCTGGTATGCCGAAGCCAACCTCGCTCGAGTCATGGCTATGCAACACGCTTTTGAAGCCCGCCCTTCCGATATCTTCCTCGTCACTCAACCAAAGGCCGGCACAACCTGGCTCAAAGCCCTCGCCTTTGCCATCGTGAACCGTAAAATTCACGATCCATCGAGCAAAGATCACCCCCTCCTTATCTCAAGCCCACACGATTGCATCCCTTTCGCGTTCTCATACTACGACGAAGAGTCTTTACTTCCATCCAATAAGTTAAGCTCCCTTCCG…	MAEEEEEIERQMTNNRSKFYDELIATLPLEERWGRPLRYYQNFWYAEANLARVMAMQHAFEARPSDIFLVTQPKAGTTWLKALAFAIVNRKIHDPSSKDHPLLISSPHDCIPFAFSYYDEESLLPSNKLSSLPSPRLIAFHFPYSALPKSALEANCRIVYLSRDVKDNLVSLWHFLNKLRPSSIGAPTFSEAFELFSKGISPFGPIWDHYTEYLQASSRHPDKVMMLKYEEIIEDGASNVKRLAEFMGCPFGEEEEERGVVEEIVKLCSFENLSSLEVNRIGFVDVNSKNVGAKNSYFFREGKSNVWRNLMSIEMGQILDSIMEEKTKVLI
	GT4	c26553.graph_c0	ATGAGTTCGTCAAATGGCAATCATCACATAGTTGTCTTCCCATGGCTAGCTTTCGGCCACATGCTTCCTTACCTGGAGCTCTCCAAATCCTTGGCCCGCAGAGGTCACCTTATCTCCTTCGTCTCCACTCCGAGAAACATCAAAAGACTCCCAAAAATACCTCCACAAATCTCCCACCTCATAAATTTCATCCCTTTGGAGCTACCCACAGTCGACGGCCTACCCGAGACTGCGGAGGCCACTTCCGACCTCCCCTCTGAACGTGTAGAATATCTAAAGATGGCCTTCGACCAGCTCGATCAACCCTTCAAGAGATTCATTCAGGGAACCTCCCCTAAACCGTACTGGATAATTCAAGACTTTGCACCTTTCTGGATACAACCGATAGCAGCAGAAGCA…	MSSSNGNHHIVVFPWLAFGHMLPYLELSKSLARRGHLISFVSTPRNIKRLPKIPPQISHLINFIPLELPTVDGLPETAEATSDLPSERVEYLKMAFDQLDQPFKRFIQGTSPKPYWIIQDFAPFWIQPIAAEAGIPTIFLSIFIAGFVVFLGPISELGNGASRTTPEAYTVPPPWVPFRSNLRYRLHEARRVFNDSCKPNITGFSDLERYKITLEGCTAVAIRSCMEVESEWLKLLPLILCKPVLPVGLLPPPALDGKDESDIINWLDSRRPRSVVYLAFGSEATLSAELMHELADGLELAKLPFVWAFRNEVSDLPSGFEERTKEYGVVAKGWVPQMKILAHESIGGFLTHSGWSSVIESLQFGHPLVLLPIFGDQGINARVVMEKGIAVEIERDEED…
		c38621.graph_c0	ATGGCTGGTCATGATAGCCTTCACATAGTTGTGTTCCCATGGTTAGCCTTTGGCCACATTCTCCCTTTCCTTGAGCTCTCCAAATCATTAGCCAAAAGAGGTCACCACATATCATTCATTTCCACTCCACGAAACATACAAAGACTTCCCAAGATCCCTTCTGATGTATCCCACCTCATAAATCTCATCGCTTTCCCTCTTCAGAAAGTCGATGGGCTCCCCACGACCGCGGAGGCCACGTCCGATGTTACCCCAGAATGCGTCGAACTCCTCAAGATTGCTTTCGACGGCCTGGAAGAACCGTTCCGTAACTTCATCGAAGAACATGCTCCTGCGCAAGTAGACTGGATCATTCAAGACTTTGCACAGCACTGGATACCGCCTATCGCCACCAAGGGC…	MAGHDSLHIVVFPWLAFGHILPFLELSKSLAKRGHHISFISTPRNIQRLPKIPSDVSHLINLIAFPLQKVDGLPTTAEATSDVTPECVELLKIAFDGLEEPFRNFIEEHAPAQVDWIIQDFAQHWIPPIATKGKNVPCAYFSIYSCASLVFFYDSLGLGELAERTKPEELLVPPPWVPFHSNLAYRCISDARNMLDYAFKPNSSGTSDAHRLRSVIKFSNAIVTRSSIEFEPEWLQLLPQLYKKPVIPIGLLLPSPLPGGENEKWEKNKIIEWLEKQRSRSVVYIAFGSEAVLSDKLTRELAFGLELARVPFVWALRWPESMLPEGFDVRTKDFGVVARGWVPQLEILAHESIGGFMTHVGWSSIIEGLQFGQPLIMLPVFIDQGLVARLMEAKGIGIE…
		c38892.graph_c0	ATGGCTACTGCTAACGATCATGATCATCTTCACATAGTAGTATTCCCATGGTTAGCCTTTGGTCACATGCTTCCTTTCCTCGAGCTCTCAAAAGCGTTAGCAATCAGAGGCCACAAAATTTCCTACATCTCCACTCCAAGAAACATTCATCGACTCCCTAAACTCCCACCTCAGCTCTCCAATGTCATAAGTTTCATCCCCTTGGATCTACCAAAAGTCGAAGGCTTGCGCGAGGCCGCAGAGGCCACCATGGACCTCCCGCCCGACGAGGTCCCGTTCCTCAAGAAGGCTATGGACGGCCTCGAGCAACCCTTGGCGAAATTCATGGAGGAGACTTCTCCTAGACCAGACTGGGTAATCCAAGACTTTGCGCAGCACTGGATGTCGAAGCTCGGCATA…	MATANDHDHLHIVVFPWLAFGHMLPFLELSKALAIRGHKISYISTPRNIHRLPKLPPQLSNVISFIPLDLPKVEGLREAAEATMDLPPDEVPFLKKAMDGLEQPLAKFMEETSPRPDWVIQDFAQHWMSKLGIPCVFYIGFPAADMVFFGPPSASPRRSPEDFTVPPPWVPFKSKVAYRPHEVRELFQHAKLPCPSGITDSYRYQAVIGGCKAIAPRSCREMESEWLCLMEEVFKKPIIPVGLLPPSANERRVNLDENKAAEIMEWLDEQSSGSVVYVALGTEATMSIEMLHELALGLEAAKTPFVWALRRPFDVNKNVEMLPSGFEDRSKSFGMVVTGWVPQVEILAHRSVGGFFTHCGWSSIVEGLQAGRPLVLLPIVLDQGLNARLMGEKGIGIEV…
	UF3GT	c21851.graph_c0	ATGAGAGGTTGGGCCCCACAGGTCCAGATACTAAATCACGGGTCCGTCGGCGGGTTC	MRGWAPQVQILNHGSVGGF
Flavanone biosynthesis	ANR	c35393.graph_c1	ATGTTCGCCTGCCCCCTCACAGGGGATCCTCTATGTTACAGACAGCTAAAGTTTATGCAAGCATTGATCGGTTCAATTCCCGCTGTCCACATTGAAGATGTTTGCGATGCACACGTTTTCTGCATGGAGAAGTCGTCAATGTCCGGTAGATTTCTCTGTGCCAGTGCCTACCCAACAATTCAAGAATTCGTAGAATACTACGAGCAGAAGTGTCCTGCTGTGAGAGTGACTAAAGAGTTTGAAGGAACTGAGGGAGTGGTCAGGTGCGATTCTCAGAAGCTAGTTGAAGAAGGCTTTAAATATCGATACGGGTTGAAACAGGTTTTAGATGATAGCGTGGCGTGCATGAAAAGGTTGGAAGGACTTGGAGGACTCTCA	MFACPLTGDPLCYRQLKFMQALIGSIPAVHIEDVCDAHVFCMEKSSMSGRFLCASAYPTIQEFVEYYEQKCPAVRVTKEFEGTEGVVRCDSQKLVEEGFKYRYGLKQVLDDSVACMKRLEGLGGLS
	LAR	c28704.graph_c0	ATGTCTAAAGTTGATGGTAACCCAGACAAAGTTCTCATAATTGGCGCTACTGGTTGCATTGGAGAATTCATTGCTGAATCAAGCTTGGAGAATGGGAAGACTACTTACCTGCTCGTTCGCCCCGGATCGTCCGCCTCGCCATCGAAGGACGCCATCTTGAAGAAATTCACTAGCAAAGGAGCTATCATCATCGAGGGTGAAGCTACAGATAAAGATCTGGTAGAGAAGAAAATCAGGGAATACCAAATCGATGTAGTCATTTCGGCCATTGCTGGCCACGCCCTTCTTGAACAACTTTCACTTGTGGAAGCCATAAAAGCTGCAGGAAACGTCAAGAGGTTCTTGCCCTCGGAGTTTGGACACGACGTCGACAAGTCGAACCCGGAGGAACCTGCTCAA…	MSKVDGNPDKVLIIGATGCIGEFIAESSLENGKTTYLLVRPGSSASPSKDAILKKFTSKGAIIIEGEATDKDLVEKKIREYQIDVVISAIAGHALLEQLSLVEAIKAAGNVKRFLPSEFGHDVDKSNPEEPAQSFYNIKRKVRRATEDAGIPYTYICCNSIAGWPYFDNIHPCNVCPPLEQFQIYGDGNQEAYFVAGVDIGKFTIKACFDPRTINKHVHFRPACNKFSLNKMAALWESKIGRTLPRVTITEQDLLTMAKEYSFPSCVVAALTHDVFIQGCQVNFFIDGVKDLEIGSLYPDSLYKTLDECFNEYAEDLRIKESH
