# Supplementary material for: Structure of Pigment Metabolic Pathways and Their Contributions to White Tepal Color Formation of Chinese Narcissus tazetta var. chinensis cv Jinzhanyintai
Source: Int J Mol Sci. 2017 Sep 8;18(9):1923. doi: 10.3390/ijms18091923 (PMC5618572; doi:10.3390/ijms18091923)
Supplement: Supplementary file 1 [file ijms-18-01923-s001.zip › R-Table S8.xlsx]

## Sheet: STable 7
Table S7. List of unigenes of flavonoids metabolic pathway in tepal transcriptome of Chinese narcissus.
Pathway	Gene	Gene ID	Length (bp)	Sequence integrity	E-value	Reference annotation	Reference sequence id	T2 (RPKM)	T3 (RPKM)	T4 (RPKM)	T5 (RPKM)
Phenylpropanoid biosynthesis	PAL	c37401.graph_c1	1854	0.8607	0	Phenylalanine ammonia-lyase 1 OS=Prunus avium GN=PAL1 PE=2 SV=1	sp|O64963|PAL1_PRUAV	319.39	265.04	245.41	1069.35
		c23044.graph_c0	315	0.1462	5.02877e-33	Phenylalanine ammonia-lyase 1 OS=Prunus avium GN=PAL1 PE=2 SV=1	sp|O64963|PAL1_PRUAV	26.54	10.42	60.31	80.46
		c35872.graph_c1	1188	0.5625	0	Phenylalanine ammonia-lyase OS=Bromheadia finlaysoniana GN=PAL PE=2 SV=1	sp|Q42609|PALY_BROFI	40.07	28.24	122.25	152.76
		c37719.graph_c0	2124	0.9847	0	Phenylalanine ammonia-lyase 3 OS=Petroselinum crispum GN=PAL3 PE=2 SV=1	sp|P45729|PAL3_PETCR	18.45	3.03	153.02	1332.68
	C4H	c37762.graph_c0	1515	0.998	0	Trans-cinnamate 4-monooxygenase OS=Populus tremuloides GN=CYP73A13 PE=2 SV=1	sp|O24312|TCMO_POPTM	355.86	80.94	10.31	15.8
	4CL	c34579.graph_c0	1536	0.9259	0	4-coumarate--CoA ligase OS=Vanilla planifolia GN=4CL PE=3 SV=1	sp|O24540|4CL_VANPL	24.03	11.12	2.86	12.26
		c34423.graph_c2	1053	0.644	1.05164e-121	4-coumarate--CoA ligase-like 7 OS=Arabidopsis thaliana GN=4CLL7 PE=1 SV=1	sp|Q9M0X9|4CLL7_ARATH	30.85	31.49	50.19	94.49
		c32428.graph_c0	1437	0.8448	0	4-coumarate--CoA ligase-like 6 OS=Arabidopsis thaliana GN=4CLL6 PE=2 SV=2	sp|Q84P24|4CLL6_ARATH	0	0.16	10.83	153.96
		c23093.graph_c0	276	0.1655	7.48818e-51	4-coumarate--CoA ligase-like 9 OS=Oryza sativa subsp. japonica GN=4CLL9 PE=2 SV=2	sp|Q7XXL2|4CLL9_ORYSJ	1.18	0.27	1.55	0.92
		c38760.graph_c0	1407	0.7689	3.14322e-126	Putative 4-coumarate--CoA ligase-like 8 OS=Oryza sativa subsp. japonica GN=4CLL8 PE=2 SV=1	sp|Q8GVF9|4CLL8_ORYSJ	39.57	56.41	19.81	11.62
		c31676.graph_c2	705	0.4352	6.59949e-131	Probable 4-coumarate--CoA ligase 5 OS=Oryza sativa subsp. japonica GN=4CL5 PE=2 SV=1	sp|Q6ZAC1|4CL5_ORYSJ	0.94	0.21	0.45	1.01
		c33953.graph_c0	1635	0.968	0	4-coumarate--CoA ligase-like 9 OS=Arabidopsis thaliana GN=4CLL9 PE=1 SV=2	sp|Q84P23|4CLL9_ARATH	18.96	84.62	97.57	110.62
		c38303.graph_c0	1575	1	0	4-coumarate--CoA ligase-like 10 OS=Arabidopsis thaliana GN=4CLL10 PE=2 SV=1	sp|Q9SMT7|4CLLA_ARATH	51.21	143.17	225.71	160.79
		c38257.graph_c0	1695	0.9912	0	Probable 4-coumarate--CoA ligase 2 OS=Oryza sativa subsp. japonica GN=4CL2 PE=2 SV=2	sp|Q42982|4CL2_ORYSJ	133.24	92.62	81.94	104.76
		c21888.graph_c0	219	0.1344	8.62371e-30	4-coumarate--CoA ligase-like 1 OS=Arabidopsis thaliana GN=4CLL1 PE=2 SV=1	sp|Q9LQ12|4CLL1_ARATH	0	0	0	0.52
		c36335.graph_c0	1650	0.9946	0	4-coumarate--CoA ligase-like 4 OS=Oryza sativa subsp. japonica GN=4CLL4 PE=2 SV=1	sp|Q10S72|4CLL4_ORYSJ	27.2	52.33	59.46	75.27
		c22889.graph_c0	330	0.1989	6.37221e-30	4-coumarate--CoA ligase OS=Vanilla planifolia GN=4CL PE=3 SV=1	sp|O24540|4CL_VANPL	3.6	6.07	5.52	6.75
	C3H	c35438.graph_c0	1527	1	0	p-coumarate 3-hydroxylase OS=Narcissus tazetta PE=2 SV=1	sp|M9T0K9|M9T0K9_NARTA	73.65	68.72	100.58	182.61
	C3'H	c35438.graph_c0	1527	1	0	p-coumaroyl-shikimate 3'-hydroxylase OS=Trifolium pratense GN=CYP98A44v2 PE=2 SV=1	sp|D0EYH3|D0EYH3_TRIPR	73.65	68.72	100.58	182.61
	COMT	c30844.graph_c0	1125	1	1.60111e-76	Caffeic acid 3-O-methyltransferase OS=Prunus dulcis GN=COMT1 PE=2 SV=1	sp|Q43609|COMT1_PRUDU	45.7	36.92	111.88	87.57
		c34620.graph_c0	1098	1	9.71514e-175	Caffeic acid 3-O-methyltransferase OS=Rosa chinensis GN=COMT1 PE=2 SV=1	sp|Q8GU25|COMT1_ROSCH	418.65	481.78	798	742.94
		c23510.graph_c1	1092	1	4.80131e-107	Caffeic acid 3-O-methyltransferase OS=Coffea canephora PE=2 SV=1	sp|Q8LL87|COMT1_COFCA	194.37	10.51	2.79	2.28
	F5H	c26398.graph_c0	1419	0.9329	2.00034e-126	Putative ferulate 5-hydroxylase OS=Phyllostachys praecox GN=F5H2 PE=2 SV=1	sp|C0KHL8|C0KHL8_9POAL	0	0	0	3
	CCR	c13600.graph_c1	843	0.8169	5.46477e-147	Cinnamoyl-CoA reductase 1 OS=Arabidopsis thaliana GN=CCR1 PE=1 SV=1	sp|Q9S9N9|CCR1_ARATH	0	4.94	99.67	71.96
		c26859.graph_c0	297	0.2878	3.61857e-31	Cinnamoyl-CoA reductase 1 OS=Arabidopsis thaliana GN=CCR1 PE=1 SV=1	sp|Q9S9N9|CCR1_ARATH	4.83	2.13	0.78	1.71
		c28502.graph_c0	972	0.9419	1.70807e-87	Cinnamoyl-CoA reductase 1 OS=Arabidopsis thaliana GN=CCR1 PE=1 SV=1	sp|Q9S9N9|CCR1_ARATH	73.36	79.75	70.53	74.01
		c44125.graph_c0	387	0.375	6.29598e-27	Cinnamoyl-CoA reductase 2 OS=Arabidopsis thaliana GN=CCR2 PE=1 SV=1	sp|Q9SAH9|CCR2_ARATH	0	1.66	0	0
		c30311.graph_c0	1050	1	4.4997e-159	Cinnamoyl-CoA reductase 1 OS=Arabidopsis thaliana GN=CCR1 PE=1 SV=1	sp|Q9S9N9|CCR1_ARATH	0.37	10.86	500.14	1102.38
		c32128.graph_c0	972	0.9419	3.0605e-92	Cinnamoyl-CoA reductase 1 OS=Arabidopsis thaliana GN=CCR1 PE=1 SV=1	sp|Q9S9N9|CCR1_ARATH	4.38	3.3	2.32	11.89
		c38925.graph_c1	2094	1	3.13729e-77	Cinnamoyl-CoA reductase 1 OS=Arabidopsis thaliana GN=CCR1 PE=1 SV=1	sp|Q9S9N9|CCR1_ARATH	146.22	114.13	93.57	87.65
		c34475.graph_c1	396	0.3837	2.87385e-98	Cinnamoyl-CoA reductase 1 OS=Arabidopsis thaliana GN=CCR1 PE=1 SV=1	sp|Q9S9N9|CCR1_ARATH	10.87	22.77	44.65	29.44
		c36807.graph_c1	360	0.3488	1.88124e-45	Cinnamoyl-CoA reductase 1 OS=Arabidopsis thaliana GN=CCR1 PE=1 SV=1	sp|Q9S9N9|CCR1_ARATH	7.47	10.77	8.78	3.42
		c30875.graph_c0	897	0.8692	3.94942e-37	Cinnamoyl-CoA reductase 2 OS=Arabidopsis thaliana GN=CCR2 PE=1 SV=1	sp|Q9SAH9|CCR2_ARATH	72.83	319.07	652.91	278
		c31437.graph_c0	525	0.5087	3.63704e-79	Cinnamoyl-CoA reductase 2 OS=Arabidopsis thaliana GN=CCR2 PE=1 SV=1	sp|Q9SAH9|CCR2_ARATH	119.77	35.1	21.93	10.32
		c33336.graph_c0	987	0.9694	6.50601e-68	Cinnamoyl-CoA reductase 1 OS=Arabidopsis thaliana GN=CCR1 PE=1 SV=1	sp|Q9S9N9|CCR1_ARATH	8.65	0.31	2.54	3.57
		c24301.graph_c1	216	0.2093	1.47902e-25	Cinnamoyl-CoA reductase 2 OS=Arabidopsis thaliana GN=CCR2 PE=1 SV=1	sp|Q9SAH9|CCR2_ARATH	0	0.8	0.87	0
		c34475.graph_c0
	CAD	c37045.graph_c0	1071	0.9917	0	Probable cinnamyl alcohol dehydrogenase 6 OS=Oryza sativa subsp. japonica GN=CAD6 PE=2 SV=2	sp|Q7XWU3|CADH6_ORYSJ	3.7	162.69	749.53	865.47
		c9037.graph_c0	333	0.3083	1.36077e-99	Probable cinnamyl alcohol dehydrogenase 9 OS=Arabidopsis thaliana GN=CAD9 PE=2 SV=2	sp|P42734|CADH9_ARATH	0.6	0	0	0
		c15831.graph_c0	120	0.1111	3.15337e-16	Cinnamyl alcohol dehydrogenase 8 OS=Arabidopsis thaliana GN=CAD8 PE=1 SV=1	sp|Q02972|CADH8_ARATH	1.05	0	1.02	1.11
		c27208.graph_c0	207	0.1917	3.49824e-49	Putative cinnamyl alcohol dehydrogenase 5 OS=Oryza sativa subsp. japonica GN=CAD5	sp|Q0J6T3|CADH5_ORYSJ	0	0	0.98	5.36
		c29266.graph_c0	207	0.1917	4.85219e-12	Probable cinnamyl alcohol dehydrogenase 8C OS=Oryza sativa subsp. japonica GN=CAD8C PE=2 SV=2	sp|Q6ERW7|CAD8C_ORYSJ	8	8.09	5.51	4.06
		c27921.graph_c0	1071	0.9917	0	Probable cinnamyl alcohol dehydrogenase OS=Zea mays GN=CAD PE=2 SV=1	sp|O24562|CADH_MAIZE	25.18	9.49	4.05	15.69
		c34897.graph_c3	348	0.3222	4.55757e-15	Putative cinnamyl alcohol dehydrogenase 5 OS=Oryza sativa subsp. japonica GN=CAD5 PE=3 SV=2	sp|Q0J6T3|CADH5_ORYSJ	2.41	6.83	24.5	26.85
		c19623.graph_c0	1068	0.9916	0	Probable cinnamyl alcohol dehydrogenase 6 OS=Oryza sativa subsp. japonica GN=CAD6 PE=2 SV=2	sp|Q7XWU3|CADH6_ORYSJ	18.95	4.07	0.73	0.2
		c23836.graph_c0	492	0.4556	2.33378e-77	Putative cinnamyl alcohol dehydrogenase 5 OS=Oryza sativa subsp. japonica GN=CAD5 PE=3 SV=2	sp|Q0J6T3|CADH5_ORYSJ	1.08	1.29	1.08	3.09
		c32593.graph_c0	1059	0.9806	0	Probable cinnamyl alcohol dehydrogenase 1 OS=Oryza sativa subsp. japonica GN=CAD1 PE=2 SV=1	sp|Q8H859|CADH1_ORYSJ	17.1	19.31	19.46	25.66
		c21584.graph_c0	363	0.3361	9.92987e-11	Probable cinnamyl alcohol dehydrogenase 9 OS=Arabidopsis thaliana GN=CAD9 PE=2 SV=2	sp|P42734|CADH9_ARATH	3.56	3.9	3.78	8.72
		c41339.graph_c0	93	0.0861	8.81132e-25	Probable cinnamyl alcohol dehydrogenase 9 OS=Arabidopsis thaliana GN=CAD9 PE=2 SV=2	sp|P42734|CADH9_ARATH	1.11	0	0	0
	HCT	c36798.graph_c0	921	0.7041	1.74988e-48	Shikimate O-hydroxycinnamoyltransferase OS=Nicotiana tabacum GN=HST PE=1 SV=1	sp|Q8GSM7|HST_TOBAC	19.67	21.02	13.15	17.63
		c37009.graph_c0	1146	0.8802	8.5848e-180	Shikimate O-hydroxycinnamoyltransferase OS=Arabidopsis thaliana GN=HST PE=2 SV=1	sp|Q9FI78|HST_ARATH	81.77	69.68	28.38	51.61
		c37574.graph_c2	1287	0.9839	2.05308e-96	Shikimate O-hydroxycinnamoyltransferase OS=Nicotiana tabacum GN=HST PE=1 SV=1	sp|Q8GSM7|HST_TOBAC	75.44	101.68	35.54	25.78
		c36589.graph_c0	1284	0.9817	6.57844e-123	Shikimate O-hydroxycinnamoyltransferase OS=Nicotiana tabacum GN=HST PE=1 SV=1	sp|Q8GSM7|HST_TOBAC	39.15	33.4	29.04	11.8
		c34482.graph_c0	1050	0.8065	3.04536e-23	Shikimate O-hydroxycinnamoyltransferase OS=Arabidopsis thaliana GN=HST PE=2 SV=1	sp|Q9FI78|HST_ARATH	0	0	4.73	90.93
		c22698.graph_c0	1308	1	0	Shikimate O-hydroxycinnamoyltransferase OS=Nicotiana tabacum GN=HST PE=1 SV=1	sp|Q8GSM7|HST_TOBAC	11.11	2.47	303.98	479.62
	CCoAMT	c30806.graph_c0	759	1	1.99399e-159	Caffeoyl-CoA O-methyltransferase OS=Populus tremuloides PE=2 SV=1	sp|Q43095|CAMT_POPTM	22	30.12	63.53	82.28
		c26515.graph_c0	717	1	1.42307e-82	Caffeoyl-CoA O-methyltransferase OS=Populus kitakamiensis PE=2 SV=1	sp|P93711|CAMT_POPKI	18.44	0	0.32	0
		c27229.graph_c1	543	0.7449	1.09767e-106	Caffeoyl-CoA O-methyltransferase OS=Solanum tuberosum GN=CCOAOMT PE=2 SV=1	sp|Q8H9B6|CAMT_SOLTU	28.23	3.41	13.26	24.85
Flavonoid biosynthesis	CHS	c9702.graph_c0	555	0.4672	2.98276e-133	Chalcone synthase OS=Arabidopsis thaliana GN=CHS PE=1 SV=1	sp|P13114|CHSY_ARATH	0	0.39	0	0.93
		c56123.graph_c0	111	0.0927	4.48848e-14	Chalcone synthase OS=Callistephus chinensis GN=CHS PE=2 SV=2	sp|P48385|CHSY_CALCH	1.57	0	0	0
		c30475.graph_c2	507	0.4333	1.9143e-111	Chalcone synthase A OS=Petunia hybrida GN=CHSA PE=2 SV=1	sp|P08894|CHSA_PETHY	0	1.59	0.86	0.95
		c36136.graph_c0	1140	0.9445	3.81722e-162	Chalcone synthase 2 OS=Ruta graveolens GN=CHS2 PE=2 SV=1	sp|Q9FSB8|CHS2_RUTGR	0	0	0	0.17
		c31612.graph_c0	1170	0.9898	0	Chalcone synthase 3 OS=Ruta graveolens GN=CHS3 PE=2 SV=1	sp|Q9FSB7|CHS3_RUTGR	2002.33	708.52	35.04	13.85
	CHI	c29518.graph_c0	744	1	7.16004e-107	Chalcone--flavonone isomerase OS=Allium cepa GN=CHI PE=2 SV=1	sp|Q6QHK0|CFI_ALLCE	473.71	263.3	200.14	148.2
		c27452.graph_c0	648	1	1.68196e-88	Probable chalcone--flavonone isomerase 3 OS=Arabidopsis thaliana GN=CHI3 PE=1 SV=1	sp|Q8VZW3|CFI3_ARATH	277.71	220.37	268.56	217.75
	F3H	c31072.graph_c0	1098	0.9892	0	Naringenin,2-oxoglutarate 3-dioxygenase (Fragment) OS=Petunia hybrida GN=AN3 PE=1 SV=1	sp|Q07353|FL3H_PETHY	1426.6	511.41	41.07	15.93
		c28316.graph_c0	1041	0.9481	1.53506e-70	Naringenin,2-oxoglutarate 3-dioxygenase OS=Dianthus caryophyllus GN=FHT PE=2 SV=1	sp|Q05964|FL3H_DIACA	0.5	5.28	19.37	293.68
		c30178.graph_c0	1059	0.9671	3.68273e-67	Naringenin,2-oxoglutarate 3-dioxygenase OS=Malus domestica PE=2 SV=1	sp|Q06942|FL3H_MALDO	0.28	0.5	1.73	6.63
	F3'H	c34619.graph_c0	1524	0.9902	0	Flavonoid 3&apos;-monooxygenase OS=Petunia hybrida GN=CYP75B2 PE=2 SV=1	sp|Q9SBQ9|F3PH_PETHY	630.37	58.79	2.45	5.58
		c37588.graph_c0	1512	1	1.93562e-132	Cytochrome P450 71A1 OS=Persea americana GN=CYP71A1 PE=1 SV=2	sp|P24465|C71A1_PERAE	178.35	44.37	49.93	109.82
	DFR	c35393.graph_c2	1026	0.937	8.29497e-47	Dihydroflavonol-4-reductase OS=Callistephus chinensis GN=F PE=2 SV=1	sp|P51103|DFRA_CALCH	189.07	427.42	266.91	124.33
		c26216.graph_c0	1011	0.98	4.87808e-42	Putative dihydroflavonol-4-reductase OS=Synechocystis sp. (strain PCC 6803 / Kazusa) GN=dfrA PE=3 SV=1	sp|P73212|DFRA_SYNY3	15.2	18.43	18.83	24.36
	ANS	c34412.graph_c1	1038	0.8557	9.57026e-163	Leucoanthocyanidin dioxygenase OS=Morus notabilis GN=L484_007681 PE=3 SV=1	sp|W9RNE7|W9RNE7_9ROSA	0.2	3.76	1.54	1.71
Anthocyanin modification	UFGT	c49264.graph_c0	297	0.343	3.21826e-25	Anthocyanidin 3-O-glucosyltransferase 7 (Fragment) OS=Manihot esculenta GN=GT7 PE=2 SV=1	sp|Q40289|UFOG7_MANES	1.26	0	0	0
		c14774.graph_c0	276	0.1945	2.69589e-13	UDP-glycosyltransferase 78D4 OS=Arabidopsis thaliana GN=UGT78D4 PE=2 SV=2	sp|Q9LFJ9|U78D4_ARATH	0.76	0.68	0	0
		c32147.graph_c0	1206	0.8861	6.9953e-108	Anthocyanidin 3-O-glucosyltransferase 2 OS=Vitis vinifera GN=UFGT PE=1 SV=2	sp|P51094|UFOG_VITVI	145.53	131.54	80.5	70.05
		c43043.graph_c0	231	0.1697	6.24266e-21	UDP-glycosyltransferase 78D4 OS=Arabidopsis thaliana GN=UGT78D4 PE=2 SV=2	sp|Q9LFJ9 |U78D4_ARATH	0	1.34	0	0
		c36923.graph_c0	1416	0.9958	0	Anthocyanidin 3-O-glucosyltransferase OS=Petunia hybrida GN=RT PE=2 SV=1	sp|Q43716|UFOG_PETHY	237.99	120.33	16.32	23.93
		c33867.graph_c0	1374	0.9385	2.14479e-60	Anthocyanidin 3-O-glucosyltransferase 5 OS=Manihot esculenta GN=GT5 PE=1 SV=1	sp|Q40287|UFOG5_MANES	3.79	11.2	3.89	4.57
		c38209.graph_c1	1401	0.957	2.16549e-143	UDP-glucose flavonoid 3-O-glucosyltransferase 7 OS=Fragaria ananassa GN=GT7 PE=1 SV=1	sp|Q2V6J9|UFOG7_FRAAN	5.71	36.33	34.51	22.55
		c14709.graph_c0	657	0.4488	3.79596e-38	UDP-glucose flavonoid 3-O-glucosyltransferase 7 OS=Fragaria ananassa GN=GT7 PE=1 SV=1	sp|Q2V6J9|UFOG7_FRAAN	0.69	1.86	0	0
		c27678.graph_c1	1119	0.7643	8.49293e-50	UDP-glucose flavonoid 3-O-glucosyltransferase 7 OS=Fragaria ananassa GN=GT7 PE=1 SV=1	sp|Q2V6J9|UFOG7_FRAAN	1.92	7.3	3.14	2.69
		c36255.graph_c0	1380	0.9426	1.03077e-113	UDP-glucose flavonoid 3-O-glucosyltransferase 7 OS=Fragaria ananassa GN=GT7 PE=1 SV=1	sp|Q2V6J9|UFOG7_FRAAN	3.46	1.43	1.53	1.99
	3RT	c53224.graph_c0	108	0.0779	1.80675e-39	UDP-glycosyltransferase 79B2 OS=Arabidopsis thaliana GN=UGT79B2 PE=2 SV=1	sp|Q9T080|U79B2_ARATH	0	0	3.51	0
	5GT	c37200.graph_c1	1125	0.8082	1.35962e-87	Cyanidin 3-O-rutinoside 5-O-glucosyltransferase OS=Iris hollandica GN=5GT PE=1 SV=1	sp|Q767C8|IH5GT_IRIHO	11.21	18.87	65.09	351.51
		c29151.graph_c1	414	0.2974	1.76125e-37	Cyanidin 3-O-rutinoside 5-O-glucosyltransferase OS=Iris hollandica GN=5GT PE=1 SV=1	sp|Q767C8|IH5GT_IRIHO	2.11	1.51	2.45	0.45
		c31056.graph_c0	1389	0.9978	4.12005e-119	Cyanidin 3-O-rutinoside 5-O-glucosyltransferase OS=Iris hollandica GN=5GT PE=1 SV=1	sp|Q767C8|IH5GT_IRIHO	2.69	1.69	0.39	8.2
	AA7GT	c15884.graph_c0	942	0.6206	9.62906e-103	Cyanidin 3-O-glucoside 7-O-glucosyltransferase (acyl-glucose) OS=Delphinium grandiflorum GN=AA7GT PE=1 SV=1	sp|E3W9M3|AA7GT_DELGR	0.2	0	0.19	0.21
	5MaT1	c32884.graph_c0	1092	0.7862	4.35498e-42	Malonyl-coenzyme:anthocyanin 5-O-glucoside-6&apos;&apos;&apos;-O-malonyltransferase OS=Salvia splendens GN=5MAT1 PE=1 SV=1	sp|Q8W1W9|5MAT1_SALSN	138.55	8.8	1.52	0.96
		c43691.graph_c0	291	0.2095	5.74454e-09	Malonyl-coenzyme:anthocyanin 5-O-glucoside-6&apos;&apos;&apos;-O-malonyltransferase OS=Salvia splendens GN=5MAT1 PE=1 SV=1	sp|Q8W1W9|5MAT1_SALSN	1.01	0.9	0	0.54
	UGT75C1	c24886.graph_c0	246	0.1779	1.86457e-30	Anthocyanidin 3-O-glucoside 5-O-glucosyltransferase 1 OS=Perilla frutescens GN=PF3R4 PE=1 SV=1	sp|Q9ZR27|5GT1_PERFR	4.53	1.1	2.99	12.71
		c37200.graph_c0	246	0.1779	3.43194e-26	Anthocyanidin 3-O-glucoside 5-O-glucosyltransferase 1 OS=Perilla frutescens GN=PF3R4 PE=1 SV=1	sp|Q9ZR27|5GT1_PERFR	2.75	6.68	24.71	184.83
	GT1	c35993.graph_c0	1404	0.9873	1.30019e-135	Anthocyanidin 5,3-O-glucosyltransferase OS=Rosa hybrid cultivar GN=RhGT1 PE=2 SV=1	sp|Q4R1I9|ANGLT_ROSHC	22.77	91.83	101.42	58.65
		c28109.graph_c0	405	0.2848	1.11817e-48	Anthocyanidin 5,3-O-glucosyltransferase OS=Rosa hybrid cultivar GN=RhGT1 PE=2 SV=1	sp|Q4R1I9|ANGLT_ROSHC	4.64	1.04	0.75	1.24
		c34341.graph_c1	1407	0.9895	2.28833e-128	Anthocyanidin 5,3-O-glucosyltransferase OS=Rosa hybrid cultivar GN=RhGT1 PE=2 SV=1	sp|Q4R1I9|ANGLT_ROSHC	35.34	50.64	47.73	31.37
		c38781.graph_c0	1458	1	2.37171e-135	UDP-glycosyltransferase 88A1 OS=Arabidopsis thaliana GN=UGT88A1 PE=2 SV=1	sp|Q9LK73|U88A1_ARATH	12.8	930.47	1631.16	1200.07
	3'GT	c21866.graph_c0	507	0.365	3.29539e-48	Anthocyanin 3&apos;-O-beta-glucosyltransferase OS=Gentiana triflora PE=1 SV=1	sp|Q8H0F2|ANGT_GENTR	0.37	0.33	0.36	1.19
		c21851.graph_c2	345	0.2484	1.21217e-22	Anthocyanin 3&apos;-O-beta-glucosyltransferase OS=Gentiana triflora PE=1 SV=1	sp|Q8H0F2|ANGT_GENTR	0.75	0	0	0.79
		c33256.graph_c0	1398	1	4.92574e-131	Anthocyanin 3&apos;-O-beta-glucosyltransferase OS=Gentiana triflora PE=1 SV=1	sp|Q8H0F2|ANGT_GENTR	0.4	0.62	0.41	0.3
		c21428.graph_c0	645	0.4644	7.47415e-73	Anthocyanin 3&apos;-O-beta-glucosyltransferase OS=Gentiana triflora PE=1 SV=1	sp|Q8H0F2|ANGT_GENTR	0.69	0.31	0.66	0.37
		c33042.graph_c0	1431	1	4.99947e-104	Anthocyanin 3&apos;-O-beta-glucosyltransferase OS=Gentiana triflora PE=1 SV=1	sp|Q8H0F2|ANGT_GENTR	80.83	120.26	13.57	0.26
Flavone and flavonol biosynthesis	FLS	c36592.graph_c0	1083	1	4.71826e-55	Flavonol synthase/flavanone 3-hydroxylase OS=Eustoma exaltatum subsp. russellianum GN=FLS PE=2 SV=1	sp|Q9M547|FLS_EUSER	3.11	3.78	11.56	36.84
		c24153.graph_c0	999	0.9911	4.92788e-174	Flavonol synthase/flavanone 3-hydroxylase OS=Citrus unshiu GN=FLS PE=1 SV=1	sp|Q9ZWQ9|FLS_CITUN	1911.18	773.37	431.16	209.61
		c51914.graph_c0	171	0.1691	8.2599e-70	Flavonol synthase/flavanone 3-hydroxylase OS=Arabidopsis thaliana GN=FLS1 PE=1 SV=1	sp|Q96330|FLS1_ARATH	1.32	0	0.64	0
		c64362.graph_c0	174	0.1721	8.66633e-58	Flavonol synthase/flavanone 3-hydroxylase OS=Arabidopsis thaliana GN=FLS1 PE=1 SV=1	sp|Q96330|FLS1_ARATH	0	1.16	0	1.4
	LuOMT	c52576.graph_c0	138	0.1264	3.40789e-39	Flavone 3&apos;-O-methyltransferase 1 OS=Arabidopsis thaliana GN=OMT1 PE=1 SV=1	sp|Q9FK25|OMT1_ARATH	1.23	0	0	0
	SOT	c27097.graph_c0	252	0.2772	2.77184e-12	Cytosolic sulfotransferase 12 OS=Arabidopsis thaliana GN=SOT12 PE=1 SV=2	sp|P52839|SOT12_ARATH	0	2.24	1.63	0
		c37902.graph_c0	975	0.9027	4.19451e-84	Cytosolic sulfotransferase 15 OS=Arabidopsis thaliana GN=SOT15 PE=1 SV=1	sp|Q8L5A7|SOT15_ARATH	78.25	26.41	55.42	27.24
		c33420.graph_c2	261	0.2507	3.51375e-10	Cytosolic sulfotransferase 17 OS=Arabidopsis thaliana GN=SOT17 PE=1 SV=1	sp|Q9FZ80|SOT17_ARATH	7.83	15.36	17.66	11.76
	F4ST	c37092.graph_c1	993	1	8.3229e-79	Flavonol 4&apos;-sulfotransferase OS=Flaveria chlorifolia PE=1 SV=1	sp|P52837|F4ST_FLACH	119.52	186.97	304.57	354.91
	GT4	c26553.graph_c0	1362	0.9478	2.18568e-147	Putative UDP-rhamnose:rhamnosyltransferase 1 OS=Fragaria ananassa GN=GT4 PE=2 SV=1	sp|Q66PF2|URT1_FRAAN	0.57	1.67	4.01	1.54
		c38621.graph_c0	1428	0.9937	3.78536e-142	Putative UDP-rhamnose:rhamnosyltransferase 1 OS=Fragaria ananassa GN=GT4 PE=2 SV=1	sp|Q66PF2|URT1_FRAAN	64.4	19.4	11.89	9.19
		c38892.graph_c0	1395	0.9908	6.59409e-153	Putative UDP-rhamnose:rhamnosyltransferase 1 OS=Fragaria ananassa GN=GT4 PE=2 SV=1	sp|Q66PF2|URT1_FRAAN	0	0.44	16.27	32.26
	UF3GT	c21851.graph_c0	57	3.93%%	1.24697e-4	UDP-glucose:flavonoid-O-glucosyltransferase (Fragment) OS=Daucus carota subsp. sativus PE=3 SV=1	sp|M4TIE8|M4TIE8_DAUCA	0	1.01	0	0
Flavanone biosynthesis	ANR	c35393.graph_c1	378	0.3673	4.82272e-17	Anthocyanidin reductase OS=Arabidopsis thaliana GN=BAN PE=1 SV=2	sp|Q9SEV0|BAN_ARATH	105.56	161.01	87.61	13.25
	LAR	c28704.graph_c0	969	0.8433	4.41127e-124	Leucoanthocyanidin reductase OS=Desmodium uncinatum GN=LAR PE=1 SV=1	sp|Q84V83|LAR_DESUN	0	0.16	0.17	1.74
