# Supplementary material for: Structure of Pigment Metabolic Pathways and Their Contributions to White Tepal Color Formation of Chinese Narcissus tazetta var. chinensis cv Jinzhanyintai
Source: Int J Mol Sci. 2017 Sep 8;18(9):1923. doi: 10.3390/ijms18091923 (PMC5618572; doi:10.3390/ijms18091923)
Supplement: Supplementary file 1 [file ijms-18-01923-s001.zip › R-Table S11.xlsx]

## Sheet: STable 18
Table S18. CDS and protein sequences of carotenoids metabolic pathway associated unigenes in tepal transcriptome of Chinese narcissus.
Pathway	Gene	Gene ID	CDS sequence	Protein sequence
MEP pathway	DXS	c22356.graph_c0	ATGGCAGTTAATAGGTCTCTCCTCTCAACTCAAGCAGCAACTTCTTCAATTCTAAGGATTCCGATTTCAAGCGTTACATGTAGTGGGAAGTTTCATGTGAGAGCCAGTGGGTCAGAAGCAGAGAGAAAAATGGCTGTGAAGAAAGAGAAGAATAGTTTGATGATTAATTTTTCAGAACAGAAACCAGCTACACCTTTATTGGACACAATCAATTACCCCGTGCACATGAAGAATCTCTCAACT	MAVNRSLLSTQAATSSILRIPISSVTCSGKFHVRASGSEAERKMAVKKEKNSLMINFSEQKPATPLLDTINYPVHMKNLST
		c33545.graph_c0	ATGGGTTCTAGTATTGCACAGTGTCCTTTTGCAAGCAATGGCCTATTACACGATGAATCTAAGATCCAACTTTCCAAATACAAATTCTTCAGAGTTCCTCGTTGCTTGAGAAGGGAAACTTCAAAATCCATTTTGTACCCAACTTCCACAGATGCCTATCATCAACACAAGGGTTCCTTTAGGCAAGTAACTGCTCTTCCTGATGATAGCAATTTTTTCTGGGAGAGGTCATCAACACCCATTCTGGACATGGTTGATACGCCAATTCATTTGAAGAATCTATCTATGAAGGACCTTAAACAGTTAGCTGATGAAATTCGTTCCGAGATATCTTTCTTGACGTCGAAGACAGACTTTCCTTTCAAAGCTAGTCTTACAGCGGTGGAACTGACAATTGCC…	MGSSIAQCPFASNGLLHDESKIQLSKYKFFRVPRCLRRETSKSILYPTSTDAYHQHKGSFRQVTALPDDSNFFWERSSTPILDMVDTPIHLKNLSMKDLKQLADEIRSEISFLTSKTDFPFKASLTAVELTIAIHYVFHAPADKILWDVGEQTYAHKLLTGRRFLMRSLKQKNGVCGFTSRFESEYDAFASGHGCNSVSAGLGMAVAGDIKGKKDRIVTVISNWTTMAGQVYEAMSNAGYLDSNMVVILNDSRHSLHPKLEEGPKMTVNAMSSTLSKLQSSKSFRKLREAAKGVTKRIGKGMHELAAKIDQYARGMIGPLGATLFEELGLYYIGPVDGHSIDDLICVLNEVASLDSIGPVLIHVITEEATGSDSSLKRKITFEQKGTLAAGSFTSYSKF…
		c27779.graph_c0	ATGATAATGTACATGCCTCAACCAGGATATATGATCTATTATGAGCCTTCAAACACCCGTAACAGCTTGTCAACCGTATATGATAAGAGTAGATATTTAATTGACTTAGAAGGCGGCCCTTCTATCCGTGTAGCATATAGCATTGAATCAGCTTTTGAATTTCTTCAC	MIMYMPQPGYMIYYEPSNTRNSLSTVYDKSRYLIDLEGGPSIRVAYSIESAFEFLH
		c39384.graph_c0	ATGGCGGTTAATGGGTCTCTCTTTTCATCTCAAGCAGCAAATTTTACACTCCCGAGGACTCCATTTTCAAGCAGCGCGTGTAGAGGCCAGTTTCATGTAAACGCTAGTGGGTCAGAAGGAGAGAGAAAACTGTCTGTGAAGAAAGAGAAGAATAGTAAGAAGATTGATTTTTCAGGAGAGAAGCCAGTTGTACCTTTGTTGGACACAATAAATTACCCTGTGCACATGAAGAATCTCTCAACTCAGGATCTGGAGCAATTGGCATCAGAGTTGAGATTAGACATAGTGCATTCCGTGTCGAAGACGGGGGGACATTTGAGTGCTAGTTTAGGAGTCGTTGATTTAACCGTGGCTCTTCACCACGTATTCAACACCCCCGATGATAAGATCATATGGGAT…	MAVNGSLFSSQAANFTLPRTPFSSSACRGQFHVNASGSEGERKLSVKKEKNSKKIDFSGEKPVVPLLDTINYPVHMKNLSTQDLEQLASELRLDIVHSVSKTGGHLSASLGVVDLTVALHHVFNTPDDKIIWDVGHQAYAHKILTGRRSRMHTLRQTSGLAGFPKRDESVHDAFGAGHSSTSISAGLGMAVARDLLGKGNHVISVIGDGAMTAGQAYEAMNNAGYLDSNLIVVLNDNKQVSLPTATLDGPATPVGALSGALAKLQASTKFRQLREAAKSITKQIGGQAHEVAAKVDEYARGMISASGACLFEELGLYYIGPVDGHNVEDLVAIFKKVKAMPSRGPVLIHIVTEKGKGYPPAEAAADKMHGVVKFDPKTGKQFKTKFPTLSYTQYFAESL…
		c32761.graph_c0	ATGGCTCTATCTACATGCTCACTGCCTTGCCACTTCGTTAGAAATGTAGCTTCAGATCCATTAAAACCCAGTTGTCTTCCTGCACAGCAACTTCAGCTTGGACTTCTCAAGGCCAGGAAAAGGCTATGTCCTAGTGCTTCACTTTCAGAGTCTGGAGAGTACTATGCACACAGGATACCAACTCCTCTCTTGGATACCGTCAACTATCCAATCCACATGAAAAATCTCTCAGTAAATGAACTCAAGCAACTAGCTGACGAGCTTCGTTCAGATGTCATCTTCCATGTATCAAAAACTGGAGGTCACCTCGGCTCGAGTCTTGGCGTTGTCGAGCTAACTGTTGCACTTCACTATGTCTTCAACACTCCTCAAGATAAGATACTATGGGATGTTGGCCAC…	MALSTCSLPCHFVRNVASDPLKPSCLPAQQLQLGLLKARKRLCPSASLSESGEYYAHRIPTPLLDTVNYPIHMKNLSVNELKQLADELRSDVIFHVSKTGGHLGSSLGVVELTVALHYVFNTPQDKILWDVGHQSYPHKILTGRRDKMPTMRQTNGL
	DXR	c33913.graph_c0	ATGGCGTTGAAGCTTCCACTTCCAGTAGAATTTGGGGGCGTTTCCTTCCTGGATTCGAGCAGGGGATCATTCCATCCCCTTAAAGTTGGGTTTCCTTTAAAAAGGAAGGAGAGAGGTACAAGTTTGAGAAGGGCATGTTGCTCAATGCAGCAGGCTCCTCCACCAGCATGGCCAGGCCGGGCTGTTGTTGAAGAAGGGCGCAAGTCTTGGGATGGCCCCAAGCCTATCTCTATTGTTGGATCAACTGGTTCAATTGGAACTCAGACACTGGACATAGTGGCTGAGAATCCAGATAAGTTCAGAGTTGTTGCTCTTGCAGCAGGGTCTAATGTGACCCTCTTGGCCGACCAGGTCAAAAGATTCAATCCTCAATTGGTTGCGGTTAGAAATGAGGCATTG…	MALKLPLPVEFGGVSFLDSSRGSFHPLKVGFPLKRKERGTSLRRACCSMQQAPPPAWPGRAVVEEGRKSWDGPKPISIVGSTGSIGTQTLDIVAENPDKFRVVALAAGSNVTLLADQVKRFNPQLVAVRNEALVDELKEALSDVQHKPEIIPGEQGVIEVARHPDAVSVVTGIVGCAGLKPTVAAIEAGKDIALANKETLIAGGPFVLPLAQKHKVKILPADSEHSAIFQCIQGLPEGALRRIILTASGGAFRDWPVEKLKEVKVADALKHPNWNMGRKITVDSATLFNKGLEVIEAHYLFGADYDNVEIVIHPQSIIHSMVETQDSSVLAQLGWPDMRLPILYTMSWPERIYCSEITWPRLDLCKLGSLTFKAPDNVKYPSMDLAYAAGRAGGTMTGV…
	MCT	c25490.graph_c0	ATGTTGCTTCGATCGAATCTTACTCTCTCTCATCATCATCTACCCAGCCTCTTCAATCCTCCTCATCGAATTAAAGGTTCAAAAGTTATTCCGAAGAGGAATTGGGTCGGTTGTGCTGCGAAATTTGATGGAGATAAGAGTGATGTTGTGGTAAAAGAGAGGAGCGTTTCCGTGCTTCTTTTGGCTGGAGGGAAAGGGAAACGAATGGGGGTAAGTATGCCAAAGCAGTATCTCCCATTATTAGGGCAGCCAATTGCCTTATACAGTTTCTATACATTCTGTGAAATGAACGAAGTGAAGGAAATGGTTGTAGTATGTGATCCATCCTACAAGAATGTATTTGAAGATGCTAGTGATGAGATAGAGATAGATCTTAAATTCGCACTTCCTGGAAAGGAG…	MLLRSNLTLSHHHLPSLFNPPHRIKGSKVIPKRNWVGCAAKFDGDKSDVVVKERSVSVLLLAGGKGKRMGVSMPKQYLPLLGQPIALYSFYTFCEMNEVKEMVVVCDPSYKNVFEDASDEIEIDLKFALPGKERQDSVFNGLQEIDGSSELVCVHDSARPLISSGDIEKVMKDGWLHGAAVLGVPVKATIKEANNQSFVVKTLDRRTLWEMQTPQVIRPELLRKGFQLVKRNRLEVTDDVSIVEHLKHPVYITEGSYTNIKVTTPDDLLLAERILNMEAVVPA
	CMK	c32121.graph_c0	ATGCCTTCAATTTCTTCACATCACATTTTTACTTCTTCGATGGCTGCTGGTTCTTACCAACTCTCTTGCAATCTCAATCCTCGTTCTTCTTGTGGTAGAAATCCCATCAAATTCTCCTCAAAAGGATCTTTTATTTCGTTTTCCAAACATGGGTCATCATCTTTTCATCCAAAGACCCAATTTAAGAAGAACCCAATTCATAGAATTGTGGCTTCTGCGTCAGAATCTGGCAAAAGACAGTTAGAGATTGTGTATAACCCAGAGGAAAGGATAAATAGATTGGCAGATGAAGTGGATAAGAACACTAGCCTTTCTAGGCTCTCTCTTTTCTCACCTTGTAAGGTTAATGTTTTCTTGAGGATTACTGGGAAGAGGGAAGATGGGTTCCATGATTTAGCA…	MPSISSHHIFTSSMAAGSYQLSCNLNPRSSCGRNPIKFSSKGSFISFSKHGSSSFHPKTQFKKNPIHRIVASASESGKRQLEIVYNPEERINRLADEVDKNTSLSRLSLFSPCKVNVFLRITGKREDGFHDLASLFHVISLGDTIKFSLSPTKTRDRLSTSVPGIPLDDSNLIIKALNLYRKKTGTDNYFWIHLDKKVPTGAGLGGGSSNAATALWAANQFSGCLATEQELQAWSSEIGSDIPFFFSHGAAYCTGRGEVVQDLPSPIHLDLPMVLIKPPEACSTAEVYKRFRLAQTSSVDPLSLLQKLNNGISQDVCINDLEPPAFEVLPSLKKLKQRVLAANRGEYNAVFMSGSGSTIVAVGSPDPPQFIYDDEDYKDVFVSDASFLTRQENQWYIHP…
	MDS	c22809.graph_c0	ATGGCATCTTCATCTCTCTCCTTTCTCTCTCCTCCTCACTTGCTCTTTCTTAAAACCAGAACCCTAACAACTCCTGCTCAATTTCTCTCTCCAGCCTCCTCGACCCCTCAATCTCACCGTTCGATTTCCAACCTTCGCCCAATCTCAGCCGTCCAATTGGAGGCCCAAATTGCGAGAGCCCCCTCGGAGAAATCTCCTCCTCCATCTCTCCCCTTCAGGATCGGCCATGGCTTCGACCTCCACCGCCTCGAACCGGGACTCCCTCTCATCATAGGCGGTGTCGACATCCCCCACGATCGCGGCTGCGAAGCCCATTCTGATGGGGATGTTTTGCTTCATTGTGTGGTGGATGCGATATTGGGGGCACTGGGGCTTCCTGATATTGGGCAGATATTTCCA…	MASSSLSFLSPPHLLFLKTRTLTTPAQFLSPASSTPQSHRSISNLRPISAVQLEAQIARAPSEKSPPPSLPFRIGHGFDLHRLEPGLPLIIGGVDIPHDRGCEAHSDGDVLLHCVVDAILGALGLPDIGQIFPDSDPKWKGAASCVFMREAVRLMHEAGYELGNLDATLILQRPKLSPHKEAIRANLCDLLGADPSVVNLKAKTHEKVDSLGENRSIAAHTVVLLMRK
	HDS	c58793.graph_c0	ATGTTCTTTGATCAGACCGATCAGAGCATCTGTTGCCTCCGTCATAGCTATCCCACGCTTCACCACCGTCTTTCCGACATAAAGGTCGATTTTTCCGGGAGGTCTCCGTTT	MFFDQTDQSICCLRHSYPTLHHRLSDIKVDFSGRSPF
		c35510.graph_c0	ATGGCCTCGGGATCGATTCCGGCATCTTTTCCTTCTCTTAGGAGTAGGGATTTGGGTTTAAGTTTTGCGAAGAACGTCGATTTCACAAAAGTTGCTTATGTTTCGAATTCTCAGAGAAGGAAATTTCCAAAAGTTAAGGTTTTCTCGGTGACCATGAATTCTACTTCCGGGTCTGATACTGTTGAGTTACAGCCTGCTTCGGAAGGAAGCCCCCTCTTAGTGCCAAAGCAGAAGTATTGTGAATCAGTGTACAAGACTGTTAGGAGAAAAACCCGAACTGTAATGGTTGGAAACGTGGCTCTTGGAAGTGGGCATCCTATTAAAATTCAGACGATGACTACCTCGGACACCAAAGACGTGGCTAAAACTGTCGAGGAGGTTATGAGAATAGCAGACAAG…	MASGSIPASFPSLRSRDLGLSFAKNVDFTKVAYVSNSQRRKFPKVKVFSVTMNSTSGSDTVELQPASEGSPLLVPKQKYCESVYKTVRRKTRTVMVGNVALGSGHPIKIQTMTTSDTKDVAKTVEEVMRIADKGADLVRITVQGKKEADACFEIKNTLVQKNYNIPLVADIHFAPPVALRVAECFDKIRVNPGNFADRRAQFETLEYTDDDYQKELEQIEQVFSPLVEKCKKYGRAMRIGTNHGSLSDRIMSYYGDSPRGMVESAFEFARICRKLDFHNFVFSMKASNPVVMVQAYRLLVAEMYVQGWDYPLHLGVTEAGEGEDGRMKSAIGIGTLLQDGLGDTIRVSLTEPPEEEIDPCRKLANLGMQAANLQKGVVPFEEKHRRYFDFQRRSGQLPV…
	HDR	c32513.graph_c0	ATGGCGATGGCAGTTGCAGCCTCTAATCTTCTAATTCCATCTAGGGTTTGGAGATCACGATCCTGCGCCGCCGGAAAATCGCCGATCTCCGTCAGATGCGTCGGAGGAGATAGCGGCTCTGGAGGCGGGGTGACGGCGTTGGAGGCGGACTTCGACAAGAAGGCGTTCCGTCACAACCTGACGAGGGGCGATAACTACAATCGCAAGGGTTTCGGCCACAAGAAGGAGACCATGGAGCTCATGAACCAAGAATACACAAGCGATGTGATAAGGACTTTGAAGGAGAATGGGAATGAATACACATGGGGCGACGTAACGGTGAAGCTAGCAGAGGCCTATGGGTTTTGTTGGGGTGTCGAAAGAGCCGTGCAGATTGCTTACGAGGCGAGAAAGCAGTTC…	MAMAVAASNLLIPSRVWRSRSCAAGKSPISVRCVGGDSGSGGGVTALEADFDKKAFRHNLTRGDNYNRKGFGHKKETMELMNQEYTSDVIRTLKENGNEYTWGDVTVKLAEAYGFCWGVERAVQIAYEARKQFPEEKIWITNEIIHNPTVNQRLEEMEVQNLPIEEGKKQFDVVDKGDVVILPAFGAAVDEMFTLSQKNVQIVDTTCPWVSKVWNTVEKHKKGDYTSIIHGKYSHEESIATASFAAKYVIVKNISEATYVCDYILGGQLDGSSSTKEAFLEKFKFAVSPGFDPDIDLIKTGIANQTTMLKGETEEIGKLVEKTMMRKYGVENINEHFISFNTICDATQERQDAMYKLVEEKVDLILVVGGWNSSNTSHLQEIAELRGIPSYWIDSEKRI…
	IPPI	c29614.graph_c0	ATGTCGGTGTTCTGTGGAGTTCAGATTCATACCCTATTATCCTTCCCGATTAGAATTGTAAATCCCAAAATTTTCCCCCAATTTCGATCCAGACCCATAAAATTCTCTTCTCATCGTCAATTCTCATCTTCGATTCGTGCCACCTCCGCCTCTCCAATGGCCGCCGCGGATTCTGCTATGGACGCCGTTCAGAGGCGCCTCATGTTCGAGGATGAGTGTATTTTAGTGAATGAGCAAGATCGTGTTGTTGGCCATGAATCCAAATACAACTGTCATCTGATGGAAAAAATTGAGTCTGAGAATTTGCTCCATAGAGCTTTCAGTGTTTTTCTGTTCAACACAAAATATGAGTTGCTACTTCAGCAAAGATCTGCAACGAAGGTAACATTTCCTTTGGTT…	MSVFCGVQIHTLLSFPIRIVNPKIFPQFRSRPIKFSSHRQFSSSIRATSASPMAAADSAMDAVQRRLMFEDECILVNEQDRVVGHESKYNCHLMEKIESENLLHRAFSVFLFNTKYELLLQQRSATKVTFPLVWTNTCCSHPLHRESELVEENFLGVRNAAQRKLLDELGISAVDVPVDQFTPLGRILYKAPSDGKWGEHELDYLLFIIRDVEVRPNPDEVADVKYVDRDQLKEILRKADAGEGGIKLSPWFRLVVDNFLFKWWDHVEKGTLLEVADMETIHKLT
		c38153.graph_c0	ATGGGTCTGGATCGAAATTGGTGGAATTTTTTGGTATTTACAATCTTAATCGGGAAGGATAACAGGATA	MGLDRNWWNFLVFTILIGKDNRI
Branch pathways	GGR	c36469.graph_c0	ATGTCTTCCTCCTCCATCTCCACCACCTTCATCGGCCAGAAATTCAAACTCCAGACCTTAAACCCCACCAAGAAATGCGGCAGCGGCAGCGGCAGAGGCGTCTTCAGGATTCGAGCCGCAAAGGCTAGCCCGAAGCTGTCCGGGCGGCCCCTCCGTGTGGCGGTGGTCGGGGGAGGGCCTGCCGGAGGTGCCGCGGCGGAGACGCTGGCGAAGGGAGGGGTGGAGACTGTCTTGATCGAGAGGAAGCTGGATAACTGCAAGCCTTGCGGCGGGGCCATACCGCTGTGCATGGTGGATGAGTTCGAGCTGCCCCTGGATATCATAGACCGCAGGGTGACCAAGATGAAGATGATATCGCCCTCCAACGTCTCCGTCGACATCGGCCGGACGTTGAAGCCC…	MSSSSISTTFIGQKFKLQTLNPTKKCGSGSGRGVFRIRAAKASPKLSGRPLRVAVVGGGPAGGAAAETLAKGGVETVLIERKLDNCKPCGGAIPLCMVDEFELPLDIIDRRVTKMKMISPSNVSVDIGRTLKPHEYIGMVRREVLDAYLRDRATAAGATVINGLFLKMDKPAAGSGGRYRIHYNHYEKGSVSGEKKEIEVDAVIGADGANSRVAKSIGAGEYDYAIAFQERVKIPDSKMEYYKDLAEMYVGDDVSPDFYGWVFPKCDHVAVGTGTVTHKSEIKKFQAATRLRARDKIEGGKIIRVEAHPIPEHPRPRRVLERVALVGDAAGYVTKCSGEGIYFAAKSGRMCAQAIVEGSENGTRMINEADLRTYLKKFDQMYWPTYKVLDILQKVFYRS…
		c33645.graph_c0	ATGCTCCGGTATCGGATGAGCCTCCACCCTCATCACTTTCCCTCCCCGGATCTTCGGCATGACGCGCTCTCGGATACCCGTCTGATACTTCTTTATGTCGGGTTTGGACACGACGGTGCCCGTGCCGACGGCGACATGGTCGCATTTGGGGAAGACCCACGCGTAGAAATCCGGGGAGACGTCGTCCCCGATGTACATTTCAGCCAGGTCTTCGTAGTAGTCCATCTTGGAAGCCGGAAGACGAATCCGCTCTTGGAAGGCGATCGCGTAGGTGTAGCTACCCGCGTCGATGGCTTTGGCTACTCGGCTGTTCGCACCGTCCGCCCCGATGACCACGTCGACTTCAATAGTCTTCGGTTTGCCGAGGATGGAGCGAGTGGAAGTGTCCGATTCGGTGTA…	MLRYRMSLHPHHFPSPDLRHDALSDTRLILLYVGFGHDGARADGDMVAFGEDPRVEIRGDVVPDVHFSQVFVVVHLGSRKTNPLLEGDRVGVATRVDGFGYSAVRTVRPDDHVDFNSLRFAEDGASGSVRFGVGDYVRIGWGRGELDAGAKAGDQSSTVRLGSVTEKRIQDLTPEHGDVLVGLDGPAEVDGEVGRGEDAHLGDAAVDEVGRDGELVHHAQRDGAAARLRAGGGPLDQVSLDAAAGEGFRG
	CPS	c38275.graph_c1	ATGATTAATGAAGTCAAGGGAATGCTAGGAGCAATTGATGATGGAGAAATAAGTGTATCGGCTTATGATACAGCATGGGTAGCCTTAGTTCAAAACCTAGAAGGAAATGGACAGCCTCAATTTCCTTCAAGCCTTCAATGGATCGTAAATAACCAACTAGACGATGGTTCGTGGGGCGAAGTTGCTATTTTCTCTGCTCATGATCGGATTATCAACACTCTTGGTTGCGTTATCGCCCTAAAATCTTGGGGTGTTCTTCCTGAAAAATGCAATAGAGGACTGATATTTTTAAGAGAGAATATGTGGAGGTTGGGTGACGAAGAAGATGAACTCATGCCTATAGGCTTTGAAATCACTCTCCCTTCACTCATTGATAAAGCAAAGGCCTTGGGGTTACAG…	MINEVKGMLGAIDDGEISVSAYDTAWVALVQNLEGNGQPQFPSSLQWIVNNQLDDGSWGEVAIFSAHDRIINTLGCVIALKSWGVLPEKCNRGLIFLRENMWRLGDEEDELMPIGFEITLPSLIDKAKALGLQLPYDDPALLNIYAKRNLKLKRIPKEVMHEVPTTLLYSLEGMQDLDWNRLVKLQDMDGSFLSSPSSTACALMQTGNVKCLEYLQRITDKFNGGVPTVYPVDLFEHVWMVDRLERLGISWYFEPEIKECLDYVYRYWTEDGICWARNSRVQDADETAMAFRLLRLHGYVVSPDAFKNFEKDGEFFCFAGQTTEAVTGIYNLNRASQVMFPNENILDRAKNFSYKFLREKQAAGHLVDKWVISKDLRGEVEYALDYPFYASLPRVETRW…
		c25167.graph_c0	ATGTTTTTAAGAGAGAACATGTGGAGATTGGGTGAAGAAGCCAACAAACTTATGCCAATTGGCTTTGAAGTTGCTTTTCCTTTGCTCATGGATAAATCGAAGGCCTTGGGGTTACAGATCACTTATGATGATCCAGCTTTGCTGAATATTTATGTGCAGAGAGATCTA	MFLRENMWRLGEEANKLMPIGFEVAFPLLMDKSKALGLQITYDDPALLNIYVQRDL
		c31296.graph_c3	ATGCAATCTAAGAAGCCTGAAAGCCATGGTTGTATCATCGACATCCTGTACGCTAGAATTTTTTGCTCAACATATCCCATCCTCTGTCCAGTACCTCTTTACATAGTCCAAGCAATCTTTGATCTCGGGTTCGAAATACCGAGAAATTTTGAGATGCTCCAACCGATCTACTATCTATATGTGCTCAAAGAGATCCACATGGTAGACATTTGGTACTCTGTTGTTGAATTTATCAGTGATTCGCTGAAGATATTCGAGGTACTTCGCGTTGCCAGTTTGCATAAGAGCACA	MQSKKPESHGCIIDILYARIFCSTYPILCPVPLYIVQAIFDLGFEIPRNFEMLQPIYYLYVLKEIHMVDIWYSVVEFISDSLKIFEVLRVASLHKST
	KS	c4631.graph_c0	ATGACTGAGATCTGGCTTAGATTGATGAAGTCAATGATGAGAGAGTCTGAGTGGCAGTGGAGCAAGACAGTGCCCACATTTGAAGAATACATGCAAAGTGGGTATATTACAATTGCTTTGGAACCAGTCGTTCTGCCAGCAGTCTTATTTGTTGGGCCAAAGCTTTCGGAGGATATCATTAGAGGACCAGAGTACCGTCAGTTGTTCAAGCTTATGGGCACTTGTGGGCGTCTCTTAAATGACACACAGACTTTTGAAAGAGAGAACGAAGCAGGGAAATTGAATAGCGTGCCGATACGTATGCTTCATAGCTGCAGTTCTATTTCTGAAGATGAGGCAAAGAAGGTGATAGAGAAAATGGTCAGCTTTGCCAGGAGA	MTEIWLRLMKSMMRESEWQWSKTVPTFEEYMQSGYITIALEPVVLPAVLFVGPKLSEDIIRGPEYRQLFKLMGTCGRLLNDTQTFERENEAGKLNSVPIRMLHSCSSISEDEAKKVIEKMVSFARR
		c25155.graph_c0	ATGCACGGTAATGTCGTTCTTTCTACAAACAGTTGGTTCCAAGAAAGCAAATTTCCTCAGCTTAAATTTGCTCGACAGACTGCTGCGTACTGCTACCTCTCTGCTGCAGCTACTATTTTCCCTCCTGAAATGTCTGATGCTCGCTTGTCATGGGCAAAACAATGTGTGCTGACAACCGTGGTCGATGATTTCTTCGATGTCGAAGGTTCAAGAGAAGAACTATTAAATCTTATCGCATTGGTTGAGCGGTACGATCTATTTCCTTCTGCCATCTTCCTAGAACCCTATCGGTTGATAAGCATGATTTACGCATTTTCCTCT	MHGNVVLSTNSWFQESKFPQLKFARQTAAYCYLSAAATIFPPEMSDARLSWAKQCVLTTVVDDFFDVEGSREELLNLIALVERYDLFPSAIFLEPYRLISMIYAFSS
		c36769.graph_c0	ATGTTACAATACAATCCGAGAATCCCCTCTCCAACAAGCAGCCCCTTAGCGGATTCGGTTGAAAGTGCAAATTTTAGACCTGAGATTATGCATTTTCTCTCACTCCCACAATGCACTTCCGTTCGTGCGGACCCGAAATATGTTTTTGGAGTTTCTTGTTCTCAGACAACACCGTCCGTCGATTACCGCAATCCCAAAGCATGTGTGGATCATGGATGGAAGACTGATAAAAGTATTTGCATTCCAGTTCAGCACATCGTAGGAGGAAAGGATAGAATCAGGGAGGCATTAAATAAGGTTGAGCTTTCTATTTCTTCCTATGATACAGCATGGGTTGCCATGGTTCCTTCTCCAAGAACCCCGAAGTCTCCATGCTTTCCAAAGTGTATAGAATGGATA…	MLQYNPRIPSPTSSPLADSVESANFRPEIMHFLSLPQCTSVRADPKYVFGVSCSQTTPSVDYRNPKACVDHGWKTDKSICIPVQHIVGGKDRIREALNKVELSISSYDTAWVAMVPSPRTPKSPCFPKCIEWILENQHHDGSWGLPHGDPSLIKDSLSSTLACALALQRWNVGEEHVKRGLHYIRNNYKSVTDKKLPSPIGFDVIFPGMINYAIGLGLDLPMLQTDVDAIHSMRDSKLRRGYSEGSKAYHAYIVEGLSDLQDWQEVMKYQRRNGSLFNSPSATAAAVIHTRDEKALNYLHSLMQKFGNSVPTVHPFDICTHLCIVDDLERFGISRHFSSEIKSILDKIYRCWLDADEEITSDAATFALAFRILRMNGYDVSSGALAQFDKVHHFNNSVH…
Carotenoid biosynthesis	GGPPS	c30585.graph_c0	ATGGCATGCGCAACTCCAAATTCACACCTGACCCCCCTCTTCACACCTAAATTACTTCTCCCCAGGAAAGCAAGCCCCAGAATCGTCACTCGCGTGTTGATTAACAACGACCAACAACAAGTATCTAATTACTGGACTTCACTCAGCTCCGAAATCAACACCCACATCCTCAAATCCCTCCCGGCGACCCCACCACCCTCGGTGACTGTCCCCATGCACCACTTGCTCTCCGCCGCTCCCCCTTCCGTCGCCCCTGCCCTCTGCCTCGCCACGTGCCAGCTCGTCGGCGGCCAGAAGCACCACGCCATGAACACCGCCTGCGCGATCCAGCTCATGCACGCGGCCGCACACGCCCACACCCAGCTCATCCTTAAGCAGGAGAACAGCAAGGTGAAGCCG…	MACATPNSHLTPLFTPKLLLPRKASPRIVTRVLINNDQQQVSNYWTSLSSEINTHILKSLPATPPPSVTVPMHHLLSAAPPSVAPALCLATCQLVGGQKHHAMNTACAIQLMHAAAHAHTQLILKQENSKVKPGIAMMTGDGILPLGYEMVARSECGDNHERIVRVVADMARAMGTQGMVEGQLMEAEEGWEKEWRWERKGGRLSACGAACGAIMGGGREEDVEKLRRFGFYAGMINEMTRSEDDNIIGSYEEAIQLFSSLARLELRGFQHERVGDLLELLLGFGCNTGKENRGVINSSSRTAANNCKLV
		c33260.graph_c0	ATGTCAACCATGGCCATCTCCTTCCTCGGCGTCTCCTCTTTATCCCCTGCCCTTGTGGGCCCTTTCCCCCTCCTCTTCAAGAAATCCATGTCCTCAACCACCACCAATCTCTTCCTCAAGACCCACGCCGTATCATCGTCAAGATCGATGCCCGCCTCCGCCACCTCCACCTTCCCACGAGCTCCCAACAGCACCGCGGGCTTCGACTTCGACTTCGACTTCAAGAATTACATGATCGAGAGGGCCGCCCTCGTCAACAGTGCCCTCGAGGCCGCCGTACCCATCTCCCACCCGGAGAGGATCCACGAGTCCATGCGCTACTCCCTCCTCGCCGGCGGGAAGCGCGTGAGGCCGATCCTCTGCATCGCGGCCTGCGAGCTCGTCGGCGGGGACCGGGAG…	MSTMAISFLGVSSLSPALVGPFPLLFKKSMSSTTTNLFLKTHAVSSSRSMPASATSTFPRAPNSTAGFDFDFDFKNYMIERAALVNSALEAAVPISHPERIHESMRYSLLAGGKRVRPILCIAACELVGGDRESALPAACAVEMTHTMSLIHDDLPCMDNDDLRRGHPTNHVVYGERLAVLAGDALLALAFQILADSLSSGAHPRNVVASVRELARCIGAEGLAAGQVVDIDSTGTKETIGIERLEFIHLHKTAALLEASAVTGAIAGGGTEVQIERLRRYARCVGLLFQVVDDILDVTKSSSELGKTAGKDLASDKTTYPKLLGMDESREFAEELLGDAEEQLREFDAEKAAPLLHLANYIAYRQN
		c39421.graph_c0	ATGGCCTTCTCGTCCTCCGCCCACTTCCTCCTCTCTCCCCACCCCCGCAAACCCCTCTCCATCCGCGCCTCCTCAAACTCTTCTTCCAATTCGTCATCCTCCTTCGACCTCCAATCTTACTGGTCCTCCCTCCTCGCCCAAATCAACACCCACCTCGACTCCTCCATCCCCATTCGCTACCCGGAATCCATCTTCAAGTCCATGCGCCACTCCGTCCTCTCCCCCGGAGCCAAGCGTGTCGCCCCCGTCCTCTGCATCTCCGTCGCCTCCGGCCTCTTCGGCCTTCCCATCCCCGCCGCCCTCCCCACCGCCGCCGCTCTGGAGATGGTCCACGCCGCCTCCCTGATCCAAGACGACCTCCCCTGCTTCGACGCCTCCCCCTCCCGCCGCGGTCTTCCA…	MAFSSSAHFLLSPHPRKPLSIRASSNSSSNSSSSFDLQSYWSSLLAQINTHLDSSIPIRYPESIFKSMRHSVLSPGAKRVAPVLCISVASGLFGLPIPAALPTAAALEMVHAASLIQDDLPCFDASPSRRGLPSNHSLFGVCLAVLAGDSLLPLALDHLTSLTPLEPSVLIPVIKEITRAVGPTGMAAGQFLDLHFQDCNGDGNKAMEIVEKKFGEMGECAAACGGYLGGATEEELGRLRRYGRSVATLYQLVDDVLMTTMERDNGGMRRNVSVVKAVGLERAREMVEEIRVAAKREVEELERKYGETKVMPLYSFLDYAVERGFVFEAAAPPRESVAAID
		c24069.graph_c1	ATGCTACGAACCGAGAAGACAAGATTTATCACACGTTTTGAACTCAGAAGCACGCGGATCTTCCATAGAAAGTTAGAGTCAAAAGACGTTCCCCAGTTTCCCACCATTCCATCCCATCTCACTTCTGCCGGTACGCGATGTAATTCGCCAAGTGCAGCAATGGGGCGGCCTTCTCCTTGTCAAACTCTGCCAGCTGCTCCTTGGCATCCCTCAGAAGCTCCTCAGCAAACTCCCTCGACTTCTCCAGCCCCAGTAGCTTCGGGTACGTCGTCTTGTCGGTCGCCAGGTCCTTGCCGGCCGTCTTCCCCAGCTCCGCCGATGACTTGGTCACGTCCAGTATATCATCGACCACCTGGAACAGAAGGCCCACGCACTTGGCGTACCGCCGCAGCCTCTCGA…	MLRTEKTRFITRFELRSTRIFHRKLESKDVPQFPTIPSHLTSAGTRCNSPSAAMGRPSPCQTLPAAPWHPSEAPQQTPSTSPAPVASGTSSCRSPGPCRPSSPAPPMTWSRPVYHRPPGTEGPRTWRTAAASRSGPP
	PSY	c20256.graph_c0	ATGACAATACAAATGCATGGGTCGGTTTCATCAATATTAGTTAGGAGAGCGCAAAGGAAGAAACCCATTTTGAGTGTATTCTCATTTTGCACAGATTCAAAGCCTGCAGCCCAAGTGAGCTTAGGTACTGAAAACAGTGGCAACTTCCCTTTGCTAGCTACATTGGTAGCGAAACCGGTAGGAGATGTAGCAAGCTCTTCAGAGAAAAAGGTGAATGATGTGGTTCTGAAGCAAGCTGCTTTGGTGAAGAAACAAATGAAGTCTAATGTTTATGTTGAAGTGAAGCCAGAGTTGGATGTTTTGGGAACCATGGGCTTGTTGAAAGATGCTTACGATCGATGTGGAGAATTGTGTGCTGAGTATGCCAAGACCTTCTACTTGGGTACACTGCTTATGACC…	MTIQMHGSVSSILVRRAQRKKPILSVFSFCTDSKPAAQVSLGTENSGNFPLLATLVAKPVGDVASSSEKKVNDVVLKQAALVKKQMKSNVYVEVKPELDVLGTMGLLKDAYDRCGELCAEYAKTFYLGTLLMTPERRKAIWAIYVWCRRTDELVDGPNASHITPTALDRWEERLEDLFAGHPYDMFDAALSDTVTKFPVDIQPFKDMIKGMRMDLRKSRYKNFDELYLYCYYVAGTVGLMSVPVMGIAPDTQVTTENIYNAALALGIANQLTNILRDVGEDARRGRIYLPQDELAQEGLSDEDIFDMKVTEKWRRFMKKQIARARMFFNEAEKGVSELSPASRWPVYASLVLYRQILDEIEANDYNNFTKRAYVSKAKKLLALPKVYGRSLVRPSS
		c31880.graph_c0	ATGGTGGTTGCTATATTACGAGTAGTTTCACCTATAGAGATCCCTATCGGCCTTGGTTTTTCAGAGGCAAATTGGAGATTTTCGGGTCCGAAATATGACAATCTTCACAGAAAGAAATCAAGGTTGAGCGTGTACTCATTATACACCACCTCGAAGTATGCTTGTGTTGGTTTTGAGCCTGAAAGCAATGGAAAATTCCAGATTCGATCGAGCTTAGTAGCAAATCCTGCAGGAGAAGCTACGATCTCTTCTTCGGAGCAAAAGGTTTATGATGTCGTATTGAAACAGGCTGCTTTAGTCAAGGATCAAACTAAAAGTAGTAGAAAATCTACCGATGTGAAACCTGATATAGTTTTGCCTGGGACTGTGTATTTACTGAAAGATGCTTATGATCGATGC…	MVVAILRVVSPIEIPIGLGFSEANWRFSGPKYDNLHRKKSRLSVYSLYTTSKYACVGFEPESNGKFQIRSSLVANPAGEATISSSEQKVYDVVLKQAALVKDQTKSSRKSTDVKPDIVLPGTVYLLKDAYDRCGEVCAEYAKTFYLGTLLMTPERRRAIWAIYVWCRRTDELVDGHNASHITPSALDRWEARLEDLFDGRPYDMFDAALSDTVSRFPVDIQPFMDMVEGMRMDLKKSRYKNFDELYLYCYYVAGTVGLMSVPVMGIAPESLAEAESVYNAALALGIANQLTNILRDVGEDARRGRIYLPQDELAEAGLSDEDVFTGQVTDKWRSFMKRQIKRARMFFEQAEKGVTELSQASRWPVWASLLLYRQILDEIEANDYNNFTKRAYVSKVKRL…
		c41177.graph_c0	ATGTATTTGCTGAAAGATGCTTACGATCGATGCGGCCAATTTTGTGCAGATGGTGTGCTGATGGCACCTGAGAGGAGGAGAGCCATTTGGTCAATTTATGGATGTTCT	MYLLKDAYDRCGQFCADGVLMAPERRRAIWSIYGCS
		c28802.graph_c0	ATGGCAGTTGCGATTTTACGGGTAGTTATTCCAATTGAAATCCCTTCTGGCCTATTTAGAGAAAGTGGTGGGAGAGGAAATGCTTTGAATACAAAAAATGATACTCATAAAAGAAAGAAAATGAGATGGAACTTGTACTCACTTTATACCGAAACAAAGTATTCATGTATTGGATTTGAGACTGAGAACAATATGAATTTTCTGATTCGATCGAGCTTAGTAGCTAATCCAATAAGGGAGTTTGCTACTTCCTCAGAGCAGAAGGTTTATGATGTTGTATTAAAGCAGGCTGCTTTGGTTAAGGATCAGAGGACAATAAGTAAATCTTTTGATGTGAAACCTGACATCGTTATGCCGGGTACTGGGTATTTGTTGAAGGAAGCTTACGATCGATGTGGT…	MAVAILRVVIPIEIPSGLFRESGGRGNALNTKNDTHKRKKMRWNLYSLYTETKYSCIGFETENNMNFLIRSSLVANPIREFATSSEQKVYDVVLKQAALVKDQRTISKSFDVKPDIVMPGTGYLLKEAYDRCGQVCAEYAKTFYLGTLLMTPERRRAIWAIYVWCRRTDELVDGPNASHITPSALDRWEARLEDLFSGRPYDMFDAALSDTVSKFPVDIQPFKDMIEGMRMDLKKSRYENFDELYLYCYYVAGTVGLMSVPVMGIAPESLAPTESIYNAALALGIANQLTNILRDVGEDARRGRIYLPKDELAQAGLSEEDVVNGKVTDKWRSFMRNQIKRARMFFQEAEKGVTELSQASRWPVWASLLLYRQILDEIEANDYNNFTKRAYVSKAKKLA…
	PDS	c39397.graph_c0	ATGAGCATTGTTGGGTTAGTTTCTGCTGTTTGTCCAAGTGGAGGCATCAAAAAGAGATATTTTTCAAAGGGGTTGGACAATTTTCAAGGATTTACAAGTAGTGAATGTCTGGGAATTCAATTGCAAGTGCCGGTTCCATTTTATTCAGGAATTAGACCGAGCCCGAGAGCCACTTCTTTGCAGGTGGTTTGCAAGGATTGCCCACGGCCTGAACTTGAAGGTGCTGTGAATTTCTTAGAAGCTGCCCAAATGTCCGCGTCTTTTTGCAGCTCCCCACGACCAGAAAAAGGTCTTGAAGTTGTAGTGGTTGGTGCAGGCTTGGCTGGACTATCTACTGCAAAATATCTTGCTGACGCAGGTCATAAACCGATATTACTGGAGGCAAGAGATGTTCTGGGA…	MSIVGLVSAVCPSGGIKKRYFSKGLDNFQGFTSSECLGIQLQVPVPFYSGIRPSPRATSLQVVCKDCPRPELEGAVNFLEAAQMSASFCSSPRPEKGLEVVVVGAGLAGLSTAKYLADAGHKPILLEARDVLGGKVAAWKDKDGDWYETGLHIFFGAYPNVQNLFGELGINDRLQWKEHSMIFAMPNKPGEFSRFDFPEVLPAPLNGIWAILRNNEMLTWPEKVRFALGLLPAMVGGQAYVEAQDGLTVTEWMRRQGVPDRVNDEVFIAMSKALNFINPDELSMQCILIALNRFLQEKHGSKMAFLDGNPPERLCMPVVDHIQSLGGRVQLNSRLQKIELNPDGTVKHFVLGNGNIITGDAYVVAAPVDILKLLLPQEWREILYFKKLDKLVGVPVINV…
		c23252.graph_c0	ATGGGCTGTTTAATGGATTTGGTGGATCGATGCAGCGAACCACAACCAATCAGCAGCCTCCGTGGCCTTGGTAAATTCGACTTGGAAGTAGCAGCCATGAGCATTCTTGGGTTAGTTTCTGCAAGTGAAGGCATCAAAAAGAGAGATTTTTCAAAGGGTTTGGACAATTTGAAAGGATTCACAAGTAGTGAATGTCTAGGAATTCAATTGCAAGTGTGGATCCCATTTTATTCAGGAATTAGTCCGAGCCTGAGAGCCACTCATTTGCAGATGGTTTGCAAGGATTGCCCAAGGCCTGAACTTGAAAGTGCTGTGAATTTCTTGGAAGCTGCCCAAATGTCTGCATCTTTTCGCAGCTCTCCACGACCAGAGAAAGGGCTTGAAGTTGTAATTGTTGGT…	MGCLMDLVDRCSEPQPISSLRGLGKFDLEVAAMSILGLVSASEGIKKRDFSKGLDNLKGFTSSECLGIQLQVWIPFYSGISPSLRATHLQMVCKDCPRPELESAVNFLEAAQMSASFRSSPRPEKGLEVVIVGADKYRELRFGQE
	Z-ISO	c26604.graph_c0	ATGTCGACGTCCCTCCTCATCTCCGCCTCGCTTTCTCGTCTCATTCCCTCCAGCGGCCGTCATATCCGCCCTTCCATCTCCGTTAGGGTTCCGTTATCCCTTCAATCTCGCCCTAAAAACCCTAATTTAAACCCTGAAACCCTAAGATTCTCCAATATAATCATCCCTCTAGCTGGTGGCACTTCGATTGGGAAGAACGAAGCGGACGATACGATCTCCGACGAATCTTTGGTCGGAGAGGATTCGGCGAGTTTCGAATTTGGGGAGCAGAAGGTCAGTTCTTGGATCTATTTCGCGGGGATTTTGGGGGCGGTCCTGTTCGCCCTCGATGTCTTGTGGATCGAGCCGTCGACGGGTTATGGGAAGTCGTTCGTGGACGCGGTTTCCAGTATTTCGGAG…	MSTSLLISASLSRLIPSSGRHIRPSISVRVPLSLQSRPKNPNLNPETLRFSNIIIPLAGGTSIGKNEADDTISDESLVGEDSASFEFGEQKVSSWIYFAGILGAVLFALDVLWIEPSTGYGKSFVDAVSSISESKEIAMLILIFIFAAVHSGMASLRDVGEKLIGERAYRVLFAGISLPLAMSTIVYFINHRYDGAQLWQVQSVRGVHELVWISNFISFLFLYPSTFNLLEVAAVDKPKLHLWETGIMRITRHPQMVGQVVWCLAHTVWIGNSVALAASVGLIGHHLFGVWNGDRRLRSRYGEAFDALKSRTSVVPFAAILDGRQKIPKDYYKEFIRLPYLTITALTLGAYFAHPIMQSSSFNLHW
	ZDS	c33832.graph_c0	ATGGCTTCTTTCACTTGTTTAATTCATTCTTCCTCTTTTGGGGTTGGAGGAAAGAAAGTGAAGAAGAACAGGATGATTCAATCAAAGTTGTTTTCGATTCGGTCGGCTTTGGACACTAAGGTGTCTGATATGAGCGTCAATGCTCCAAAAGGATTATTTCCACCAGAGCCTGAGTATTACAGGGGGCCAAAGCTTAAAGTGGCTATCATTGGAGCTGGGCTCGCTGGCATGTCAACTGCAGTGGAGCTTTTGGATCAAGGGCATGAGGTTGACATATATGAATCCAGACAATTTATTGGTGGTAAAGTCGGTTCTTTTGTAGATAAGCGTGGAAACCATATTGAAATGGGACTCCATGTGTTTTTTGGTTGTTATAACAATCTTTTCAGACTTATGAAA…	MASFTCLIHSSSFGVGGKKVKKNRMIQSKLFSIRSALDTKVSDMSVNAPKGLFPPEPEYYRGPKLKVAIIGAGLAGMSTAVELLDQGHEVDIYESRQFIGGKVGSFVDKRGNHIEMGLHVFFGCYNNLFRLMKKVGADENLLVKDHTHTFVNRGGEIGELDFRFPMGAPLHGIRAFLTTNQLKPYDKARNAVALALSPVVRALIDPNGAMQDIRNLDNISFSDWFLSKGGTRTSIQRMWDPVAYALGFIDCDNISARCMLTIFSLFATKTEASLLRMLKGSPDAYLSGPIRKYITDKGGRFHLRWGCREILYDESSNGDTYITGIAMSKATNKKLVKADVYVAACDVPGIKRLIPSEWREWDLFDNIYKLDGVPVVTVQLRYNGWVTELQDLEKSRQLR…
	CRTISO	c31619.graph_c0	ATGGCATTGGCTTCAGCTTTTGGAATTTGGCCCCCCGTCGTTTCGAATTTCAGATTCCGGCGGGAAAAGCGCTCGGTCTTGGCACGAAGCTCCAACTCTCAGCAGCAGCAGCTTCTTTCCAGCAACGGGCTGCCCCCTTCGAAAGAGAAAAACTCTTTTCCAGGGAAACCAGAAGCAGATGTTGTTGTTATTGGAAGTGGTATTGGTGGACTATGTTGCGCTGGACTCTTAGCTAGATACAATAGAGATGTTCTTGTACTAGAAAGTCATGACCTTCCTGGTGGTGCTGCACACTCATTTGAGATAAAGGGTTACAAATTTGACTCTGGTCCATCTTTATTCTCTGGATTTAATTCAAGAGGCCTTCAAGCAAATCCTCTTGCACAGGTCCTTGATGCT…	MALASAFGIWPPVVSNFRFRREKRSVLARSSNSQQQQLLSSNGLPPSKEKNSFPGKPEADVVVIGSGIGGLCCAGLLARYNRDVLVLESHDLPGGAAHSFEIKGYKFDSGPSLFSGFNSRGLQANPLAQVLDALGESVQCASYDSWMVYVPEGEFLSRIGPTEFLKDLEMHAGLDAVCEWKKLLDAVLPMSAAAMAIPPISIRGDLGVLLTAAARYAPSLLKSFVQMGPQGAMGATKLLRPFSEIVDSLELKDPFVRNWVDLLCFLLAGVKSDGILSAEIVYMFAEWYKPGCSLEYPLHGSGAVIDALVRGLQNFGGRLALGSHVEEIVVENDRATGVRLRNGLFIRAKKSCC
		c33278.graph_c0	ATGCTGAAATTAGGGCTTTCTCTCCCCCCTTTAATCGCCTACACCAAAACCCTGGAGGTTCAATCTCCAATTTCTCGCTTTTCGTTTTCAAAATCGAGGGCAAGAAACAGAGCATCTAGATCAGGATTTAGGACCTTGAAGGCAGTTCTGAGCGAAGAGAGAGTGGTAAAAGGGGATGAGGAATTGAAGGGGAAAGGTAAGGGGAAGGAGTACGATGCAATTGTGATTGGCTCGGGGATCGGTGGATTGGTGGCGGGAACTCAGCTAGCGGTTAAAGGAGCTAGGGTTTTGGTCCTTGAAAAGTATGTGATCCCGGGCGGTAGCTCCGGGTACTACGAGCGAGATGGGTTCACTTTCGATGTCGGATCCTCGGTGATGTTTGGATTCAGTGACAAGGGC…	MLKLGLSLPPLIAYTKTLEVQSPISRFSFSKSRARNRASRSGFRTLKAVLSEERVVKGDEELKGKGKGKEYDAIVIGSGIGGLVAGTQLAVKGARVLVLEKYVIPGGSSGYYERDGFTFDVGSSVMFGFSDKGNLNLITQALEAVGCPMEVVPDPTTVHFHLPGNLSVRVHREYSDFITELINKFPHEKEGINKFYSECWKIFNALNSLELKSLEEPIYLFGQFLKKPLECLTLAYYLPQNAGNIARKFIKDTQLLSFIDAECFIVSTVNALQTPMINASMVLCDRHYGGINYPIGGVGGIAKSLARGLEDKGSKILYKANVKSIILEHGKAVGVKLADGREFFSKTVISNATRWDTFGKLLKIDELPEEEKIFQKVYVKAPSFLSIHMGVKASLLPPD…
		c29983.graph_c0	ATGGAGCTCTTGTCTGTTCCCACTTGTGGGTTTTCACCTCGGCAGTCTCTAAGATGTAAAGTTCGCAATGGCAGTGTAGTCAGGCGCTCCGGAATAGTAAGGCCATCAGGAGTCCCGGCGCCCATGGGTCAGAAGACGGAGTACAAAGACGGCGTATTTGAGAAAGTTTTCATGGGTTTGTTTGCTCGTAAAATGGAGAAGTTTGCGTCAAAAAAGAGCGGCGATAAGAATTTGTGGGATTGGGATTACGAGAGCTTTGTTGATGTTTCGAAGAGCGTGATGATGGGAAGGACAAGAAGTCAGCAGCAGGAGGTAGTAAGAGAAGTCCTTCTCTCCATGCTTCCTCCCGGTGCCCCGGCTCAGTTTCGGAAGTTGTTCCCTCCAACCAAGTGGGCTGCT…	MELLSVPTCGFSPRQSLRCKVRNGSVVRRSGIVRPSGVPAPMGQKTEYKDGVFEKVFMGLFARKMEKFASKKSGDKNLWDWDYESFVDVSKSVMMGRTRSQQQEVVREVLLSMLPPGAPAQFRKLFPPTKWAAEFNAALTVPFFHWLVGPSEVIEVEVNGEMQRSGVRIKKCRYLENSGCVGMCVNMCKIPTQDFFTSEFGLPLTMNPNFEDMSCEMIYGQTPPPFQGDPVSNQPCYANLCSMANSNSKICHKLQN
		c31731.graph_c0	ATGGAAGCGATTCTTCTTCCTCGTCTTCAATTTCCCAACATTTCTCCTCCAAAAATTCATCGAAAAAACCCTATATTTCGCTCCTCGTGCTCTCCAGTTCGAGCTCAAACGATCGGTCCAACTAAGTCTGAGTTGAAGCCAGGGCCATTGGATGACCTGTTTCTTGGGTTCTTCAGGAGAAAAATGGTGGAGGAGGTCGGATGGGATTCAGTGAAGCCCGGATATGATGGACTGATTGAAGTTGTGAATCGACTTATGACGAAGGGAAAGAGCAACCTAGAGACTGAGCAATCAGCAGTTCGTGTATTGAAGTCGTTGTTCCCCCCGTTCTTACTCCCCCTTTTTAAGTTGCTTATAGCACCTGTAGGTGAGGGGAGAGTTGCTTCAATGATGGCTGCG…	MEAILLPRLQFPNISPPKIHRKNPIFRSSCSPVRAQTIGPTKSELKPGPLDDLFLGFFRRKMVEEVGWDSVKPGYDGLIEVVNRLMTKGKSNLETEQSAVRVLKSLFPPFLLPLFKLLIAPVGEGRVASMMAARATALSCQWLMGPCSVNSIDLPDGSSCTSGVVVERCKYLEESKCIGICIKTCKLPTQTFFKDCMGIPLHMEPNFGDYSCQFKFGVPIPLPSSDKSLQEPCLEICPNANRRKELSSRNFASQCPQV
		c31086.graph_c0	ATGGAATCTACTCTTCTTCTTCACCATGGAGGCATCAGACACATCCCAACAATACCGGGGCTCAACAACGGGTATCAGAGACCGACCCGTAACCCGAACCCCGCACCCCCTCATCGGATATCTGCGGTTATGGCAGGGCCGATGCACCCAACAGAAGACGAGAAGAAGACAGTGTATAATGATAACTGGTTCGATCGGCTAGCCATTCGTCACCTCTCTCAAAGCATTCAAATCACAACAGGGATAAAGAACGACAAGGATGGGTACCAGGGCATCATCGAGGCAGCGAGTGCGGTGGCGAGGAATTTCGAGATGAAGCATCAGCAAGAACTGGTGATCAAGTCTCTGGAGAAGGCTTTCCCCAGGCCCATCCTGGCAATGATAAGGATTCTTACACCC…	MESTLLLHHGGIRHIPTIPGLNNGYQRPTRNPNPAPPHRISAVMAGPMHPTEDEKKTVYNDNWFDRLAIRHLSQSIQITTGIKNDKDGYQGIIEAASAVARNFEMKHQQELVIKSLEKAFPRPILAMIRILTPPSKFSREFFTVFTTIFFPWLIGKCEVRESQFQVRTEKNVVYIPKCRFLEGTNCVGMCTNLCKIPSQRFIKDSFGMPLHMKPNFEDMSCEMIFGQNPPVDDPALQQPCYKKLCIAKQIHGVKCSS
		c26604.graph_c0	ATGTCGACGTCCCTCCTCATCTCCGCCTCGCTTTCTCGTCTCATTCCCTCCAGCGGCCGTCATATCCGCCCTTCCATCTCCGTTAGGGTTCCGTTATCCCTTCAATCTCGCCCTAAAAACCCTAATTTAAACCCTGAAACCCTAAGATTCTCCAATATAATCATCCCTCTAGCTGGTGGCACTTCGATTGGGAAGAACGAAGCGGACGATACGATCTCCGACGAATCTTTGGTCGGAGAGGATTCGGCGAGTTTCGAATTTGGGGAGCAGAAGGTCAGTTCTTGGATCTATTTCGCGGGGATTTTGGGGGCGGTCCTGTTCGCCCTCGATGTCTTGTGGATCGAGCCGTCGACGGGTTATGGGAAGTCGTTCGTGGACGCGGTTTCCAGTATTTCGGAG…	MSTSLLISASLSRLIPSSGRHIRPSISVRVPLSLQSRPKNPNLNPETLRFSNIIIPLAGGTSIGKNEADDTISDESLVGEDSASFEFGEQKVSSWIYFAGILGAVLFALDVLWIEPSTGYGKSFVDAVSSISESKEIAMLILIFIFAAVHSGMASLRDVGEKLIGERAYRVLFAGISLPLAMSTIVYFINHRYDGAQLWQVQSVRGVHELVWISNFISFLFLYPSTFNLLEVAAVDKPKLHLWETGIMRITRHPQMVGQVVWCLAHTVWIGNSVALAASVGLIGHHLFGVWNGDRRLRSRYGEAFDALKSRTSVVPFAAILDGRQKIPKDYYKEFIRLPYLTITALTLGAYFAHPIMQSSSFNLHW
	LCY-ε	c34291.graph_c0	ATGGAGTGCTTTGGACGCATTGGTGCTGTTACTGCGCTTTCGGTGTCATTCTGTGATAGGAAGTTCAGAATGCGGAGGAGTGTCTTGGCGGGAGATCGGGAGGTGTATACACGAAGGCGTAGAATCGTTGGGAAAATTAGGGTGAGATGCGGGGGCGGAGGCGGAGCTGTGGAGACGACGACGGTGAAGGGCGTGGAGGATTTCGCAGATGAGGAGGATTACATAAAGGCTGGAGGGAGCGAGATTGTCTACGTACAAATGCAGGGGATGAAGAACCCAGTAGAGAAACAGGATAAGATTTCAGATAAGCTATCTTGCATACCTACTGGTGATTCTATCCTGGACTTGGTGGTGATTGGGTGTGGTCCAGCCGGTCTCTCTCTCGCTGCAGAATCAGCT…	MECFGRIGAVTALSVSFCDRKFRMRRSVLAGDREVYTRRRRIVGKIRVRCGGGGGAVETTTVKGVEDFADEEDYIKAGGSEIVYVQMQGMKNPVEKQDKISDKLSCIPTGDSILDLVVIGCGPAGLSLAAESAKKGLNVGLIGPDLPFTNNYGVWEDEFRDLGLEGCIEHVWQDTIVYLDSNDPILIGRAYGRVSRHLLHSELLRRCQEAGVTYLNSKVEKIIESDDGHSIVACEGKLKVPCRLATVASGAASGKLLEYEVGGPRVSVQTAYGVEVEVENNPYDPSLMVFMDYRDYMKEKMQCLDKEFPTFLYVMPMSPTRVFFEETCLASRDAMPFDLLKKRLMSRLEAMGVRILKIYEEEWSYIPVGGSLPNTQQKNLAFGAAASMVHPATGYSVVR…
	LCY-β	c22424.graph_c0	ATGGATACTCTATTGAGAACCCATAACAGGCTAGAATTGCTATACCCACTTCCTGAATTAGCTAAAAGGCACTTCCTGTCCCCTTGCCCCAATCCCCAAAACCCTAATTTCAAGTTTTTCAACAGGAAACCCTATCAAAAAAAGTGTAGAAATGGATATTTTGGGGTAAGTAGTAATCAACTTCTTGACTTGGTGCCTGAAATTAAGAAAGAGCACCTCGAATTCGATCTACCTTTGTATGATCCATCAAAAGCTCTCACCTTGGACCTTGCGGTCGTCGGTGGGGGACCCGCTGGGCTTGCAGTGGCTCAACAAGTCTCGGAGTCGGGCCTTTCGGTTGTTTCGATTGACCCAAATCCGAAACTCATTTGGCCGAATAATTATGGTGTTTGGGTTGAT…	MDTLLRTHNRLELLYPLPELAKRHFLSPCPNPQNPNFKFFNRKPYQKKCRNGYFGVSSNQLLDLVPEIKKEHLEFDLPLYDPSKALTLDLAVVGGGPAGLAVAQQVSESGLSVVSIDPNPKLIWPNNYGVWVDEFEDMDLLDCLDATWSGAIVYVDDHSTKNLGRPYARVNRKNLKSKMMKKCVSNGVRFHQATVVKAMHEEEKSYLICSDGVTINARVVLDATGFSRCLVQYDKPYNPGYQVAYGILAEVEEHPFDVDKMVFMDWRDSHLNGKAELNERNAKIPTFLYAMPFSSNRIFLEETSLVARPGLKMEDIQERMVARLNHLGIRIKSIEEDERCVIPMGGPLPVIPQRVVGIGGTAGMVHPSTGYMVARTLAAAPIVANSIVRYLVSDSGLSG…
	CYP97A3	c34249.graph_c0	ATGGCGTCTACTCACCAGCTTCTTCAATTCCCGCACATACCGACCCAATTCACGAGCAAAACCTATCAGCCACCGACTAAATACCGGCCGTGCCACTCATTCAAATCCCGCCGTCCGATCCGATGCTCCTCCTCATCCAACGGCCGCTCGCCCGAATCTCGAAGCAAAGATTCCTCGCCCGATGGTGCCGTCAAAGATGTGGAGCGGATCCTCGAGGAGAAGCGCCGCTCGGAACTGGCTGCCCGCATCCAATCCGGCGAGTTTACTCTCAACCAATCAGGGACGATTTTGTCGAAACTGGGGCCTGCTGGCAAGTTATTGGAGAGGATTTTGTCCAGGTTGAGGGGCGGTGGAGCCTCCGTGGACGGCCGGCCGGATATACCACAGGCGAGAGGATCG…	MASTHQLLQFPHIPTQFTSKTYQPPTKYRPCHSFKSRRPIRCSSSSNGRSPESRSKDSSPDGAVKDVERILEEKRRSELAARIQSGEFTLNQSGTILSKLGPAGKLLERILSRLRGGGASVDGRPDIPQARGSIAAVGRQAFFIPLYDLFLTYGGIFRLNFGPKSFLIVSDPDIAKHILRDNCKAYSKGILAEILEFVMGKGLIPADGEIWRVRRRAIVPAFHQKYVAAMVNLFGRASYRLCEKLDAAASDGEDVEMESLFSRLTLDVIGKAVFNYEFDSLSVDNGIVEAVYAVLREAEMRSTSPIPTWEIPIWKDISPRQKKVNEALKLINNILDELIAICKRMVEQEELQFHEEYMNEQDPSILHFLLASGDDVSSKQLRDDLMTMLIAGHETSAAV…
	CYP97C1	c13845.graph_c0	ATGACCTTCTTCTCTTCTCCCTTCAACTCTCTCTTCCTTTCTCCCTTCTCGTCCGCAAAATACCACCACCCCAATTCAAGAACCCAACTCCCATTAACCCCATTAATCAAAGCCTCTTCCCGCAAAAACAACAACAGCAGCAGCAGCAGCAGCTCAAAATCCACAAATGGTTCATGGGTCAGCCCCAATTGGCTCACTTCCCTCACACGATCTCTAACTACTCCCGGCGATGACTATTCCAGCATCCCAACTGCAAATGCCAAGCTTGAGGATGTCTCTGACCTCCTTGGGGGTGCTTTGTTCCTACCACTGTTCAAGTGGATGAATGAGTATGGACCCATTTACCGGCTCGCTGCCGGGCCAAGAAATTTTGTGGTCGTGAGCGACCCAGCGATTGCG…	MTFFSSPFNSLFLSPFSSAKYHHPNSRTQLPLTPLIKASSRKNNNSSSSSSSKSTNGSWVSPNWLTSLTRSLTTPGDDYSSIPTANAKLEDVSDLLGGALFLPLFKWMNEYGPIYRLAAGPRNFVVVSDPAIAKHVLKNYGSKYGKGLVAEVSQFLFGSGFAVAEGSLWMARRRAVVPSLHKKYLSVMVDKVFCKCALRLVEKLEPFASNGAAVNMEATFSQLTLDVIGLALFNYNFDSLSLDSPVIDAVYTALKEAEARSTDILPYWQIPFLCKIIPRQIKAERSVTIIRKTVEELITKCEQIVEAEGERIDGEEYVNDTDPSILRFLLASREEVSSVQLRDDLLSMLVAGHETTGSVLTWTLYLLSKNPSALARAQQEVDNILHGRLPRYEDVIELK…
	BCH	c24102.graph_c0	ATGGCTGTCGGGATCTCCGCCGCTCCCCCGGCCCTCGCGATCTCCTCCGCCCCCCGCATCCGCCACGTCATCCTCTTCTCCCCGCTCCACAGCCGTCAGATCGGATCGCCGCCGATCAGGAACCGTCGAAAAAGGAGCAAGTCGACGGTGTTTTTCGCCTCGGACATGGGCGGCGGTGAGGGGATCGTCGGTAAAATCGAGCGGCGGAAGAGACAGGAGCAGCTGATGATCTCGAAATCGCGCACGGCGGAGAGAATGGAGAGGAAGCGATCGGAAAGGACGACGTATCTGATCGCGGCGGTGATGTCGAGCTTGGGGATCACGTCAATGGCGATCGTCTCCGTTTATTATCGATTTGCTTGGCAACTGGAGGAAGGGGAGATTCCAGTGACGGAAATG…	MAVGISAAPPALAISSAPRIRHVILFSPLHSRQIGSPPIRNRRKRSKSTVFFASDMGGGEGIVGKIERRKRQEQLMISKSRTAERMERKRSERTTYLIAAVMSSLGITSMAIVSVYYRFAWQLEEGEIPVTEMLGTFALSVGAAVGMEFWARWAHRALWHASLWHMHESHHRPRDGPFELNDVFAVINAVPAISLLYYGFFNRGLVPGLCFGAGLGITQFGIAYMFVHDGLVHRRFPVGPIADVPYFRRVAAAHQIHHSEKFSGVPYGLFLGPKELEEVGGEEELEKEIKRRIKINGGGFDVK
		c30123.graph_c0	ATGGCGGTCGGGACCTCCACCGCGAATACTACGCTGACAATCACCTTTCAACCGACAAATCGCCGGCTACTCCCCGCCTGCCTCTTTTTCACTCCTCTCTGCACCCGCCGTGTAAACAGCCTGCTTCCGCCCAGGAGCCGACGCAAGCAGAGGGCCACAACCGTCTTCTTACTTCTAGAGGAGACAGGTAGGCCCACCACCACCAGTGAAGAGATCGTCAAAGAAATCCACGACGACGACGATGAGGAGAAGAAACAGGAACAAATTCGGATCTCGAAAGCGCGGGCGATGGAGAGGATGGAGAGGAAGAGATCGGAGCGTAGGGCGTATTTAATAGCGGCCGTGATGTCAAGCTTTGGGATTACATCGATGGCAGCCGCCGCCGTTTACTCCCGATTT…	MAVGTSTANTTLTITFQPTNRRLLPACLFFTPLCTRRVNSLLPPRSRRKQRATTVFLLLEETGRPTTTSEEIVKEIHDDDDEEKKQEQIRISKARAMERMERKRSERRAYLIAAVMSSFGITSMAAAAVYSRFSWQMGGGTIPATEMFGTFALSVGAAVGMEFWARWAHRALWHASLWHMHESHHKPRDGPFELNDVFAIINAVPAICLLSYGFFHRGLVPGLCFGAGLGITLFGIAYMFVHDGLVHRRFPVGPIDNVPYFRRVAAAHQIHHTDKFQGVPYGLFMGPKELEEVGGAEELEEEIQRRIRLSR
	ZEP	c29571.graph_c0	ATGGCCATGGCTCACTTCTATTGCCCAACTCTTCAATTCCACAAAACCCACTCCAGTTTTCCTTGTTTTGAAGATACCCATCTTTCCATTTTCCACAACAAGAGCTCATATGGTAGTGTTAAGCAGAGAAAGTTAGTTAGAAGCTATGCTCAGGCTTCAAGCTCAGTTGGGTCAGAAGAAGATACATTGAGTTCAGTAAAGCTGAACCGTCCGAAGCTTAGGATACTTATAGCTGGTGGAGGGATTGGTGGGTTGGTGCTCGCGTTGGCCGCGAAGAGGAAAGGGTTTGATGTGAAGGTGTTTGAGAGGGATATGAGTTCCATTAGAGGGGAAGGGCAGTATAGAGGGCCCATTCAGATTCAGAGTAATGCTCTGGCTGCGCTTGAAGCTATTGATTTG…	MAMAHFYCPTLQFHKTHSSFPCFEDTHLSIFHNKSSYGSVKQRKLVRSYAQASSSVGSEEDTLSSVKLNRPKLRILIAGGGIGGLVLALAAKRKGFDVKVFERDMSSIRGEGQYRGPIQIQSNALAALEAIDLEVAEEVLSAGCITGDRINGLVDGISGTWYTKFDTFSPAVERGLPVTRVISRMKLQEILARAVGDDIMQNGSNVVDFVDDGSKVEVVLENGQRYEGDLLVGADGIWSKVRKILFGHSEASYADYTCYTGIADFVPPDIESVGYRVFLGHKQYFVSSDVGAGKMQWYAFHKEPPGGTDAPNAKKKRLLKIFDGWCDNVIDLIVATDEEAILRRDIYDRVPIFTWGRGRVTLLGDSVHAMQPNMGQGGCMAIEDAYQLAIELEKSAIQS…
		c36398.graph_c0	ATGACAGAGAACAATGTGGGAGAAGACGCAACTAAGATGAAGCAGTTCGTGCTGAACAAGATGAGAATGCCCGATGTACCTGAAGAGGTAGTAGATATGATCGAAAAGAGCGAAATGGGCAGCGTGGTCTCCTCTCCGCTAAGATACCGCTGGCCATTCGAATTGCTTTGGGGGAACATTAACAAGGGAAATGTGTGTGTGGCCGGAGACGCACTCCACCCGATGACCCCTGATCTGGGTCAAGGAGGATGCTCAGCTCTTGAAGATGGAGTAGTTCTTGCTCGGTGCTTGGGGGAAGCACTTTCAGGTGGCGGAATTGACGGGCCGAATGACAGAATCAAGAACGCGTTGGCCAGGTATGCAGAGGAGAGGAAATGGAGAAGCTTTCAGCTCGTTGCT…	MTENNVGEDATKMKQFVLNKMRMPDVPEEVVDMIEKSEMGSVVSSPLRYRWPFELLWGNINKGNVCVAGDALHPMTPDLGQGGCSALEDGVVLARCLGEALSGGGIDGPNDRIKNALARYAEERKWRSFQLVATSYVLGFIQASESRLLNFLRDKCLSEIMANQTLKMADFDCSKI
		c37373.graph_c0	ATGAACTCAGGAGTCAATTCATCCAAATCCAAGGCTGCGTGCAGCATGTTGATGCGATCGGAAGATGGAAAAGAGCTCCGATCGTTCTCATTCGATGAAGAGGCACCTGGGCAAGAAGTTCGAGCTGTAGAGAGGAAAGTATTGCTCGAGACTCTTGCGAGCCGGCTGCCATCAGATTCGATATTGTACTTGTCGAAGCTAAAATCTCTTTCAAAGCAAGGAAACAGTGGGACTTTGTTAGAACTTGATGATGGACCCCCAATACTTTCCAAGATCGTTATCGGTTGTGATGGCATAAGATCACCGGTTGCGAAGTGGATGGGATTTTCGGAGCCCAACTATGTCGGACATTGTGCGTTCCGAGGCCTCGGCATTTATCCTGAAGGTCAGCCATTCGAA…	MNSGVNSSKSKAACSMLMRSEDGKELRSFSFDEEAPGQEVRAVERKVLLETLASRLPSDSILYLSKLKSLSKQGNSGTLLELDDGPPILSKIVIGCDGIRSPVAKWMGFSEPNYVGHCAFRGLGIYPEGQPFEPKVNYVYGRGLRAGFVPVSPTKVYWFICFNSPTSPGIFHEIQLVKLLYFRLIILKQDQRLPIHPC
		c36057.graph_c1	ATGCACCTGATGACCCCCGACCTCGGCCAGGGTGGGTGCTCCGCGCTCGAGGATGCGATCGTGCTTGTGAGGAACATACGTCATGCTTTGAGCTCTGATGGCAAGATCACGAGCCAAAAAAGCGTGGAAGATGGGATCAAGAATTACGTAAAGGAGAGGAGGTGGCGGGTTGCTGGCTTGATTGTGAGCTCGTATTTATCGGGTTGGGTTCAACAAGGCCGGTCTTGGGCGCTTCGATTCGTTAGGGATCATGTTTTCTATAGGGTTTTCTTCCCCAGAATTGCTAACGTTGTTGCGTATGACTTTGGGGATTTGTCTTCTGCTGCAGCAAATAGAGTC	MHLMTPDLGQGGCSALEDAIVLVRNIRHALSSDGKITSQKSVEDGIKNYVKERRWRVAGLIVSSYLSGWVQQGRSWALRFVRDHVFYRVFFPRIANVVAYDFGDLSSAAANRV
	VDE	c36492.graph_c3	ATGACTCACACTGCAAATAGGTTGAAGTGGGTGGATGAAGGATTTCACCTGCTCGTTTTTAGCGATCACTCTATTAAATCAAGTGATACTAATTTGGAAGCTCTCCAAAGGGAACTAGCTCGATGTGACTTGTTGGTGAATGTTGCAGTTAACGACCAGAAATCAATTGCATGGATCCAGAAAAATAGTGATAGCATCCCAAATGTCATCTGCTTTGAGACACATCCATCTCTTGGAAACAAGCTTGGAGGGTCATATGTCGAAAACAAAGGAGACGACGTATTTGGGATGCTAGCTGATGTTGTAAGACCTCGAAGAAGCAAGGAATATCTGGAAGTGGTCAAAACTGTGTCAGCTGCTTGGGACAGGCATAATTCAGATGATATCAGGTTCTGTTTA…	MTHTANRLKWVDEGFHLLVFSDHSIKSSDTNLEALQRELARCDLLVNVAVNDQKSIAWIQKNSDSIPNVICFETHPSLGNKLGGSYVENKGDDVFGMLADVVRPRRSKEYLEVVKTVSAAWDRHNSDDIRFCLLVIINAYIKPVPILKNLRAKGLSTLGCMLKNCGAEVVNCLFDPNCRKALQCLNSCSPTDQVCNYRCIASYESPYLEAFSLCVLQKNNCLELDAEIPSKPFVPPLSMFRGEILSQEIAEDLFVGWLGTLEWSWRVVAGQNPAYDQFPCQYQLFYRGKARGSFWYEPVFQVTTLDEGKLIWRRRRYRVRRGRSPGTFHFSVLDNGVVSKEFWTIVDVSDDFSWGLFHYSGAAEAAGQSYAGAVLVSPDGMYPFEMGSQRMNLALEKCG…
		c31484.graph_c0	ATGGCATCTGGTGCATTCAGTAGACATGCTGTTTCATATTTCGGATTGTTCCCTAGAAGTAGCATGAGAATTTCCAGAATTGCCAGTCAACACCAGCAAAGTCTAATCAAGGTGAAGCTGTTGCGCGGTGATAGAATTGCTAGAATTAGCATGGGGGCAGAAGCTCAAATACGTGCACGATCGAAGCTTGTATCTGACAAGAAAATTCCTTTTGCATGTGCATTTAGAAGATCTGACACAGATATATTCAGCTCTGAGATTGATGGTGTAGAATTTTCTGCAGAGCTTCTATGGAATGTCATGAAACAGTGGCGGCAAGCGCAGGTGATTGCTATAGTTGGGGTACTGTCGTACGCATTATTAGCTATTCCATCAGCTGGCGCGGTTGATGCACTCAAA…	MASGAFSRHAVSYFGLFPRSSMRISRIASQHQQSLIKVKLLRGDRIARISMGAEAQIRARSKLVSDKKIPFACAFRRSDTDIFSSEIDGVEFSAELLWNVMKQWRQAQVIAIVGVLSYALLAIPSAGAVDALKTCTCLLKECRVELAKCIANPSCAANIACLQTCNDRPDETECQIKCGDLFENKVVDEFNECAVSRKKCVPTKSDVGEFPVPDPSTLVKSFNISDFTGKWFITSGLNPTFDTFDCQLHEFHVESNKLVGNLAWRIRTPDGGFFTRSAVQRFVQDPSQPGILYNHDNEYLHYQDDWYIISSSIENQPDDYVFVYYQGRNDAWDGYGGAFVYTRSSVLPETIIPKLEKAAQSVGRDFSKFIKTDNTCGPEPPLVERLEKTVEEGEKTIIR…
	CCS	c35123.graph_c0	ATGACGAGTGTCCCTCTATCTTCGTTCTTCTCCGCTAAACACCCTTTAAACCCCAAAAGACCCCCCACCAGAATCCAATCCCTCCATAGTTTCTTAGATTTAGAACCTGAGTCCAAACCCGAAACCCTATCCATAGACATCCAATACCACGATCGCCTATCCGGATCCAAACCCGATAGCTATGACGCTGTCGTTATAGGGTGCGGGCCATCGGGGCTCCGCTTGGCCCAACAGGCCAGCAGGCGCGGGATGCGTATCTGCTGTGTTGACCCGAACCCGCTAATGGGCTGGCCTAATAATTACGGGTCTTGGGTCGATGAGTTCGAGGAGATGGGCCTAGAGGATTGTATGGATTACACGTGGCATTTGGCAAGTGTTGTGGTTGACGATGGGAGGCAG…	MTSVPLSSFFSAKHPLNPKRPPTRIQSLHSFLDLEPESKPETLSIDIQYHDRLSGSKPDSYDAVVIGCGPSGLRLAQQASRRGMRICCVDPNPLMGWPNNYGSWVDEFEEMGLEDCMDYTWHLASVVVDDGRQKDLHRPYGRVCRGVLKRRLMEDCVEVGVRFHEAKAWSVDHEEFRSMITCSDGSIISANLIIDASGFTSPFMAYDSPRDSQGYQIAHGILAEVKSHPFDLNKMLLMDWRDSHLDNEPYIRPNNHKCPTFLYAMPLDSNLIFLEETSLVSRPILSYVEIKKRMVARLRHLGISVKRVIEEEKCLIPMGGPLPKIPQNVMGIGGTCGLVHPSTGYMVARALSLCPTVADAMVECLGSTRMIRGKQMHARIWNGLWTAEMKREREFYRFG…
Carotenoid degradation(cleavage)	CCD1	c32109.graph_c0	ATGGGAGTTGAAGATGAGAAGAAGCAAGGGCAAGTTCAAAAGAGTGGAGGAGGGATTGTGAGAGTTGAGCCAAAACCCAGCAAGGGGATCATATCAACAGCAGTGGATTTGATAGAGAAAGCCATTGTTTATTTCATGTATGATTCATCAAAGCCCAACCACTTTCTCTCTGGCAACTTTGCGCCTGTCAAAGACGAGACCCCTCCTTGTGCGGATCTCCCTGTTCTTGGCTCTCTCCCTGAGTGCTTGAATGGGGAGTTTGTGAGAGTTGGGCCTAATCCTAAGTTCATGCCTGTTGCTGGTTGTCACTGGTTTGATGGTGATGGAATGATTCATGGCATGCGTATTAAAGATGGAAAGGCAACTTATGTTTCACGTTATGTTAAAACATCGAAGCTT…	MGVEDEKKQGQVQKSGGGIVRVEPKPSKGIISTAVDLIEKAIVYFMYDSSKPNHFLSGNFAPVKDETPPCADLPVLGSLPECLNGEFVRVGPNPKFMPVAGCHWFDGDGMIHGMRIKDGKATYVSRYVKTSKLKQEEFFAGAKFMKIGDLKGLFGLFMVQMQLLRTKLKILDVSFGTATGNTALIYHHGKLLALSEADKPYVVKVLEDGDLQTLGMLDYDKRLSHSFTAHPKVDPFTDEMFTFGYSHSPPYVTYRVISKDGVMHDPVPITIPDPVMMHDFAITENYAIFMDLPLYFRPKEMVKGKLIFTFDNTKKARFGILPRYAKDEHLIRWFELPNCFIFHNANAWEEGDEVVLITCRLENPDLDMVNGSAEDRLDNFTNQLYEMRFNMKSGAASQK…
		c34049.graph_c0	ATGGGGACCGAATCTTATGAGAAATACAATGGGAAAATTTTGGAAGTTGAGCCAAAACCCAGGAAAGGGCTGATTTCTTCAGCATTGGATTTGATAGAGAGAGCCATTGTTTACTTGATGTATGATCCTTCAAAGCAAAACTTGTATTTGTCTGGGAATTATGCACCTGTGAAAAATGAGACGCCGCCGTGCGCTAATCTCCCTGTTAGAGGCTCATTACCTGATTGTTTGAATGGGGAGTTTGTTAGAGTTGGGCCTAATCCTAGGTTTGTGCCCGTGGCCGGATATCACTGGTTTGATGGAGATGGAATGATACATGGCATGCGAATCAAAGATGGGAAAGCAACTTATGTTTCACGTTATGTGAAAACATCACGGTACAAGCAGGAAGAGTTTTTT…	MGTESYEKYNGKILEVEPKPRKGLISSALDLIERAIVYLMYDPSKQNLYLSGNYAPVKNETPPCANLPVRGSLPDCLNGEFVRVGPNPRFVPVAGYHWFDGDGMIHGMRIKDGKATYVSRYVKTSRYKQEEFFGGPKFIKLGDLRGLYGLFLFLIQILRSKFKILDLSYGEGTGNTGLIYHFGKLLALHEGDKPYVIKVLEDGDLETLGLLDYDKRLSHTFTAHPKIDPFTDEMFTFGHSQSPPYVTYRVVSKDGEMHEPVPITIPDPILMHDFAITENYAIFMDLPMYFQPKETVKGKWIYAFDNTKKAHFGILPRYAKDEQLIRWFELPNCFIFHNANAWEEGDEIVLITCRIENPDLESATGADKKSGDFKIDLYEMRFNMKSGAASQKQLSVSAV…
		c19552.graph_c1	ATGGTTATAAAATATATGATGTATCATTTAGCTTGTAAAGAAACTCTATGTACTTGGTCGATCTCCATCTTAATAGAAGATCCTTGCTATGTCGTAAATCTAGAGTTCCAGTATGAGTATTGTATTCTTTCATCCCATGATGAAAGAGAGAGCCTTCATTTATTCACTATG	MVIKYMMYHLACKETLCTWSISILIEDPCYVVNLEFQYEYCILSSHDERESLHLFTM
	CCD4	c37669.graph_c0	ATGCTCCACTCCATCACCCTCTCCCATTCTGGAGGGATCCTCTCCTCCCGCTTCATCCACACCTATAGATACTCCCTAGAGGAGTCTGCGGGCCGCCCTATATTCCCAAAGGTCTTATCCGGGCTCCATGGCCTCAACGGCATCGCTCGCTTGGCTGTCTGGGCCCTACGGACCCGCACCGGACAGGTGAATTCCGCCCTCGGCTCGGGTCTCGCGAACACGAGCTTGTTGTTCTTCGCAGACAGAATCTATGCCCTGGCGGAAGAAGACCTGCCTTATGCAATGGAGATCAACGAGGCCACCGGTGACATTAGTACGGTGGGGCGATATGACTTTGACGGGAAGCTTTCGTCGGCCATGACAGCGCATCCGAAGATAGACCCCGAGACCGGGGAGATG…	MLHSITLSHSGGILSSRFIHTYRYSLEESAGRPIFPKVLSGLHGLNGIARLAVWALRTRTGQVNSALGSGLANTSLLFFADRIYALAEEDLPYAMEINEATGDISTVGRYDFDGKLSSAMTAHPKIDPETGEMFAFRWGLERPYATYFWFDGQGNKSGPDVSIFSLKHPTCLHDFAITKNYAIFNDLQIVIRPMEMLLGDGSPMRLDPQKVPRVGLLPRYATSDSEMRWFNVPGFNAPHTLNAWEEEGGSVIVLIASNVHPIEHSIERMDLIRCSPEMLKIDLRTNTVTRTALSSHNLDFAVINPSFVARKNRFAYTAIGDPMPKIRGIAKLDLDKVGSGDCVIGRRMFGEGCFGGEPFFVANDDGGSGDEDDGHVLSYVHDEGRDQSWFVVMDAKSPD…
		c34919.graph_c0	ATGGATTCCCTCTCCACCACTTTCCTTTCATCCACCCACCACCTCCTCCATGCTAACATCCACCCGCCACCCCTCCCCCGCCAACCTCTCCAGATCTCTGCCGTCAGCACCGAGGAGAAACCACCCCAGATTGCCCTACCCACAAAGACCAAGAAATCCCCCACCATTGCCGAGCCAAAACGACTGCCATCGCAATCTCGGATTACCAAAATCAACGACACACCACCAGCTCGGCACCGGCCTCAACCCTCGCCCGCGGCCGCATTCTGCAACGCCCTGGACGGTATCATTGACGCCTTCGTCGACCCCCCGGTCCTCCGCCCCTCCGTCGACCCCCGCCACGTCCTCTCCTCCAACTTCTCCCCCGTCCCCGAGCTCCCCCCTACCCCGTGCACCCTC…	MDSLSTTFLSSTHHLLHANIHPPPLPRQPLQISAVSTEEKPPQIALPTKTKKSPTIAEPKRLPSQSRITKINDTPPARHRPQPSPAAAFCNALDGIIDAFVDPPVLRPSVDPRHVLSSNFSPVPELPPTPCTLIRGAIPDSLVGGAYIRNGPNPQHLPRGPHHLFDGDGMLHSILLSPSGPVLSSRFVRTYKYSLEHAAGAPVFPNVFSGFHGVGGIARGAVSAVRVLTGQMNPAQGVGLANTSLTYFANRLYALGESDLPYSMKVDRDTGDISTVGRCDFDGKLVMGMTAHPKIDPATGEMFAFRYGPVPPYVTYFRFDREGNKGPDVPIYSVARPSFLHDFAVTENYAIFNDIQIVMQPMEMVFGGGSPVGSDPGKVPRVGLLPRYAVSESEMRWFD…
	CCD7	c46794.graph_c0	ATGCAGCTAGCCGAGTCTAAATCCCCGGTCAACCTACAGGTGGTCGAGGGATTCGTTCCTTCCGACTTCCCACGGGGGACCTACTATCTAACGGGTCCGGGTATGTTTACTGACGATCATGGGTCGACAGTCCATCCCTTGGATGGGCACAGATACCTTCGAGCGTTTGATTTCAGAGAT	MQLAESKSPVNLQVVEGFVPSDFPRGTYYLTGPGMFTDDHGSTVHPLDGHRYLRAFDFRD
	CCD8	c32369.graph_c1	ATGTCTTCAATGGTGGTCCCTTGTGCAAGTCGTCTGCCACGCGTCAAGTCGGGCTCGGCTGGGCCGAACCCATCGGGTCGAAGGCTGCAGGTACCTTCGACGGGTCTCAAATCTTGGCGACGAGAGAATTTGGATGCGATCCGGGTGGCAACGTCGAGCCCGACGGCGGTCGAGAGTGAGGAAGTTGGCCGGGGAGAGAAGCTGGCTGCATGGACCAGCATCCGGCAAGAGCGATGGGAGGGCGAGCTTGAAGTGGAAGGGGAGATCCCGTTATGGCTGAATGGCACCTACCTTCGGAATGGGCCTGGACTCTGGCAAATCGACGGCTACAATTTCCGCCATCTTTTCGATGGTTACGCCACCATCGTCCGCCTCCACTTCCACAACGGCCGCCTGACT…	MSSMVVPCASRLPRVKSGSAGPNPSGRRLQVPSTGLKSWRRENLDAIRVATSSPTAVESEEVGRGEKLAAWTSIRQERWEGELEVEGEIPLWLNGTYLRNGPGLWQIDGYNFRHLFDGYATIVRLHFHNGRLTFGHRQIESDAYKSAVKNKRICYREFSEVPKTDSFLSYVGELASLFSGASLTDNANTGVVKLGDGRVVCLTETIKGSIQIDPNTLDTIGKFEYTDGLGGLIHSAHPIVTDSEFLTLLPDLIRPGYNVVRMDPGTNERRVIGRVDCRGGPAPGWVHSFPVTEHYVVVPEMCLRYCAKNLLRAEPTPLYKFEWHPDSMSYVHVMCKASGRIVASVEVPNFVTFHFINAYEETDEDGRVTAIIADCCEHNADTTILDNLRLQNLRLYAGQ…
	NCED1	c33223.graph_c0	ATGGCTTCTATTTCTTCCAATCCACTCCTAAAACCCCATCACAGATTATCACTAAACCCTTCAAAACCACCATCTAAACTATCAAGAATCCATTGCTCATCGTCTCCTCATTCGCTTCTCGACCTCCCATCCCAATCCCCTCAATCCTACAACTGCCCCACTCCCCTCGTCAAACAAGAACCCGATATCAATATCACGCACTCGAATCCGATAACAATCATACCCTCTACGAAATCCTCTCAAAAACCCAAATGGAACATCTTTCAGCAGGCCACAGCGGCGGCCTTGGATGCAATTGAGCAGAACTTCATATCGAAAGTCCTCGAAAAGCCGCACCCTCTGCCCAAGACGGCCGACCCGAGAGTTCAGATTTCGGGTAATTATGCCCCAGTGAGCGAG…	MASISSNPLLKPHHRLSLNPSKPPSKLSRIHCSSSPHSLLDLPSQSPQSYNCPTPLVKQEPDINITHSNPITIIPSTKSSQKPKWNIFQQATAAALDAIEQNFISKVLEKPHPLPKTADPRVQISGNYAPVSEQEPHQSLPVEGRIPPFINGVYVRNGANPLLEPVAGHHLFDGDGMIHAVTFRNGKAAYCCRFTETERLKQEREIGKPVFPKAIGELHGHSGIARLMLFYARGLIGLLDSSNGTGVANAGLIYFHDRLLAMSEDDLPYHVKITPNGDLETVGRYDFDGQLSSAMIAHPKLDPVSKELFALSYDVIQKPYLKYFRFSPDGKKSADVEIELDQPTMMHDFAITENFVIVPDQQVVFKLQEMIRGGSPVIYDKNKIARFGILPKYAKDAKE…
	AAO3	c20400.graph_c0	ATGTCCTTGAGAGGTATTAGCCTATCAACCAATACACTAAAAGCAAGCCGAACTGCTTCACAACTTGATTCAGATGTGGTGCTGGCTCAAATGTTATCTAAAACTAGTTTCAAACGTTTTGGAGGATCAAGGTGTATTTATATG	MSLRGISLSTNTLKASRTASQLDSDVVLAQMLSKTSFKRFGGSRCIYM
	CYP707A	c32258.graph_c0	ATGAATTCAACCACTGCAACCACCATTTCAACGCTTTTCTTCCCATCTCTCCTACTCTTCATCTTCCTCCCTTTCCTTTGCCTCCTTTGCTTTCCTCTCTCCTCAAGAAAGAGACTCATGAGCCATAACAACAAGAGAAAGCTCCTCTTACCTCCCGGCTCGATGGGTTATCCTTACATAGGAGAGACTTTCCAACTCTACTCGAACAACCCGAATACTTTCTTTGCTCAAAAGCAGGAGAAGTATGGGCCAATCTTCAAGACCCACATCTTGGGTTGCCCTTGCATCATGGTTTCTAGCCCGGAAGCCGCTAAGTTTGTGCTAGTGACGAAAGCGCACTTGTTCAAGCCGACGTTCCCTGCGAGCAAAGAGAGGATGTTGGGTCCTCAGGCGATCTTC…	MNSTTATTISTLFFPSLLLFIFLPFLCLLCFPLSSRKRLMSHNNKRKLLLPPGSMGYPYIGETFQLYSNNPNTFFAQKQEKYGPIFKTHILGCPCIMVSSPEAAKFVLVTKAHLFKPTFPASKERMLGPQAIFFQQGEYHSKLRKLVLRAFMPDATRKSVPWIEEVAVRALKSWDGRLINTFQEMKTYAFNVALVSIFGRDEISSIEELKQCYYTLEKGYNSMPVNLPGSLFHKSMKARKQLGQIVANIISFRRQRNVEANDLLGSFMEAKEGLTDDQISDNIIGVIFAARDTTASVLTWIVKYLGENPSILKAVTEEQEDIMKSKETTLTWADTKRMPFTSRVIQETMRVASILSFTFREAVEDVEYRGYLIPKGWKVLPLFRNIHHSEENFTDPEKF…
		c8805.graph_c0	ATGCTAGCATTTCCTGTGAAGTTTCCAGGCACCAGATTTTACAAAGGCTTAAAGGCTAGAAGTAGAATTATGAATGCTCTAAACGAAAAGCTAGCTCGGAGGAGAAAGGGCTTGGAGTATCACGATGATTTCTTACAATCGTTCGTGAGGGATGAATCCAAATTAGACGATGAACAATCGTCGAATTCAGAAATTTTGGATAATATCTTGACCCTTATAATTGCAGGCCAGATAACCACGGCGAGCTCAATAGCATGGATGGTGAAGTACTTGGATGAAAACCAAGACGTTCAAGAGAAACTTAGAGCATTGCAATTGCACCTAGCATTTGGTGCTCATGGGTCATCCCTTGGGCTTGAAGCTCTGAATGAGATGTCATATGCTTCTAAGATTGTGAAG…	MLAFPVKFPGTRFYKGLKARSRIMNALNEKLARRRKGLEYHDDFLQSFVRDESKLDDEQSSNSEILDNILTLIIAGQITTASSIAWMVKYLDENQDVQEKLRALQLHLAFGAHGSSLGLEALNEMSYASKIVKESLRMATIVSWFPRVALKDCQIEGFRVQKGWVVNIDARAVHFDPSAYDEPVNFNPSRFDEDPKSYSFLAFGVGGRTCLGMNLAKAMMLVFLHRLVTTYRWKVTDPDPSLEKWALFPRLRSGCPIRVLPIGDDATSPLNS
		c25755.graph_c0	ATGCTGTTATTCTGGGTTCTTGTAGTACCCCCTTCTGTACAACTTGTTTCTCTTCTCTCTGAGGGAATAGCCTTTGGCTTTGCATCCCTCATCGATAATCTTACTCTTGGATTTGTATATGTATCATGTTGCCTCATTTTTTTAACTCAGTTAAAAGCAATTTGCAATCCTTTGATTGCAAAAGCCTGTCAATGTCTTGCA	MLLFWVLVVPPSVQLVSLLSEGIAFGFASLIDNLTLGFVYVSCCLIFLTQLKAICNPLIAKACQCLA
		c35999.graph_c2	ATGAAAGAACCCAAGGGGGAGGGAAGGCAGTCGCCGAAGGGGGAGGGAAGGAGTCCGTCTGCCAAAGGGGAAGGAGAGGAGGCCGTCCGCCGAAGGAGGCAGGAGAAGGGAGGAGGCCGTCGACGAAGGAGGCAGGAGAGGGGAGGAGGCCGTCCACCGAAGGGGAGAGGGAATGGGAGAGAGGAGCGCAAGCAGATTAGGGCTTTAAGCAATGCCCGCGCATTTTTT	MKEPKGEGRQSPKGEGRSPSAKGEGEEAVRRRRQEKGGGRRRRRQERGGGRPPKGRGNGREERKQIRALSNARAFF
		c26362.graph_c0	ATGGTTTCTAGCCCGGAGGCCGCTAAGTTTGTCCTTGTGACGAAGTCCCATCTCTTCAAGCCGACTTTCCCGGCTAGCAAAGAGAGGATGTTGGGCCCTCAGGCTATTTTCTTTCAGCAGGGACAGTACCATGCCAGATTGAGGAAGCTCGTGCTCCGAGCTTTCATGCCCGAGGCCACCAAAGGCAATGTTGGTGGAATCGAGGAGATTGCTATGAGAGCTCTCGAGTCGTGGGATGGCCAACTGATCAATACTTTCCAAGAGATGAAGACTTATACATTTAATGTGGCACTCCTATCTATATTTGGAAAAGATGAGATTTCCTCAATTGAAGAGCTCAAGCAATGCTACTACACTTTGGAGAAGGGATACAACTCTATGCCCATTAACATTCCAATG…	MVSSPEAAKFVLVTKSHLFKPTFPASKERMLGPQAIFFQQGQYHARLRKLVLRAFMPEATKGNVGGIEEIAMRALESWDGQLINTFQEMKTYTFNVALLSIFGKDEISSIEELKQCYYTLEKGYNSMPINIPMTRFHKSMKARKQLGQIVANMISSRRKRNVEVNGLLGSFMESKGALTDDQIADNIIGVIFAARDTTASVLTWIVKYLGENPSILRAVTEEQEEIIKSKELTDGED
	BG1	c40682.graph_c0	ATGAAGGATCGTGTCGGTCATAGATTGCCAAAATTCACAGAAGCTGAGAAGAAGTTGCTAAAGGGTTCTACAGATTACGTAGGAATGAATTACTATACTTCAGTGTTTGCAAAAGAAATTAGCCCTGATCCTAAGAGTCCGAGTTGGACGACTGATTCTCTTGTTGATTGGGATAGCAAGAGTGTGGATGGATACAAAATTGGTAGCAAGCCGTTTAATGGTAAACTGGATGTGTATTCAAAAGGTTTGAGATACCTTTTGAAGTATATTAAGGATAACTATGGCGACCCAGAAGTTATCATTGCCGAGAATGGATACGGAGAAGACCTTGGAGAGAAGCACAATGACGTAAACTTTGGGACACAAGATCACAACAGAAAATATTATATCCAAAGGCAT…	MKDRVGHRLPKFTEAEKKLLKGSTDYVGMNYYTSVFAKEISPDPKSPSWTTDSLVDWDSKSVDGYKIGSKPFNGKLDVYSKGLRYLLKYIKDNYGDPEVIIAENGYGEDLGEKHNDVNFGTQDHNRKYYIQRHLLSMHDAICKDKVNVTGYFVWSLMDNFEWQDGYKARFGLYYIDFQNNLTRHQKVSGKWYSEFLKPQFPTSKLREEL
		c47911.graph_c0	ATGGTGAGGTTCGAGAAGGTTCATTTAGTGTTAGGGTTAGCTCTGGTTCTAACTCTGGTCGGAGCTCCGACCAAAGCCCAAGGACCTGTTTGCGGTGCAGGCCTGCCTGACAAATTTAGCAGATTAAACTTCCCTGAAGGCTTCATTTGGGGAACCGCAACAGCAGCATTTCAGGTTGAAGGAGCTGTTAATGAAGGTTGCAGAGGTCCAAGCATGTGGGATACTTTCACTAAGAAGTTCCCACATAGATGTGAAAATCATAACGCTGATGTTGCTGTGGATTTCTATCATCGTTACAAGGAAGATATCCAGTTGATGAAAGACCTTAACACTGATGCTTTTAGACTTTCTATTGCGTGGCCCAGAATATTCCCCCATGGAAGGATGTCTAAGGGAATA…	MVRFEKVHLVLGLALVLTLVGAPTKAQGPVCGAGLPDKFSRLNFPEGFIWGTATAAFQVEGAVNEGCRGPSMWDTFTKKFPHRCENHNADVAVDFYHRYKEDIQLMKDLNTDAFRLSIAWPRIFPHGRMSKGISKVGVQFYHDLID
