# Supplementary material for: Structure of Pigment Metabolic Pathways and Their Contributions to White Tepal Color Formation of Chinese Narcissus tazetta var. chinensis cv Jinzhanyintai
Source: Int J Mol Sci. 2017 Sep 8;18(9):1923. doi: 10.3390/ijms18091923 (PMC5618572; doi:10.3390/ijms18091923)
Supplement: Supplementary file 1 [file ijms-18-01923-s001.zip › R-Table S12.xlsx]

## Sheet: STable 9
Table S9. List of unigenes of carotenoids metabolic pathway in tepal transcriptome of Chinese narcissus.
Pathway	Gene	Gene ID	Length (bp)	Sequence integrity	E-value	Reference annotation	Reference sequence id	T2 (RPKM)	T3 (RPKM)	T4 (RPKM)	T5 (RPKM)
MEP pathway	DXS	c22356.graph_c0	243	0.1136	3.01537e-11	Probable 1-deoxy-D-xylulose-5-phosphate synthase 2, chloroplastic OS=Oryza sativa subsp. japonica GN=Os07g0190000 PE=2 SV=1	sp|Q6YU51|DXS2_ORYSJ	0	1.93	4.23	15.08
		c33545.graph_c0	2186	1	0	Probable 1-deoxy-D-xylulose-5-phosphate synthase, chloroplastic OS=Capsicum annuum GN=TKT2 PE=2 SV=1	sp|O78328|DXS_CAPAN 0	3.41	3.77	4.58	3.46
		c27779.graph_c0	168	0.0785	2.65402e-45	Probable 1-deoxy-D-xylulose-5-phosphate synthase 2, chloroplastic OS=Oryza sativa subsp. japonica GN=Os07g0190000 PE=2 SV=1	sp|Q6YU51|DXS2_ORYSJ	2.69	1.6	3.86	16.59
		c39384.graph_c0	2127	0.9944	0	Probable 1-deoxy-D-xylulose-5-phosphate synthase 2, chloroplastic OS=Oryza sativa subsp. japonica GN=Os07g0190000 PE=2 SV=1	sp|Q6YU51|DXS2_ORYSJ	3.77	2.91	36.28	872.78
		c32761.graph_c0	471	0.219	3.52907e-63	1-deoxy-D-xylulose-5-phosphate synthase, chloroplastic OS=Arabidopsis thaliana GN=DXS PE=1 SV=2	sp|Q38854|DXS_ARATH	25.52	25.55	25.8	30.26
	DXR	c33913.graph_c0	1410	0.9937	0	1-deoxy-D-xylulose 5-phosphate reductoisomerase, chloroplastic OS=Oryza sativa subsp. japonica GN=DXR PE=2 SV=2	sp|Q8W250|DXR_ORYSJ	84.42	198.95	503.46	778.92
	MCT	c25490.graph_c0	849	0.9529	1.37105e-126	2-C-methyl-D-erythritol 4-phosphate cytidylyltransferase, chloroplastic OS=Oryza sativa subsp. japonica GN=ISPD PE=2 SV=1	sp|Q5N8G1|ISPD_ORYSJ	21.52	19.76	9.57	15.54
	CMK	c32121.graph_c0	1248	1	0	4-diphosphocytidyl-2-C-methyl-D-erythritol kinase, chloroplastic/chromoplastic (Fragment) OS=Solanum lycopersicum GN=ISPE PE=1 SV=1	sp|P93841|ISPE_SOLLC	58.59	74.23	82.1	79.15
	MDS	c22809.graph_c0	684	1	6.90372e-112	2-C-methyl-D-erythritol 2,4-cyclodiphosphate synthase, chloroplastic OS=Oryza sativa subsp. japonica GN=ISPF PE=2 SV=1	sp|Q6EPN6|ISPF_ORYSJ	109.91	163.18	231.93	260.5
	HDS	c58793.graph_c0	111	0.0499	3.58002e-22	4-hydroxy-3-methylbut-2-en-1-yl diphosphate synthase, chloroplastic OS=Arabidopsis thaliana GN=ISPG PE=1 SV=1	sp|F4K0E8|ISPG_ARATH	0	0	0.83	0
		c35510.graph_c0	2235	1	0	4-hydroxy-3-methylbut-2-en-1-yl diphosphate synthase, chloroplastic OS=Oryza sativa subsp. japonica GN=ISPG PE=2 SV=1	sp|Q6K8J4|ISPG_ORYSJ	52.18	302.76	650.35	974.85
	HDR	c32513.graph_c0	1380	1	0	4-hydroxy-3-methylbut-2-enyl diphosphate reductase, chloroplastic OS=Oryza sativa subsp. japonica GN=ISPH PE=2 SV=1	sp|Q6AVG6|ISPH_ORYSJ	174.9	428.62	1071.87	1609.42
	IPPI	c29614.graph_c0	855	0.9194	5.72278e-148	Isopentenyl-diphosphate Delta-isomerase II OS=Camptotheca acuminata GN=IPI2 PE=2 SV=1	sp|O48965|IDI2_CAMAC	82.94	97.15	159.05	174.37
		c38153.graph_c0	69	0.0804	1.43008e-27	Isopentenyl diphosphate isomerase [Narcissus tazetta]	gi|478427861|gb|AGI98129.1|	11.31	13.31	7.29	9
Branch pathways	GGR	c36469.graph_c0	1386	0.9957	0	Geranylgeranyl diphosphate reductase, chloroplastic OS=Nicotiana tabacum GN=CHLP PE=2 SV=1	sp|Q9ZS34|CHLP_TOBAC	506	139.15	9.59	18.58
		c33645.graph_c0	750	0.5353	3.78634e-135	Geranylgeranyl diphosphate reductase, chloroplastic OS=Arabidopsis thaliana GN=CHLP PE=1 SV=1	sp|Q9CA67|CHLP_ARATH	13.45	1.98	0.26	0
	CPS	c38275.graph_c1	2076	0.7981	0	Ent-copalyl diphosphate synthase 1, chloroplastic OS=Oryza sativa subsp. japonica GN=CPS1 PE=2 SV=1	sp|Q6ET36|CPS1_ORYSJ	3.81	2.99	3	4.35
		c25167.graph_c0	168	0.07	7.28494e-15	Ent-copalyl diphosphate synthase 2 OS=Oryza sativa subsp. japonica GN=CPS2 PE=2 SV=1	sp|Q6Z5I0|CPS2_ORYSJ	1.55	0	0	0.42
		c31296.graph_c3	291	0.1209	1.26861e-47	Ent-copalyl diphosphate synthase, chloroplastic OS=Arabidopsis thaliana GN=GA1 PE=1 SV=1	sp|Q38802|KSA_ARATH	4.52	2.7	1.53	1.93
	KS	c4631.graph_c0	378	0.1667	1.9949e-54	Ent-kaur-16-ene synthase, chloroplastic OS=Oryza sativa subsp. japonica GN=KS1 PE=1 SV=1	sp|Q0JA82|KS1_ORYSJ	0	0.51	0	0
		c25155.graph_c0	321	0.1415	3.66324e-100	Ent-kaur-16-ene synthase, chloroplastic OS=Oryza sativa subsp. japonica GN=KS1 PE=1 SV=1	sp|Q0JA82|KS1_ORYSJ	1.7	0.36	0.72	0.96
		c36769.graph_c0	2493	1	0	Ent-kaur-16-ene synthase, chloroplastic OS=Oryza sativa subsp. japonica GN=KS1 PE=1 SV=1	sp|Q0JA82|KS1_ORYSJ	36.26	31.53	32.9	36.52
Carotenoid biosynthesis	GGPPS	c30585.graph_c0	930	0.948	3.86867e-30	Heterodimeric geranylgeranyl pyrophosphate synthase small subunit, chloroplastic OS=Arabidopsis thaliana GN=GGR PE=1 SV=2	sp|Q39108|GGR_ARATH	0.33	14.41	413.08	1110.95
		c33260.graph_c0	1101	0.9866	4.9009e-140	Heterodimeric geranylgeranyl pyrophosphate synthase large subunit 1, chloroplastic OS=Arabidopsis thaliana GN=GGPPS1 PE=1 SV=2	sp|P34802|GGPP1_ARATH	6.67	215.4	489.66	679.41
		c39421.graph_c0	1023	1	9.6863e-92	Heterodimeric geranylgeranyl pyrophosphate synthase small subunit, chloroplastic OS=Arabidopsis thaliana GN=GGR PE=1 SV=2	sp|Q39108|GGR_ARATH	76.57	51.86	51.2	31.2
		c24069.graph_c1	411	0.3827	1.37677e-42	Geranylgeranyl pyrophosphate synthase, chloroplastic OS=Catharanthus roseus GN=GGPS1 PE=3 SV=1	sp|Q42698|GGPPS_CATRO	103.97	131.37	193.15	202.83
	PSY	c20256.graph_c0	1188	0.934	0	Phytoene synthase, chloroplastic OS=Narcissus pseudonarcissus GN=PSY PE=2 SV=1	sp|P53797|PSY_NARPS	4.24	1.25	0.14	0.31
		c31880.graph_c0	1272	1	0	Phytoene synthase, chloroplastic OS=Narcissus pseudonarcissus GN=PSY PE=2 SV=1	sp|P53797|PSY_NARPS	77	8.29	4.83	8.22
		c41177.graph_c0	108	0.0849	2.09765e-09	Phytoene synthase, chloroplastic OS=Narcissus pseudonarcissus GN=PSY PE=2 SV=1	sp|P53797|PSY_NARPS	0	1.33	0	0
		c28802.graph_c0	1269	0.9961	0	Phytoene synthase, chloroplastic OS=Narcissus pseudonarcissus GN=PSY PE=2 SV=1	sp|P53797|PSY_NARPS	38.67	3.85	0.74	1.1
	PDS	c39397.graph_c0	1710	0.9982	0	Phytoene dehydrogenase, chloroplastic/chromoplastic OS=Narcissus pseudonarcissus GN=PDS1 PE=1 SV=1	sp|Q40406|CRTI_NARPS	41.97	76.41	130.24	164.15
		c23252.graph_c0	435	0.2539	1.3242e-46	Phytoene dehydrogenase, chloroplastic/chromoplastic OS=Narcissus pseudonarcissus GN=PDS1 PE=1 SV=1	sp|Q40406|CRTI_NARPS	0	0	1.26	0.57
	Z-ISO	c26604.graph_c0	1098	0.9973	1.50161e-173	15-cis-zeta-carotene isomerase, chloroplastic OS=Arabidopsis thaliana GN=Z-ISO PE=1 SV=1	sp|Q9SAC0|ZCIS_ARATH	54.47	124.1	168.81	135.67
	ZDS	c33832.graph_c0	1722	0.9983	0	Zeta-carotene desaturase, chloroplastic/chromoplastic OS=Narcissus pseudonarcissus GN=ZDS1 PE=2 SV=1	sp|O49901|ZDS_NARPS	25.02	106.8	493.11	538.36
	CRTISO	c31619.graph_c0	1059	0.5731	4.26532e-55	Prolycopene isomerase, chloroplastic OS=Daucus carota GN=CRTISO PE=2 SV=1	sp|Q2VEX9|CRTSO_DAUCA	86.66	69.86	54.95	39.14
		c33278.graph_c0	1764	0.9545	0	Prolycopene isomerase, chloroplastic OS=Daucus carota GN=CRTISO PE=2 SV=1	sp|Q2VEX9|CRTSO_DAUCA	25.72	79.14	148.85	187.87
		c29983.graph_c0	768	0.9176	1.31504e-46	Beta-carotene isomerase D27, chloroplastic OS=Oryza sativa subsp. japonica GN=D27 PE=1 SV=1	sp|C7AU21|D27_ORYSJ	27.35	41.27	37.29	13.8
		c31731.graph_c0	774	0.9736	1.92369e-28	Beta-carotene isomerase D27, chloroplastic OS=Arabidopsis thaliana GN=D27 PE=1 SV=1	sp|Q7XA78|D27_ARATH	35.33	58.11	57.2	63.43
		c31086.graph_c0	771	0.9211	1.8172e-98	Beta-carotene isomerase D27, chloroplastic OS=Oryza sativa subsp. japonica GN=D27 PE=1 SV=1	sp|C7AU21|D27_ORYSJ	0.85	2.3	13.59	31.53
		c26604.graph_c0	1098	0.9946	1.50161e-173	15-cis-zeta-carotene isomerase, chloroplastic OS=Arabidopsis thaliana GN=Z-ISO PE=1 SV=1	sp|Q9SAC0|ZCIS_ARATH	54.47	124.1	168.81	135.67
	LCY-ε	c34291.graph_c0	1596	1	0	Lycopene epsilon cyclase, chloroplastic OS=Solanum lycopersicum GN=CRTL-E-1 PE=2 SV=1	sp|O65837|LCYE_SOLLC	124.33	115.53	45.33	10.73
	LCY-β	c22424.graph_c0	1512	1	0	Lycopene beta cyclase, chloroplastic/chromoplastic OS=Narcissus pseudonarcissus GN=LCY1 PE=2 SV=1	sp|Q40424|LCYB_NARPS	10.38	26.46	50.51	27.04
	CYP97A3	c34249.graph_c0	1887	1	0	Protein LUTEIN DEFICIENT 5, chloroplastic OS=Arabidopsis thaliana GN=CYP97A3 PE=1 SV=1	sp|Q93VK5|LUT5_ARATH	42.91	61.91	38.49	24.26
	CYP97C1	c13845.graph_c0	1662	1	0	Carotene epsilon-monooxygenase, chloroplastic OS=Arabidopsis thaliana GN=CYP97C1 PE=1 SV=1	sp|Q6TBX7|LUT1_ARATH	53.19	34.48	20.86	10.35
	BCH	c24102.graph_c0	909	0.9439	4.8617e-133	Beta-carotene 3-hydroxylase, chloroplastic OS=Gentiana lutea GN=BHY PE=2 SV=1	sp|B3SGL0|BCH_GENLU	19.55	241.36	931.43	1540.23
		c30123.graph_c0	933	0.9688	5.15634e-132	Beta-carotene 3-hydroxylase, chloroplastic OS=Gentiana lutea GN=BHY PE=2 SV=1	sp|B3SGL0|BCH_GENLU	20.05	29.84	6.21	0.63
	ZEP	c29571.graph_c0	1968	1	0	Zeaxanthin epoxidase, chloroplastic OS=Oryza sativa subsp. japonica GN=ZEP PE=2 SV=1	sp|Q0JCU7|ZEP_ORYSJ	22.49	21.94	28.1	49.85
		c36398.graph_c0	528	0.2659	1.42063e-08	Zeaxanthin epoxidase, chloroplastic OS=Prunus armeniaca PE=2 SV=1	sp|O81360|ABA2_PRUAR	13.47	6.82	8.09	55.33
		c37373.graph_c0	594	0.2982	4.44657e-13	Zeaxanthin epoxidase, chloroplastic OS=Nicotiana plumbaginifolia GN=ABA2 PE=1 SV=1	sp|Q40412|ABA2_NICPL	74.27	27.95	16.29	7.49
		c36057.graph_c1	339	0.1692	2.43064e-07	Zeaxanthin epoxidase, chloroplastic OS=Arabidopsis thaliana GN=ZEP PE=1 SV=1	sp|Q9FGC7|ZEP_ARATH	5.06	4.96	2.44	21.04
	VDE	c36492.graph_c3	1326	0.9228	3.14674e-12	Violaxanthin de-epoxidase, chloroplastic OS=Nicotiana tabacum GN=VDE1 PE=2 SV=1	sp|Q40593|VDE_TOBAC	9.86	4.25	3.96	3.04
		c31484.graph_c0	1416	0.9979	0	Violaxanthin de-epoxidase, chloroplastic OS=Spinacia oleracea GN=VDE1 PE=1 SV=2	sp|Q9SM43|VDE_SPIOL	19.88	12	8.22	10.59
	CCS	c35123.graph_c0	1434	0.9484	0	Capsanthin/capsorubin synthase, chromoplast OS=Citrus sinensis GN=CCS PE=3 SV=1	sp|Q9SEA0|CCS_CITSI	1.78	3.92	26.22	14.05
Carotenoid degradation(cleavage)	CCD1	c32109.graph_c0	1641	1	0	Carotenoid 9,10(9&apos;,10&apos;)-cleavage dioxygenase OS=Crocus sativus GN=CCD PE=1 SV=1	sp|Q84KG5|CCD_CROSA	118.18	152.84	142.5	190.44
		c34049.graph_c0	1347	0.8208	0	Carotenoid 9,10(9&apos;,10&apos;)-cleavage dioxygenase OS=Crocus sativus GN=CCD PE=1 SV=1	sp|Q84KG5|CCD_CROSA	6.66	2.71	2.8	3.3
		c19552.graph_c1	171	0.1078	7.40375e-11	Carotenoid 9,10(9&apos;,10&apos;)-cleavage dioxygenase 1 OS=Phaseolus vulgaris GN=CCD1 PE=1 SV=1	sp|Q94IR2|CCD1_PHAVU	3.42	1.01	1.1	0.61
	CCD4	c37669.graph_c0	1302	0.7282	0	Probable carotenoid cleavage dioxygenase 4, chloroplastic OS=Arabidopsis thaliana GN=CCD4 PE=1 SV=1	sp|O49675|CCD4_ARATH	0.11	2.64	365.64	922.04
		c34919.graph_c0	1797	1	0	Probable carotenoid cleavage dioxygenase 4, chloroplastic OS=Arabidopsis thaliana GN=CCD4 PE=1 SV=1	sp|O49675|CCD4_ARATH	12.81	113.28	165.69	271.21
	CCD7	c46794.graph_c0	180	0.1917	1.12694e-20	Carotenoid cleavage dioxygenase 7, chloroplastic OS=Arabidopsis thaliana GN=CCD7 PE=1 SV=1	sp|Q7XJM2|CCD7_ARATH	0	0.82	0	0
	CCD8	c32369.graph_c1	1419	0.83	0	Carotenoid cleavage dioxygenase 8 homolog B, chloroplastic OS=Oryza sativa subsp. japonica GN=CCD8B PE=1 SV=1	sp|Q8LIY8|CCD8B_ORYSJ	0.15	0.14	0.3	0.66
	NCED1	c33223.graph_c0	1800	0.974	0	9-cis-epoxycarotenoid dioxygenase NCED1, chloroplastic OS=Phaseolus vulgaris GN=NCED1 PE=2 SV=1	sp|Q9M6E8|NCED1_PHAVU	0.28	0	0.18	0.9
	AAO3	c20400.graph_c0	144	0.036	3.57682e-12	Abscisic-aldehyde oxidase OS=Arabidopsis thaliana GN=AAO3 PE=1 SV=1	sp|Q7G9P4|ALDO3_ARATH	1.67	1.16	0	0
	CYP707A	c32258.graph_c0	1431	0.9895	0	Abscisic acid 8&apos;-hydroxylase 1 OS=Oryza sativa subsp. japonica GN=CYP707A5 PE=2 SV=1	sp|Q05JG2|ABAH1_ORYSJ	2.23	19.73	12.99	9.54
		c8805.graph_c0	816	0.5862	8.83923e-47	Abscisic acid 8&apos;-hydroxylase 3 OS=Arabidopsis thaliana GN=CYP707A3 PE=1 SV=1	sp|Q9FH76|ABAH3_ARATH	0	0	0.98	0.81
		c25755.graph_c0	201	0.1419	1.01999e-53	Abscisic acid 8&apos;-hydroxylase 1 OS=Oryza sativa subsp. japonica GN=CYP707A5 PE=2 SV=1	sp|Q05JG2|ABAH1_ORYSJ	0	0	0	0.4
		c35999.graph_c2	228	0.161	6.88506e-32	Abscisic acid 8&apos;-hydroxylase 1 OS=Oryza sativa subsp. japonica GN=CYP707A5 PE=2 SV=1	sp|Q05JG2|ABAH1_ORYSJ	3.74	5.47	3.69	3.76
		c26362.graph_c0	711	0.5064	4.62555e-116	Abscisic acid 8&apos;-hydroxylase 1 OS=Arabidopsis thaliana GN=CYP707A1 PE=2 SV=1	sp|Q949P1|ABAH1_ARATH	0	0	0	0.7
	BG1	c40682.graph_c0	627	0.3951	0	Beta-D-glucopyranosyl abscisate beta-glucosidase OS=Arabidopsis thaliana GN=BGLU18 PE=1 SV=2	sp|Q9SE50|BGL18_ARATH	1.17	0.3	1.45	1.61
		c47911.graph_c0	438	0.276	1.8886e-103	Beta-D-glucopyranosyl abscisate beta-glucosidase OS=Arabidopsis thaliana GN=BGLU18 PE=1 SV=2	sp|Q9SE50|BGL18_ARATH	0	0.92	0.5	0.55
