# Supplementary material for: Structure of Pigment Metabolic Pathways and Their Contributions to White Tepal Color Formation of Chinese Narcissus tazetta var. chinensis cv Jinzhanyintai
Source: Int J Mol Sci. 2017 Sep 8;18(9):1923. doi: 10.3390/ijms18091923 (PMC5618572; doi:10.3390/ijms18091923)
Supplement: Supplementary file 1 [file ijms-18-01923-s001.zip › R-Table S15.xlsx]

## Sheet: STable 19
Table S19. CDS and protein sequences of chlorophyll metabolic pathway associated unigenes in tepal transcriptome of Chinese narcissus.
Pathway	Gene	Gene ID	CDS sequence	Protein sequence
ALA formation	HemA	c35985.graph_c0	ATGGCGGCCGCTGCGGCGACGACGACGAGCTTTGTGGGTGTGCGGAAGAGTTCGTTCGTGAATGCGTCGAGGTTCGGGATTGGGGCTCCGAAGCCTAGATTAGAGTTTCGGGTGCGGAGAAGCCCTAGATGCGAGATTGGTACGGATCTTGAAGAGAAGGCGAAATCCAGGGCTTCTAGCATCTCCGCGTTGGAGCTCTTCAAAGTCTCCGGCACAGATCGGTACATGAAGGAAAGGAGTAGCATTGCTGTTATTGGTCTTAGTATCCATACGGCACCCGTAGAGATGCGTGAAAAGCTTGCCGTTCCTGAAGCACAATGGCCCCGCGCCATTGGGGAACTTATCAACTTAAATCATATAGAAGAAGCTGCTGTTCTGAGCACCTGTAACAGAATGGAG…	MAAAAATTTSFVGVRKSSFVNASRFGIGAPKPRLEFRVRRSPRCEIGTDLEEKAKSRASSISALELFKVSGTDRYMKERSSIAVIGLSIHTAPVEMREKLAVPEAQWPRAIGELINLNHIEEAAVLSTCNRMEIYVVALSWHRGIREVIEWMSKTSGIPVPELREHLFMLRDCDATRHLFEVSAGLDSLVLGEGQILAQVKQVVRVGQGSGGLGKNIDRLFKDAITAGKRVRSETNISSGAVSVSSAAVELALMKLPKPHALSARMLVIGAGKMGKLVIKHLASKGCRKIVVVNRSTEKVDAIREELKEVEIIYKPLDEMLSSAAEADVIFTSTASETPLFFKENVESLPPVGEDVGGVRFFVDISVPRNVGSCVSELKLARIYNVDDLKEVVEANKED…
		c30156.graph_c1	ATGGCGGCAGCGTCGGCGAGCGGGCTAGCGACGCCGTTTAAAGTGGAATTATTGGCGCGCAAAGGAAGTCCGTTGAATGCTGGTAAGCTAGGGTTCGGGGCACAGCCAAGATTGGGGTGTCGGGTGAAGAGGAGCCCTAGGTGCGAGATTGGGGCGGATCTCGAAGAGAAGATGGCCTCCAGGGCTTCTAGCGTGTCAGCGTTGGAGCAGTTCAAAGTCGCCGGAACGGATCGGTACATGAAGGAAAGACGCAGCATTGCCGTTATTGGTCTTAGTGTTCATACATCACCAGTAGAGATGCGTGAAAAGCTTGCCATTCCGGAGGCGCAATGGCCTCGAGCCATCGACGAGCTCTGCAACTTAAATCACATAGAAGAAGCTGCTGTTCTCAGTACATGC…	MAAASASGLATPFKVELLARKGSPLNAGKLGFGAQPRLGCRVKRSPRCEIGADLEEKMASRASSVSALEQFKVAGTDRYMKERRSIAVIGLSVHTSPVEMREKLAIPEAQWPRAIDELCNLNHIEEAAVLSTCNRMEVYVVALSWHRGIREVTHWMAKHRIGIAIIFQRRCRIARVYNVDDLKEVVEANREERLREAVEARAIIGQESKRFDAWRDSLETVPTIKKLRSYADRIK
		c41874.graph_c0	ATGGCCAAGAGCAGTGGAATCCCCGTTTCAGAGCTCCGCTTACATCTATTCATGCTTCGGGACAGTGATGCCACTAGACATCTTTTTGAAGTGTCGGCAGGACTCGACTCTCTTGTCCTAGGAGAAGGCCAGATCCTCGCCCAGGTCAAACAAGTCGTTAGAGCTGGGCAAGCGAGTGGTGGTCTAGGGAAGAGCATCGACAGGCTGTTCAAGGATGCAATCACGGCCGGGAAGCGGGTCCGCAGCGAAACCAACATCTCCTCCGGCGCGGTCTCCGTCAGCTCGGCCGCAGTCGAGTTGGCTCTGATGAAGCTCCCCAAACCCCACTCAATATCCGCCAGAATGCTCGTAATTGGAGCTGGCAAGATGGGAAGGCTCGTCATCAGGCATTTAGCCTCT…	MAKSSGIPVSELRLHLFMLRDSDATRHLFEVSAGLDSLVLGEGQILAQVKQVVRAGQASGGLGKSIDRLFKDAITAGKRVRSETNISSGAVSVSSAAVELALMKLPKPHSISARMLVIGAGKMGRLVIRHLASKGCRKIVVVNRSTAKVDAIREELKDVEIICRPLNELLSSAAEADVIFTSTASESP
	HemL	c37283.graph_c0	ATGATGGCTGTTGGTATTGGGCTCTCGTGGAGCTCAAATCTCTCTCTAAAACTCCCACTAATATCAAACAAACCCTCCTCTTCCAATCGCAGAACTTCAAATTTTGCCGTGAAGAATGCAATCTCTATTGAAGAGAAAACGGGGTCTTCTTTGTCTCTTCAGAAGTCTGAAGAAATCTTCAATGCTGCCAAGGAATTGATGCCTGGAGGTGTAAATTCGCCGGTTCGTGCCTTTAAATCAGTTGGTGGACAGCCCATTATTTTTGACTCTGTCAAGGGCTCCCGCATGTGGGATGTTGATGGTAACCAATATATTGACTATGTAGGTTCGTGGGGTCCAGCAATAATTGGTCATGCAGATGATAAGGTCAACGCTGCCTTGATTGAGACGTTGAAGAAA…	MMAVGIGLSWSSNLSLKLPLISNKPSSSNRRTSNFAVKNAISIEEKTGSSLSLQKSEEIFNAAKELMPGGVNSPVRAFKSVGGQPIIFDSVKGSRMWDVDGNQYIDYVGSWGPAIIGHADDKVNAALIETLKKGTSFGAPCVLENVLAEMVISAVPSIEMVRFVNSGTEACMGALRLARAFTSRQKLLKFEGCYHGHADSFLVKAGSGVATLGLPDSPGVPKAATSDTLTAPYNDIEAVKALFDTHKGEIAAVILEPVVGNAGFIVPKPEFISALRQITEEDGSLLIFDEVMTGFRLSYGGAQEYFGIAPDLTTLGKIIGGGLPVGAYGGRKDIMQMVAPAGPVYQAGTLSGNPLAMTAGIHTLKRLQEPGTYDYLDKITGQLVHGILDAGKVFGHEMC…
		c25411.graph_c0	ATGGTCAGATTTGTCAACTCTGGCACTGAAGCATGCATGGGAGCACTCCGCCTCGCACGGGCCTTTACCAGTCGCCAGAAGCTCCTCAAATTCGAAGGCTGCTACCATGGTCACGCCAACTCCTTCCTTGTCAAGGCCGGCAGTGGTGTTGCCACCCTTGGTCTTCCCGATTCCCCAGGTGTTCCCAGAGCTGCCACGTCGGATACCTTAACTGCGCCTTACAACGACATCGAAGCTGTGAAAACTCTTTTTGGCACCCACAGGGGCGAGATCGCTGCTGTGATACTTGAACCCGTAGTTGGAAACGCAGGCTTCATTGTGCCAAAGCCCGAATTCATATCAGCCCTCCGTCAGATCACAAAGGAAGATGGTGCCCTTTTGATATTTGATGAGGTGATG…	MVRFVNSGTEACMGALRLARAFTSRQKLLKFEGCYHGHANSFLVKAGSGVATLGLPDSPGVPRAATSDTLTAPYNDIEAVKTLFGTHRGEIAAVILEPVVGNAGFIVPKPEFISALRQITKEDGALLIFDEVMTGFRL
Proto IX formation	HemB	c31368.graph_c0	ATGGCTTTGACAATGTCATTGACTTCTAGTAATGTTCAAGTACTTAGACCTAAAGATATTCAAAGTTGTACTGGCTTAAGGCCGAGACTGGCACGGAGATCTTCTGGTTCCATGCCAGCTACAAAAATACAACCTGCGAAGGTCGTTAGAGCGAGCAATGATCAGGAGATATCCGTTAAAAGCTCAGGTTTCAGTAATGAGGAGTATGAGGCCATTGCTGTTGCTGGGAATTTCCCTGAACCCCCACCACTTTATAGACCACCTGGTCCAAAAGGAACTCCAGATGTCAAACCACTACAAATTATTAGGCGCCCACGTCGAAACAGGAAGTCTCCTGCATTGAGGGCCTCTTTCCAAGAAACATATATCACACCTTCAAATCTTGTACTTCCTCTATTT…	MALTMSLTSSNVQVLRPKDIQSCTGLRPRLARRSSGSMPATKIQPAKVVRASNDQEISVKSSGFSNEEYEAIAVAGNFPEPPPLYRPPGPKGTPDVKPLQIIRRPRRNRKSPALRASFQETYITPSNLVLPLFIHEGEVDTPIGAMPGCFRLGWRHGLLDEVYKARDVGVNSFVLFPKIPDALKTPTGDEAYNDNGLVPRTIRLLKDKYPDTVIYTDVALDPYSSDGHDGIVREDGVIMNDETVYQLCKQAVSQARAGADVVSPSDMMDGRIGAIRVALDAEGFQDVSIMSYTAKYASSFYGPFREALDSNPRFGDKKTYQMNPANYREALIETEGDEAEGADILLVKPAMPYLDVVRLLRDNSSLPIAAYQVSGEYSMIKAGGALKMIDEEKVMMESL…
	HemC	c36032.graph_c0	ATGGCAAATCCAATTATCACCATGAGGTCCGCAACCCTTCACCCTCCAGTGACTGCCACGTCAGCTCCTCGCTTCCCTTCTCCATCTCCTTCGAGTAAACAATCGAAGAGGAGGGCCATGACCATTAAAGCGGCACTAGCCGTGAAGCAAGAGGAGAAGACAAAGGTCTCCCTTATGAGAATTGGCACAAGGGGAAGTCCCTTAGCTCTTGCACAAGCCCATGAAACACGAAACAAACTCGTGGCAACACATTCAGAGCTAGCCGAAGAAGGAGCTATCGAAATCATAATAATAAAAACTACTGGTGATAAAATACTCAACCAACCACTAGCCGACATAGGAGGTAAAGGATTATTTACGAAAGAGATAGATGAGGCTCTCTTGGATGGTAGAATTGAT…	MANPIITMRSATLHPPVTATSAPRFPSPSPSSKQSKRRAMTIKAALAVKQEEKTKVSLMRIGTRGSPLALAQAHETRNKLVATHSELAEEGAIEIIIIKTTGDKILNQPLADIGGKGLFTKEIDEALLDGRIDIAVHSMKDVPTYFPDGMILPCNLPREDVRDAFISLTAKSLAELPAGSIVGSASLRRQSQILYKYPTLKVVNFRGNVQTRLKKLNEGEVQATLLALAGLKRLNMTETVTDILSIEEMLPAIAQGAIGIACRSNDDKMADYIASLNHEETRLAVACERAFLETLDGSCRTPIAGYAHKNADGYCIFRGLVASPDGTRVLETSRKGLYAHDDMISMGKDAGKELISRAGPGFFDW
		c14365.graph_c0	ATGGCAAATCCAATTATCACCATGTTATCCACAACCCACCACCCGCCAATGGCCACCATGTCAGATCCTTGCTTCTCATCTTCTTCTTCGTCGTCCAGGAAACAGTTAAGGAAGAGAACCATGGGCATTAAAGCAGCTCTAGCCATGGAGCAGGAGGAGAAGACCAAGGTCTCCCTTTTGAGAATTGGCACCAGGGGAAGTCCATTAGCTCTTGCCCAAGCCCATGAAACACGAAACAAA	MANPIITMLSTTHHPPMATMSDPCFSSSSSSSRKQLRKRTMGIKAALAMEQEEKTKVSLLRIGTRGSPLALAQAHETRNK
	HemD	c31392.graph_c0	ATGGCTTCTCTCTCTTCCCTTTACCCACATCTTCGTTCTCCAATCAATAATAAAAAATTCCAGCTTCGAGCTTCCTCTTTTCCTTCTCCTTCGTCAATCAAACCTAAAGTTGTCGTCACCAGAGAACAAGGGAAGAACGCCAAGCTCATCCATGAATTGGAAAAACATAACATTCACTGCTTGGAAGTCCCTCTTCTTAGGCACACAGAAGGGCCTGACTTGAATAGACTTTCAGAACTATTGCGTGAAACTGTTTTTGATTGGGTTGTCATAACTTCCCCTGAAGCTGGTGCTGTGTTCCTTGAAGCATGGAAGGCTGCTGGAACTCCTAAAGTCCGAATAGGAGTAGTTGGAGCTGGCACAGCAAGTGTTTTCCAAGAAGTTTTACAGTTTCCGGGT…	MASLSSLYPHLRSPINNKKFQLRASSFPSPSSIKPKVVVTREQGKNAKLIHELEKHNIHCLEVPLLRHTEGPDLNRLSELLRETVFDWVVITSPEAGAVFLEAWKAAGTPKVRIGVVGAGTASVFQEVLQFPGQSLEVAFSPSKAIGKALAAELPKYGQKSCQVLYPASVKASNDIEEGLSGRGFEVTRLNTYNTVAVKYVDEVVIQQALSVPVITAASPTAIRAWVNLIPKSGNWDKSVACIGETTASAAKRLGLKNVYYPTNPGLEGWVDSILEALRIHDQRQKVC
	HemE	c37636.graph_c0	ATGAATACGATGGCAACTCCCATGGGCAGCAGTATCAGTGCTATTTTTACGGGGCAGAGACCATTTCGCGAGCTTGGGAGGAACGAGGGCGGCGTGCGTCCTCCTCTTCCATCTATTAGGACGAGGGTATCCCCAAGGGCCATGTCCTCCTCTTCTGATCCAATTTTAGTTCAGGCTGCCAGAGGAGATCCCGTTAGTCGTCCCCCCGCATGGATGATGCGCCAGGCAGGAAGGTACATGGCTGTTTACCAAAAGCTTGCTGAGAAATACCCGTCCTTCAGGGAGAGGTCGGAGACGATCGATCTTATCGTGGAAATTTCTTTGCAGCCTTGGAGAGCTTTCCGTCCAGATGGAGTAATCATTTTCTCGGACATACTCACTCCCCTACCTGCATTCGGT…	MNTMATPMGSSISAIFTGQRPFRELGRNEGGVRPPLPSIRTRVSPRAMSSSSDPILVQAARGDPVSRPPAWMMRQAGRYMAVYQKLAEKYPSFRERSETIDLIVEISLQPWRAFRPDGVIIFSDILTPLPAFGVPFEIEEVRGPIIPSPIRDEEGLKKLHPIDLNKLHFVGESLRILRREVGEKAAVLGFVGAPWTIATYIVEGGTTRTYTTIKRMCYTAPDVLKALLSHLTQAISDYIIFQVNSGAQCIQIFDSWGGQLPPNVWELWSKPYIEEIVRIVRKACPQTPLVLYINGNGGLLERMKGVGVDVIGLDWTVDMADGRKRLGSGVGVQGNVDPAYLFSPLPVLTDEIHRVVRSAGPRGHILNLGHGVLVGTPEEAVAHFFDVARGLSYDTLFED…
		c21380.graph_c0	ATGTCTGGTATTTGTAGCTCTCTTTCTCCATCTTCATCAAAGAATTTTCCAATAAATCGAATTTTGAATTCTCGTTCCAATAACGCCGCGACCCCCCACAAAGTTCGCTGCACTGTTGGAGAAATTGTCGCTGAACCAATAGCCACGGGTGTTGGGGAGCCTCTCTTACTTGATGCTGTTAGAGGGAAAAAAGTGGAAAGGCCTCCAGTTTGGCTTATGAGGCAAGCTGGGAGGTACATGAAGAGCTATCAACTGATATGTGAGAAATATCCTTCTTTTCGCAAAAGATCAGAAAATGTGGATCTTGTCGTTGAAATCTCTCTACAGCCATGGAAAGTTTTCAAACCTGATGGGGTTATATTGTTTTCTGACATTCTTACACCTCTTCCTGGGATGAAT…	MSGICSSLSPSSSKNFPINRILNSRSNNAATPHKVRCTVGEIVAEPIATGVGEPLLLDAVRGKKVERPPVWLMRQAGRYMKSYQLICEKYPSFRKRSENVDLVVEISLQPWKVFKPDGVILFSDILTPLPGMNIPFDIVKGKGPVIYSPLRTAADVDRVTNFNPMESVPYVGEALTILREEVKNEAAVLGFVGAPFTLASYVVEGGSSKHFSKIKNMAFSQPKVLHALLQKFATSMAEYIKFQADNGAQAVQIFDSWATELSPADFEEFSLPYLKQIVDSVKITHPNLPLILYASGSGGLIERLPLTGVDVISLDWTVDMEEGRGRLGWNVAVQGNVDPGVLFGSKDFITKRIYDTVKKAGNSKHILNLGHGIVVGTPEENVAHFFEVAKGIKY
	HemF	c64052.graph_c0	ATGTCTTTGAGAAAGCTGGTGTTAATGTCTCTGTGGTTTATGGTGTTATGCCTCCTGAAGCTTATAGAGCTGGAAAGGGCTCAGCTTCTGATCAGAAACCTGGTCCTGTTCCGTTCTTCGCTGCTGGAGTCAGCTCGGTTTTGCATCCCAAGAACCCTTTTGCCCCAACCCTGCATTTCAATTATCGCTATTTCGAGACAGATGCTCCAAAGGATGTTCCTGGAGCTCCAAGGC	MSLRKLVLMSLWFMVLCLLKLIELERAQLLIRNLVLFRSSLLESARFCIPRTLLPQPCISIIAISRQMLQRMFLELQG
		c31690.graph_c0	ATGCAATCGTCGATCTCCTTCCCCAATACCGTAACCCTACCCCCCTCATTTGCCCCCAAATCCAAAACCCAAACTCTAGCCCTCCGCCACCTCTCACTCAACCGCCGCCACCGACGGCCTCTCCGCCTCATCTCTGTCCGCGCCACCGTCGCCATCGAGAAGGAGACCCCCGAGAACGAACGGCCTGAAACCTTCCTCAGAGAATCTGACGAGGCCCAGACCCTAGTCCGAGCTCGATTTGAGAACATGATAAGGGAGACCCAAGATGAGGTTTGCGCTGCCATCGAAGCAGCCGACGGGGTCGGGAAGTTCAAGGAGGACGTGTGGTCGAGGGCCGGTGGGGGTGGCGGGATCAGTAGGGTTTTGCAGGAGGGTGGGGTTTGGGAGAAGGCAGGGGTG…	MQSSISFPNTVTLPPSFAPKSKTQTLALRHLSLNRRHRRPLRLISVRATVAIEKETPENERPETFLRESDEAQTLVRARFENMIRETQDEVCAAIEAADGVGKFKEDVWSRAGGGGGISRVLQEGGVWEKAGVNVSVVYGMMPPEAYRAARGEVESNGNKAGPVPFFAAGISSVLHPNNPFAPTLHFNYRYFETDAPKDTPGAPRQWWFGGGTDLTPAYIFEEDVKHFHKVQKQACDEFDPSFYPRFKKWCDDYFFIKHRGERRGLGGIFFDDLNDYDQEMLLAFSTKCSKSVVPAYLPIVERRKDTPFNDHHKAWQQLRRGRYVEFNLVYDRGTTFGLKTGGRIESILVSLPLTARWEYDHHPEEGSEEWKLLDACINPKEWI
	HemN	c20109.graph_c0	ATGTTGAGATCAGCCTTGTTCCTACCTCTCACCCTCCATCATAATCCCAAGCCCAAACTCAAATTCAAACTCCCTCCCACAATGGCAGTGTCATTCTCCACCGCAGCCACAACAACCACTGCTCCTCAATGCCCACCACCTGTTTGTCAAAATTCCCCACCCACCTCTGCCTACATCCACCTCCCCTTCTGCCGTCACCGTTGCTACTACTGCGATTTCCCCATCATCGCCCTCGGCTCCTCCTCTTCCCAAACTACTTCCAACCCTTTAATCTCGAACTACATCCACCTCCTCCTCCGCGAAATCCAATCCACCCCAACAATTCCCAATTCCGCCCACCCGCCTCTCAAGACCATCTTTTTTGGAGGTGGGACCCCCTCCCTCGTCCCCCCGAGCCTC…	MLRSALFLPLTLHHNPKPKLKFKLPPTMAVSFSTAATTTTAPQCPPPVCQNSPPTSAYIHLPFCRHRCYYCDFPIIALGSSSSQTTSNPLISNYIHLLLREIQSTPTIPNSAHPPLKTIFFGGGTPSLVPPSLVYSILSLLQSKFGIDPSAEISIEMDPGTFDRKKFEEIVGLGVNRVSLGVQAFQEDLLRVCGRAHGLREVEEAVEIVGGHGGVENWSLDLISSLPRQREDMWRESLRRAVEAGPKHVSVYDLQVEQGTKFGQLYTPGEFPLPTETQSADLYKIASETLAKAGYNHYEISSYSKPGYECKHNLTYWHNKPFYGFGLGSASYVNGTRFSRPRRLKEYTNYVINLEEGKIDDLSSSNAEARDVAMDIVMLSLRTAKGLDVESFAKSFGES…
	HemY	c32739.graph_c1	ATGGCCGCCGCCGCCGCCATTTCTACCTTCTCGATCCCGACAAGATCTCGATCGATCGTCCACCGCTGCTCCCTCGCTGCCGGAGGTGCCGCCGTTGACTGGGAGCCACCGGTCAGCGCCAGGGTAACCGCCGACTGCGTTGTGGTAGGCGGTGGGATCAGCGGCCTCTGTACCGCCCAGGCCCTCGCCGCTCGCCACTCGGCAGGTGAGGTACTCGTGACGGAGGCGAGGGATCGGGTGGGCGGTAACATCACCACCGTCGAAAGGGACGGATTCCTTTGGGAGGAGGGGCCGAATAGCTTCCAGCCCTCGGATCCGGTCCTCACCCTGGCGGTTGATAGTGGTTTGAAGGATGATCTCGTGTTCGGCGATCCCAATGCACCACGCTTTGTTCTTTGG…	MAAAAAISTFSIPTRSRSIVHRCSLAAGGAAVDWEPPVSARVTADCVVVGGGISGLCTAQALAARHSAGEVLVTEARDRVGGNITTVERDGFLWEEGPNSFQPSDPVLTLAVDSGLKDDLVFGDPNAPRFVLWNGKLRPVPSKPTDLPFFDLMSIGGKLRAGFGAIGIRRPPPGHEESVEEFVRRNLGDEVFERLIEPFCSGVYAGDPAKLSMKAAFGRVWKLEQNGGSIIGGTFKAIQDRNKSPKLPRDLRLPKPKGQTVASFRKGLSMLPNAISSRLGSKVKLSWKLTSIKKMDGFGYTLMYETPEGNVSVQARSVVLTIPSYIASSLLRPLSNDAADALLKFYYP
		c36699.graph_c0	ATGCGCCACGCATTTCCAGAGTTGTGGAATCTAGAAAAGAAGTTTGGTTCAATAATTATTGGGGCTATCCGGTCTAAAGCATCTGGGAAACCAAAAAATGGCATGGCAGGGAAAACCCCAAATTCTTCAGAAACGAAGCAGCGTCAACGAGGTTCATTTTCATTTCAAGGTGGAATGCAGACACTTACAAACATGCTGTGTACGAAGCTTGGTAATGATAGTATTAAACTAGACTCGAAGGTGCTGTCATTGTCCTATGACCCTGACAGAAGTTCTCCCTTTCAAAGTTGGTCCATTTCTTATGCTGCAAATAGTGGGAATCAATCAAAGCTGGATCAAACTTTTGACGCAATCATAATGACGGCTCCACTTGGTAACGTCCAAGAGATGACATTTACG…	MRHAFPELWNLEKKFGSIIIGAIRSKASGKPKNGMAGKTPNSSETKQRQRGSFSFQGGMQTLTNMLCTKLGNDSIKLDSKVLSLSYDPDRSSPFQSWSISYAANSGNQSKLDQTFDAIIMTAPLGNVQEMTFTKRNPFMLDFFPKVDCPPLSVMVTSFKKESVKRPLEGFGVLVPSKEVENGLHTLGTLFSSMMFPDRAPIDQYLYTTFIGGTRNTELASAPLDKLKAVVTSDLRKLLGAEGQPTFVKHIYWRNAFPLYGHDYDLVLEAIKKMERDLPGFFYAGNHRDGLSVGKSITSGLRAAELAISYLDSEMKKDA
Heme formation	HemH	c34624.graph_c0	ATGACGACAATTCGACCACATCCGTTCCAATTTGAGCTGCCGATCGCAAAATTGAAATCGAATAAGTCCATCTCCTCTGACAAATCTCATGGCAATCACATCCAGATGTTTATTCCAAGACCACCATGTACAACTCAGGTGCTTAACCAGTTATATGGATCTCAAATGGAATCTTGGAGTGGATCATCGCAGAGAATGAGACCCTTATTTGCCGGCAATCACCCACGGTGGCATGATCTATGGTCATCTGGTCACAGATGGCCATTCGAGAGGCATTCGTCAACTTCGGAGGTAGCCATGTCCTCTAAGAGTAAAGATGTGTTGAGCACACTTCTTAGTGGTAACGACAAGGTCGGGGTCTTGCTTCTCAATCTTGGAGGTCCGGAAACCCTTGACGAC…	MTTIRPHPFQFELPIAKLKSNKSISSDKSHGNHIQMFIPRPPCTTQVLNQLYGSQMESWSGSSQRMRPLFAGNHPRWHDLWSSGHRWPFERHSSTSEVAMSSKSKDVLSTLLSGNDKVGVLLLNLGGPETLDDVQPFLFNLFADPDIIRLPRMFRFLQKPLAQFISVARAPKSKEGYASIGGGSPLRQITDAQAEELRKALCEKNVPAKVYVGMRYWHPFTEEAIEEIKLDGITKLVVLPLYPQFSISTSGSSLRLLESIFREDEYLVNMQHTVIPSWYQRDGYIKAMTSLIEQELRKFGFPEEVMIFFSAHGVPLAYVEEAGDPYKAEMEECVDLIMEELDKRGLSNAYILAYQSRVGPVEWLRPYTDETIVELGQKGVKSLLAVPISFVSEHIETLE…
		c23926.graph_c0	ATGACTCGGACGTGGATCCGCTACAGTATGCAGTCAAATTGTTATTCGGCTCAGTCCTGGCTTTTTTCTTGCTTTTTACACCAAAGTTATTCTCAGTATTTTGGAATCATGTCTTATGATCATCGTTTA	MTRTWIRYSMQSNCYSAQSWLFSCFLHQSYSQYFGIMSYDHRL
		c36969.graph_c0	ATGGAAGCCCTAGGAGTGGCGGTTCCCCAAGCTAGGTTCTCTGGTCTTTCTCATCAGCGAGTTAAACAAAGGTCTTATCACATGAGCGAGGTTTCACATAATAGTTCTATATCTGCAGCTCTCAGTTCACACAGAGCACTACAACTCTTCAGTAAATCATTGGAACTATTGCCACTTTCTCATCACTCCTCCTTAAATAGAAGTGGAAATTTGATCAAATCATCTATAAACATACCAGATAAAGATAGGAAAATTGTGGGGAAAACATTTTATTCAACTGAAGCATACACTTTTGGTGAGAATATCATTGGAAGTTCTTCAACTACTGCAGAAGAAAAAGTTGGTGTGCTGCTATTGAACCTTGGAGGCCCAGATACCCTTCAGGATGTGCAGCCATTT…	MEALGVAVPQARFSGLSHQRVKQRSYHMSEVSHNSSISAALSSHRALQLFSKSLELLPLSHHSSLNRSGNLIKSSINIPDKDRKIVGKTFYSTEAYTFGENIIGSSSTTAEEKVGVLLLNLGGPDTLQDVQPFLFNLFADPDIIRLPRLFQFLQRPLAKLISVVRASKSKEGYAAIGGGSPLRKITYEQAHALKLALENKKLHANVYIGMRYWHPFTEEAIQQIKRDKITKLVVLPLYPQYSISTSGSSIRLLQTIFREDAYFEGLPISIIESWYQREGYIKSMADLIEKELLSFSKSEEVMIFFSAHGVPVSYVEDAGDPYRDQMEDCISLVMNELKYRGITNQHTLAYQSRVGPVQWLKPYTDEVLVELGQKGVKSLLAVPISFVSEHIETLEEIDM…
		c32498.graph_c0	ATGCTGGGTGCTGCTGCTGCTGCCCCTTTCTTCCATGTTCTGCCCACCAGCAGGGAAGTTGTAAACAATCCTCGTAGATTATTTCACCCGGACTTTGTGAAGTTGCCAAAACCTATGACAAAAAGAAACGCAAGTTTTCGGATCGAATCTGGTATGAGCATCAGAAACGAGAGGGGGCGTGAGGGAGAGGAACATCTGAGTACGTTGGGAGACAAAGATGCGGTTATAATCGTGGACCATGGCTCTCGGCGTAAAGAATCCAATCTCATGCTAAATGAATTTGTTGCAATGTTTAAAGGTCGAACTGGTTACAGCATAGTGGAGCCCGCTCATATGGAATTGGCTGAGCCATCAATCAAAAATGCATTCAATCAGTGCGTTCAGCAAGGTGCCAATCGG…	MLGAAAAAPFFHVLPTSREVVNNPRRLFHPDFVKLPKPMTKRNASFRIESGMSIRNERGREGEEHLSTLGDKDAVIIVDHGSRRKESNLMLNEFVAMFKGRTGYSIVEPAHMELAEPSIKNAFNQCVQQGANRIIVSPFFLFPGRHWHQDIPSLAAEAAREHSGISYIITAPLGLHELMVDVMDDRIKQCLSHVAGEADECSICAGTGRCHFYGLT
	COX10	c28536.graph_c0	ATGTGGAGATGCAACGCTGTTGTGAGAAGCATCTCAACGAAGCTCCTCCCTCAGCCTCTACCAAACCCTAACCATAAATCCCTTTTACCTATCGAGACAAGTCTCGGGCTCCTCTTCACCTCGGAGATCCACTCCCCTTCGCACCAATGGAAGCTAGCTAGAAAAGAGGCGGCCGTGGGATACTCCGCCATCTCTCCCGCTGAGGCCTCGCCGGTGGTGATCGGATCTCTTGGCTCGGCAGCGGGTAAGGTCAGGGAGCTATCGGATTCGCTTAGATTTTATGGGAGATGTTATTGGGAGCTTTCCAAAGCTAGACTCAGCATGCTTGTGGTTGCAACTTCTGGAGCAGGATTTGTTCTTGGCAGCGGCCCTGGTATAGATTTTGGCAGGCTTTGTTGT…	MWRCNAVVRSISTKLLPQPLPNPNHKSLLPIETSLGLLFTSEIHSPSHQWKLARKEAAVGYSAISPAEASPVVIGSLGSAAGKVRELSDSLRFYGRCYWELSKARLSMLVVATSGAGFVLGSGPGIDFGRLCCTCAGTMMVAAAANSLNQVFEVHNDAKMKRTAKRPLPSGRLSVSHAAVWASTVGIAGTSLLAWQTNYLAAGLAACNLGLYAFVYTPLKQIHPVNTWVGAIVGAIPPLLGWVAACGEVSLNAMILPAALYFWQLPHFMALAYLCRNDYIAGGFRMLSFSDASGWRTALVSFRNCLYLLPLGFLAYDWGMTTKWFTLESSLVTLCMTAAALSFVHDRTAKSARRMFRASLLYLPVFMAGLLLHRLPNEQQESMSTNVTADEEELLVSDG…
	COX15	c33455.graph_c0	ATGTCGAGCACCAGATTGGGAAGGCTGCTCCTTCGGAGAAGCAAAACCCTAAACCTAATTTCTTCTCACTTCAAAAGTCTTTCTTCTTCCTCTTCATCTTTTGCTAGGGCTTCAAATGAACAGCAATCCCTTCTTTCTTCCTTCAAATTACCATCACCGTGCCGATGTTGGGCACCGCCTCTTTCTAGATACGGATCGCTGTACGGTTTCAAATCGATTCCCAAGCCTTTACTGGGTCCACCCTCAAGGAAAATGACCACTTCTGCAGCTCTCTTAAGTTCAACCAAATCAGAAGTTGCAAGTTCAGGACTAAAGATACTTGTTGCTGGAGGACCCCATGCTCAGAAAGTGGTTGGAATATGGCTTTTTGGCTGTGCTGCTTGGGTTTTTAGTCTGGTG…	MSSTRLGRLLLRRSKTLNLISSHFKSLSSSSSSFARASNEQQSLLSSFKLPSPCRCWAPPLSRYGSLYGFKSIPKPLLGPPSRKMTTSAALLSSTKSEVASSGLKILVAGGPHAQKVVGIWLFGCAAWVFSLVVLGGVTRLTRSGLSMTDWKFTGSLPPLTEDEWLLEFEKYQQSPEYERVNKGMKLADFKFIYWMEYAHRMWGRGLGVIFALPFAYFLAKGYITRQLGLRLSALFALGGGQGLIGWWMVKSGLEEPSSEYVQPRVSPYRLATHLTSAFVIYSGILWTALSVVMPEPPNGSSGWVNGAAKVRKMVLPLSLLVGITALSGAFVAGNDAGRAYNTFPKMGDTWVPNDIFSMEPLICNFFENTSTVQLNHRILATATLVSVGSFWLASRRIE…
		c22878.graph_c1	ATGAGACCAAAGCATTTCTCTGAGTTGATGATTCCTTTCAAGTTTGAAATCCTTCAGATATTGCTTTTAAGAGAGACTGTTCTTAAAAGAATTCAAACTTCTGACCTCAATAAA	MRPKHFSELMIPFKFEILQILLLRETVLKRIQTSDLNK
Chlorophyll formation	ChlH	c38753.graph_c0	ATGGCATCTCTAGTGTCAACTCCATTCACTCTACCCACTTCAAAATTAGAGCTTCTCTCCTCTCTGTCACAAAGGCAAACCTTTCTTCACTCTTTCTTGCCCCAGAAAGCGTCAAGAAACGTCTTGAGACTTCGATGCAACGCCGCCATTGGCGGCGTCGGCGGCGGTGGCATGTTCACTCAGACGAAGCCCGAGGTGCGCCGCATAATACCAGACAACACGAAAGGCCTTCCAAGAGTAAAGATTGTGTATGTCGTCCTCGAAGCTCAATACCAATCTTCCCTCTCTGCGGCCGTGCAAACTCTCAATAACAAACAGCAATATGCCTCGTTTGAGGTCGTGGGCTATCTGGTCGAGGAGCTTCGCGATGAAAGCACGTACAAGACCTTCTGTGAGGAT…	MASLVSTPFTLPTSKLELLSSLSQRQTFLHSFLPQKASRNVLRLRCNAAIGGVGGGGMFTQTKPEVRRIIPDNTKGLPRVKIVYVVLEAQYQSSLSAAVQTLNNKQQYASFEVVGYLVEELRDESTYKTFCEDLVDADIFIGSLIFVEELALKVKAAVEKERDRMDAVLVFPSMPEVMRLNKLGSFSMAQLGQSKSPFFQLFKKKKSSAGFADSMLKLVRTLPKVLKYLPSDKAQDARLYILSLQFWLGGSPENLENFVKMISGAYVPELQGTKIPYTDPILFLDTGIWHPLAPCMYDDVKEYLNWYETRRDANQKIKSPDAPVIGLVLQRSHIVTGDEGHYVAVIMELEARGAKVIPIFSGGLDFSGPVERYLINPINNKPFVNAVVSLTGFALVGGP…
		c55025.graph_c0	ATGCTGAACCGTCTCATGAACACCAATCCCAACTCCTTCAGGAAAATGCTTCAGACTTTCTTGGAGGCCAATGGTCGTGGCTACTGGGACACTTCCGCTGAAAACATAGAGAAGCTCAAGGAATTGTACTCGCGGGTGGAAGACAAGATCGAAGGGATCGATCGA	MLNRLMNTNPNSFRKMLQTFLEANGRGYWDTSAENIEKLKELYSRVEDKIEGIDR
	ChlD	c35182.graph_c0	ATGGCGACTCTTTCTCTGTCACTCCCACTAAGAAGTGCCCACTCCTCTTCTCTTGTCCCTTCTCTCAAACCAAGCCCTAACCTTAACCCTACTTTATCCTCCTCTTCTTCAAAGAATCGCCATCGCAGATGTGCCCGTAGAGCTTCGATTCGCGCGGTAGCTGCGGAGCCTGCAACAATTGAGTCCTCTAATGGCGCCTTCACCAAACAAACTCAGAAGAAACCCGACGAGAGTTCGAATTATGGTCGGAAGTTCTTTCCCTTGGCCGCGGTTGTTGGCCAGGATGCAATCAAAACAGCTTTACTTCTTGGTGCTATTGATCGAGAGATAGGAGGGATTGCAATCTCTGGTAAGCGGGGAACAGCAAAGACGGTAATGGCACGTGGGCTGCATGCTATC…	MATLSLSLPLRSAHSSSLVPSLKPSPNLNPTLSSSSSKNRHRRCARRASIRAVAAEPATIESSNGAFTKQTQKKPDESSNYGRKFFPLAAVVGQDAIKTALLLGAIDREIGGIAISGKRGTAKTVMARGLHAILPPIEVVAGSIANADPSCPEEWEEGLAEKGEYDAHGNVKTEIVKSPFVQIPLGITEDRLIGSVDVEESIKSGTTVFQPGLLAEAHRGVLYVDEINLLDEGISNLLLNVLTEGINTVEREGISFRHPCKPLMIATYNPEEGSVREHLLDRVAINLSADLPMSFDDRVAAVEIATKFQQSSNEVFKMVEEETEFAKTQIILAREYLKDVSISREQLKYLVMEALRGCCQGHRAELYAARVAKCLAALEGREKVYVDDLKKAVELVILP…
	ChlI	c26979.graph_c0	ATGGCGGGGCTCTCGATACAATACTATACATCTTCACCTTCTCTTTTGAGCTCTAAATCTCGAGTTCTTCGTTCTTCGACTCCCCTCTCTCTCGCTTCCGTTCCGAATCGTAGAATATCACACGGAGGGACGAGACTCCGCGCTCCTCTTCGCGTCACCAACGTTGCAACAACCGAAATCACCGCCGAAGTGGCCAAGAAGCAAGCGAAGGAAAGCCAACGCCCGGTCTACCCATTTGCAGCCATCGTTGGCCAAGATGAGATGAAGCTCTGC	MAGLSIQYYTSSPSLLSSKSRVLRSSTPLSLASVPNRRISHGGTRLRAPLRVTNVATTEITAEVAKKQAKESQRPVYPFAAIVGQDEMKLC
		c33919.graph_c0	ATGGCGTGTCTCTCAACACAATACTCAACTTCTCCTTCTCTCTTGAGCTCTAAATCTCGAGCTCTTCGTTCCTCGACTCCCCCCTCTCTCGTTTCCATTCCAGAACGTAGAATATCACGCAAAGGAACGAGACTCCATGTTCCTCTTCGGGTGTCCAACGTGGCCACTTCCGGTATCGCCGCTGAAGAGGCCAAGAAGCAAGCAAAGGAAACCCAACGCCCAGTCTACCCATTTGCGGCCATCGTCGGCCAAGATGAGATGAAGCTCTGCTTGCTGCTTAATGTGATCGACCCTAAAATTGGAGGAGTGATGATAATGGGTGACCGTGGTACAGGAAAATCCACAACTGTTCGTTCTTTAATAGATCTTTTACCTGAGATTAAAGTTGTTGTTGGTGAC…	MACLSTQYSTSPSLLSSKSRALRSSTPPSLVSIPERRISRKGTRLHVPLRVSNVATSGIAAEEAKKQAKETQRPVYPFAAIVGQDEMKLCLLLNVIDPKIGGVMIMGDRGTGKSTTVRSLIDLLPEIKVVVGDPFNSDPEDPESMGPEVRDRIAQGESLPATTVKITMVDLPLGATEDRVCGTIDIEKALTEGVKAFEPGLLAKANRGILYVDEVNLLDDHLVDVLLDSAASGWNTVEREGISISHPARFILIGSGNPEEGELRPQLLDRFGMHAQVGTVRDAELRVKIVEERARFDKDPKGFRESYEAEQEKLQQQITAARSSLGSVQIDHDLRVKISKVCSELNVDGLRGDIVTNRSAKALAALKGRDKVMAEDIATVIPNCLRHRLRKDPLESIDS…
		c24082.graph_c0	ATGCACGCCCAAGTCGGGACCGTTAGAGATGCGGAGCTCAGGGTTAAGATTGTTGAAGAAAGAGCGAGGTTCGACAAAGATCCAAAAGGGTTTAGGGAGTCGTACAAGGCAGAACAGGAGAAGCTCCAAGAGCAGATTGGAGCAGCTAGAAGCTCACTCGGTTCGGTTCAGATTGATCACGACCTGAGGGTGAAGATTTCAAAGGTG	MHAQVGTVRDAELRVKIVEERARFDKDPKGFRESYKAEQEKLQEQIGAARSSLGSVQIDHDLRVKISKV
		c9856.graph_c0	ATGTCTCCTCTCAACCCATCAACATTGAGCTCTGAACAAACTCTAGAGATCTTCACCTTCAATTCCCTATCAATC	MSPLNPSTLSSEQTLEIFTFNSLSI
	ChlM	c34096.graph_c0	ATGGCATTCTCATTCTCAGCAATATTATCCCCAGCTCCCCCCTTCTCCACCCTCTCCTCACTCCCCCGCCGCTTGAAACCTCCGTCCGCCCTCCCCACCGACCTCCCTCCCGCCGCCATCGCCGTGACGTCGGCCGCCGCCATCGCCGCAGCAGCCATATCCCTCTCCGACCCTGAGCGCCGGAGGCAGCAGCAGTCGCAGTCCCTCGGCGGCCTCGAAGACAAGGAGGTCGTCCGCGACTACTTCAACAACACGGGGTTCCAGCGCTGGCGGAAGATCTACGGGGAGACCACTGACGACGTCAACGCCGTGCAGCTCGACATCCGCCTCGGCCACTCCAAGACGGTCGAGAACGCCATCACAATGCTCAAGGACGACGGCCCCCTCGCCGGGGTGACC…	MAFSFSAILSPAPPFSTLSSLPRRLKPPSALPTDLPPAAIAVTSAAAIAAAAISLSDPERRRQQQSQSLGGLEDKEVVRDYFNNTGFQRWRKIYGETTDDVNAVQLDIRLGHSKTVENAITMLKDDGPLAGVTVCDAGCGTGSLAIPLAREGAVVSASDISAAMVSEAKAKSEKEFQSLSGITMPKFEVKDLESLDGKYHTVICLDVLIHYPQEKAEGMIAHLASLAERRLILSFAPKTLYYGLLKRVGELFPGPSKATRAYLHAERDVERALNKVGWTVNKKGFIGTQFYFANLIEAVPVGAAN
	ChlE	c35935.graph_c0	ATGGCAGCAGCAGCAGCAGAGCTGTCCCTCGTAAAACCCATTACCAAGCTCAACAGACCCAGCTCAAAATTCACCCCATTGAGACCCAACTTCCTAGTAATCAGAGCCACCTCAGCTTCAACCCCGGCAAAGCCAAAGCCAAGGAAAGGAGCCAAGACTGAGATAAATGAGTCGCTTTTGACCCCAAGGTTCTACACAACTGACTTTGATGAGATGGAGATGCTGTTTAACAAGGAGATAAACAAGAACCTGAACCAGGCCGAGTTCGAGGCATTGCTGAATGAGTTTAAGACTGATTACAATCAGACCCACTTTGTGAGAAATACGGAGTTTAAGGAGGCGGCCGATAAGATGCAGGGGCCGTTGAGGCAGATATTCGTGGAGTTCTTGGAGAGGTCC…	MAAAAAELSLVKPITKLNRPSSKFTPLRPNFLVIRATSASTPAKPKPRKGAKTEINESLLTPRFYTTDFDEMEMLFNKEINKNLNQAEFEALLNEFKTDYNQTHFVRNTEFKEAADKMQGPLRQIFVEFLERSCTAEFSGFLLYKELGRRLKKTNPVVAEIFSLMSRDEARHAGFLNKGLSDFNLALDLGFLTKARKYTFFKPKFIFYATYLSEKIGYWRYITIYRHLK
	4VCR	c38272.graph_c2	ATGTCCCTAGCCTTATCCCCCTCCAACCCTCTTCTTCTTCCGTCACCCACACTCTTGCATCCTAACCCCCTCATCTACCGACTCACCCACTGCAAACCCAGAAGAATCTATTCAATAAAACTCTTCCGCAGCAGCAGCAGCACTACCACCCCCATTAGCAACACCTCCACCTCCATCAATGAACCAAAACCAACTCTTACCCCCTTCAGAACCAAACCCACGAGGGAGATCACAGTCATGGTGGTGGGCTCCACCGGCTACATCGGCAAAGCTGTGGTCCGGGAGCTCGTCTCCCGGGGCTTCGACGTGGTCTCCGTGGCTCGCCAACAGAGCGGCATTTTTGGCCGCAACGACAAGGACCAGACATTGAATCAACTCGTGAGATCCAATGTCATTTTC…	MSLALSPSNPLLLPSPTLLHPNPLIYRLTHCKPRRIYSIKLFRSSSSTTTPISNTSTSINEPKPTLTPFRTKPTREITVMVVGSTGYIGKAVVRELVSRGFDVVSVARQQSGIFGRNDKDQTLNQLVRSNVIFSDVTDVELLREAVAQLGRPVDVVVSCLASRNGGVKDSLAIDYAATKNSLIAGRAYGATHFVLLSAICVQKPLLEFQRAKLKFEAELMEEAKKDPNFTYSIVRPTAFFKSLAGQVELVKDGKPYVMFGDGRLCACKPISEEDLARYIADCVMDENKVNKVLPIGGPGKALTPVEQGEMLFRILGKEPKFLKVPIGVMDFAIGVLDFLVKVFPGLEDAAEFGKIGRYYAVESMLVLDPETGEYSGDTTPSYGKDTLEEFFKRVIREGM…
	POR	c25974.graph_c0	ATGGCTCTTCAAGCTTGCTTCTTCCCTTTAGCTCTCTCGGCCCACAAAGAGGGAAAGTTTGCTGTTAAGGACTCGGTTTTCTTAGGGGCCCCTCTTTCTGAACATGTCAAATCTGATTTTAGTCCTTTAGTCCTCAGGTGTAAGAGGGCACACGTCTCCATCGGTGTGCATGCCCAAGCCACCGCCACTGCCACTGTCACCCCAGCGGTCAATCAGGCAATCCCAGACCGAAAGAAAACACTAAGAAAGGGCACTGTAGTAATCACTGGCGCCTCATCCGGCCTCGGCCTGGCAACGGCCAAAGCGCTGGCCGAGACGGGCAAATGGCACGTGATCATGGCGTGTCGCGACTTCCTAAAGGCCGAGAAGGCAGCGAAATCAGCAGGCATGCTCAAGGAG…	MALQACFFPLALSAHKEGKFAVKDSVFLGAPLSEHVKSDFSPLVLRCKRAHVSIGVHAQATATATVTPAVNQAIPDRKKTLRKGTVVITGASSGLGLATAKALAETGKWHVIMACRDFLKAEKAAKSAGMLKESYSIMHLDLASLDSVRQFVDNLKKSGMPLDVLVCNAAVYQPTASKPSYTADGFEMSVGVNHLGHLLLARLLLDDLKESDYPSRRLIIVGSITGNTNTLAGNVLPKANLGDIRGLAAGLNGTAGSTMIDGGQFDGAKAYKDSKVCNMLMMQEFHRRYHEETGITFASLYPGCIATTGLFREHIPLFRLLFPPFQKYITKGFVSEHDAGKRLAQVVSDPSLTKSGVYWSWNKNSASFENQLSQEASDVEKARKVWEISEKLLGLA
		c59191.graph_c0	ATGATTGATGGCGGAGATTTCGACGGTGCAAAGGCTTACAAAGACAGTAAAGTCTGCAATATGTTGACAATGCAAGAGTTTCACAGGCGTTTCCATGAAGAAACTGGAGTCACTTTCGCTTCGCTTTACCCCGGTTGCATCGCCTCCACAGGTTTATTCCGAGAGCACATTCCTCTCTTCCGTGCCCTCTTCCCTCCCTTTCAGAAGTACATCACTAAAGGATATGTCTCCGAAACAGAG	MIDGGDFDGAKAYKDSKVCNMLTMQEFHRRFHEETGVTFASLYPGCIASTGLFREHIPLFRALFPPFQKYITKGYVSETE
		c14767.graph_c0	ATGTTTTTAGCTCTGAAAAATAATCAAACGCATCAT	MFLALKNNQTHH
		c25049.graph_c0	ATGCTCAAGGAGAACTACAACATCATGCACCTTGATCTCGCCTCTCTCAACAGCGTCCGCCAGTTCGTCGACAACTTGAAAAGATCGGGCATGTCTTTGGACGCCCTCGTGTGCAATGCCGCTGTGTACCAACCAACGGCTAGCGAGCCGAGTTACACCGCAGATGGGTTTGAGATGAGTGTTGGGGTGAACCATCTAGGTCACTTCCTTCTCGCTCGCTTGCTTCTTGATGACCTGAAGGAATCGGATTATCCCACGCGTCGCCTCATCATAGTTGGC	MLKENYNIMHLDLASLNSVRQFVDNLKRSGMSLDALVCNAAVYQPTASEPSYTADGFEMSVGVNHLGHFLLARLLLDDLKESDYPTRRLIIVG
		c38307.graph_c0	ATGGCTCTTCAGGCTTCCGCCATTCTTCCTTCAGCTCGCACTGCTCACAAAGAGGTCAAGGCCGGTGCGAAGGAATCATTATTTTTGGGGACACCGCTTGCGGGACACATCAAATCCGAATTTAATCCGCTAGTGCTCAGGAGTAAGAAGGCAAGCGCTCCAGCCGGCGTGCGTGCCCAGGCGGCAGCCACTGTCACGCCGGAAGTCAGTCGAAGCACACCAGAAGGGAAGAAAACCCTACGAAAGGGCAATGTAGTAATTACCGGCGCCTCCTCCGGCCTCGGCCTAGCGACTGCCATAGCACTAGCAGAGAACGGGAAATGGCACGTGATCATGGCCTGTCGCGATTTCCTCAAGGCAGAGAGAGCAGCTAAATCCGCCGGCATGCCCAAGGAGAAC…	MALQASAILPSARTAHKEVKAGAKESLFLGTPLAGHIKSEFNPLVLRSKKASAPAGVRAQAAATVTPEVSRSTPEGKKTLRKGNVVITGASSGLGLATAIALAENGKWHVIMACRDFLKAERAAKSAGMPKENYTIMHLDLASLNSVRQFIESLKRSGLPVDVAVCNAAIYQPTAKEPSYTADGFEMSVGVNHLGHFLLSRLLLDELKESDHPSRRLIIVGSITGNTNTLAGNVPPKANLGDLRGLAAGLNGTGGSAMIDGGQFDGAKAYKDSKVCNMLMMQEFHRRYHEETGVAFASLYPGCIATTGLFREHIPLFRLLFPPFQKYITKGFVSEEDAGKRLAQVVTDPSLTKSGVYWSWNKNSASFENQLSEEASDVEKARKVWEISEKLVGLKA
	CAO	c36852.graph_c0	ATGACGACTGCTTCAGCTCTGTCTTTGCTGCCCGTTACACTTCGGCGTCCTTCTTCAAATTTCTACTCAAAAAAGGGTAGTTGTAAAGTAGGATTCAGGGTGTTGGCTGTATATGGGGAAGAAGATGGAGGTGGGTTGAAAAAAAAGAATACTTGGGAAGCAATTTTTTTTGTGGAGGATCCTCGGCCAATTGTTCCTCTATCTAAAGGGAAGTTCCTTGATGCGAACCAAGCTTTGGAGGTGGCAAGGTTCGATATTCAGTATTGTGATTGGAGAGCTCGCCAGGACTTGCTACGCATCATGATTCTCCATGAGAAGGTGGTAGACGTCCTTAACCCTTTGGCACGCGAATTTAAATCGGTTGGGATGTTGAAGAAAGAGCTTGCACAGCTGCAGCAA…	MTTASALSLLPVTLRRPSSNFYSKKGSCKVGFRVLAVYGEEDGGGLKKKNTWEAIFFVEDPRPIVPLSKGKFLDANQALEVARFDIQYCDWRARQDLLRIMILHEKVVDVLNPLAREFKSVGMLKKELAQLQQELAQAHHQVHISEARVDAALDKLAYVETLVHERLLQDKNTNESSSDCTSLQPSTSETAKTGAQRKSLNVSGPVKPYHPNLKNFWYPVAFAGDLKADMMIPIDCFEESWVIFRGKDGKPGCVQNTCAHRACPLDLGTVNEGRIQCPYHGWEYSTDGKCEKMPSTRMLNVRIRSLPCFEHDGMIWIWPGDAPCMTTLPSLQAPPGFKIHAEIVMELPVEHGLLLDNLLDLAHAPFTHTSTFAKGWSVPSMVKFLTPASGLQGYWDPYP…
	ChlG	c35800.graph_c1	ATGACTTCTCTTATTTACAATTATGCCTCCGTCGCCGCCGCCGCCGCGACCAATAGCATTATGCCACGCCAGCATCGCCTCCCATCGCTACACCGTTCACCTCACCTCGTCTCCGTTTCTCGGCGGAGATTAACAGTCACAGCTACAGAAACCGATGCCAATGAAGTTAAGCCTGCAGCACCCGACAAGGCTCCGATGAGTGCTGGTGGTTCAAGCATCAATCAACTTCTTGGAATAAAGGGCGCTAAACAAGAAACAGATAAATGGAAAATTCGTCTCCAACTTACCAAACCTGTTACTTGGCCTCCACTGGTATGGGGAGTAGTATGTGGAGCTGCTGCTTCTGGAAACTTCCATTGGAATCTTGAAGATGTAGCTAAAGCTATTGTTTGCATGACT…	MTSLIYNYASVAAAAATNSIMPRQHRLPSLHRSPHLVSVSRRRLTVTATETDANEVKPAAPDKAPMSAGGSSINQLLGIKGAKQETDKWKIRLQLTKPVTWPPLVWGVVCGAAASGNFHWNLEDVAKAIVCMTMSGPCLTGYTQTLNDWYDREIDAINEPYRPIPSGAISENEVITQIWVLLLGGLGLAGFLDVWAGHNFPVIFYLAIGGSLLSYIYSAPPLKLKQNGWIGNFALGASYISLPWWAGQALFGTLTPDIIVLTILYSIAGLGIAIVNDFKSVEGDRAMGLQSLPVAFGAETAKWICVGAIDITQLSVAGYLLGSGKPYYALALLGLIVPQVFFQFKYFLKDPVKYDVKYQASAQPFLVLGLLVTALASSH
	CLH	c40400.graph_c0	ATGCCATCTACTTCCATTAATGTGTTTGATGTCGGTAAGCACACGGTTAAGCTTCAGAAAATTGTGCAGGAACCTTGTGCAGGTTCCAATTTATCGCCACCGAAGCCACTTTTGATCGCAGCTCCATGTGAAGAAGGGGAGTTTCCTGTAGTAATATTACTTCATGGATACCTTCTCAACAATCATTTCTACTCTCAGCTTATTCAACATGTTGGTTCTCATGGGTTCATCGTCGTTGCGCCTCAGTTATACAACATAGCAGGACCAGATTCCGAAGAAGAGATCAAATCGGTTGCAACGATTACCGACTGGCTACCCGATGGACTAACTCCTCGCCTTCCTCAAGGTGTCACTCCAAACCTACACAAACTCGCTCTGTCGGGCCACAGTCGCGGAGGC…	MPSTSINVFDVGKHTVKLQKIVQEPCAGSNLSPPKPLLIAAPCEEGEFPVVILLHGYLLNNHFYSQLIQHVGSHGFIVVAPQLYNIAGPDSEEEIKSVATITDWLPDGLTPRLPQGVTPNLHKLALSGHSRGGKVAFALALGHAETKLKFSALIGIDPVDGMDKGKQTNPPVLTYTPRSFDLKIPALIIGSGLGGVKKNPLFPPCAPKGVSHEDFFKECREQAWHFVAKEYGHLDMLDDETMGLRGKFSHCLCKSGKARKPMRDFVSGIMVAFLNGYLKDQMAELVAMRDKPESAPIEISVSFI
		c27309.graph_c0	ATGGCAGCTGTTAAGAGTGTTTTTGAGTATGGAAAGCTAAGCGTAGAACAGTTCAAAGTTGAGGCCGGCAACTGCAATGATGCCAATTGTCCGCCTCCGAAGCCTCTTTGGATTGCGACTCCGGTGGAGGCCGGGCAATACCCGTTGGTTCTCTTCATCCATGGCTTCCTTATTGGCAACAGTTGCTACAGCCAACTTCTTCAACAGATTGCATCCCATGGCTTCGTTATTGTCGCACCTCAGTTGTCAATTTCTTCACTCCTAAATCCCGAAGAAGACATCAATGGAGCTGTCGAAACTGCCAACTGGTTCGCAAATGGCAAACTCGGCCAATCCATCCTCCCCAAAGGCGTCGAGCCTGATCTCCTTAAACTAGGGCTTGTCGGACACAGCAGAGGT…	MAAVKSVFEYGKLSVEQFKVEAGNCNDANCPPPKPLWIATPVEAGQYPLVLFIHGFLIGNSCYSQLLQQIASHGFVIVAPQLSISSLLNPEEDINGAVETANWFANGKLGQSILPKGVEPDLLKLGLVGHSRGGLDAFSIALGRAQITLKMKFSALIGIDPVAGLSKSLQIPPKILTYKPSSLDVNMPALVIGTGLGDKQNNPLFPACAPDGVNYKEFYDECMAPCYLFVVSDYGHLDLLDDNAPGIFKCLCKNGSNCRDLMRRTTAGLATAFLKAKLEEENRLLQELLDDPTSAPTKLDPVTFRENRAALVDII
		c61397.graph_c0	ATGTCCAGCTCGAAAGATTCCGGTTTATACGTTAAGATATGCGGATCGGTTCTAATGTATTTGTTAGTTCCTGCGACTGGATCAATTCCTATTAGAGCTGAAAACGTGATGGATGGGTCTAATGTTGCGGCATGGCCTAGCGCAACCGCAAACGCCGTTTTC	MSSSKDSGLYVKICGSVLMYLLVPATGSIPIRAENVMDGSNVAAWPSATANAVF
Chlorophyll degradation	NYC1	c35486.graph_c0	ATGGCGGCGGTTTCACTGACGAGGCTACAGCTCTCAGTCCACGCCTCGGATGTCTCGAGAGGTCGTCTCAGCCGTCGGATTCAGCTGAACCTCGATCGGAGATCTTGGCGATGCCGAGCGTTTAAATCGGAGGAGGGGGAGGAGAAATCTAACGGGGATGGTGAGAAGAAGAAGACGAAGAGGAAAGGGCCACTTTACGATGTGAAGGGTTTGATGGTTAGGGTTTTGGGATCGAAGGTTGAGGTTGAAGGAAAATATAAGAAGACAGTGGAAAAAGCGGAAGAAATTTTCTTTTCGGTTGTCACACAGGTTGGAAGGTATATGCTCACCATGATGAGTACTGGTGTTATTCTTGCAGTGGGATTTCAGTTGTCAGGTGGGGATAGCCAGATGAATACC…	MAAVSLTRLQLSVHASDVSRGRLSRRIQLNLDRRSWRCRAFKSEEGEEKSNGDGEKKKTKRKGPLYDVKGLMVRVLGSKVEVEGKYKKTVEKAEEIFFSVVTQVGRYMLTMMSTGVILAVGFQLSGGDSQMNTLIWYSWLGGVIIGTMIGANMVLEEHSKAGPRNVVITGSTRGLGKALAREFLLSGDRVVIASRSPESVETTVEELKENLKEGVQIAGSKGAAKFSHAKIVGVSCDVCNPDDVRKLANFAVNELGRIDLWINNAGTNKGFRPLLQFTDEEINQIVSTNLVGSIICTREAMHIMQSQDKGGHIFNMDGAGSGGSSTPLTAVYGSTKCGLRQLQASLLKECKRTKVGVHTASPGMVLTDLLLSGSTLRNKQMFNIICELPETVARTLAPR…
		c49900.graph_c0	ATGATGAAAGCGCAAACAACAGAAAGAGAGAAAACAGAGACCCAAGTATTCTCTGTATACATCTCCATCGCGTCTGTTAACGACAACCTCGTCCTGTTCTCTGCCCAGTTCCTTAGTCTATCTGCTTCTGCTGCATATAACGCC	MMKAQTTEREKTETQVFSVYISIASVNDNLVLFSAQFLSLSASAAYNA
		c56544.graph_c0	ATGGATGGTGCTGGCTCTGGAGGTTCAAGTACTCCTCTCACTGCCGTATATGGTTCAACAAAATGTGGACTTAGGCAGTTTCATGGGTCTATAGTGAAAGAAAGCCAAAAAACAAACGTTGGCCTTCACACTGCATCCCCTGGCATGGTTCTGACAGAACTTCTTCTCAGTGGTTCGAGCATTAAAAACAAGCAGATGTTTAACATAATCTGTGAGCTTCCTGAGACAGTAGCTAGAACTTTGGTACCACGAATGCGAGTTGTGAAAGGTTCGGGAAAAGCCGTCAATTACCTAACT	MDGAGSGGSSTPLTAVYGSTKCGLRQFHGSIVKESQKTNVGLHTASPGMVLTELLLSGSSIKNKQMFNIICELPETVARTLVPRMRVVKGSGKAVNYLT
		c24828.graph_c0	ATGGCGCTCCTCGCATCTCTTCCCGCTCTCTCCCTCTCTTCTCCCTCCCTTCTCGCTCCAATACGACCTCTGCGGTGCGAACCGCCCGGTCCATACCCCGGTTCAAAATTCCTCGCTTTCGAGCCGATCAAGAAGAGTATAGGGCATCGGAATCGGAAGAATCCGAAGAGAATCTCGGCGGAATCTCCAGTTGAATCGGAATCCATGGCCCCCCCTTACAACGTCCTCATCACTGGTTCCTCCAAAGGAATTGGATACGCACTTGCTAAAGAGTTTCTAAAAGCAGGTGACGATGTCTTAATATGTTCTCGATCAGCTGAGCGAGTAGAATTGGCAGCTCGGAGCTTGAAAGAGGAATTTGGAGAGCAACGTGTGTGGGGAACAACATGCGACGTCAGG…	MALLASLPALSLSSPSLLAPIRPLRCEPPGPYPGSKFLAFEPIKKSIGHRNRKNPKRISAESPVESESMAPPYNVLITGSSKGIGYALAKEFLKAGDDVLICSRSAERVELAARSLKEEFGEQRVWGTTCDVREGKDVKALVAFARDKLGYVDIWINNAGSNAYSYKPLAETSDDDLMEVVTTNTLGLMICCREAINMMLKQPRGGHIFNIDGAGSDGRPTPRFAAYGATKRSVVHLTKSLQAELQMQDVKNVVVHNLSPGMVTTDLLMSGATTKQAKFFINILAEPPEVVAEYLVTSIRSVPTRQSMRPTYIKFLTGLKAYSQIFSRLAFGARRNRFLMED
	HCAR	c31236.graph_c0	ATGGCCATGGCCGCAATTTTCAATTCCTCGCCATTAACCACCGTCTCTACGTCGATCCGATGCTCATCATCTTCAAAAGATTCGACTTTGGATTCTGTGAATATTCGAGACGATTGGAGGAGCCGATCGAAGCCCATCCGCCCTGGCGGCGTGTATCCTGCTAAGGATCAGTGCAGTCGATGTGGCTTGTGTGATACTTACTACATTGCTCATGTCAAGAATGCGTGTGCTTTTCTAGGAGACGGCATGTCAAGAATTGAGGAATTGGAACCGCGAGTGCATGGAAGGGGAAGGAATGGGGGATCAGATGAGTTGTACTTTGGTGTGCATGAAGAGTTAATGTATGCTAGAAAAACTGAGCCTGTGGAAGGAGCTCAGTGGACAGGAATCGTAACAACT…	MAMAAIFNSSPLTTVSTSIRCSSSSKDSTLDSVNIRDDWRSRSKPIRPGGVYPAKDQCSRCGLCDTYYIAHVKNACAFLGDGMSRIEELEPRVHGRGRNGGSDELYFGVHEELMYARKTEPVEGAQWTGIVTTIAAEMLKANLVDAVICVQSDPDDRLSPKPVLARTPDEVYAAKGVKPTLSPNLDTLALVEAAGVKRLLFCGVGCQVQE
	PPH	c35959.graph_c0	ATGGAAGTGCTTCCTCTTTACAGCTCTATCCCATGTCGTTTCCATAATCTGACCTATAAGATCGAGGGCAACAACCAAAATTATAAAAGTTCTAAGCTCTTTATTCATAGAAAAGCTGGAATTTTGTGTTCGGGGACTAAACCCTCTTGGGCATCATATCACGTGAACAATGGAGATGTTGGATTACGAAGTATCCCTCAAAAAGCTGATGACGTCTCAAAGGTCTTAATTCCACGTTTGCCAAATGAATCCGATGGAAACCAGGCTTCTCCAATTAGTAGTGGTTTTTGGGAATGGAAGCCAAAGCTAACAATTCATTATGAGAAATCCGGGGAAGAAAATGTCAGCGCACCAAATGTGTTATTTCTTCCAGGTTTTGGTGTTGGGACTTTTCATTAT…	MEVLPLYSSIPCRFHNLTYKIEGNNQNYKSSKLFIHRKAGILCSGTKPSWASYHVNNGDVGLRSIPQKADDVSKVLIPRLPNESDGNQASPISSGFWEWKPKLTIHYEKSGEENVSAPNVLFLPGFGVGTFHYEKQLKDLGRQYRVWTLDFLGQGMSLPSEDPAPSNSQKSSSEERDVLWGFGEESQPWAQELAYSVDLWQEQVQNFVEQVIGEPVYVVGNSLGGYVALYFAACNPQLVKGVTLLNATPFWGFLPNPIKSPKLARLFPWAGTFPLPSNVRRLTEFVWQKISDPNSIEEVLKQVYADHSTRVDKVFSRIIEITEHPAAAASFASIMFSPRGQLSFQEALNGCQLQNIPICLVYGKEDPWVRPIWGKKVKQQIPEAPYYEISPAGHCPHDE…
	PAO	c36607.graph_c0	ATGGCAATAGCTGCAGTAGCAGCTGCGGTAACAACCGCCTCTTCTTTTCGTCTGCCCTTTCCAAACCTGAGCCCTACTCTCTTCTCTTCTTCTTCAACAGCTTATTCTCATCGCCTCCACGGCCGTCGTCGTCATGTCCCGCCAATTCTCCGAGTTGCGACACCGACTCCGATCTCTGAAGACGACCCCAAAACCCTAGAGATCAAAGAACAATCTTTTGCTTCTACTTCTGATTCGTCCGAATCGTTCTCGTGGAGAGATCACTGGTATCCAGTTTCCCTGATTGAAGATCTCGATGCTCGACTTCCAACTCCGTTTCAGCTCCTCAATCGAGACATCGTGTTGTGGAAGGATCCTAAGACTGGAGATTGGGTCGCTTTCGACGATAGATGTCCTCAT…	MAIAAVAAAVTTASSFRLPFPNLSPTLFSSSSTAYSHRLHGRRRHVPPILRVATPTPISEDDPKTLEIKEQSFASTSDSSESFSWRDHWYPVSLIEDLDARLPTPFQLLNRDIVLWKDPKTGDWVAFDDRCPHRLAPLSEGRIDEDGCLQCSYHGWSFNGKGTCTKIPQAASEGPEARSVRSPRANVAKLPTLVSQGLLFVWPDESSWEKASQTKPPLLPDEFNDPGFSTVTIQRDLFYGYDTLMENVSDPSHIEFAHHKVTGRRDRAKPLTFKLESRGCWGFAGSNTGNPRVCSKFVAPCYYMNKVEIDTKLPFVGDQKWVIWICSFNIPMAPGKTRSIVCSARNFFQFTMPGPAWWQLVPRWFEHWTSNLVYDGDMIVLQGQEKIFLSKALEGSADV…
	RCCR	c30782.graph_c0	ATGTTAGCAGCCCTTGTTCCGTACCACCAATCATTCTCTCATCTCCATCCTCCTCTTGGAAGAAGAAGAAGAAGAATCGAAGTCCGATCTTCGATGGATCCACCGGTGAGCAGACCACCGGCGTTGACCGGATTTCCTTACCTCCCGCTGGCGCACAGGGACCTGATGCTGGATCTGGTCACATCCATCGAGTCTCGGCTGGGCCCCGCCCTCCTGCCCTCCGCCGTGCCGGACGACGTCCTGTACTTCGAGAGCGAGCAGGGCACTTCCCAGGGCGCCCTCGACATCCGACCGGGCGCTCAGAATTCTTCGGTCGATTTCATATTAGAATCATGGCTCCATTGCAAGGTTCCAGCCGGCGATCTCAACATAACGACCATCTTCGCCTTCCTCAACACG…	MLAALVPYHQSFSHLHPPLGRRRRRIEVRSSMDPPVSRPPALTGFPYLPLAHRDLMLDLVTSIESRLGPALLPSAVPDDVLYFESEQGTSQGALDIRPGAQNSSVDFILESWLHCKVPAGDLNITTIFAFLNTSTDAPHLLMEFIQGSPTSLVLFIDLLPRKDLVLHPDYLDEFYSSTDLDRLRGDLEKAPQISPYRSSSLYIRSVLSPTAVAVDVNCGAEGESCMEEIVGTRISRVAKEVVELWLSKCASRRKDLGEVERAVLLERDSLIKNKTVEIDLAANLPRMFGPDVAGRVVGEIQKAFRIK
