# Supplementary material for: Structure of Pigment Metabolic Pathways and Their Contributions to White Tepal Color Formation of Chinese Narcissus tazetta var. chinensis cv Jinzhanyintai
Source: Int J Mol Sci. 2017 Sep 8;18(9):1923. doi: 10.3390/ijms18091923 (PMC5618572; doi:10.3390/ijms18091923)
Supplement: Supplementary file 1 [file ijms-18-01923-s001.zip › R-Table S16.xls]

## Sheet: Sheet2
Table S11. List of unigenes of chlorophyll metabolic pathway in tepal transcriptome of Chinese narcissus.
Pathway	Gene	Gene ID	Length	Sequence integrity	E-value	Reference annotation	Reference sequence id	T2 (RPKM)	T3 (RPKM)	T4 (RPKM)	T5 (RPKM)
ALA formation	HemA	c35985.graph_c0	1593	0.9889	0	Glutamyl-tRNA reductase, chloroplastic OS=Oryza sativa subsp. japonica GN=Os10g0502400 PE=2 SV=1	sp|P0C587|HEM1_ORYSJ	272.51	70.06	52.49	52.22
		c30156.graph_c1	705	0.4423	1.33054e-47	Glutamyl-tRNA reductase 2, chloroplastic OS=Arabidopsis thaliana GN=HEMA2 PE=2 SV=2	sp|P49294|HEM12_ARATH	2.7	2.42	2.87	4.05
		c41874.graph_c0	564	0.3501	2.25967e-106	Glutamyl-tRNA reductase, chloroplastic OS=Oryza sativa subsp. japonica GN=Os10g0502400 PE=2 SV=1	sp|P0C587|HEM1_ORYSJ	1.24	1.11	0	0
	HemL	c37283.graph_c0	1431	0.9958	0	Glutamate-1-semialdehyde 2,1-aminomutase, chloroplastic OS=Oryza sativa subsp. japonica GN=GSA PE=2 SV=1	sp|Q6YZE2|GSA_ORYSJ	207.59	141.73	106.73	81.51
		c25411.graph_c0	414	0.2911	4.3218e-84	Glutamate-1-semialdehyde 2,1-aminomutase, chloroplastic OS=Brassica napus GN=GSA PE=2 SV=1	sp|Q85WB7|GSA_BRANA	35.94	11.18	5.21	8.93
Proto IX formation	HemB	c31368.graph_c0	1278	0.9977	0	Delta-aminolevulinic acid dehydratase, chloroplastic OS=Oryza sativa subsp. japonica GN=HEMB PE=2 SV=1	sp|Q5Z8V9|HEM2_ORYSJ	83.69	52.52	47.03	54.53
	HemC	c36032.graph_c0	1095	1	0	Porphobilinogen deaminase, chloroplastic OS=Oryza sativa subsp. japonica GN=HEMC PE=2 SV=1	sp|Q6H6D2|HEM3_ORYSJ	136.32	52.51	44.32	41.12
		c14365.graph_c0	240	0.2228	1.1353e-11	Porphobilinogen deaminase, chloroplastic OS=Oryza sativa subsp. japonica GN=HEMC PE=2 SV=1	sp|Q6H6D2|HEM3_ORYSJ	9.97	3.75	5.52	7.54
	HemD	c31392.graph_c0	864	0.9505	1.1808e-116	Uroporphyrinogen-III synthase, chloroplastic OS=Oryza sativa subsp. japonica GN=UROS PE=2 SV=1	sp|Q10QR9|HEM4_ORYSJ	23.06	18.86	21.51	19.01
	HemE	c37636.graph_c0	1224	0.9737	0	Uroporphyrinogen decarboxylase 1, chloroplastic OS=Arabidopsis thaliana GN=HEME1 PE=2 SV=2	sp|Q93ZB6|DCUP1_ARATH	73.7	34.84	12.79	8.35
		c21380.graph_c0	1182	1	0	Uroporphyrinogen decarboxylase, chloroplastic OS=Nicotiana tabacum GN=DCUP PE=1 SV=1	sp|Q42967|DCUP_TOBAC	112.07	59.1	44.46	39.07
	HemF	c64052.graph_c0	234	0.2016	6.87929e-51	Coproporphyrinogen-III oxidase 1, chloroplastic OS=Arabidopsis thaliana GN=CPX1 PE=2 SV=1	sp|Q9LR75|HEM61_ARATH	0	2.52	0	0
		c31690.graph_c0	1152	0.9948	0	Coproporphyrinogen-III oxidase, chloroplastic OS=Glycine max GN=CPX PE=1 SV=1	sp|P35055|HEM6_SOYBN	97.81	34.5	21.7	14.12
	HemN	c20109.graph_c0	1422	1	9.28476e-94	Oxygen-independent coproporphyrinogen-III oxidase-like protein sll1917 OS=Synechocystis sp. (strain PCC 6803 / Kazusa) GN=sll1917 PE=3 SV=1	sp|P73245|Y1917_SYNY3	6.27	4.17	2.54	2.55
	HemY	c32739.graph_c1	1044	0.648	0	Protoporphyrinogen oxidase, chloroplastic OS=Oryza sativa subsp. japonica GN=PPOX1 PE=2 SV=1	sp|Q9AR38|PPOC_ORYSJ	85.65	47.97	56.44	62.11
		c36699.graph_c0	954	0.5977	2.41782e-175	Protoporphyrinogen oxidase, chloroplastic/mitochondrial OS=Spinacia oleracea GN=POX2 PE=1 SV=1	sp|Q94IG7|PPOCM_SPIOL	14.9	14.9	14.08	18.57
Heme formation	HemH	c34624.graph_c0	1581	1	0	Ferrochelatase-2, chloroplastic OS=Oryza sativa subsp. indica GN=HEMH PE=2 SV=2	sp|A2Y3Q5|HEMH_ORYSI	14.79	18.36	19.51	14.54
		c23926.graph_c0	129	0.0835	9.10819e-22	Ferrochelatase-2, chloroplastic OS=Cucumis sativus GN=HEMH PE=2 SV=1	sp|P42044|HEMH_CUCSA	1.23	10.97	19.08	20.37
		c36969.graph_c0	1467	1	0	Ferrochelatase-1, chloroplastic OS=Oryza sativa subsp. japonica GN=Os09g0297000 PE=2 SV=1	sp|Q69TB1|HEMH1_ORYSJ	12.89	43.95	79.41	134.01
		c32498.graph_c0	648	0.809	5.53446e-14	Sirohydrochlorin ferrochelatase OS=Bacillus megaterium GN=sirB PE=3 SV=1	sp|P61817|SIRB_BACME	12.85	11.73	11.1	8.17
	COX10	c28536.graph_c0	1350	1	2.5392e-158	Protoheme IX farnesyltransferase, mitochondrial OS=Arabidopsis thaliana GN=COX10 PE=2 SV=4	sp|O64886|COX10_ARATH	11.88	30.15	53.18	74.5
	COX15	c33455.graph_c0	1431	1	0	Cytochrome c oxidase assembly protein COX15 OS=Arabidopsis thaliana GN=COX15 PE=2 SV=1	sp|Q9FKT8|COX15_ARATH	21.52	41.99	79.78	103.67
		c22878.graph_c1	114	0.083	2.86942e-18	Cytochrome c oxidase assembly protein COX15 OS=Arabidopsis thaliana GN=COX15 PE=2 SV=1	sp|Q9FKT8|COX15_ARATH	1.48	4.24	4.39	5.1
Chlorophyll formation	ChlH	c38753.graph_c0	4146	1	0	Magnesium-chelatase subunit ChlH, chloroplastic OS=Oryza sativa subsp. indica GN=CHLH PE=3 SV=1	sp|B8ANF1|CHLH_ORYSI	225.62	38.11	3.6	10.65
		c55025.graph_c0	165	0.04	1.53812e-42	Magnesium-chelatase subunit ChlH, chloroplastic OS=Arabidopsis thaliana GN=CHLH PE=1 SV=1	sp|Q9FNB0|CHLH_ARATH	0	0	1.49	0
	ChlD	c35182.graph_c0	2280	1.001	0	Magnesium-chelatase subunit ChlD, chloroplastic OS=Nicotiana tabacum GN=CHLD PE=2 SV=1	sp|O24133|CHLD_TOBAC	79.06	24	4.85	1.04
	ChlI	c26979.graph_c0	273	0.2156	6.79428e-12	Magnesium-chelatase subunit ChlI, chloroplastic OS=Glycine max GN=CHLI PE=1 SV=1	sp|P93162|CHLI_SOYBN	3.99	0.59	0.64	0
		c33919.graph_c0	1236	0.9904	0	Magnesium-chelatase subunit ChlI, chloroplastic OS=Oryza sativa subsp. japonica GN=CHLI PE=1 SV=1	sp|Q53RM0|CHLI_ORYSJ	238.34	78.23	14.1	6.65
		c24082.graph_c0	207	0.1659	9.81181e-55	Magnesium-chelatase subunit ChlI, chloroplastic OS=Oryza sativa subsp. japonica GN=CHLI PE=1 SV=1	sp|Q53RM0|CHLI_ORYSJ	2.27	0.92	1.1	0
		c9856.graph_c0	75	0.0588	2.27263e-68	Magnesium-chelatase subunit ChlI-1, chloroplastic OS=Arabidopsis thaliana GN=CHLI1 PE=1 SV=1	sp|P16127|CHLI1_ARATH	0	0	0.88	0
	ChlM	c34096.graph_c0	915	0.9744	1.48998e-124	Magnesium protoporphyrin IX methyltransferase, chloroplastic OS=Arabidopsis thaliana GN=CHLM PE=1 SV=1	sp|Q9SW18|CHLM_ARATH	106.36	58.71	26.38	13.15
	ChlE	c35935.graph_c0	687	0.5478	0	Magnesium-protoporphyrin IX monomethyl ester [oxidative] cyclase, chloroplastic OS=Hordeum vulgare GN=CRD1 PE=1 SV=1	sp|Q5EFU4|CRD1_HORVU	462.25	61.2	4.16	11.75
	4VCR	c38272.graph_c2	1230	0.9762	0	Divinyl chlorophyllide a 8-vinyl-reductase, chloroplastic OS=Cucumis sativus GN=DVR PE=1 SV=1	sp|J9RYI6|DCVR_CUCSA	70.5	30.67	13.48	5.07
	POR	c25974.graph_c0	1188	0.9925	0	Protochlorophyllide reductase, chloroplastic OS=Cucumis sativus GN=PORA PE=2 SV=1	sp|Q41249|PORA_CUCSA	1434.23	129.82	8.87	10.74
		c59191.graph_c0	240	0.199	1.8396e-57	Protochlorophyllide reductase B, chloroplastic OS=Arabidopsis thaliana GN=PORB PE=1 SV=3	sp|P21218|PORB_ARATH	0	0	1.21	0
		c14767.graph_c0	36	0.03	7.20317e-15	Protochlorophyllide reductase, chloroplastic OS=Cucumis sativus GN=PORA PE=2 SV=1	sp|Q41249|PORA_CUCSA	10.8	0	0	1.53
		c25049.graph_c0	279	0.24	9.70379e-48	Protochlorophyllide reductase A, chloroplastic OS=Oryza sativa subsp. japonica GN=PORA PE=2 SV=1	sp|Q7XKF3|PORA_ORYSJ	18.14	0	0	0
		c38307.graph_c0	1188	0.9925	0	Protochlorophyllide reductase, chloroplastic OS=Daucus carota GN=POR1 PE=2 SV=1	sp|Q9SDT1|POR_DAUCA	274.72	130.27	24.68	11.63
	CAO	c36852.graph_c0	1602	0.9871	0	Chlorophyllide a oxygenase, chloroplastic OS=Oryza sativa subsp. japonica GN=CAO PE=2 SV=1	sp|Q8S7E1|CAO_ORYSJ	32.03	21.26	9.04	3.82
	ChlG	c35800.graph_c1	1137	0.9768	0	Chlorophyll synthase, chloroplastic OS=Arabidopsis thaliana GN=CHLG PE=2 SV=1	sp|Q38833|CHLG_ARATH	94.07	64.11	59.62	56.98
	CLH	c40400.graph_c0	912	0.953	8.46325e-125	Chlorophyllase-2, chloroplastic OS=Arabidopsis thaliana GN=CLH2 PE=1 SV=1	sp|Q9M7I7|CLH2_ARATH	3.24	1.45	0	1.74
		c27309.graph_c0	945	0.9874	2.7067e-78	Chlorophyllase-2, chloroplastic OS=Arabidopsis thaliana GN=CLH2 PE=1 SV=1	sp|Q9M7I7|CLH2_ARATH	0.38	1.18	0.18	2.01
		c61397.graph_c0	162	0.1662	4.97296e-49	Chlorophyllase-1 OS=Arabidopsis thaliana GN=CLH1 PE=1 SV=1	sp|O22527|CLH1_ARATH	0	0	1.48	0
Chlorophyll degradation	NYC1	c35486.graph_c0	1491	0.9842	0	Probable chlorophyll(ide) b reductase NYC1, chloroplastic OS=Oryza sativa subsp. japonica GN=NYC1 PE=1 SV=1	sp|Q5N800|NYC1_ORYSJ	50.5	221.15	959.26	855.83
		c49900.graph_c0	144	0.0966	1.20317e-33	Probable chlorophyll(ide) b reductase NYC1, chloroplastic OS=Arabidopsis thaliana GN=NYC1 PE=2 SV=1	sp|Q93ZA0|NYC1_ARATH	0	0	1.47	1.61
		c56544.graph_c0	297	0.1992	7.36853e-64	Probable chlorophyll(ide) b reductase NYC1, chloroplastic OS=Arabidopsis thaliana GN=NYC1 PE=2 SV=1	sp|Q93ZA0|NYC1_ARATH	0.98	0.87	0	0
		c24828.graph_c0	1026	0.9942	3.25038e-166	Chlorophyll(ide) b reductase NOL, chloroplastic OS=Oryza sativa subsp. japonica GN=NOL PE=1 SV=1	sp|Q84ST4|NOL_ORYSJ	26.01	20.91	20.71	17.89
	HCAR	c31236.graph_c0	630	0.4459	0	7-hydroxymethyl chlorophyll a reductase, chloroplastic OS=Oryza sativa subsp. japonica GN=HCAR PE=2 SV=2	sp|Q7XTG7|HCAR_ORYSJ	29.49	23.06	15.63	14.26
	PPH	c35959.graph_c0	1449	0.9421	0	Pheophytinase, chloroplastic OS=Arabidopsis thaliana GN=PPH PE=1 SV=1	sp|Q9FFZ1|PPH_ARATH	4.54	68.31	304.58	272.93
	PAO	c36607.graph_c0	1068	0.6593	0	Pheophorbide a oxygenase, chloroplastic OS=Arabidopsis thaliana GN=PAO PE=1 SV=1	sp|Q9FYC2|PAO_ARATH	26.53	195.76	315.63	236.16
	RCCR	c30782.graph_c0	921	1	4.52187e-77	Red chlorophyll catabolite reductase (Fragment) OS=Hordeum vulgare GN=rccR PE=2 SV=1	sp|Q9MTQ6|RCCR_HORVU	29.61	46.42	126.03	201.9
