# Supplementary material for: Structure of Pigment Metabolic Pathways and Their Contributions to White Tepal Color Formation of Chinese Narcissus tazetta var. chinensis cv Jinzhanyintai
Source: Int J Mol Sci. 2017 Sep 8;18(9):1923. doi: 10.3390/ijms18091923 (PMC5618572; doi:10.3390/ijms18091923)
Supplement: Supplementary file 1 [file ijms-18-01923-s001.zip › R-Table S19.xlsx]

## Sheet: Sheet1
Table S16. Primers used for semi-qRT-PCR analysis in this research.
Function	Gene	Representative uni-transcript	Forward primer (5'→3')	Reverse primer (5'→3')
Internal control	GAPDH	c28660.graph_c0	GGGCTATGTTGATGAGGATC	CCACTCGTTGTCATACCAAG
Phenylpropanoid biosynthesis	PAL	c37719.graph_c0	GGAGAATCTGAAGAGCACTG	CAGAACCTCGAAGGATGAAG
	C4H	c37762.graph_c0	GAACCTCTATGATGCCAAGC	GACTCCGAACGGAATGTATC
	4CL	c38303.graph_c0	CGGTGAGGAACATAGGATTC	GTCTGACCAGAATGTGGAAG
	HCT	c22698.graph_c0	GTGAGGATGGACGATGAGTA	CATGTATAGGCAACCTGGTC
	C3'H	c35438.graph_c0	GATACCATCATCGGACTCCT	CGGTCCAGTTCTTCTTGTAC
	COMT	c34620.graph_c0	GAAGGATGCCGTGTTAGATG	GATGATGGTGGAGTGATTCC-
	CCR	c30311.graph_c0	CCGTAAGAGATTCTGAGGAC	CTGGCTCTAAGATCAACTCC
	CAD	c37045.graph_c0	AGGAGTCTCAGGAGAACTAC	CAACTAGCATCCTGGAGTAC
	CCoAOMT	c30806.graph_c0	TGACTACCATCACCACTACC	CTCCCTTGGATAAACACTGG
Flavonoid biosynthesis	CHS	c31612.graph_c0	CTGATCTCCAAGAACATCGA	ATCTCGTCCATGATGAACAG
	CHI	c29518.graph_c0	GAGAAATGGAGAGGAAAGGG	GTCTGTGTAGATACCGATGG
	F3H	c31072.graph_c0	GGTGAACTCCAACTGTAGTC	CTTCCTCCGATACATCTCTG
	F3'H	c34619.graph_c0	GAATCGTCTCATGTCTGAAG	GTTCTGCGGGATATGGTAGC
	DFR	c35393.graph_c2	GTTGGACACCTCTTCATCTC	CATACTCGGATAGCGTCTTG
	ANS	c34412.graph_c1	CATGGAAGAGAAGGTGAAGC	CCTGCAAGAGATAGGAAGTG
Anthocyanin modification	UFGT	c36923.graph_c0	GTATACGACCGTGTGCTTAC	GTCTCCTTCCATCTCCTTAC
	3RT	c53224.graph_c0	GTCTGCTATGGATCTCACAC	TCTAGCTACCTCTGGAATCC
	5GT	c37200.graph_c1	CCTACATGGATTGGTTGGAC	CTTCTTCAGCACCGACATAC
	AA7GT	c15884.graph_c0	GGATACAGCTCTACGTATGG	CGATTCTGACTCCTCTTGAG
	5MaT1	c32884.graph_c0	GAGTCTGATCTCGACATCTG	GAATCTCGTCACCTGTACTG
	UGT75C1	c37200.graph_c0	GAGCGAGCTTAACGAAGATG	CTCCTCTCCTTTCTCTCCTT
	GT1	c38781.graph_c0	GGTGTATTGGTCCGCTTATC	CCAATCCGATAGCAATCTCC
	3'GT	c33042.graph_c0	GAGTTCAAGGTCTACAGAGC	GTCCACCAGAACGGAATATC
Flavone and flavonol biosynthesis	FLS	c24153.graph_c0	AGAAGGATCTGGAAGGGAAG	GATACGCAGTAGGTGTTTGG
	LuOMT	c52576.graph_c0	CAAAGAACGAACCGAGAAAG	GTAACTCAATAAGGTTAACACCAA
	SOT	c37902.graph_c0	GCCATCGTAGAGATGTGTAG	GATCCGTGTAGCTTGGTTAC
	F4ST	c37092.graph_c0	CCGATATGGGACCATTACAC	CACAGCTTCACAATCTCCTC
	GT4	c38892.graph_c0	GTTCCTCAAGAAGGCTATGG	AGTCTGGTCTAGGAGAAGTC
Flavanone biosynthesis	ANR	c35393.graph_c1	GGTAGATTTCTCTGTGCCAG	CTCCCTCAGTTCCTTCAAAC
	LAR	c28704.graph_c1	GAGTCACCATAACTGAGCAG	CGTCTTGTATAAGCTGTCCG
MEP pathway	DXS	c39384.graph_c0	GAGTGCTAGTTTAGGAGTCG	CCCGGTGAGTATCTTATGTG
	DXR	c33913.graph_c0	AGGAAGGAGAGAGGTACAAG	GGATTCTCAGCCACTATGTC
	MCT	c25490.graph_c0	GTGTCCATGATTCAGCTAGG	CTTCTGTCAAGGGTCTTCAC
	CMK	c32121.graph_c0	CCGTGGAGAGTATAATGCTG	CCTCGTCGTCGTATATGAAC
	MDS	c22809.graph_c0	CAGAACCCTAACAACTCCTG	GAGAGATGGAGGAGGAGATT
	HDS	c35510.graph_c0	CTGAACCACCAGAAGAAGAG	CCCTCGATAGTCTACCTCTT
	HDR	c32513.graph_c0	CTTGTCGAGAAGGAGAACTG	ACCTTGTCAGGAGTAGAAG
	IPPI	c29614c.graph_c0	GCTCCATAGAGCTTTCAGTG	GATGAAGAGGATGGCTACAG
Branched pathways	GGR	c36469.graph_c0	CATCCTATTCCAGAGCATCC	GAGCACTTGGTGACATATCC
	CPS	c31296.graph_c3	GCTCAACATATCCCATCCTC	GATAGTAGATCGGTTGGAGC
	KS	c36769.graph_c0	CATACTCGGGATGAGAAAGC	CTCGCTACTAAAGTGCCTAG
Carotenoid biosynthesis	GGPPS	c30585.graph_c0	GGTTCTATGCTGGGATGATC	CTGAATAGCCTCCTCATAGC
	PSY	c31880.graph_c0	GAGAGGAGAAGAGCCATTTG	GGGAATCTTGAGACGGTATC
	PDS	c39397.graph_c0	GATTTCCCAGAGGTTCTTCC	CTTCTCATCCACTCGGTAAC
	Z-ISO	c26604.graph_c0	CTTTCTCGTCTCATTCCCTC	GATTCGTCGGAGATCGTATC
	ZDS	c33832.graph_c0	CCCTAATACAGGCTGTTCTC	GAACTTCCAGTCCTTGAGAG
	CRTISO	c33278.graph_c0	GTCTCAAAGGCTCCATAGTG	CCAACACAGTAGAGACCATC
	LYC-ε	c34291.graph_c0	GGATGAAGAACCCAGTAGAG	GTCCAGGATAGAATCACCAG
	LYC-β	c22424.graph_c0	CGATGCCCTTCTCTTCTAAC	GGAATCACACACCTCTCATC
	BCH	c24102.graph_c0	TCTTCTGTACTATGGCTTCTTC	AGAATGGTGGATCTGATGAG
	CYP97A3	c34249.graph_c0	CCTCCTGTAGAGATGACAAC	CTTCCATCTACCGTTACGAC
	CYP97C1	c13845.graph_c0	CTTCCCTCACACGATCTCTA	GGGTCCATACTCATTCATCC
	ZEP	c29571.graph_c0	CTCAGTTGGGTCAGAAGAAG	CCCTCCACCAGCTATAAGTA
	VDE	c31484.graph_c0	CAATACTTGTGGACCTGAGC	CAAGAAGTTCTCCGCATCTC
	CCS	c35123.graph_c0	GTGTCCCTCTATCTTCGTTC	GTCTATGGATAGGGTTTCGG
Carotenoid degradation	CCD1	c32109.graph_c0	TTCACATTCACCTCCTTA	TCAGTAATAGCGAAGTCA
	CCD4	c37669.graph_c0	GCCCTATATTCCCAAAGGTC	CATAAGGCAGGTCTTCTTCC
	CCD7	c46794.graph_c0	CTAGCCGAGTCTAAATCC	ATCGTCAGTAAACATACCC
	CCD8	c32369.graph_c1	CCAAAGGGAGAATTATAC	CAAGCATAAGTGTATCTAT
	NCED1	c33223.graph_c0	CTACATCGTCACCTTCGTTC	CATAGGGAACTCTTGATGGC
	AAO3	c20400.graph_c0	ATTAGCCTATCAACCAATACACTA	GATAACATTTGAGCCAGCAC
	CYP707A	c32258.graph_c0	CTGCTACATCACCTCACTAC	CGGTCTTGAGAGAGAACTTC
	BG1	c40682.graph_c0	GAGTTGGACGACTGATTCTC	GGTCTTCTCCGTATCCATTC
ALA formation	HemA	c35985.graph_c0	CCTAGATGCGAGATTGGTAC	GGTGCCGTATGGATACTAAG
	HemL	c37283.graph_c0	GTGGGATGTTGATGGTAACC	CTAGGGACGGCTGAAATAAC
Proto IX formation	HemB	c31368.graph_c0	CTAGTTCCTCGGACAATACG	CCTGACGATACCATCATGTC
	HemC	c36032.graph_c0	CACGAAGAGACGAGATTAGC	GGAAGCTACTAGACCTCTGA
	HemD	c31392.graph_c0	GAGGTCACAAGGCTGAAT	CGCCAATACAAGCAACAG
	HemE	c21380.graph_c0	TCTCTATGCTAGTGGGTCTG	CTTCTTCCATATCGACCGTC
	HemF	c31690.graph_c0	GTTGTGCCAGCATATCTACC	CCCTGTCTTCAATCCGAATG
	HemN	c20109.graph_c0	CTCCTGGTGAATTTCCCTTG	CTAGACCGAAGCCATAGAAC
	HemY	c32739.graph_c0	GAAGGATGATCTCGTGTTCG	GGGTAAATCAGTGGGTTTCG
Heme formation	HemH	c36969.graph_c0	CAGATGGAGGACTGTATCAG	CCTCATCCGTATAAGGCTTC
	COX10	c28536.graph_c0	GCTACTGGTATCTGATGGTC	CGGGGAAACATAAACAGGAG
	COX15	c33455.graph_c0	GATACTTGTTGCTGGAGGAC	CTCTGTTAACGGTGGTAGAC
Chlorophyll biosynthesis	ChlH	c38753.graph_c0	GAGAACCTGTTAGTCTACGG	CTGGCAGACTTGGAGAATAG
	ChlD	c35182.graph_c0	GAGAAGAGTGGAGATGTTGG	GGGTCTGTAGATCGCTTTAG
	ChlI	c33919.graph_c0	GAGACTCCATGTTCCTCTTC	CCCATTATCATCACTCCTCC
	ChlM	c34096.graph_c0	CAGTCGTTGTCAGGAATCAC	GCCTTCTCTTGCGGATAATG
	ChlE	c35935.graph_c0	GGCAGATATTCGTGGAGTTC	GCAAGGTTGAAGTCAGAGAG
	4VCR	c38272.graph_c2	GGTGGAGAGTATGTTGGTTC	GCCATCCCTTCTCTAATCAC
	POR	c25974.graph_c0	AGTCCTTTAGTCCTCAGGTG	CGCCAGTGATTACTACAGTG
	CAO	c36852.graph_c0	CTTATCATGGGTGGGAGTAC	GCAAGGAAGGAAGTGTAGTC
	ChlG	c35800.graph_c2	GAGCCTTATCGTCCTATTCC	GCCAGATAGAAGATGACAGG
	CLH	c40400.graph_c0	GACCAGATTCCGAAGAAGAG	GACAGAGCGAGTTTGTGTAG
Chlorophyll degradation	NYC1	c35486.graph_c0	CTCGGTGGAGTTATCATTGG	CTCGTGTGCTTCCAGTTATG
	HCAR	c31236.graph_c0	GTGATACTTACTACATTG	TAGCATACATTAACTCTT
	PPH	c35959.graph_c0	GTCACTGCCTTCTGAAGATC	CTGAGATTCCTCTCCAAACC
	PAO	c36607.graph_c0	GAGAGTAGTTGGGAGAAAGC	CTTCTTCCTGTGACCTTGTG
	RCCR	c30782.graph_c0	CCGATCTGGATAGATTGAGG	GAGTCCCAACTATCTCTTCC
